# Supplementary material for: circRNA Expression Pattern and circRNA–miRNA–mRNA Network in HCs, HSCs, and KCs of Murine Liver After Echinococcus multilocularis Infection
Source: Front Vet Sci. 2022 Mar 24;9:825307. doi: 10.3389/fvets.2022.825307 (PMC8987445; doi:10.3389/fvets.2022.825307)
Supplement: Supplementary file 2 [file Table_1.XLS]

## Sheet: Sheet1
st_gene_id	gene_id	gene_symbol	diffexp_log2fc_HC_2M_C-vs-HC_2M_E	diffexp_possiondis_fdr_HC_2M_C-vs-HC_2M_E	diffexp_possiondis_pvalue_HC_2M_C-vs-HC_2M_E	diffexp_log2fc_HC_2M_C-vs-HSC_2M_C	diffexp_possiondis_fdr_HC_2M_C-vs-HSC_2M_C	diffexp_possiondis_pvalue_HC_2M_C-vs-HSC_2M_C	diffexp_log2fc_HC_3M_C-vs-HC_3M_E	diffexp_possiondis_fdr_HC_3M_C-vs-HC_3M_E	diffexp_possiondis_pvalue_HC_3M_C-vs-HC_3M_E	diffexp_log2fc_HC_3M_C-vs-HSC_3M_C	diffexp_possiondis_fdr_HC_3M_C-vs-HSC_3M_C	diffexp_possiondis_pvalue_HC_3M_C-vs-HSC_3M_C	diffexp_log2fc_HSC_2M_C-vs-HSC_2M_E	diffexp_possiondis_fdr_HSC_2M_C-vs-HSC_2M_E	diffexp_possiondis_pvalue_HSC_2M_C-vs-HSC_2M_E	diffexp_log2fc_HSC_2M_C-vs-KC_2M_C	diffexp_possiondis_fdr_HSC_2M_C-vs-KC_2M_C	diffexp_possiondis_pvalue_HSC_2M_C-vs-KC_2M_C	diffexp_log2fc_HSC_3M_C-vs-HSC_3M_E	diffexp_possiondis_fdr_HSC_3M_C-vs-HSC_3M_E	diffexp_possiondis_pvalue_HSC_3M_C-vs-HSC_3M_E	diffexp_log2fc_HSC_3M_C-vs-KC_3M_C	diffexp_possiondis_fdr_HSC_3M_C-vs-KC_3M_C	diffexp_possiondis_pvalue_HSC_3M_C-vs-KC_3M_C	diffexp_log2fc_KC_2M_C-vs-KC_2M_E	diffexp_possiondis_fdr_KC_2M_C-vs-KC_2M_E	diffexp_possiondis_pvalue_KC_2M_C-vs-KC_2M_E	diffexp_log2fc_KC_3M_C-vs-KC_3M_E	diffexp_possiondis_fdr_KC_3M_C-vs-KC_3M_E	diffexp_possiondis_pvalue_KC_3M_C-vs-KC_3M_E
C10090_8658	mmu_circ_0000010	mmu_circ_0000010	NA	NA	NA	NA	NA	NA	-8.69523	0.00124248	0.000151767	-8.69523	0.000148402	5.67488e-05	8.08746	0.00425426	0.000678492	NA	NA	NA	8.87067	0.00031529	1.32359e-05	NA	NA	NA	NA	NA	NA	NA	NA	NA
C10090_2810	mmu_circ_0000011	mmu_circ_0000011	-8.74786	0.000392403	3.91668e-05	-0.232946	0.55362	0.493066	-9.6339	3.125e-06	4.95618e-08	-1.03436	0.0313189	0.0214512	0.572286	0.500579	0.251056	-8.51491	0.000453195	0.000167231	0.667011	0.41735	0.194031	-8.59954	0.000587012	0.000233212	NA	NA	NA	NA	NA	NA
C10090_8272	mmu_circ_0000012	mmu_circ_0000012	8.30469	0.0033364	0.000689242	8.29278	0.00214161	0.00113783	-8.56986	0.00213497	0.00031484	-8.56986	0.000306978	0.000126979	-8.29278	0.00175584	0.000169237	-8.29278	0.00129256	0.000584804	NA	NA	NA	NA	NA	NA	NA	NA	NA	NA	NA	NA
C10090_653	mmu_circ_0000013	mmu_circ_0000013	-0.832185	0.182168	0.0795554	-0.628749	0.10873	0.0809504	-0.166866	0.92687	0.840218	0.0516817	0.929812	0.911604	-0.0058232	0.995518	0.984744	-0.72203	0.267724	0.204004	-0.124481	0.888388	0.748302	-0.0325985	0.968208	0.955892	-8.23362	0.00378905	0.000822422	-9.03645	0.000159126	7.87752e-06
C10090_10081	mmu_circ_0000014	mmu_circ_0000014	-0.0951572	0.933761	0.870044	-0.554589	0.265886	0.215142	0.0965252	0.910055	0.809022	-8.43212	0.000603709	0.000284122	-0.343247	0.804244	0.582038	-8.29278	0.0012798	0.000584804	NA	NA	NA	NA	NA	NA	NA	NA	NA	NA	NA	NA
C10090_14888	mmu_circ_0000023	mmu_circ_0000023	-0.679987	0.263318	0.126762	-0.528235	0.143457	0.108836	8.94369	0.000378407	2.77962e-05	9.4227	4.76078e-06	1.34287e-06	-0.0799696	0.941412	0.85125	0.388189	0.435015	0.359124	0.10693	0.935272	0.840338	0.137255	0.802509	0.744154	0.673943	0.166125	0.0665048	-0.296681	0.70137	0.480146
C10090_5836	mmu_circ_0000024	mmu_circ_0000024	NA	NA	NA	9.9555	2.20467e-09	3.68274e-10	NA	NA	NA	9.94354	1.93019e-08	3.59708e-09	-0.0797553	0.920155	0.806662	1.18475	8.13108e-05	2.29864e-05	0.138609	0.879801	0.72986	0.765199	0.0270976	0.0166481	-0.68349	0.0302702	0.00918686	0.692087	0.0248511	0.00704758
C10090_4804	mmu_circ_0000026	mmu_circ_0000026	0.167835	0.764906	0.593176	1.09719	0.00110509	0.000550618	0.615705	0.158044	0.060201	0.952277	0.0180833	0.0120436	-0.146965	0.746286	0.502756	-0.255575	0.351082	0.278534	0.391997	0.314889	0.129823	0.438353	0.130793	0.0908926	-0.33924	0.386996	0.20145	0.239449	0.567617	0.337466
C10090_3893	mmu_circ_0000027	mmu_circ_0000027	NA	NA	NA	NA	NA	NA	NA	NA	NA	NA	NA	NA	8.21286	0.00238473	0.000348676	NA	NA	NA	8.43003	0.0022926	0.000260958	8.62132	0.000345453	0.000129993	NA	NA	NA	-8.62132	0.00122481	0.000147255
C10090_8179	mmu_circ_0000032	mmu_circ_0000032	NA	NA	NA	8.79507	0.000166151	6.42714e-05	NA	NA	NA	NA	NA	NA	-8.79507	0.000163	4.59342e-06	-8.79507	9.01316e-05	2.55724e-05	NA	NA	NA	NA	NA	NA	NA	NA	NA	NA	NA	NA
C10090_10144	mmu_circ_0000036	mmu_circ_0000036	-0.132937	0.657417	0.459682	-3.50901	8.01293e-37	2.61452e-38	0.0615513	0.721232	0.518348	-2.06758	1.99125e-14	1.97591e-15	0.727341	0.279771	0.107406	-8.7077	0.000154178	4.78212e-05	-0.276266	0.681893	0.431524	-9.75706	5.78546e-08	7.4572e-09	NA	NA	NA	8.74886	0.00104358	0.000107015
C10090_6915	mmu_circ_0000040	mmu_circ_0000040	NA	NA	NA	8.40812	0.00123742	0.00064042	NA	NA	NA	8.70667	0.000596122	0.000277272	-0.0798913	0.950881	0.884084	0.503275	0.428443	0.351942	-0.0838847	0.931062	0.830916	-8.70667	0.000334336	0.000122124	0.28238	0.758532	0.574184	8.64169	0.00150526	0.000206166
C10090_15873	mmu_circ_0000041	mmu_circ_0000041	NA	NA	NA	9.83684	1.14632e-08	2.0654e-09	NA	NA	NA	9.2211	2.46405e-05	7.93702e-06	-0.401794	0.524955	0.272286	-1.11814	0.0190037	0.0115549	0.259686	0.79092	0.580636	-0.377497	0.545773	0.463624	0.401015	0.646207	0.443676	-0.201917	0.841565	0.694956
C10090_13386	mmu_circ_0000043	mmu_circ_0000043	NA	NA	NA	9.35138	2.48185e-06	6.47328e-07	NA	NA	NA	9.75706	1.75236e-07	3.844e-08	0.5983	0.272691	0.103853	2.35451	8.76939e-16	3.9011e-17	-0.433777	0.479972	0.243194	1.81844	1.34726e-09	1.31099e-10	0.54958	0.0069956	0.00190339	-0.0642829	0.844397	0.704062
C10090_10193	mmu_circ_0000044	mmu_circ_0000044	-0.457769	0.587925	0.38765	-9.11061	1.21722e-06	2.97248e-07	NA	NA	NA	NA	NA	NA	7.94953	0.00627714	0.00132029	NA	NA	NA	NA	NA	NA	NA	NA	NA	NA	NA	NA	NA	NA	NA
C10090_3401	mmu_circ_0000046	mmu_circ_0000046	NA	NA	NA	8.95565	5.81243e-05	2.03608e-05	NA	NA	NA	8.35843	0.00287584	0.00163882	0.256968	0.794019	0.570098	-8.95565	2.95782e-05	7.3127e-06	0.908121	0.232317	0.08724	0.485176	0.490264	0.40618	NA	NA	NA	0.419662	0.661958	0.431006
C10090_1132	mmu_circ_0000048	mmu_circ_0000048	NA	NA	NA	8.51491	0.000758421	0.000360456	NA	NA	NA	NA	NA	NA	-8.51491	0.000682338	3.999e-05	-8.51491	0.000456747	0.000167231	NA	NA	NA	8.73674	0.000188682	6.19208e-05	8.19377	0.00483392	0.00115653	-8.73674	0.000756711	7.0819e-05
C10090_5177	mmu_circ_0000051	mmu_circ_0000051	-0.390481	0.559741	0.360978	-9.6954	1.06774e-09	1.73318e-10	0.155262	0.83466	0.662108	-9.11035	7.90278e-06	2.2639e-06	NA	NA	NA	NA	NA	NA	NA	NA	NA	NA	NA	NA	NA	NA	NA	NA	NA	NA
C10090_12682	mmu_circ_0000054	mmu_circ_0000054	8.54574	0.00118609	0.0001825	NA	NA	NA	8.52865	0.00233674	0.000386206	NA	NA	NA	NA	NA	NA	NA	NA	NA	NA	NA	NA	NA	NA	NA	NA	NA	NA	8.2635	0.00589373	0.00147413
C10090_593	mmu_circ_0000055	mmu_circ_0000055	NA	NA	NA	10.4625	3.21066e-13	3.73578e-14	NA	NA	NA	10.8061	4.34945e-15	4.08628e-16	0.273815	0.554033	0.299248	-0.966048	0.00877153	0.00506368	0.324504	0.425441	0.204368	-1.31021	0.000344541	0.000132572	-1.30268	0.0413736	0.0129573	0.693475	0.201139	0.0783312
C10090_15580	mmu_circ_0000057	mmu_circ_0000057	-0.240363	0.481993	0.288138	-0.187613	0.162406	0.125012	-0.0457161	0.973742	0.94123	-0.70025	0.00236444	0.00131254	-0.339884	0.296163	0.116784	-0.287535	0.266596	0.20298	0.176085	0.759692	0.538036	0.552163	0.0447389	0.0284064	0.0997117	0.837366	0.695366	-0.0760724	0.850074	0.693766
C10090_8201	mmu_circ_0000058	mmu_circ_0000058	8.75221	0.000466621	4.83228e-05	NA	NA	NA	-8.43212	0.00346218	0.000653132	0.788979	0.277745	0.223846	8.8756	0.000128266	3.3003e-06	NA	NA	NA	-1.0136	0.142071	0.0472088	0.274751	0.614072	0.537394	8.67913	0.000803613	7.6869e-05	-9.49586	4.92221e-06	9.74696e-08
C10090_5366	mmu_circ_0000060	mmu_circ_0000060	0.330066	0.487352	0.292646	0.995294	0.00400804	0.00240252	-0.304319	0.713601	0.507304	0.444816	0.343308	0.284164	-0.133597	0.785118	0.55521	-1.69424	5.84677e-07	9.22922e-08	0.530937	0.12495	0.040058	-1.47577	0.000288109	0.00010188	-0.329246	0.67036	0.469284	0.724447	0.252181	0.105046
C10090_5142	mmu_circ_0000061	mmu_circ_0000061	-0.426445	0.413592	0.231864	0.710366	0.0577245	0.041093	0.146449	0.744731	0.540624	1.02975	0.00246784	0.00137319	0.150781	0.750213	0.509998	-0.410211	0.16568	0.119556	0.0820454	0.905724	0.77747	-1.90032	8.3916e-08	1.12789e-08	-1.26223	0.00250091	0.000476082	0.0493569	0.982816	0.947368
C10090_12125	mmu_circ_0000064	mmu_circ_0000064	-8.26256	0.00313804	0.000705366	0.252347	0.891334	0.86975	NA	NA	NA	8.59954	0.000989361	0.00050132	-0.30205	0.809252	0.596404	-8.51491	0.000449945	0.000167231	-0.169507	0.876054	0.721994	-0.24111	0.767757	0.706232	NA	NA	NA	0.283259	0.845359	0.67278
C10090_1978	mmu_circ_0000066	mmu_circ_0000066	-0.358202	0.415743	0.233292	0.29752	0.584105	0.52597	-0.352289	0.514475	0.296174	0.305825	0.467716	0.402884	0.264143	0.471151	0.228504	-0.24868	0.396732	0.320932	-0.40353	0.184778	0.0649886	-0.260602	0.357329	0.281348	0.43122	0.210757	0.0889022	-0.214239	0.61217	0.381704
C10090_777	mmu_circ_0000073	mmu_circ_0000073	NA	NA	NA	NA	NA	NA	NA	NA	NA	NA	NA	NA	7.94953	0.00645899	0.00132029	8.23362	0.00102313	0.00044214	NA	NA	NA	NA	NA	NA	-8.23362	0.00377672	0.000822422	NA	NA	NA
C10090_9698	mmu_circ_0000074	mmu_circ_0000074	0.239247	0.726904	0.541336	0.050774	0.856839	0.825892	-0.0199741	0.95781	0.91437	-0.06451	0.712669	0.659356	0.43477	0.465018	0.2242	0.440884	0.303903	0.236182	0.323985	0.617882	0.368174	0.352972	0.397566	0.318424	0.237853	0.694004	0.496654	-0.135624	0.834491	0.658032
C10090_8580	mmu_circ_0000077	mmu_circ_0000077	NA	NA	NA	NA	NA	NA	NA	NA	NA	NA	NA	NA	NA	NA	NA	8.91139	1.91198e-05	4.48402e-06	NA	NA	NA	8.84361	9.94488e-05	2.94952e-05	-8.91139	0.000198963	1.17009e-05	-8.84361	0.000466056	3.40588e-05
C10090_5756	mmu_circ_0000079	mmu_circ_0000079	NA	NA	NA	9.23122	7.06198e-06	2.04338e-06	NA	NA	NA	8.89905	0.000209283	8.48184e-05	-0.355625	0.685968	0.428082	0.00215883	0.993028	0.990178	-0.276271	0.772749	0.55503	1.26661	0.00483631	0.00269242	0.445748	0.505456	0.300838	-0.416965	0.450786	0.237614
C10090_8306	mmu_circ_0000080	mmu_circ_0000080	0.53278	0.328919	0.169784	1.11498	0.00830187	0.00539204	0.776603	0.0461797	0.0146223	1.13265	0.00243988	0.0013571	0.620571	0.0408782	0.01071	0.586244	0.0352941	0.0222198	-0.0170221	0.955013	0.875628	0.765199	0.00141036	0.000690978	0.179923	0.652204	0.449642	-0.722968	0.00457117	0.00106143
C10090_3210	mmu_circ_0000081	mmu_circ_0000081	-0.883895	0.234032	0.108781	0.766916	0.154564	0.118469	8.94369	0.000375562	2.77962e-05	10.1471	1.16069e-09	1.8617e-10	-0.11835	0.885886	0.72054	-0.400149	0.356502	0.283638	-0.35445	0.507928	0.264042	-0.355915	0.411379	0.331842	-1.0988	0.0770658	0.0263742	-0.326209	0.639406	0.404716
C10090_7036	mmu_circ_0000083	mmu_circ_0000083	NA	NA	NA	8.79507	0.000162109	6.42714e-05	NA	NA	NA	9.2914	1.43849e-05	4.38984e-06	1.15462	0.0182039	0.00440134	0.76029	0.13191	0.093105	-0.0248486	0.968904	0.90516	-0.795546	0.191919	0.139352	-9.55536	1.31365e-06	1.98568e-08	0.145835	0.92902	0.8366
C10090_14737	mmu_circ_0000086	mmu_circ_0000086	-1.44333	0.0119246	0.00363768	0.714477	0.11094	0.0826642	NA	NA	NA	10.3585	3.85685e-11	5.32916e-12	0.432088	0.247188	0.091667	0.493366	0.0924698	0.063182	0.122148	0.879767	0.729464	0.16962	0.654531	0.578352	-0.624615	0.0710555	0.024032	0.562944	0.129328	0.0454568
C10090_9828	mmu_circ_0000087	mmu_circ_0000087	0.0798836	0.901426	0.803492	0.719708	0.0885021	0.0647102	-0.974103	0.0675949	0.0224752	0.566348	0.165845	0.126874	0.456199	0.176572	0.0592058	0.969356	9.38729e-05	2.75576e-05	-0.160948	0.7176	0.483196	0.859625	0.000561142	0.000220198	-0.522308	0.0513533	0.0166043	-0.0661038	0.852729	0.688696
C10090_10133	mmu_circ_0000089	mmu_circ_0000089	0.419365	0.282408	0.138597	0.913868	0.00488413	0.0029397	-0.645878	0.190919	0.0755922	0.788701	0.0108516	0.00705296	-0.00434037	0.993276	0.980092	1.46556	1.46028e-16	5.95726e-18	-0.276381	0.373794	0.164882	1.54437	4.80524e-19	1.60956e-20	-0.465555	0.00519653	0.00139057	-0.433248	0.00516996	0.00120535
C10090_9648	mmu_circ_0000090	mmu_circ_0000090	-0.510199	0.335018	0.174098	-0.08092	0.572122	0.512714	-0.479795	0.416143	0.21664	-0.0452156	0.694643	0.639622	1.48085	3.20972e-07	2.29406e-09	0.948003	0.00179624	0.000862402	0.287508	0.587964	0.33426	1.16822	1.49148e-05	3.50026e-06	0.251733	0.505654	0.300598	0.118643	0.797202	0.613594
C10090_4230	mmu_circ_0000093	mmu_circ_0000093	NA	NA	NA	NA	NA	NA	NA	NA	NA	NA	NA	NA	NA	NA	NA	NA	NA	NA	NA	NA	NA	8.35843	0.00120269	0.000572918	NA	NA	NA	-0.0949275	0.934919	0.859544
C10090_15107	mmu_circ_0000094	mmu_circ_0000094	-8.26256	0.00286517	0.000705366	-8.26256	0.000482661	0.000222858	NA	NA	NA	NA	NA	NA	7.94953	0.00588303	0.00132029	NA	NA	NA	NA	NA	NA	NA	NA	NA	NA	NA	NA	NA	NA	NA
C10090_2807	mmu_circ_0000095	mmu_circ_0000095	-0.131737	0.855228	0.70899	0.634903	0.102934	0.0760438	-0.16675	0.882163	0.76459	0.193198	0.81972	0.781124	-0.16115	0.745568	0.504556	-0.0552742	0.861087	0.822958	0.84642	0.00622674	0.00111842	0.552219	0.0778344	0.0516146	0.0295581	0.970759	0.92605	0.12741	0.838294	0.662612
C10090_735	mmu_circ_0000097	mmu_circ_0000097	NA	NA	NA	8.16692	0.00355377	0.00202156	NA	NA	NA	NA	NA	NA	-0.217381	0.890058	0.730658	-8.16692	0.00225278	0.0010936	8.08215	0.00852349	0.00156122	NA	NA	NA	NA	NA	NA	NA	NA	NA
C10090_9799	mmu_circ_0000098	mmu_circ_0000098	-0.220599	0.785805	0.62263	1.33184	0.000480641	0.000223306	-0.514658	0.657333	0.440234	2.17132	9.3021e-08	1.95047e-08	-0.252343	0.57002	0.311608	-2.13865	5.542e-08	6.8849e-09	-0.400125	0.22934	0.0857392	-11.089	9.99579e-20	3.24222e-21	-8.7187	0.000552578	4.82886e-05	NA	NA	NA
C10090_6130	mmu_circ_0000100	mmu_circ_0000100	NA	NA	NA	10.9171	4.90288e-18	3.80318e-19	NA	NA	NA	10.3585	3.863e-11	5.32916e-12	-0.456413	0.204523	0.071794	-1.36172	5.67646e-05	1.54188e-05	-0.121092	0.824123	0.634616	-1.0743	0.00914818	0.00530234	-0.513697	0.443548	0.246602	-0.642555	0.408665	0.205874
C10090_11411	mmu_circ_0000109	mmu_circ_0000109	NA	NA	NA	8.02956	0.00580702	0.0035917	NA	NA	NA	NA	NA	NA	-8.02956	0.00389697	0.000716208	-8.02956	0.00381192	0.00204506	8.32328	0.00323111	0.000473734	NA	NA	NA	NA	NA	NA	NA	NA	NA
C10090_7233	mmu_circ_0000111	mmu_circ_0000111	NA	NA	NA	8.16692	0.00341932	0.00202156	NA	NA	NA	8.89905	0.000208153	8.48184e-05	-0.0794534	0.95333	0.892786	-8.16692	0.00215278	0.0010936	-8.89905	9.00553e-05	2.46392e-06	-8.89905	0.000105523	3.34892e-05	NA	NA	NA	NA	NA	NA
C10090_5513	mmu_circ_0000113	mmu_circ_0000113	-0.305939	0.310517	0.157626	-3.01274	1.07935e-21	7.08784e-23	0.872802	0.00459561	0.001092	-10.2803	1.87664e-12	2.28748e-13	0.18332	0.889338	0.726072	-8.61434	0.000264058	8.94268e-05	9.26655	2.39272e-05	3.69802e-07	NA	NA	NA	NA	NA	NA	NA	NA	NA
C10090_3753	mmu_circ_0000115	mmu_circ_0000115	-8.52552	0.00110327	0.000166213	-8.52552	0.000113223	4.25894e-05	-0.697411	0.323113	0.151217	-9.81089	4.15063e-09	7.19626e-10	7.94953	0.00612839	0.00132029	9.08135	4.99425e-06	9.70592e-07	8.2075	0.00514069	0.000860002	8.49586	0.000654438	0.000272902	-9.08135	6.66921e-05	2.83528e-06	0.53288	0.595386	0.36366
C10090_11302	mmu_circ_0000116	mmu_circ_0000116	NA	NA	NA	8.7077	0.000274519	0.00011419	NA	NA	NA	NA	NA	NA	0.00757141	0.997034	0.993776	0.0109999	0.981119	0.974482	8.08215	0.00815169	0.00156122	8.84361	9.79091e-05	2.94952e-05	0.322955	0.735622	0.54468	0.267789	0.814438	0.634924
C10090_11117	mmu_circ_0000121	mmu_circ_0000121	NA	NA	NA	8.61434	0.000463282	0.000202882	NA	NA	NA	NA	NA	NA	-0.0798443	0.951175	0.876006	-8.61434	0.000267458	8.94268e-05	8.2075	0.00520568	0.000860002	NA	NA	NA	NA	NA	NA	NA	NA	NA
C10090_8838	mmu_circ_0000123	mmu_circ_0000123	8.30469	0.00329795	0.000689242	9.83684	1.16355e-08	2.0654e-09	8.26538	0.00589277	0.00143958	NA	NA	NA	-1.12156	0.0281643	0.0070454	-9.83684	3.24185e-09	3.26976e-10	8.2075	0.00534765	0.000860002	NA	NA	NA	NA	NA	NA	NA	NA	NA
C10090_9469	mmu_circ_0000128	mmu_circ_0000128	-0.0951944	0.921408	0.840782	-1.17136	0.0139992	0.0092562	-0.707341	0.248518	0.105866	-10.1104	4.13012e-11	5.734e-12	-0.205319	0.889044	0.733094	-8.29278	0.00128325	0.000584804	NA	NA	NA	NA	NA	NA	NA	NA	NA	NA	NA	NA
C10090_11202	mmu_circ_0000130	mmu_circ_0000130	NA	NA	NA	10.515	1.05624e-13	1.18347e-14	NA	NA	NA	10.9435	1.38087e-16	1.16971e-17	0.15715	0.78399	0.553292	-2.14432	1.57984e-06	2.74966e-07	-0.438126	0.208506	0.0766438	-2.58511	2.2983e-09	2.35336e-10	0.501218	0.599331	0.388702	-8.35843	0.00334249	0.000636664
C10090_6899	mmu_circ_0000133	mmu_circ_0000133	-0.510106	0.460806	0.268444	1.2482	0.00137066	0.000715848	-0.429787	0.622218	0.402174	0.561278	0.267068	0.214888	-0.313056	0.471025	0.227962	-0.692366	0.0297186	0.0184842	0.272945	0.640351	0.391192	0.0275653	0.949091	0.928568	0.0758703	0.918782	0.83502	0.634394	0.104982	0.0355632
C10090_9896	mmu_circ_0000135	mmu_circ_0000135	NA	NA	NA	NA	NA	NA	-0.0510115	0.996818	0.991548	-8.69523	0.000147892	5.67488e-05	NA	NA	NA	NA	NA	NA	NA	NA	NA	NA	NA	NA	NA	NA	NA	NA	NA	NA
C10090_8616	mmu_circ_0000141	mmu_circ_0000141	-0.854289	0.206203	0.0930316	1.23832	0.00244134	0.00136621	-0.401114	0.690729	0.478552	1.19474	0.00453452	0.00269178	-0.177685	0.746337	0.502638	0.273121	0.365589	0.29379	-0.331883	0.440957	0.214032	0.694681	0.0109938	0.00643036	0.793215	0.00221085	0.000379092	-0.251101	0.479448	0.26199
C10090_3880	mmu_circ_0000142	mmu_circ_0000142	-8.52552	0.00109936	0.000166213	0.98939	0.112642	0.084002	NA	NA	NA	8.59954	0.000989791	0.00050132	-9.51491	2.51725e-07	1.64493e-09	0.15149	0.757738	0.696846	1.06757	0.0780982	0.0232272	1.96031	1.01108e-05	2.20136e-06	0.375258	0.524513	0.316764	-0.760573	0.0689739	0.022097
C10090_11363	mmu_circ_0000143	mmu_circ_0000143	0.0568111	0.933244	0.864568	0.535819	0.310853	0.254972	9.11348	0.000143319	7.45704e-06	9.2211	2.49645e-05	7.93702e-06	-0.43356	0.396632	0.176488	-1.9976	3.55991e-05	8.92532e-06	0.208931	0.843352	0.66827	-9.2211	1.13457e-05	2.51832e-06	0.0977452	0.956652	0.889546	8.2635	0.00601273	0.00147413
C10090_16082	mmu_circ_0000148	mmu_circ_0000148	NA	NA	NA	NA	NA	NA	NA	NA	NA	NA	NA	NA	NA	NA	NA	NA	NA	NA	NA	NA	NA	9.55995	2.49504e-07	3.72378e-08	NA	NA	NA	-1.15907	0.0720446	0.0232506
C10090_6637	mmu_circ_0000149	mmu_circ_0000149	NA	NA	NA	8.02956	0.00567705	0.0035917	NA	NA	NA	NA	NA	NA	0.183298	0.902339	0.778698	1.20382	0.0439266	0.0281678	NA	NA	NA	9.79116	1.64417e-08	1.91709e-09	-9.23338	2.23758e-05	6.87022e-07	-0.206013	0.764768	0.579976
C10090_7712	mmu_circ_0000152	mmu_circ_0000152	NA	NA	NA	9.4625	8.54108e-07	2.0507e-07	NA	NA	NA	9.35865	8.25361e-06	2.42796e-06	-0.664841	0.319354	0.129059	-9.4625	3.2855e-07	4.88986e-08	-0.414086	0.58231	0.328492	-9.35865	3.55232e-06	6.90582e-07	NA	NA	NA	NA	NA	NA
C10090_568	mmu_circ_0000154	mmu_circ_0000154	NA	NA	NA	NA	NA	NA	NA	NA	NA	NA	NA	NA	NA	NA	NA	8.23362	0.00102459	0.00044214	NA	NA	NA	NA	NA	NA	-8.23362	0.00379731	0.000822422	NA	NA	NA
C10090_11233	mmu_circ_0000157	mmu_circ_0000157	-0.0595838	0.937754	0.877278	-0.696891	0.0257971	0.0175492	0.130207	0.76068	0.561938	-1.25302	0.00196648	0.00108816	-0.545527	0.413195	0.186896	-0.194768	0.710481	0.640132	-0.193905	0.831497	0.652972	1.13704	0.0112721	0.00661226	0.201226	0.807964	0.644234	-0.538583	0.316866	0.144614
C10090_13387	mmu_circ_0000158	mmu_circ_0000158	8.16742	0.00489299	0.00133945	NA	NA	NA	-8.43212	0.0033678	0.000653132	-8.43212	0.000592355	0.000284122	NA	NA	NA	NA	NA	NA	7.94486	0.0119983	0.00283418	NA	NA	NA	NA	NA	NA	NA	NA	NA
C10090_1994	mmu_circ_0000161	mmu_circ_0000161	8.30469	0.00323174	0.000689242	8.95565	5.83293e-05	2.03608e-05	NA	NA	NA	9.1472	4.2685e-05	1.43504e-05	0.256968	0.794245	0.570098	-8.95565	2.97014e-05	7.3127e-06	0.475579	0.523468	0.28196	-9.1472	2.00215e-05	4.80906e-06	8.87191	0.000292359	1.98174e-05	8.64169	0.00155615	0.000206166
C10090_3608	mmu_circ_0000163	mmu_circ_0000163	0.0118771	0.98622	0.973816	-8.64097	5.43271e-05	1.86182e-05	0.0965252	0.907782	0.809022	-8.43212	0.000596735	0.000284122	NA	NA	NA	NA	NA	NA	NA	NA	NA	NA	NA	NA	NA	NA	NA	NA	NA	NA
C10090_15914	mmu_circ_0000164	mmu_circ_0000164	0.145711	0.899473	0.80127	-8.40003	0.000237254	9.74236e-05	0.0965252	0.906932	0.809022	-8.43212	0.000584579	0.000284122	NA	NA	NA	NA	NA	NA	NA	NA	NA	NA	NA	NA	NA	NA	NA	NA	NA	NA
C10090_537	mmu_circ_0000166	mmu_circ_0000166	-0.572778	0.0244434	0.00794068	-0.0954688	0.28241	0.229846	0.447046	0.073343	0.0247946	0.788722	0.00218459	0.00121174	-0.116067	0.768728	0.53216	1.8923	5.98567e-41	6.5035e-43	-0.526374	0.0131753	0.00328832	1.75812	9.62372e-38	1.53017e-39	0.140884	0.349256	0.175453	0.149597	0.35207	0.167071
C10090_7153	mmu_circ_0000167	mmu_circ_0000167	-0.883895	0.234167	0.108781	-9.18859	5.60863e-07	1.29943e-07	-0.553737	0.577805	0.358194	-0.391888	0.397316	0.335162	9.15127	1.78916e-05	2.30176e-07	8.37069	0.00051964	0.000205704	-0.276245	0.78225	0.567082	-8.80607	0.000184502	6.3952e-05	-8.37069	0.00216973	0.000404838	NA	NA	NA
C10090_8740	mmu_circ_0000169	mmu_circ_0000169	NA	NA	NA	NA	NA	NA	NA	NA	NA	NA	NA	NA	8.21286	0.00247818	0.000348676	9.23338	1.2392e-06	2.1009e-07	8.2075	0.0053546	0.000860002	8.9431	5.16944e-05	1.40497e-05	-1.03961	0.149921	0.0583182	-8.9431	0.000259266	1.63798e-05
C10090_8665	mmu_circ_0000171	mmu_circ_0000171	0.419282	0.495734	0.299006	0.989447	0.0299322	0.0205404	0.39261	0.511678	0.29314	0.826072	0.0954013	0.0694992	-0.337106	0.521244	0.26951	-0.0185981	0.962958	0.951508	0.219574	0.743868	0.514866	0.406458	0.256409	0.193517	-0.477868	0.324728	0.157609	-0.520304	0.235327	0.0956398
C10090_15507	mmu_circ_0000172	mmu_circ_0000172	NA	NA	NA	NA	NA	NA	NA	NA	NA	8.35843	0.00282459	0.00163882	8.71528	0.000282015	1.24969e-05	8.23362	0.00099344	0.00044214	0.17139	0.921799	0.813794	0.485176	0.490013	0.40618	1.1617	0.0874451	0.0305872	0.345723	0.736748	0.526596
C10090_6387	mmu_circ_0000173	mmu_circ_0000173	-0.491113	0.468008	0.27552	0.445164	0.470288	0.406592	8.52865	0.00219972	0.000386206	9.48402	2.78749e-06	7.42718e-07	-0.401847	0.487387	0.24026	0.129803	0.754954	0.692428	-0.106373	0.888151	0.746804	0.196166	0.705388	0.63286	0.267003	0.616905	0.40855	-0.346581	0.631215	0.397746
C10090_2452	mmu_circ_0000174	mmu_circ_0000174	NA	NA	NA	8.29278	0.00211547	0.00113783	NA	NA	NA	NA	NA	NA	1.14226	0.0671493	0.0187585	-8.29278	0.00127408	0.000584804	9.32328	1.50053e-05	2.03706e-07	NA	NA	NA	NA	NA	NA	NA	NA	NA
C10090_13160	mmu_circ_0000175	mmu_circ_0000175	0.624483	0.303828	0.153011	1.00138	0.0494933	0.0349084	9.11348	0.000146451	7.45704e-06	9.75706	1.75588e-07	3.844e-08	-0.942366	0.0466541	0.0123947	-10.0296	1.70528e-10	1.42981e-11	0.035571	0.989087	0.97504	-9.75706	5.73827e-08	7.4572e-09	NA	NA	NA	NA	NA	NA
C10090_3629	mmu_circ_0000176	mmu_circ_0000176	8.30469	0.00310325	0.000689242	9.56567	2.93939e-07	6.49646e-08	NA	NA	NA	9.4227	4.79821e-06	1.34287e-06	-0.690078	0.27275	0.103931	-9.56567	1.05099e-07	1.3983e-08	-0.0450512	0.947114	0.863836	-9.4227	1.96297e-06	3.61632e-07	NA	NA	NA	NA	NA	NA
C10090_3088	mmu_circ_0000180	mmu_circ_0000180	-0.554535	0.442995	0.252852	1.23832	0.00243955	0.00136621	-1.28224	0.041483	0.0129389	0.373611	0.523722	0.459654	-0.310119	0.504258	0.25424	1.06755	9.72538e-06	2.15322e-06	0.460615	0.317971	0.131359	1.04167	0.000505847	0.000197535	-1.05278	0.00010532	4.82572e-06	-0.307532	0.391298	0.193066
C10090_15119	mmu_circ_0000185	mmu_circ_0000185	-0.408312	0.210515	0.0954276	-3.00534	2.28513e-17	1.84761e-18	0.433643	0.099601	0.0346414	-0.641913	0.0123897	0.0081044	1.14226	0.0671002	0.0187585	0.788569	0.19354	0.14216	-0.89307	0.0248203	0.00644872	-0.298962	0.445516	0.363912	-0.624791	0.440607	0.244134	-10.1237	1.54389e-09	1.49221e-11
C10090_5484	mmu_circ_0000186	mmu_circ_0000186	-8.64097	0.000686832	8.06848e-05	-0.0266261	0.791144	0.753316	-8.43212	0.00335337	0.000653132	-8.43212	0.000591541	0.000284122	-0.286116	0.812924	0.602098	-0.243654	0.749784	0.685688	8.79279	0.000463895	2.4028e-05	NA	NA	NA	-8.37069	0.00221744	0.000404838	NA	NA	NA
C10090_12698	mmu_circ_0000187	mmu_circ_0000187	0.670241	0.428098	0.2416	-8.26256	0.000486553	0.000222858	NA	NA	NA	NA	NA	NA	8.79766	0.000188318	6.42212e-06	10.0407	2.94859e-11	2.17608e-12	8.87067	0.000300347	1.32359e-05	10.7912	9.78346e-17	3.8578e-18	-1.58414	0.0025434	0.000485372	-1.14937	0.00276496	0.000498632
C10090_3378	mmu_circ_0000188	mmu_circ_0000188	0.0550259	0.82417	0.672216	-1.233	3.60179e-12	4.5161e-13	-0.113156	0.862421	0.734762	-1.36758	1.02054e-14	9.92472e-16	0.235034	0.527331	0.27438	-0.295722	0.297499	0.230168	0.00674131	0.975628	0.949954	-0.129354	0.661529	0.585096	0.0795894	0.899164	0.778752	0.0059768	0.992361	0.966394
C10090_9422	mmu_circ_0000191	mmu_circ_0000191	0.822396	0.0141989	0.00439226	-0.595572	0.0615498	0.0440562	0.0556883	0.850892	0.70079	-0.516179	0.0889432	0.0644814	0.398277	0.520185	0.268856	-0.355544	0.493704	0.413444	-0.0784608	0.898976	0.765294	-0.0433058	0.935924	0.910328	-0.587235	0.457162	0.256762	-0.0949374	0.889517	0.76475
C10090_6988	mmu_circ_0000209	mmu_circ_0000209	NA	NA	NA	9.35138	2.47212e-06	6.47328e-07	-8.43212	0.00321997	0.000653132	0.554571	0.512066	0.446382	0.183311	0.829275	0.646384	-0.0476002	0.937827	0.917448	0.279857	0.790016	0.581292	0.634624	0.223262	0.16495	0.522132	0.394523	0.206766	-0.22044	0.766895	0.57942
C10090_5549	mmu_circ_0000212	mmu_circ_0000212	0.00435607	0.992191	0.983164	0.959847	0.0977572	0.0719788	-0.65229	0.550869	0.327088	0.373731	0.656734	0.597924	-0.0354557	0.963399	0.917364	0.110718	0.812922	0.762094	0.0862434	0.957124	0.887958	0.26855	0.614157	0.537208	-0.302723	0.638405	0.433042	0.239331	0.770471	0.585754
C10090_15364	mmu_circ_0000213	mmu_circ_0000213	0.641875	0.325758	0.167717	4.86026	3.52164e-103	3.25208e-105	2.29947	3.68946e-12	1.6425e-14	4.7839	4.39713e-125	2.99914e-127	0.0698937	0.687333	0.429776	-0.796162	2.02787e-12	1.25131e-13	0.454843	5.08036e-07	2.75876e-09	-0.178224	0.0639667	0.0416726	-2.06245	1.49361e-27	2.82212e-30	-0.82798	1.66212e-13	9.01198e-16
C10090_5992	mmu_circ_0000214	mmu_circ_0000214	-0.0951501	0.888031	0.780384	0.650244	0.0713969	0.0514708	-0.111205	0.928338	0.861954	0.456167	0.21113	0.165002	0.259338	0.46302	0.222764	0.458125	0.0515703	0.033545	0.0561932	0.947408	0.867468	0.716176	0.00105125	0.000484282	0.112308	0.774497	0.59322	-0.299557	0.245849	0.101539
C10090_13579	mmu_circ_0000215	mmu_circ_0000215	NA	NA	NA	NA	NA	NA	NA	NA	NA	NA	NA	NA	NA	NA	NA	NA	NA	NA	NA	NA	NA	NA	NA	NA	8.45656	0.00182432	0.000298164	8.5263	0.0022799	0.000397182
C10090_2831	mmu_circ_0000218	mmu_circ_0000218	-8.26256	0.00288713	0.000705366	0.030217	0.873935	0.84524	NA	NA	NA	NA	NA	NA	-0.343247	0.803111	0.582038	-0.0591621	0.952321	0.937288	NA	NA	NA	NA	NA	NA	0.638286	0.489128	0.282456	8.2635	0.00605348	0.00147413
C10090_15515	mmu_circ_0000220	mmu_circ_0000220	NA	NA	NA	9.79507	1.96289e-08	3.6696e-09	NA	NA	NA	9.80607	9.9618e-08	2.12606e-08	-0.213112	0.782549	0.551476	1.20388	0.000145383	4.47058e-05	-0.59832	0.289383	0.116829	0.985178	0.00409283	0.0022603	0.427427	0.164198	0.065462	0.836609	0.00306377	0.000555408
C10090_16084	mmu_circ_0000226	mmu_circ_0000226	0.904728	0.0521769	0.0185419	-9.26256	2.60162e-07	5.68054e-08	-0.581834	0.51165	0.293978	-9.43233	3.87244e-07	9.03144e-08	NA	NA	NA	NA	NA	NA	NA	NA	NA	NA	NA	NA	NA	NA	NA	NA	NA	NA
C10090_4251	mmu_circ_0000229	mmu_circ_0000229	0.187286	0.726518	0.54066	1.37782	5.27594e-06	1.46488e-06	-0.296031	0.715157	0.508808	1.38736	4.39509e-06	1.20587e-06	0.197973	0.534445	0.282338	0.314374	0.137695	0.0977248	-0.480764	0.0531111	0.0149749	0.386524	0.0643195	0.041957	0.179342	0.537386	0.328854	0.175698	0.590013	0.357596
C10090_15764	mmu_circ_0000231	mmu_circ_0000231	0.103552	0.762053	0.588516	-0.502558	0.00817912	0.00530728	0.169313	0.373329	0.184587	-1.03349	4.44807e-07	1.04033e-07	-0.0798441	0.883603	0.735644	-1.28552	0.000133972	3.9906e-05	-0.0994906	0.810721	0.61566	-1.2165	0.000303393	0.000107477	-0.0398152	0.96563	0.909754	0.279495	0.701963	0.481214
C10090_12626	mmu_circ_0000233	mmu_circ_0000233	0.0652413	0.914877	0.827478	1.38002	1.234e-05	3.7681e-06	-0.607372	0.162999	0.0627234	0.599711	0.0496086	0.0346878	-0.476514	0.0903448	0.0262714	0.297827	0.183487	0.133572	0.188245	0.62305	0.373596	0.632861	0.00149374	0.000732462	-0.856877	0.000991434	0.000116143	-0.257253	0.285142	0.123212
C10090_4337	mmu_circ_0000234	mmu_circ_0000234	0.0749546	0.935821	0.86996	1.38192	0.00290531	0.00163718	-0.581834	0.512643	0.293978	1.13923	0.00745517	0.0047864	0.514855	0.159577	0.0521062	0.633489	0.0316763	0.0197798	0.68057	0.0266949	0.00699152	0.634719	0.0256087	0.0156682	-0.914209	0.00643337	0.00173826	0.0388549	0.970967	0.923128
C10090_10555	mmu_circ_0000239	mmu_circ_0000239	9.09329	6.62862e-05	3.38792e-06	10.0651	4.31831e-10	6.56652e-11	-8.81089	0.000703027	7.31586e-05	0.732139	0.25438	0.203784	0.235091	0.700532	0.442178	-0.4532	0.275761	0.210806	0.472104	0.443742	0.217886	-0.806292	0.144754	0.101423	0.0671812	0.950695	0.87772	0.728214	0.334612	0.156105
C10090_3827	mmu_circ_0000240	mmu_circ_0000240	-0.0951572	0.933225	0.870044	0.615132	0.369841	0.310566	-8.81089	0.000688304	7.31586e-05	0.611803	0.377292	0.315448	-0.0798782	0.935023	0.835926	1.95677	1.61281e-10	1.33905e-11	-0.407559	0.575974	0.324316	2.19858	2.06961e-12	1.34698e-13	-0.318679	0.313246	0.150186	-0.287559	0.339542	0.159766
C10090_10954	mmu_circ_0000241	mmu_circ_0000241	NA	NA	NA	8.16692	0.00350821	0.00202156	NA	NA	NA	NA	NA	NA	-8.16692	0.0027366	0.000348152	0.0667034	0.929042	0.906378	NA	NA	NA	NA	NA	NA	-8.23362	0.00367702	0.000822422	8.64169	0.00154515	0.000206166
C10090_13330	mmu_circ_0000242	mmu_circ_0000242	NA	NA	NA	NA	NA	NA	NA	NA	NA	NA	NA	NA	NA	NA	NA	NA	NA	NA	NA	NA	NA	8.62132	0.000344096	0.000129993	NA	NA	NA	-0.357815	0.756592	0.548092
C10090_12247	mmu_circ_0000244	mmu_circ_0000244	NA	NA	NA	NA	NA	NA	NA	NA	NA	NA	NA	NA	NA	NA	NA	NA	NA	NA	7.94486	0.0123364	0.00283418	NA	NA	NA	NA	NA	NA	NA	NA	NA
C10090_14552	mmu_circ_0000246	mmu_circ_0000246	-1.54283	0.00531681	0.00154368	0.790818	0.0550941	0.0390848	-0.16675	0.882729	0.76459	0.508665	0.240842	0.192144	-0.255721	0.6025	0.342282	-0.868838	0.0107895	0.00632816	0.164177	0.78793	0.574162	-1.67005	3.80775e-05	1.01551e-05	-0.142886	0.843237	0.702432	0.762833	0.234668	0.0953164
C10090_4954	mmu_circ_0000248	mmu_circ_0000248	0.237403	0.702195	0.510158	-0.817965	0.0410579	0.028647	-0.488646	0.601224	0.380742	-0.626267	0.181674	0.140023	-0.249539	0.819955	0.615008	-8.87744	5.13521e-05	1.36749e-05	0.816718	0.207004	0.075789	-0.310211	0.679623	0.602396	NA	NA	NA	-0.0949756	0.935729	0.85323
C10090_10755	mmu_circ_0000254	mmu_circ_0000254	-8.52552	0.00112934	0.000166213	-8.52552	0.00011372	4.25894e-05	-8.43212	0.00324669	0.000653132	0.715081	0.344068	0.285096	NA	NA	NA	8.99887	9.82277e-06	2.08618e-06	-0.717171	0.34359	0.14553	-0.410465	0.523175	0.440434	0.120847	0.90634	0.815578	-0.0950496	0.932141	0.841388
C10090_11530	mmu_circ_0000256	mmu_circ_0000256	-0.284247	0.00451841	0.00117646	-0.325621	1.61062e-07	3.3746e-08	-0.202215	0.268246	0.116807	-0.638021	9.18756e-14	9.6626e-15	-0.0483033	0.785575	0.560346	0.206293	0.0253042	0.0156038	0.289106	0.0146993	0.0036779	0.680465	3.88091e-12	2.6328e-13	-0.343967	0.000776221	8.23154e-05	-0.332354	0.00081753	8.22926e-05
C10090_7029	mmu_circ_0000257	mmu_circ_0000257	-0.510264	0.13176	0.05391	-0.472203	0.0233139	0.0157738	-0.371815	0.371675	0.183563	-0.971601	7.71582e-05	2.80282e-05	-0.395886	0.357296	0.15198	-0.0264906	0.941535	0.921268	0.375754	0.394648	0.17746	-0.085152	0.83435	0.783762	-0.740103	0.0611247	0.0203412	-0.0610411	0.918216	0.804792
C10090_2936	mmu_circ_0000260	mmu_circ_0000260	-0.129757	0.649648	0.451816	-0.385922	0.00234245	0.00130799	-0.00359253	0.856784	0.723522	-0.592822	0.000366562	0.000161626	0.0984867	0.776959	0.543094	1.00576	3.98419e-11	3.0057e-12	0.321742	0.234034	0.0883738	1.58332	6.43651e-24	1.69202e-25	-0.0180759	0.932407	0.852688	-0.134358	0.413258	0.209454
C10090_9584	mmu_circ_0000261	mmu_circ_0000261	NA	NA	NA	8.29278	0.00212601	0.00113783	NA	NA	NA	9.2211	2.52617e-05	7.93702e-06	-0.343247	0.804471	0.582038	-0.0591621	0.952519	0.937288	-0.276538	0.740617	0.511224	0.622503	0.192607	0.139933	1.33851	0.03281	0.0100352	-0.654277	0.275352	0.117424
C10090_387	mmu_circ_0000262	mmu_circ_0000262	-0.202121	0.856143	0.730826	-0.232946	0.553875	0.493066	8.26538	0.00593331	0.00143958	8.9867	0.000127444	4.69118e-05	-0.0798661	0.952738	0.879974	-0.0186567	0.989561	0.984692	0.221051	0.847606	0.67589	0.50916	0.350932	0.27527	1.01945	0.115335	0.0423314	-0.162252	0.853701	0.685456
C10090_3115	mmu_circ_0000263	mmu_circ_0000263	NA	NA	NA	9.7077	5.84333e-08	1.15835e-08	NA	NA	NA	9.2211	2.49991e-05	7.93702e-06	0.727445	0.0763904	0.0216676	-9.7077	1.83633e-08	2.13824e-09	0.208931	0.843574	0.66827	-9.2211	1.13674e-05	2.51832e-06	8.19377	0.0046859	0.00115653	8.64169	0.00154243	0.000206166
C10090_11832	mmu_circ_0000266	mmu_circ_0000266	NA	NA	NA	8.79507	0.00016389	6.42714e-05	NA	NA	NA	NA	NA	NA	-0.707603	0.439206	0.205746	-8.79507	8.90379e-05	2.55724e-05	7.94486	0.0124725	0.00283418	NA	NA	NA	NA	NA	NA	NA	NA	NA
C10090_9988	mmu_circ_0000268	mmu_circ_0000268	9.16742	4.14956e-05	1.74333e-06	10.1	2.48417e-10	3.69592e-11	NA	NA	NA	9.1472	4.2741e-05	1.43504e-05	-0.887387	0.0548675	0.0148121	-10.1	5.31855e-11	4.08868e-12	0.119347	0.932868	0.835256	-0.110757	0.870244	0.831132	9.45677	4.26052e-06	8.7545e-08	-9.03645	0.000156885	7.87752e-06
C10090_3625	mmu_circ_0000273	mmu_circ_0000273	-0.754242	0.17798	0.0774404	-1.23319	0.00343894	0.00204586	-0.925639	0.209848	0.085364	-0.500809	0.238995	0.190249	-0.0798443	0.950965	0.876006	1.50654	0.000854805	0.00036274	-0.276257	0.756297	0.532314	1.45911	0.000376449	0.000145328	-0.0792267	0.897668	0.802686	-0.0948886	0.85354	0.715106
C10090_11348	mmu_circ_0000277	mmu_circ_0000277	8.16742	0.00467807	0.00133945	NA	NA	NA	NA	NA	NA	NA	NA	NA	NA	NA	NA	NA	NA	NA	NA	NA	NA	NA	NA	NA	8.45656	0.00187582	0.000298164	NA	NA	NA
C10090_4820	mmu_circ_0000281	mmu_circ_0000281	-0.589896	0.298931	0.149745	0.48521	0.348882	0.289458	0.511396	0.27102	0.118618	0.571198	0.244175	0.194856	0.00259594	0.998185	0.996554	0.681208	0.0165332	0.009924	-0.0879689	0.871647	0.71636	0.492285	0.133905	0.0932538	0.0199809	0.969779	0.951684	0.123638	0.853475	0.687086
C10090_14023	mmu_circ_0000282	mmu_circ_0000282	0.267353	0.443021	0.252274	0.328906	0.472229	0.40953	0.0291646	0.86217	0.733348	0.0948405	0.987513	0.985558	-0.35221	0.28775	0.11235	0.074057	0.791823	0.738256	-0.00634184	0.968499	0.909434	0.407249	0.123287	0.085049	0.505096	0.042549	0.0133657	0.205714	0.609525	0.376894
C10090_2059	mmu_circ_0000283	mmu_circ_0000283	-0.258695	0.577949	0.377824	-0.647936	0.0116458	0.00765954	-0.242576	0.77212	0.586502	-0.139068	0.523919	0.459942	0.335144	0.509379	0.257862	0.940764	0.0014979	0.000713328	-0.174531	0.757107	0.532094	0.686567	0.0292379	0.0180993	0.0404479	0.95476	0.88463	-0.168954	0.705305	0.489324
C10090_11303	mmu_circ_0000284	mmu_circ_0000284	NA	NA	NA	NA	NA	NA	NA	NA	NA	8.2211	0.00483732	0.00296306	NA	NA	NA	NA	NA	NA	-8.2211	0.00232522	0.000300122	-8.2211	0.00305812	0.00162404	NA	NA	NA	NA	NA	NA
C10090_713	mmu_circ_0000285	mmu_circ_0000285	NA	NA	NA	8.79507	0.000165711	6.42714e-05	NA	NA	NA	NA	NA	NA	-0.260568	0.817002	0.611292	-8.79507	8.98719e-05	2.55724e-05	8.32328	0.00335043	0.000473734	NA	NA	NA	NA	NA	NA	NA	NA	NA
C10090_9677	mmu_circ_0000286	mmu_circ_0000286	-0.128329	0.850701	0.703416	2.0287	4.46997e-18	3.44902e-19	0.231772	0.53088	0.309754	1.85287	9.48911e-15	9.20726e-16	0.087786	0.76046	0.523486	0.809171	1.78811e-09	1.7192e-10	-0.260803	0.179249	0.0626696	0.917393	3.67006e-11	2.81654e-12	-0.166451	0.298785	0.140854	-0.0500091	0.767668	0.56625
C10090_10114	mmu_circ_0000287	mmu_circ_0000287	0.409021	0.000897764	0.000120599	-2.65133	1.60901e-53	3.16982e-55	-0.448492	0.00280855	0.000519668	-3.46506	4.53653e-84	5.0905e-86	0.161209	0.780459	0.546656	0.551824	0.0523386	0.0340662	0.271132	0.657042	0.407152	1.46655	1.15526e-07	1.5993e-08	0.3856	0.221823	0.0945654	0.172952	0.657708	0.426068
C10090_11604	mmu_circ_0000290	mmu_circ_0000290	NA	NA	NA	NA	NA	NA	NA	NA	NA	NA	NA	NA	8.43505	0.001061	9.20818e-05	NA	NA	NA	NA	NA	NA	8.35843	0.00120861	0.000572918	NA	NA	NA	-8.35843	0.00331785	0.000636664
C10090_7301	mmu_circ_0000294	mmu_circ_0000294	NA	NA	NA	12.5342	1.29883e-55	2.45214e-57	8.64422	0.00141243	0.000200036	12.2211	2.73809e-40	7.77148e-42	-0.105507	0.694053	0.435962	-1.2304	2.55791e-11	1.87727e-12	0.504974	0.00389287	0.000612224	-1.97528	8.55788e-16	3.5741e-17	0.309456	0.310023	0.148056	0.450482	0.33738	0.15851
C10090_8879	mmu_circ_0000295	mmu_circ_0000295	NA	NA	NA	8.40812	0.00127222	0.00064042	NA	NA	NA	8.35843	0.00290955	0.00163882	0.467478	0.637897	0.37659	0.410145	0.533507	0.454214	0.0716029	0.97724	0.949686	0	0.993439	0.99028	-8.81826	0.000327827	2.37702e-05	0.390432	0.755209	0.544064
C10090_8934	mmu_circ_0000298	mmu_circ_0000298	0.14584	0.80392	0.651182	0.767058	0.0530244	0.037573	-0.875217	0.0140796	0.0040429	-0.346604	0.110879	0.0818724	0.562254	0.0482778	0.012905	-0.348714	0.274925	0.209998	0.202233	0.699128	0.453966	-0.401207	0.224718	0.166216	0.249782	0.610313	0.401446	0.185115	0.77009	0.577114
C10090_12593	mmu_circ_0000299	mmu_circ_0000299	NA	NA	NA	8.40812	0.00125081	0.00064042	NA	NA	NA	8.35843	0.00286368	0.00163882	-0.195256	0.884464	0.734916	-8.40812	0.000753322	0.000312726	0.512242	0.631828	0.382686	-8.35843	0.0016955	0.000850448	NA	NA	NA	NA	NA	NA
C10090_9783	mmu_circ_0000300	mmu_circ_0000300	NA	NA	NA	8.40812	0.00126449	0.00064042	NA	NA	NA	NA	NA	NA	-8.40812	0.00109473	8.22666e-05	-8.40812	0.000763502	0.000312726	NA	NA	NA	NA	NA	NA	NA	NA	NA	NA	NA	NA
C10090_12112	mmu_circ_0000302	mmu_circ_0000302	NA	NA	NA	NA	NA	NA	NA	NA	NA	NA	NA	NA	NA	NA	NA	NA	NA	NA	NA	NA	NA	8.62132	0.00034487	0.000129993	8.45656	0.00185924	0.000298164	-0.0950157	0.932962	0.847188
C10090_2380	mmu_circ_0000303	mmu_circ_0000303	8.16742	0.00477627	0.00133945	NA	NA	NA	8.52865	0.00219624	0.000386206	NA	NA	NA	NA	NA	NA	NA	NA	NA	NA	NA	NA	NA	NA	NA	NA	NA	NA	NA	NA	NA
C10090_13317	mmu_circ_0000304	mmu_circ_0000304	8.16742	0.0049122	0.00133945	NA	NA	NA	NA	NA	NA	NA	NA	NA	NA	NA	NA	8.23362	0.00100408	0.00044214	NA	NA	NA	9.35821	1.91199e-06	3.4454e-07	-8.23362	0.00359353	0.000822422	-9.35821	1.59611e-05	4.21414e-07
C10090_15511	mmu_circ_0000306	mmu_circ_0000306	NA	NA	NA	NA	NA	NA	NA	NA	NA	NA	NA	NA	NA	NA	NA	8.61176	0.00014538	4.4526e-05	NA	NA	NA	NA	NA	NA	-8.61176	0.000851116	9.80974e-05	8.5263	0.00222863	0.000397182
C10090_9332	mmu_circ_0000309	mmu_circ_0000309	NA	NA	NA	NA	NA	NA	NA	NA	NA	NA	NA	NA	NA	NA	NA	NA	NA	NA	NA	NA	NA	NA	NA	NA	8.67913	0.000793813	7.6869e-05	NA	NA	NA
C10090_3443	mmu_circ_0000311	mmu_circ_0000311	NA	NA	NA	8.16692	0.00349576	0.00202156	NA	NA	NA	NA	NA	NA	-8.16692	0.0027019	0.000348152	-8.16692	0.0022126	0.0010936	NA	NA	NA	NA	NA	NA	NA	NA	NA	NA	NA	NA
C10090_12500	mmu_circ_0000313	mmu_circ_0000313	NA	NA	NA	NA	NA	NA	NA	NA	NA	NA	NA	NA	NA	NA	NA	8.49625	0.000274291	9.57038e-05	NA	NA	NA	9.28425	3.65686e-06	7.2331e-07	-8.49625	0.00140862	0.000199283	-0.535382	0.501926	0.279834
C10090_5825	mmu_circ_0000325	mmu_circ_0000325	-0.935684	0.00296313	0.000605788	-0.107441	0.34942	0.29012	-0.195338	0.818275	0.643646	-0.526154	0.0549915	0.0387784	-0.132281	0.784846	0.554216	-0.144072	0.620724	0.54132	0.723602	0.0355033	0.00958766	1.13719	7.70113e-05	2.2514e-05	0.0244146	0.969128	0.939372	-0.475233	0.120885	0.0418338
C10090_10976	mmu_circ_0000326	mmu_circ_0000326	NA	NA	NA	8.02956	0.00583412	0.0035917	NA	NA	NA	NA	NA	NA	0.183298	0.90298	0.778698	-8.02956	0.00382801	0.00204506	NA	NA	NA	NA	NA	NA	NA	NA	NA	NA	NA	NA
C10090_12137	mmu_circ_0000330	mmu_circ_0000330	-0.220827	0.861837	0.728076	0.088821	0.928801	0.915078	NA	NA	NA	9.2914	1.44683e-05	4.38984e-06	0.598276	0.447593	0.21132	0.203921	0.757605	0.696102	-0.581283	0.418894	0.200348	-0.3483	0.570255	0.48575	-0.0395284	0.970336	0.930688	0.085634	0.957746	0.89927
C10090_11315	mmu_circ_0000331	mmu_circ_0000331	8.16742	0.00468244	0.00133945	NA	NA	NA	NA	NA	NA	NA	NA	NA	NA	NA	NA	NA	NA	NA	8.32328	0.00324034	0.000473734	NA	NA	NA	NA	NA	NA	NA	NA	NA
C10090_2867	mmu_circ_0000339	mmu_circ_0000339	NA	NA	NA	NA	NA	NA	-8.43212	0.00323327	0.000653132	-8.43212	0.000600621	0.000284122	NA	NA	NA	NA	NA	NA	NA	NA	NA	NA	NA	NA	NA	NA	NA	NA	NA	NA
C10090_4490	mmu_circ_0000340	mmu_circ_0000340	-0.30674	0.705833	0.514312	0.0624768	0.877404	0.850396	0.0557534	0.912801	0.806384	0.828348	0.104326	0.0766664	0.335159	0.628664	0.366774	0.493293	0.250129	0.189058	-0.441544	0.401732	0.181316	0.137135	0.742274	0.680746	0.470574	0.32272	0.156101	-0.0950276	0.8715	0.74022
C10090_3888	mmu_circ_0000342	mmu_circ_0000342	0.243652	0.645307	0.446552	-0.232979	0.352116	0.292792	-0.592044	0.236542	0.0997768	-0.858914	0.00637882	0.00407992	-0.0797899	0.925381	0.816724	-0.128664	0.788889	0.734226	-0.138955	0.835194	0.657096	0.815253	0.023284	0.0141817	0.0127266	0.9921	0.986476	-0.431989	0.329843	0.153025
C10090_5168	mmu_circ_0000344	mmu_circ_0000344	0.982672	0.0411103	0.0140921	0.989391	0.0462008	0.0325008	-0.313566	0.713264	0.505278	0.56247	0.199432	0.155377	0.572155	0.138452	0.0437098	-0.7291	0.077763	0.052384	-0.544929	0.160432	0.0547172	-1.59063	0.000106642	3.40026e-05	-0.499	0.494385	0.290162	-9.03645	0.000149181	7.87752e-06
C10090_11729	mmu_circ_0000345	mmu_circ_0000345	NA	NA	NA	NA	NA	NA	NA	NA	NA	NA	NA	NA	NA	NA	NA	9.43505	1.54037e-07	2.11572e-08	NA	NA	NA	8.73674	0.000186514	6.19208e-05	-0.978485	0.137335	0.0528062	-8.73674	0.000736309	7.0819e-05
C10090_984	mmu_circ_0000346	mmu_circ_0000346	-0.247243	0.726148	0.537664	0.107977	0.943977	0.930998	-1.32416	0.0231912	0.00695608	-0.0248384	0.775533	0.730656	0.098557	0.892622	0.764662	-0.722125	0.0984315	0.0676792	0.202774	0.795022	0.586802	-0.447685	0.337041	0.263588	0.767606	0.148443	0.0577084	-0.162252	0.8532	0.685456
C10090_8810	mmu_circ_0000347	mmu_circ_0000347	NA	NA	NA	NA	NA	NA	NA	NA	NA	8.2211	0.00493301	0.00296306	NA	NA	NA	NA	NA	NA	-0.276245	0.82451	0.636292	-8.2211	0.00311027	0.00162404	NA	NA	NA	NA	NA	NA
C10090_6539	mmu_circ_0000349	mmu_circ_0000349	8.16742	0.00476717	0.00133945	NA	NA	NA	-0.447079	0.67419	0.462966	-9.19795	3.71145e-06	1.01177e-06	NA	NA	NA	NA	NA	NA	NA	NA	NA	NA	NA	NA	NA	NA	NA	NA	NA	NA
C10090_14351	mmu_circ_0000350	mmu_circ_0000350	NA	NA	NA	NA	NA	NA	8.52865	0.00221729	0.000386206	NA	NA	NA	NA	NA	NA	NA	NA	NA	NA	NA	NA	NA	NA	NA	NA	NA	NA	NA	NA	NA
C10090_6751	mmu_circ_0000351	mmu_circ_0000351	-0.258695	0.577712	0.377824	-2.45516	4.54972e-10	6.94642e-11	0.076122	0.772108	0.586278	-1.3108	2.96528e-05	9.58414e-06	1.24191	0.0360572	0.00927754	-8.29278	0.00124734	0.000584804	-0.69136	0.230831	0.0864892	-0.582633	0.254122	0.191682	NA	NA	NA	-0.482172	0.582263	0.351664
C10090_12588	mmu_circ_0000352	mmu_circ_0000352	-0.0951466	0.942142	0.892476	-8.26256	0.000487427	0.000222858	NA	NA	NA	NA	NA	NA	NA	NA	NA	NA	NA	NA	NA	NA	NA	NA	NA	NA	NA	NA	NA	NA	NA	NA
C10090_2642	mmu_circ_0000358	mmu_circ_0000358	NA	NA	NA	8.40812	0.00126143	0.00064042	NA	NA	NA	NA	NA	NA	-8.40812	0.00108005	8.22666e-05	0.0881372	0.898793	0.870786	8.52982	0.00145513	0.00014375	NA	NA	NA	-8.49625	0.00143011	0.000199283	NA	NA	NA
C10090_10006	mmu_circ_0000359	mmu_circ_0000359	0.319969	0.736899	0.559428	-8.52552	0.000113907	4.25894e-05	NA	NA	NA	NA	NA	NA	NA	NA	NA	NA	NA	NA	NA	NA	NA	NA	NA	NA	NA	NA	NA	NA	NA	NA
C10090_2325	mmu_circ_0000367	mmu_circ_0000367	0.594428	0.155197	0.0654512	1.58097	5.01437e-07	1.13294e-07	0.533774	0.167667	0.0647528	0.312343	0.590076	0.527238	-0.581194	0.0258575	0.00643666	2.12218	2.71779e-50	2.11718e-52	0.592371	0.0946972	0.0289748	3.23934	8.77928e-76	5.95584e-78	0.46611	2.02619e-05	5.69478e-07	0.374732	0.00117095	0.000149888
C10090_9762	mmu_circ_0000368	mmu_circ_0000368	-0.02307	0.984327	0.967206	0.940991	0.00482952	0.00290584	0.0600448	0.839109	0.672408	0.342678	0.43743	0.37362	-0.409985	0.212205	0.0752272	2.5126	2.36503e-65	9.6967e-68	0.15423	0.777162	0.56031	2.6061	1.66091e-58	1.69014e-60	0.329116	0.00218749	0.000412802	0.500044	1.14789e-05	2.78718e-07
C10090_8488	mmu_circ_0000369	mmu_circ_0000369	0.189513	0.646843	0.448134	-1.49073	6.71788e-06	1.91073e-06	-0.781424	0.0801653	0.0272794	-1.18208	0.000462941	0.000205344	0.254608	0.770098	0.534838	0.487654	0.298868	0.23135	0.472104	0.443931	0.217886	0.351331	0.455533	0.372674	0.240402	0.72092	0.527324	0.00121222	0.991761	0.965342
C10090_7441	mmu_circ_0000371	mmu_circ_0000371	NA	NA	NA	NA	NA	NA	NA	NA	NA	NA	NA	NA	NA	NA	NA	NA	NA	NA	NA	NA	NA	NA	NA	NA	NA	NA	NA	8.64169	0.00149497	0.000206166
C10090_15802	mmu_circ_0000372	mmu_circ_0000372	NA	NA	NA	8.29278	0.00205433	0.00113783	NA	NA	NA	8.80607	0.000349373	0.000153355	0.335117	0.784598	0.554522	0.706091	0.25698	0.194921	-0.0132759	0.974257	0.932544	-8.80607	0.00018394	6.3952e-05	-0.805101	0.326246	0.159116	8.74886	0.000991176	0.000107015
C10090_13117	mmu_circ_0000373	mmu_circ_0000373	-0.811292	0.218415	0.100236	1.88735	3.03054e-08	5.77128e-09	9.58759	4.5429e-06	7.45774e-08	10.7065	4.28661e-14	4.36678e-15	-0.231837	0.519423	0.267826	-0.440025	0.0807987	0.0546112	0.273786	0.562035	0.311772	0.13719	0.688848	0.613932	0.604184	0.0295816	0.00894994	0.540613	0.0976418	0.0327314
C10090_5957	mmu_circ_0000374	mmu_circ_0000374	-0.416918	0.667147	0.47077	1.14571	0.0263931	0.0179818	0.0260165	0.935796	0.875388	-0.211002	0.623544	0.563042	0.2785	0.633041	0.370362	-0.91173	0.0377183	0.0238388	0.774122	0.273284	0.107818	-8.70667	0.000335504	0.000122124	-0.749985	0.344424	0.172131	NA	NA	NA
C10090_10313	mmu_circ_0000375	mmu_circ_0000375	-0.222446	0.173905	0.0753416	-1.15101	4.48375e-20	3.16522e-21	-0.951277	7.24907e-09	5.24418e-11	-1.64908	1.0464e-29	4.37438e-31	-0.0448949	0.901677	0.774628	0.562455	0.000503721	0.00019269	0.642704	0.00183002	0.00019378	1.26274	5.38056e-14	2.80606e-15	0.350979	0.0293502	0.00884528	0.386161	0.00859085	0.00226416
C10090_3111	mmu_circ_0000376	mmu_circ_0000376	-0.181504	0.500702	0.305486	-1.40053	1.36338e-13	1.5472e-14	-0.751668	0.00251002	0.000462336	-1.4227	2.38081e-11	3.20584e-12	0.02105	0.974571	0.93437	0.940748	5.21085e-05	1.409e-05	0.0403969	0.975607	0.940356	0.779966	0.00248405	0.00127441	-0.103818	0.757474	0.571594	0.184223	0.64849	0.415816
C10090_18	mmu_circ_0000377	mmu_circ_0000377	-0.400126	0.429467	0.242832	-1.92481	3.63766e-06	9.76414e-07	-0.460476	0.467495	0.25521	-10.3583	4.08769e-13	4.56886e-14	-0.320655	0.80833	0.589782	-8.40812	0.000770054	0.000312726	NA	NA	NA	NA	NA	NA	NA	NA	NA	NA	NA	NA
C10090_15111	mmu_circ_0000384	mmu_circ_0000384	-0.193118	0.684271	0.49329	-0.771361	0.00284466	0.00160125	-1.13362	0.0132631	0.00379368	-0.73057	0.0223579	0.0150381	-0.114733	0.883394	0.715446	-0.188613	0.655531	0.581082	-0.0957764	0.885519	0.742186	-0.0693261	0.898595	0.864686	0.483928	0.312848	0.149922	0.414023	0.507953	0.284152
C10090_7856	mmu_circ_0000385	mmu_circ_0000385	0.489649	0.414461	0.232462	0.303109	0.748202	0.702908	0.940149	0.10122	0.0353736	0.547758	0.451225	0.386594	-0.0309814	0.972118	0.93043	0.515677	0.20752	0.153109	0.0713831	0.97016	0.912818	-0.322203	0.5911	0.50689	0.216712	0.713199	0.519992	1.03421	0.0543778	0.0169338
C10090_5515	mmu_circ_0000387	mmu_circ_0000387	-0.943196	0.21733	0.099331	0.297504	0.771093	0.729318	0.132794	0.858134	0.727528	0.258154	0.820113	0.780776	0.173836	0.837912	0.657394	-0.496725	0.356726	0.28345	0.197505	0.866476	0.705776	0.215199	0.717852	0.648608	0.419749	0.599473	0.387944	0.0493569	0.982576	0.947368
C10090_10790	mmu_circ_0000390	mmu_circ_0000390	9.16742	4.09736e-05	1.74333e-06	8.95565	5.82608e-05	2.03608e-05	-0.788116	0.335256	0.157927	0.274163	0.741429	0.691348	-0.157988	0.874759	0.738106	0.1257	0.833044	0.787276	-0.69136	0.231088	0.0864892	-0.582633	0.254193	0.191682	0.038369	0.967486	0.947606	-0.597559	0.4797	0.261562
C10090_9365	mmu_circ_0000393	mmu_circ_0000393	-0.0248767	0.987658	0.971272	1.65451	2.03656e-05	6.30234e-06	9.19155	8.62203e-05	3.8624e-06	10.6805	7.60257e-14	7.8953e-15	-0.201798	0.666999	0.403986	-1.25067	0.00016042	5.13028e-05	0.0919442	0.911416	0.785592	-0.786172	0.0263137	0.0161218	-0.0942698	0.89922	0.802374	0.294967	0.661166	0.437504
C10090_13672	mmu_circ_0000397	mmu_circ_0000397	0.449181	0.198325	0.0884688	-2.1174	1.38909e-07	2.89904e-08	0.171421	0.601632	0.379996	-10.8383	3.39146e-18	2.5893e-19	-8.40812	0.00103563	8.22666e-05	-8.40812	0.00074962	0.000312726	NA	NA	NA	NA	NA	NA	NA	NA	NA	NA	NA	NA
C10090_193	mmu_circ_0000402	mmu_circ_0000402	NA	NA	NA	NA	NA	NA	NA	NA	NA	NA	NA	NA	8.08746	0.00428719	0.000678492	NA	NA	NA	NA	NA	NA	NA	NA	NA	NA	NA	NA	NA	NA	NA
C10090_5593	mmu_circ_0000403	mmu_circ_0000403	0.267353	0.704707	0.514434	0.929281	0.0470661	0.0331578	0.273882	0.721407	0.518072	1.22941	0.0145487	0.0095871	0.120412	0.858683	0.680704	-0.102846	0.798502	0.745792	0.541785	0.202324	0.0735684	-0.587127	0.172139	0.123639	-0.702602	0.149789	0.0585146	-0.448554	0.537458	0.308006
C10090_2467	mmu_circ_0000404	mmu_circ_0000404	NA	NA	NA	8.16692	0.00351447	0.00202156	NA	NA	NA	NA	NA	NA	0.0459449	0.980561	0.947522	-8.16692	0.00222552	0.0010936	NA	NA	NA	NA	NA	NA	NA	NA	NA	NA	NA	NA
C10090_16009	mmu_circ_0000405	mmu_circ_0000405	-0.258779	0.722702	0.533372	0.385888	0.542863	0.48148	0.220326	0.781443	0.60576	1.51452	0.00184137	0.00101569	0.0174843	0.985046	0.958896	-0.222521	0.593124	0.512144	-0.00225052	0.975366	0.934828	0.103256	0.798295	0.7394	0.514978	0.269771	0.123162	0.0672807	0.939157	0.86986
C10090_7769	mmu_circ_0000410	mmu_circ_0000410	NA	NA	NA	8.02956	0.00564228	0.0035917	NA	NA	NA	NA	NA	NA	-8.02956	0.00366486	0.000716208	0.881829	0.177199	0.128595	7.94486	0.0115588	0.00283418	8.73674	0.000183698	6.19208e-05	-0.0394868	0.970473	0.928528	-0.210437	0.839358	0.695112
C10090_10141	mmu_circ_0000413	mmu_circ_0000413	NA	NA	NA	8.40812	0.00126245	0.00064042	NA	NA	NA	NA	NA	NA	0.219781	0.87051	0.694168	-8.40812	0.000761977	0.000312726	7.94486	0.012814	0.00283418	8.84361	9.83243e-05	2.94952e-05	8.45656	0.00190987	0.000298164	0.00470291	0.995928	0.977146
C10090_3179	mmu_circ_0000414	mmu_circ_0000414	NA	NA	NA	8.02956	0.00581087	0.0035917	NA	NA	NA	9.2211	2.49818e-05	7.93702e-06	1.29866	0.0465949	0.012398	-8.02956	0.00381338	0.00204506	-0.691283	0.345968	0.147477	-9.2211	1.13565e-05	2.51832e-06	NA	NA	NA	NA	NA	NA
C10090_864	mmu_circ_0000420	mmu_circ_0000420	-0.0951988	0.930003	0.85833	0.59709	0.34215	0.283522	-0.166844	0.930905	0.861748	1.88393	0.000128555	4.8933e-05	0.534755	0.270749	0.102948	-0.152348	0.759113	0.698266	-0.307471	0.512841	0.273772	-0.373101	0.330305	0.25776	0.360822	0.5677	0.356388	-0.817415	0.116042	0.0398296
C10090_6254	mmu_circ_0000421	mmu_circ_0000421	-0.384703	0.516288	0.31914	0.810078	0.0363009	0.0252162	-0.166727	0.892679	0.778176	1.18569	0.00057149	0.000255756	0.340515	0.340778	0.141823	-0.102276	0.756969	0.694742	-0.332247	0.314689	0.129543	-0.359234	0.21053	0.154383	0.011892	0.98919	0.981714	-0.0693927	0.882364	0.752984
C10090_4477	mmu_circ_0000423	mmu_circ_0000423	-8.84737	0.000261215	1.90127e-05	0.904675	0.113695	0.0848804	8.75087	0.000954804	0.00010361	9.35865	8.30955e-06	2.42796e-06	-0.217354	0.782439	0.54996	0.36884	0.359822	0.287902	0.351639	0.659782	0.409952	0.321532	0.527774	0.445984	0.0727627	0.921947	0.839856	0.0685123	0.957173	0.899634
C10090_2496	mmu_circ_0000425	mmu_circ_0000425	0.659824	0.28566	0.141416	2.24293	3.40487e-09	5.77842e-10	0.231853	0.689329	0.477198	1.91426	1.74138e-08	3.21456e-09	0.386895	0.163811	0.0537896	-0.10197	0.722598	0.652382	-0.0284825	0.919758	0.80911	-0.666415	0.00983391	0.0057123	0.182674	0.647889	0.44529	0.123638	0.853725	0.687086
C10090_237	mmu_circ_0000427	mmu_circ_0000427	0.0651032	0.938	0.881022	1.13886	0.018209	0.0122153	-9.6339	3.18081e-06	4.95618e-08	0.788792	0.081828	0.058999	-0.217361	0.738548	0.489852	1.63923	9.63655e-11	7.78352e-12	-0.590438	0.160923	0.0549518	1.34155	2.6314e-07	3.93846e-08	-0.0641267	0.851774	0.71236	0.316668	0.250946	0.104117
C10090_3476	mmu_circ_0000430	mmu_circ_0000430	0.145711	0.859654	0.7145	1.45733	0.000168219	6.69702e-05	-0.341872	0.650461	0.43346	0.274108	0.649482	0.589464	0.0741911	0.885949	0.757498	-0.11303	0.726229	0.658192	0.448781	0.257135	0.0995136	0.077135	0.839732	0.79131	-0.257896	0.560956	0.350432	0.105311	0.885085	0.759062
C10090_7924	mmu_circ_0000436	mmu_circ_0000436	0.106437	0.768663	0.597118	0.186591	0.840248	0.806624	-0.660506	0.0762908	0.0258548	-0.675895	0.00577061	0.0036744	-0.361899	0.22406	0.0806196	-2.14532	1.24911e-11	8.62958e-13	0.327641	0.480082	0.242648	-1.04718	0.00625795	0.00355152	0.152984	0.868789	0.73685	-0.46712	0.52951	0.301828
C10090_14592	mmu_circ_0000440	mmu_circ_0000440	-0.273876	0.378222	0.205254	0.438103	0.122192	0.0914746	0.12104	0.62947	0.409138	0.416758	0.169621	0.1298	0.445238	0.0098467	0.00229428	-0.359289	0.0614701	0.040665	0.177503	0.611615	0.363418	0.849684	1.56958e-06	2.74852e-07	0.108411	0.769786	0.585794	-0.78342	3.53241e-05	1.2241e-06
C10090_11960	mmu_circ_0000450	mmu_circ_0000450	-0.0484023	0.929215	0.858598	-2.65331	4.59601e-17	3.7632e-18	-0.483189	0.263143	0.113853	-2.93371	2.24512e-13	2.44518e-14	0.0805302	0.951245	0.874516	-8.79507	8.89744e-05	2.55724e-05	0.794033	0.375228	0.165984	-8.2211	0.00304475	0.00162404	NA	NA	NA	NA	NA	NA
C10090_6319	mmu_circ_0000453	mmu_circ_0000453	-0.448722	0.534061	0.3367	-0.669072	0.107937	0.0802052	0.181186	0.76139	0.560344	-0.863187	0.0687424	0.049065	-0.466839	0.643045	0.382518	-8.79507	8.7723e-05	2.55724e-05	0.37548	0.720268	0.486196	-0.0853494	0.920573	0.89208	NA	NA	NA	-0.22044	0.843353	0.694842
C10090_15539	mmu_circ_0000454	mmu_circ_0000454	-0.0951466	0.939224	0.892476	0.351777	0.779235	0.738458	-0.429807	0.681032	0.468802	-0.474241	0.311857	0.2547	0.261254	0.817578	0.61022	-0.243654	0.749616	0.685688	-0.598564	0.506401	0.26695	0.622503	0.266865	0.20203	-8.37069	0.00216152	0.000404838	-1.02769	0.138087	0.0489262
C10090_1009	mmu_circ_0000455	mmu_circ_0000455	NA	NA	NA	NA	NA	NA	NA	NA	NA	NA	NA	NA	NA	NA	NA	8.23362	0.00102168	0.00044214	NA	NA	NA	8.35843	0.00122783	0.000572918	-8.23362	0.00375635	0.000822422	-8.35843	0.00344481	0.000636664
C10090_9766	mmu_circ_0000456	mmu_circ_0000456	-8.74786	0.000402105	3.91668e-05	-0.718294	0.19312	0.151033	-8.56986	0.00207621	0.00031484	-8.56986	0.000305677	0.000126979	-8.02956	0.0039765	0.000716208	1.52579	0.00569285	0.00320354	NA	NA	NA	9.68018	6.40749e-08	8.44914e-09	0.775897	0.0891338	0.0313042	-0.279304	0.704027	0.485118
C10090_4408	mmu_circ_0000457	mmu_circ_0000457	NA	NA	NA	NA	NA	NA	NA	NA	NA	8.2211	0.00479598	0.00296306	NA	NA	NA	NA	NA	NA	-8.2211	0.00228819	0.000300122	-8.2211	0.0030327	0.00162404	8.57213	0.00120488	0.000151392	8.5263	0.00231753	0.000397182
C10090_12885	mmu_circ_0000458	mmu_circ_0000458	-0.538798	0.320936	0.164891	-1.32034	0.00115269	0.000575518	-0.77252	0.169391	0.065513	-1.17067	0.00319562	0.00186393	0.312442	0.760676	0.523324	1.20369	0.00914361	0.00528972	0.0773945	0.969908	0.914404	0.611137	0.229667	0.170413	0.00478605	0.998677	0.997262	-1.15388	0.0582287	0.0182703
C10090_9468	mmu_circ_0000461	mmu_circ_0000461	-8.26256	0.002992	0.000705366	1.19994	0.0587008	0.0418362	NA	NA	NA	9.59954	9.34501e-07	2.272e-07	0.657087	0.179021	0.0603562	0.0928538	0.85507	0.814578	-0.221897	0.759639	0.537364	-0.393259	0.464423	0.381522	-0.361584	0.609638	0.399706	-0.679978	0.395584	0.196487
C10090_33	mmu_circ_0000462	mmu_circ_0000462	0.211448	0.398734	0.221614	-0.297685	0.0374952	0.0260766	-0.314815	0.36942	0.182243	-0.553859	0.00163259	0.00085383	0.00999492	0.987167	0.962372	-0.414548	0.0846039	0.0573218	-0.246915	0.418592	0.196882	-0.818865	0.00174789	0.000888954	-0.282584	0.456168	0.256096	0.831025	0.00425729	0.000984536
C10090_13882	mmu_circ_0000464	mmu_circ_0000464	0.352188	0.725	0.537784	0.114886	0.959885	0.951218	-0.166844	0.929788	0.861748	0.329199	0.753192	0.705134	0.505235	0.574481	0.317214	-0.144224	0.857792	0.818578	-0.816906	0.32786	0.136677	-8.89905	0.000106019	3.34892e-05	0.308441	0.789183	0.611924	NA	NA	NA
C10090_9475	mmu_circ_0000467	mmu_circ_0000467	-0.187137	0.643137	0.444534	-0.506707	0.0108701	0.00713592	-0.277742	0.573768	0.352658	0.414689	0.160939	0.12266	0.661433	0.011541	0.0027079	1.14898	3.85809e-07	5.80532e-08	-0.311436	0.199505	0.0721686	0.34133	0.0797111	0.0529774	-0.465982	0.0471424	0.0150535	-0.0264666	0.91651	0.802432
C10090_10078	mmu_circ_0000470	mmu_circ_0000470	NA	NA	NA	10.1	2.48075e-10	3.69592e-11	0.681357	0.389288	0.194644	2.13944	1.2477e-05	3.72526e-06	-0.150324	0.823022	0.635964	-10.1	5.30441e-11	4.08868e-12	-0.591281	0.131616	0.0430748	-10.5716	9.13148e-14	4.9171e-15	NA	NA	NA	NA	NA	NA
C10090_11263	mmu_circ_0000472	mmu_circ_0000472	-0.265124	0.777475	0.609372	-9.11061	1.21518e-06	2.97248e-07	0.766205	0.277768	0.122654	-8.56986	0.000304067	0.000126979	NA	NA	NA	NA	NA	NA	NA	NA	NA	NA	NA	NA	NA	NA	NA	NA	NA	NA
C10090_13295	mmu_circ_0000473	mmu_circ_0000473	-0.957643	0.0354979	0.0120258	-10.2626	3.48546e-14	3.69074e-15	0.0849571	0.863466	0.737334	-9.50263	1.82718e-07	4.03628e-08	NA	NA	NA	NA	NA	NA	8.2075	0.00500935	0.000860002	NA	NA	NA	NA	NA	NA	NA	NA	NA
C10090_4094	mmu_circ_0000474	mmu_circ_0000474	-0.510351	0.30239	0.151721	-10.2626	3.49902e-14	3.69074e-15	0.195792	0.692801	0.482686	-1.69672	0.000674816	0.00032991	NA	NA	NA	NA	NA	NA	0.102176	0.967714	0.914558	-8.2211	0.00303871	0.00162404	NA	NA	NA	NA	NA	NA
C10090_9759	mmu_circ_0000477	mmu_circ_0000477	0.145711	0.860485	0.7145	0.477565	0.451627	0.388512	-1.30432	0.0152092	0.00440958	-0.863417	0.0234583	0.0157937	-0.549365	0.335383	0.138345	1.54168	8.37265e-08	1.0882e-08	-0.14496	0.86077	0.696634	1.74491	1.34522e-06	2.34138e-07	-0.740147	0.0076579	0.00209082	0.0547938	0.942657	0.877324
C10090_8228	mmu_circ_0000480	mmu_circ_0000480	NA	NA	NA	9.56567	2.96139e-07	6.49646e-08	NA	NA	NA	9.6541	5.3627e-07	1.25661e-07	0.347515	0.59037	0.330448	-9.56567	1.0608e-07	1.3983e-08	-0.709533	0.228578	0.0854064	-9.6541	1.89474e-07	2.7194e-08	NA	NA	NA	NA	NA	NA
C10090_10571	mmu_circ_0000482	mmu_circ_0000482	-8.52552	0.00113347	0.000166213	0.088821	0.928995	0.915078	-9.19795	8.20637e-05	3.9502e-06	-9.19795	3.73861e-06	1.01177e-06	0.100934	0.941871	0.85205	-8.61434	0.000267951	8.94268e-05	NA	NA	NA	8.49586	0.000657782	0.000272902	NA	NA	NA	-8.49586	0.00206825	0.00030619
C10090_3403	mmu_circ_0000483	mmu_circ_0000483	0.724031	0.205054	0.0923484	1.72386	3.34785e-05	1.0903e-05	-0.166676	0.92917	0.850576	1.33618	0.00839622	0.0054109	-0.539307	0.148484	0.047817	-1.19669	0.000560088	0.000223438	0.779441	0.0254049	0.00660592	0.0185831	0.965088	0.951994	0.0167757	0.987516	0.97912	-0.700707	0.169443	0.0630318
C10090_7832	mmu_circ_0000487	mmu_circ_0000487	NA	NA	NA	8.29278	0.00205357	0.00113783	NA	NA	NA	8.80607	0.000349023	0.000153355	0.335117	0.784372	0.554522	-8.29278	0.00123922	0.000584804	-0.0132759	0.974045	0.932544	-8.80607	0.000183716	6.3952e-05	NA	NA	NA	NA	NA	NA
C10090_8695	mmu_circ_0000490	mmu_circ_0000490	8.65284	0.000748269	9.3909e-05	NA	NA	NA	-8.69523	0.00123966	0.000151767	-8.69523	0.000148317	5.67488e-05	8.6279	0.000480178	2.43178e-05	NA	NA	NA	8.08215	0.00854297	0.00156122	NA	NA	NA	8.33136	0.00302841	0.000587228	NA	NA	NA
C10090_14236	mmu_circ_0000492	mmu_circ_0000492	NA	NA	NA	NA	NA	NA	8.26538	0.00561764	0.00143958	NA	NA	NA	NA	NA	NA	NA	NA	NA	NA	NA	NA	NA	NA	NA	NA	NA	NA	NA	NA	NA
C10090_6083	mmu_circ_0000493	mmu_circ_0000493	-0.210724	0.786918	0.624986	0.526074	0.335459	0.277082	-0.166778	0.897732	0.785328	-0.0186137	0.789201	0.747006	-0.217361	0.738094	0.489852	-0.670587	0.0944983	0.0647424	-0.0669487	0.913391	0.79626	0.94448	0.00480469	0.00267278	0.867133	0.0511636	0.0165188	-0.442913	0.269379	0.114432
C10090_11349	mmu_circ_0000495	mmu_circ_0000495	-0.00775301	0.995799	0.993934	0.767088	0.0175691	0.0117608	-0.371139	0.508131	0.28927	0.148287	0.882438	0.854674	0.0766064	0.880403	0.709428	1.15023	8.34429e-10	7.7319e-11	-0.297762	0.420314	0.201554	1.26888	4.05128e-09	4.29434e-10	-0.361623	0.0627526	0.0209274	-0.699426	0.00108767	0.000118716
C10090_1757	mmu_circ_0000498	mmu_circ_0000498	NA	NA	NA	NA	NA	NA	NA	NA	NA	NA	NA	NA	NA	NA	NA	NA	NA	NA	8.08215	0.00838016	0.00156122	NA	NA	NA	8.19377	0.00475876	0.00115653	NA	NA	NA
C10090_9052	mmu_circ_0000499	mmu_circ_0000499	1.22668	0.0517555	0.0183229	-8.26256	0.000495432	0.000222858	0.0260165	0.936074	0.875388	-8.91767	3.48315e-05	1.13346e-05	NA	NA	NA	NA	NA	NA	NA	NA	NA	NA	NA	NA	NA	NA	NA	NA	NA	NA
C10090_15396	mmu_circ_0000502	mmu_circ_0000502	-8.26256	0.0028466	0.000705366	-8.26256	0.000482018	0.000222858	NA	NA	NA	NA	NA	NA	NA	NA	NA	NA	NA	NA	NA	NA	NA	8.62132	0.000339523	0.000129993	NA	NA	NA	-8.62132	0.0011654	0.000147255
C10090_9916	mmu_circ_0000504	mmu_circ_0000504	-1.24411	0.00216373	0.000432514	-10.6131	5.27382e-18	4.11256e-19	-0.0556884	0.996264	0.99072	-9.75422	8.99066e-09	1.61021e-09	NA	NA	NA	NA	NA	NA	8.79279	0.00049165	2.4028e-05	NA	NA	NA	NA	NA	NA	NA	NA	NA
C10090_973	mmu_circ_0000505	mmu_circ_0000505	-8.52552	0.00118538	0.000166213	-0.117403	0.701781	0.649936	NA	NA	NA	8.48422	0.00172297	0.000906406	-8.40812	0.00111595	8.22666e-05	-8.40812	0.000767343	0.000312726	-8.48422	0.000926155	6.05444e-05	-8.48422	0.00101582	0.000445348	NA	NA	NA	NA	NA	NA
C10090_14667	mmu_circ_0000508	mmu_circ_0000508	0.940416	0.0403555	0.0138226	-0.55486	0.194805	0.15283	-0.16667	0.894461	0.78172	-1.36884	0.00280841	0.0015732	-0.379478	0.73388	0.483908	0.663201	0.217593	0.16228	-8.59954	0.00048045	2.71934e-05	1.19162	0.0201628	0.0121994	-0.592171	0.406804	0.21791	-0.390283	0.55932	0.328314
C10090_11323	mmu_circ_0000510	mmu_circ_0000510	NA	NA	NA	9.09987	2.05704e-05	6.45016e-06	8.26538	0.00540068	0.00143958	8.89905	0.000211233	8.48184e-05	0.228352	0.809039	0.597734	-0.38117	0.534057	0.453916	0.53098	0.507819	0.265258	0.459157	0.423855	0.343882	0.907918	0.142756	0.055093	-0.716521	0.33132	0.154101
C10090_4339	mmu_circ_0000511	mmu_circ_0000511	9.23769	2.41175e-05	8.97064e-07	9.40812	1.44228e-06	3.64344e-07	-0.607557	0.504608	0.28572	-0.137328	0.660897	0.603314	-0.195499	0.825557	0.631854	0.547678	0.202036	0.148607	0.530942	0.434558	0.210018	-9.2211	1.12596e-05	2.51832e-06	-0.996663	0.0550135	0.0179827	9.02873	0.000248004	1.49668e-05
C10090_9524	mmu_circ_0000512	mmu_circ_0000512	8.30469	0.00326038	0.000689242	10.4625	3.19938e-13	3.73578e-14	0.759429	0.31543	0.145866	2.46701	6.04572e-08	1.23309e-08	0.0232264	0.974086	0.936292	-1.0916	0.00373788	0.00195706	-0.603935	0.0715726	0.0210024	-0.908601	0.00581234	0.00328384	0.893185	0.0540949	0.0176313	0.505425	0.313615	0.142761
C10090_3747	mmu_circ_0000513	mmu_circ_0000513	0.34287	0.500145	0.303674	1.18786	0.000654951	0.00030671	0.385893	0.383574	0.19072	1.20388	0.000433931	0.000192094	0.114965	0.810818	0.599876	-0.126813	0.663857	0.591592	-0.0747896	0.843277	0.667506	-0.484364	0.0873748	0.058645	-0.411676	0.26591	0.121085	-0.0949593	0.841507	0.695106
C10090_6486	mmu_circ_0000514	mmu_circ_0000514	NA	NA	NA	9.16717	1.19616e-05	3.63044e-06	-8.91767	0.000429645	3.52658e-05	0.151376	0.948197	0.935888	-0.732122	0.333838	0.137026	-0.670913	0.260924	0.19818	0.460579	0.563478	0.313632	-0.22544	0.735623	0.673242	0.28248	0.798857	0.629048	-0.201917	0.842046	0.694956
C10090_15384	mmu_circ_0000515	mmu_circ_0000515	8.54574	0.0011443	0.0001825	8.79507	0.000161941	6.42714e-05	NA	NA	NA	9.2914	1.43745e-05	4.38984e-06	-0.36002	0.738984	0.49165	-8.79507	8.75998e-05	2.55724e-05	0.0862434	0.956908	0.887958	-0.795546	0.191863	0.139352	8.33136	0.00279676	0.000587228	-8.49586	0.00193282	0.00030619
C10090_15919	mmu_circ_0000520	mmu_circ_0000520	-0.854289	0.205959	0.0930316	-0.232858	0.457663	0.394644	0.24825	0.742036	0.537842	0.788701	0.17093	0.130952	0.952422	0.037685	0.00971944	0.551708	0.240249	0.180606	0.20907	0.800013	0.592658	-0.184747	0.717868	0.648166	0.107037	0.902541	0.78999	0.274256	0.7278	0.516426
C10090_57	mmu_circ_0000522	mmu_circ_0000522	NA	NA	NA	NA	NA	NA	8.26538	0.00598825	0.00143958	NA	NA	NA	8.43505	0.00110521	9.20818e-05	8.81826	3.81915e-05	9.63792e-06	8.32328	0.00337034	0.000473734	9.20628	7.25702e-06	1.51848e-06	0.14087	0.904541	0.796654	-0.177547	0.853952	0.691496
C10090_15219	mmu_circ_0000529	mmu_circ_0000529	NA	NA	NA	NA	NA	NA	NA	NA	NA	NA	NA	NA	8.43505	0.00100653	9.20818e-05	NA	NA	NA	NA	NA	NA	NA	NA	NA	8.19377	0.00441548	0.00115653	8.40088	0.00337761	0.000765178
C10090_8577	mmu_circ_0000531	mmu_circ_0000531	NA	NA	NA	NA	NA	NA	NA	NA	NA	NA	NA	NA	NA	NA	NA	NA	NA	NA	7.94486	0.0132262	0.00283418	NA	NA	NA	NA	NA	NA	NA	NA	NA
C10090_14239	mmu_circ_0000534	mmu_circ_0000534	8.43045	0.00186149	0.000354664	NA	NA	NA	NA	NA	NA	NA	NA	NA	NA	NA	NA	NA	NA	NA	NA	NA	NA	NA	NA	NA	8.19377	0.00447602	0.00115653	NA	NA	NA
C10090_1816	mmu_circ_0000539	mmu_circ_0000539	NA	NA	NA	11.117	1.00551e-20	6.82994e-22	8.52865	0.00223514	0.000386206	9.6541	5.34263e-07	1.25661e-07	0.140158	0.752496	0.515084	0.253912	0.321276	0.251528	1.29061	0.000515113	3.0016e-05	1.53195	3.58631e-06	6.9871e-07	-1.91414	2.25781e-08	2.02638e-10	-0.0949476	0.827194	0.647598
C10090_3618	mmu_circ_0000541	mmu_circ_0000541	NA	NA	NA	8.16692	0.00348587	0.00202156	NA	NA	NA	8.59954	0.000991083	0.00050132	-0.0794534	0.954579	0.892786	-8.16692	0.0022062	0.0010936	-0.06972	0.94222	0.854846	-8.59954	0.000584517	0.000233212	NA	NA	NA	NA	NA	NA
C10090_5380	mmu_circ_0000542	mmu_circ_0000542	NA	NA	NA	8.16692	0.00345409	0.00202156	8.40301	0.00334977	0.000745636	8.70667	0.000601815	0.000277272	-8.16692	0.00259893	0.000348152	0.329338	0.657933	0.58375	-0.383389	0.708034	0.463594	-0.348237	0.651129	0.575208	-0.302483	0.794776	0.623582	-8.35843	0.00322283	0.000636664
C10090_12573	mmu_circ_0000543	mmu_circ_0000543	-0.0562335	0.924439	0.847258	-1.2936	2.38856e-06	6.13192e-07	0.193193	0.525262	0.304868	-1.11809	0.000199586	7.88684e-05	0.623821	0.13735	0.0431096	-0.925447	0.0472048	0.0304828	0.451512	0.403618	0.182842	-9.89921	9.42391e-09	1.07085e-09	-8.91139	0.000192022	1.17009e-05	NA	NA	NA
C10090_985	mmu_circ_0000544	mmu_circ_0000544	-0.220827	0.861019	0.728076	1.57448	0.00213359	0.00118654	8.52865	0.00230186	0.000386206	10.2211	3.74042e-10	5.69498e-11	-0.0459436	0.949537	0.88012	0.539335	0.102753	0.0708824	-0.240821	0.665062	0.414622	0.596599	0.0698278	0.0458018	0.186652	0.700739	0.503956	-0.0690072	0.883121	0.756336
C10090_14140	mmu_circ_0000545	mmu_circ_0000545	8.16742	0.00481301	0.00133945	9.09987	2.04101e-05	6.45016e-06	NA	NA	NA	10.1471	1.14965e-09	1.8617e-10	0.849807	0.0923878	0.0270164	0.566528	0.237289	0.178283	-0.238985	0.679839	0.429372	-0.587127	0.172088	0.123639	0.562898	0.261924	0.118652	-0.0949965	0.910377	0.792556
C10090_3534	mmu_circ_0000546	mmu_circ_0000546	NA	NA	NA	NA	NA	NA	8.26538	0.00535041	0.00143958	NA	NA	NA	NA	NA	NA	NA	NA	NA	NA	NA	NA	NA	NA	NA	NA	NA	NA	NA	NA	NA
C10090_13526	mmu_circ_0000548	mmu_circ_0000548	-0.390481	0.559276	0.360978	-0.900337	0.0279105	0.01909	0.235352	0.633589	0.414636	-9.91782	9.07316e-10	1.43733e-10	-0.0797899	0.948212	0.868436	-8.79507	8.82194e-05	2.55724e-05	8.52982	0.00140752	0.00014375	NA	NA	NA	NA	NA	NA	NA	NA	NA
C10090_4592	mmu_circ_0000549	mmu_circ_0000549	NA	NA	NA	10.752	4.12575e-16	3.77608e-17	-0.273454	0.842879	0.703806	1.40775	0.00334691	0.00195586	-0.569652	0.122735	0.037595	-1.51867	3.77173e-05	9.75794e-06	0.619294	0.0878726	0.0264462	-1.96699	5.82497e-05	1.63746e-05	0.0977609	0.92275	0.839716	0.390432	0.754222	0.544064
C10090_15595	mmu_circ_0000551	mmu_circ_0000551	0.747199	0.0606157	0.02193	-0.283723	0.331114	0.272882	-0.00627822	0.934583	0.872954	-0.491335	0.14397	0.108714	0.322244	0.637633	0.377866	0.203964	0.669804	0.597716	-0.0837121	0.904356	0.77384	-0.277926	0.597397	0.51305	-0.0922537	0.89787	0.802654	-0.0949669	0.915945	0.80129
C10090_10933	mmu_circ_0000552	mmu_circ_0000552	-8.52552	0.00112119	0.000166213	-8.52552	0.000113595	4.25894e-05	NA	NA	NA	NA	NA	NA	NA	NA	NA	9.43505	1.54267e-07	2.11572e-08	NA	NA	NA	9.03645	2.69122e-05	6.69238e-06	-0.656311	0.338332	0.167648	-0.188138	0.851446	0.693682
C10090_1263	mmu_circ_0000553	mmu_circ_0000553	-0.5005	0.0728365	0.027092	-0.781592	0.000139721	5.3761e-05	-1.15578	1.12319e-05	2.43764e-07	-1.72113	2.77965e-14	2.78882e-15	0.0635175	0.91454	0.798378	2.19302	5.70217e-34	8.0658e-36	0.65952	0.0484215	0.0135617	2.16053	4.90492e-23	1.3102e-24	-1.14079	7.76798e-12	3.8528e-14	-0.927604	2.46213e-06	4.46922e-08
C10090_12764	mmu_circ_0000554	mmu_circ_0000554	-8.74786	0.000415813	3.91668e-05	0.767054	0.230749	0.184107	8.94369	0.000399598	2.77962e-05	NA	NA	NA	-0.565085	0.402743	0.180687	1.32728	0.000102547	3.0209e-05	9.14644	5.6107e-05	1.2187e-06	10.591	1.46e-14	6.93324e-16	-0.684973	0.0569422	0.0186938	-0.0646576	0.906811	0.784962
C10090_4017	mmu_circ_0000555	mmu_circ_0000555	-0.443164	0.657259	0.461154	1.84245	3.72682e-05	1.25426e-05	8.40301	0.00318646	0.000745636	10.5716	7.23535e-13	8.43726e-14	0.0818538	0.885833	0.755952	1.4086	6.85527e-10	6.26784e-11	-0.819517	0.028603	0.00755698	1.57329	2.06204e-11	1.53877e-12	-0.385671	0.100211	0.0357152	-0.516996	0.0161783	0.00442024
C10090_8477	mmu_circ_0000559	mmu_circ_0000559	NA	NA	NA	9.23122	7.16359e-06	2.04338e-06	NA	NA	NA	8.9867	0.000127368	4.69118e-05	-0.281394	0.760516	0.524146	0.587201	0.19422	0.142699	0.221051	0.847384	0.67589	0.137167	0.830098	0.777832	0.0074904	0.998675	0.996552	1.48993	0.00101385	0.000109702
C10090_15342	mmu_circ_0000571	mmu_circ_0000571	NA	NA	NA	11.1339	5.69386e-21	3.8442e-22	8.52865	0.00216203	0.000386206	10.8534	1.36569e-15	1.25e-16	0.0330034	0.951169	0.882216	-0.763007	0.0063747	0.00361076	0.126895	0.840292	0.662862	-1.64711	1.7606e-05	4.15422e-06	-1.32925	0.00299913	0.000576592	0.378869	0.656491	0.422804
C10090_9049	mmu_circ_0000572	mmu_circ_0000572	-9.74803	1.0736e-07	1.58008e-09	0.687541	0.132311	0.099647	-0.166879	0.915936	0.821386	0.494878	0.416335	0.354228	-0.163986	0.786607	0.56317	0.406627	0.185197	0.135272	0.652105	0.139929	0.0464384	0.910982	0.00800736	0.00460716	-0.385428	0.328057	0.160697	0.0350715	0.982008	0.946126
C10090_5566	mmu_circ_0000575	mmu_circ_0000575	-8.40003	0.00200246	0.000342406	-8.40003	0.000239287	9.74236e-05	NA	NA	NA	NA	NA	NA	NA	NA	NA	NA	NA	NA	NA	NA	NA	NA	NA	NA	NA	NA	NA	NA	NA	NA
C10090_14582	mmu_circ_0000576	mmu_circ_0000576	-0.317405	0.764076	0.59151	-8.74786	2.52621e-05	8.13904e-06	8.40301	0.00327206	0.000745636	NA	NA	NA	NA	NA	NA	NA	NA	NA	NA	NA	NA	NA	NA	NA	NA	NA	NA	NA	NA	NA
C10090_7139	mmu_circ_0000577	mmu_circ_0000577	-0.247164	0.582239	0.382966	0.383712	0.357458	0.297894	-0.0979867	0.955745	0.908144	0.497296	0.209147	0.163314	-0.0955801	0.834662	0.651776	0.680306	0.00119788	0.000539266	0.149381	0.790778	0.580862	1.19005	7.4758e-08	9.98464e-09	-0.00626795	0.968086	0.94888	-0.202665	0.419844	0.216454
C10090_15353	mmu_circ_0000578	mmu_circ_0000578	-0.220827	0.859387	0.728076	1.31132	0.0172532	0.0115246	8.75087	0.000895129	0.00010361	10.069	3.55532e-09	6.0859e-10	0.623821	0.137172	0.0431096	1.20393	0.000116285	3.44706e-05	0.801626	0.0244698	0.00633722	1.30713	1.13714e-05	2.57224e-06	0.638359	0.0128883	0.00363454	-0.149406	0.692871	0.471224
C10090_14170	mmu_circ_0000585	mmu_circ_0000585	NA	NA	NA	8.02956	0.00570481	0.0035917	NA	NA	NA	NA	NA	NA	-0.0800284	0.952878	0.897422	-8.02956	0.00376161	0.00204506	8.52982	0.00138765	0.00014375	NA	NA	NA	NA	NA	NA	8.74886	0.0010088	0.000107015
C10090_4887	mmu_circ_0000587	mmu_circ_0000587	-0.47355	0.649087	0.45021	1.89955	3.48077e-05	1.13573e-05	NA	NA	NA	10.654	1.33773e-13	1.4275e-14	-0.420926	0.341849	0.142827	-0.0744391	0.836521	0.793306	0.0131021	0.98882	0.97519	0.0547296	0.881639	0.84351	0.0495248	0.953117	0.881532	-0.0949496	0.839101	0.697866
C10090_10566	mmu_circ_0000588	mmu_circ_0000588	-0.787073	0.002735	0.000556954	-0.455327	0.0069847	0.00449784	-0.18164	0.765284	0.56683	0.154631	0.812315	0.772638	0.298663	0.339027	0.140678	-1.82858	3.02433e-08	3.58976e-09	-0.0722529	0.806811	0.60376	-2.12818	1.08496e-13	5.93426e-15	-0.0397644	0.967473	0.916746	0.0119559	0.996314	0.988094
C10090_2652	mmu_circ_0000589	mmu_circ_0000589	-0.0654723	0.893867	0.791492	-0.0630675	0.393611	0.332384	-0.151141	0.841294	0.6765	-0.757509	0.000569026	0.000254528	-0.220043	0.526021	0.273376	0.35584	0.0945278	0.0647238	0.591827	0.038284	0.0104665	0.789251	0.00122116	0.000595952	0.19299	0.500175	0.295214	0.445607	0.0682587	0.0218196
C10090_13523	mmu_circ_0000591	mmu_circ_0000591	-0.281603	0.657863	0.46193	-1.69221	0.000165678	6.40204e-05	-0.088754	0.980274	0.951362	0.573003	0.331796	0.273394	1.62041	0.00228934	0.000278162	2.37353	3.50785e-08	4.2356e-09	-0.423275	0.473101	0.237934	1.41184	7.42543e-06	1.5978e-06	0.334743	0.39551	0.208124	-0.133932	0.739137	0.528478
C10090_12786	mmu_circ_0000597	mmu_circ_0000597	NA	NA	NA	9.99308	1.26259e-09	2.0728e-10	NA	NA	NA	10.391	2.20334e-11	2.94748e-12	0.335146	0.527812	0.275924	-1.62239	0.00093675	0.000399242	0.0130484	0.988785	0.975568	-1.89517	5.95197e-05	1.67695e-05	0.670972	0.427627	0.232094	-0.0949756	0.935971	0.85323
C10090_13154	mmu_circ_0000598	mmu_circ_0000598	NA	NA	NA	NA	NA	NA	NA	NA	NA	NA	NA	NA	NA	NA	NA	8.23362	0.00100455	0.00044214	NA	NA	NA	NA	NA	NA	-8.23362	0.00359725	0.000822422	NA	NA	NA
C10090_14940	mmu_circ_0000600	mmu_circ_0000600	NA	NA	NA	NA	NA	NA	NA	NA	NA	NA	NA	NA	NA	NA	NA	NA	NA	NA	NA	NA	NA	8.84361	9.63496e-05	2.94952e-05	NA	NA	NA	-0.442728	0.657604	0.433442
C10090_7187	mmu_circ_0000603	mmu_circ_0000603	-0.253317	0.417498	0.234612	-1.00675	1.82039e-06	4.64342e-07	0.0161629	0.862381	0.734248	-1.29138	4.13132e-06	1.13259e-06	-0.201117	0.705715	0.446458	-0.843356	0.0123149	0.00726072	0.681745	0.085796	0.0256958	-0.468508	0.298095	0.229464	0.410877	0.441394	0.243736	0.0251997	0.998083	0.986554
C10090_14257	mmu_circ_0000604	mmu_circ_0000604	NA	NA	NA	9.02956	3.42603e-05	1.14599e-05	8.40301	0.00329216	0.000745636	9.06905	7.19936e-05	2.59462e-05	0.920118	0.0650518	0.0180264	1.20382	0.00343318	0.0017919	0.723581	0.237686	0.0900506	1.01164	0.0245707	0.0149914	-0.191721	0.741524	0.553954	1.20055	0.000429404	3.49232e-05
C10090_5565	mmu_circ_0000605	mmu_circ_0000605	NA	NA	NA	8.16692	0.00345288	0.00202156	NA	NA	NA	NA	NA	NA	-8.16692	0.00259498	0.000348152	-8.16692	0.00217649	0.0010936	8.87067	0.000296137	1.32359e-05	NA	NA	NA	NA	NA	NA	NA	NA	NA
C10090_3706	mmu_circ_0000607	mmu_circ_0000607	NA	NA	NA	NA	NA	NA	NA	NA	NA	8.2211	0.00482001	0.00296306	NA	NA	NA	8.37069	0.000529791	0.000205704	-8.2211	0.00231398	0.000300122	1.20747	0.0410736	0.025966	0.823084	0.284153	0.131137	-0.317173	0.694955	0.473788
C10090_14953	mmu_circ_0000610	mmu_circ_0000610	-0.284223	0.525752	0.328648	0.182108	0.880009	0.853824	0.479618	0.125539	0.045444	-0.0909624	0.582242	0.518958	0.272099	0.458468	0.220012	-2.23687	6.46099e-09	6.96696e-10	0.0105015	0.983837	0.96781	-2.1846	3.37705e-06	6.40758e-07	0.401015	0.64643	0.443676	0.904838	0.263126	0.110721
C10090_1112	mmu_circ_0000611	mmu_circ_0000611	NA	NA	NA	8.02956	0.00589901	0.0035917	NA	NA	NA	8.2211	0.00491859	0.00296306	-8.02956	0.0040129	0.000716208	-8.02956	0.00387259	0.00204506	-0.138955	0.911357	0.786302	-8.2211	0.00310649	0.00162404	NA	NA	NA	NA	NA	NA
C10090_2765	mmu_circ_0000620	mmu_circ_0000620	NA	NA	NA	NA	NA	NA	NA	NA	NA	NA	NA	NA	NA	NA	NA	8.7187	7.46864e-05	2.07156e-05	NA	NA	NA	9.28425	3.67657e-06	7.2331e-07	-8.7187	0.00054521	4.82886e-05	-9.28425	2.90395e-05	8.76252e-07
C10090_11185	mmu_circ_0000621	mmu_circ_0000621	-0.0431273	0.92742	0.851976	0.187367	0.781127	0.740572	-0.0589357	0.995227	0.984704	0.581815	0.00567165	0.00361014	0.412373	0.0130316	0.00309224	-0.562477	0.00225077	0.00115215	-0.29809	0.0934188	0.0284666	-0.913932	8.41385e-07	1.39131e-07	0.378698	0.115207	0.0423388	-0.391125	0.168873	0.0626604
C10090_15477	mmu_circ_0000624	mmu_circ_0000624	-0.981558	0.00518305	0.00150068	-0.4358	0.0502441	0.0355204	0.418297	0.315433	0.144639	0.0367249	0.879952	0.851298	-0.637905	0.127859	0.0394516	-0.88021	0.0169718	0.0102047	-0.880525	0.0513786	0.0144435	-0.651223	0.13121	0.0912376	-0.098591	0.899993	0.801576	0.303427	0.704276	0.487282
C10090_4219	mmu_circ_0000625	mmu_circ_0000625	0.200259	0.783415	0.617382	1.41616	0.000294877	0.000125624	-0.407881	0.630154	0.410284	0.732139	0.0930162	0.067557	-0.603444	0.0868924	0.025161	-0.0220928	0.947799	0.928952	-0.0873964	0.86142	0.69806	-0.18482	0.627639	0.55113	0.165114	0.728724	0.535442	0.513925	0.224498	0.089069
C10090_13149	mmu_circ_0000626	mmu_circ_0000626	0.0682669	0.924182	0.84727	1.25252	0.00104426	0.000518808	-0.429807	0.682135	0.468802	1.23352	0.0048016	0.0030426	0.000315464	0.998812	0.997384	-0.144128	0.653367	0.57836	0.448781	0.256996	0.0995136	0.194913	0.5833	0.499088	0.388427	0.291855	0.135795	-0.0669582	0.893926	0.770226
C10090_5266	mmu_circ_0000628	mmu_circ_0000628	9.30492	1.34767e-05	4.61604e-07	9.02956	3.43657e-05	1.14599e-05	8.8505	0.000584463	5.36652e-05	9.1472	4.21881e-05	1.43504e-05	-0.0797366	0.943188	0.857864	0.203817	0.72251	0.653932	-0.202639	0.8151	0.623412	0.0590769	0.923438	0.895052	-9.23338	2.27254e-05	6.87022e-07	-0.357972	0.680809	0.460774
C10090_2714	mmu_circ_0000629	mmu_circ_0000629	0.457551	0.534938	0.339114	-0.439253	0.350225	0.290932	NA	NA	NA	8.70667	0.000610563	0.000277272	0.219781	0.870287	0.694168	-8.40812	0.0007597	0.000312726	0.164004	0.913394	0.795118	0.0300715	0.963615	0.948702	NA	NA	NA	-0.210437	0.841034	0.695112
C10090_13832	mmu_circ_0000631	mmu_circ_0000631	0.226693	0.731359	0.554048	-1.3586	0.00538112	0.00325208	-0.507932	0.594718	0.373974	-0.75889	0.129579	0.0968774	0.0459449	0.979733	0.947522	-8.16692	0.00216941	0.0010936	0.345025	0.765594	0.544614	-8.59954	0.000578979	0.000233212	NA	NA	NA	NA	NA	NA
C10090_3641	mmu_circ_0000635	mmu_circ_0000635	-1.81757	0.00115343	0.0001855	-0.817821	0.0229524	0.0155245	-0.359342	0.702472	0.492356	-0.0413034	0.768613	0.722276	0.460549	0.501793	0.252792	-0.933548	0.124581	0.0872682	-0.276455	0.693989	0.44744	-0.617651	0.237242	0.177039	-0.0398479	0.967151	0.94271	-0.510145	0.571741	0.342748
C10090_1760	mmu_circ_0000637	mmu_circ_0000637	-0.251349	0.669541	0.474788	-0.474005	0.100822	0.0744218	-0.944247	0.0723133	0.024366	-0.293754	0.31201	0.255306	0.367544	0.521236	0.269612	-0.753174	0.112603	0.078185	-0.154296	0.809512	0.606796	-0.86269	0.0640984	0.041772	0.779862	0.183988	0.075481	0.572409	0.419818	0.215748
C10090_9004	mmu_circ_0000638	mmu_circ_0000638	NA	NA	NA	9.29255	4.24579e-06	1.1501e-06	NA	NA	NA	9.59954	9.37045e-07	2.272e-07	-0.272405	0.764398	0.527914	-9.29255	1.82225e-06	3.19772e-07	-0.332989	0.629774	0.380258	-9.59954	3.42117e-07	5.19304e-08	NA	NA	NA	NA	NA	NA
C10090_7190	mmu_circ_0000639	mmu_circ_0000639	NA	NA	NA	10.6849	2.18641e-15	2.11776e-16	NA	NA	NA	10.1845	6.61935e-10	1.02968e-10	0.00891149	0.993283	0.975636	-1.12957	0.00127261	0.000574476	0.296186	0.61151	0.359396	0.278101	0.46568	0.383542	0.403921	0.502379	0.297346	-0.311842	0.541602	0.312168
C10090_9687	mmu_circ_0000644	mmu_circ_0000644	NA	NA	NA	NA	NA	NA	NA	NA	NA	NA	NA	NA	7.94953	0.00635737	0.00132029	NA	NA	NA	NA	NA	NA	NA	NA	NA	NA	NA	NA	NA	NA	NA
C10090_2900	mmu_circ_0000645	mmu_circ_0000645	NA	NA	NA	9.29255	4.22976e-06	1.1501e-06	NA	NA	NA	9.2211	2.50512e-05	7.93702e-06	0.24214	0.780997	0.547352	1.50154	2.7247e-05	6.62464e-06	0.355758	0.677183	0.42727	0.673259	0.152388	0.107418	-10.7941	1.91844e-16	6.79656e-19	-0.782967	0.170095	0.0633546
C10090_4168	mmu_circ_0000647	mmu_circ_0000647	0.779401	0.263942	0.127133	-8.52552	0.000112854	4.25894e-05	-8.43212	0.00345708	0.000653132	-8.43212	0.000594811	0.000284122	NA	NA	NA	NA	NA	NA	NA	NA	NA	NA	NA	NA	NA	NA	NA	NA	NA	NA
C10090_13400	mmu_circ_0000650	mmu_circ_0000650	0.180354	0.828155	0.676574	0.804491	0.127797	0.095802	1.05581	0.0652066	0.0215178	1.56145	0.00185136	0.00102242	0.335146	0.527606	0.275924	0.127806	0.760901	0.700378	-0.207649	0.710038	0.467872	-0.0910197	0.838859	0.789598	-0.0792267	0.897431	0.802686	-0.22432	0.710335	0.497
C10090_6257	mmu_circ_0000651	mmu_circ_0000651	0.104814	0.43408	0.246486	-3.25537	2.47182e-86	2.73914e-88	-0.0480739	0.938528	0.87925	-3.83809	6.08432e-103	4.81926e-105	0.265965	0.602957	0.343034	-1.7963	8.24675e-05	2.33472e-05	-0.00627074	0.974486	0.929914	-9.98655	2.83263e-09	2.93652e-10	-8.49625	0.00138095	0.000199283	NA	NA	NA
C10090_1101	mmu_circ_0000659	mmu_circ_0000659	0.0568072	0.892248	0.78982	-1.08105	0.000115131	4.40866e-05	-0.610335	0.114949	0.040939	-1.39176	3.2705e-06	8.7645e-07	0.463399	0.345414	0.144458	0.396541	0.304854	0.237296	0.598011	0.207768	0.0761554	0.0375408	0.940583	0.916256	-0.554252	0.257305	0.115161	-0.510004	0.409984	0.207408
C10090_5040	mmu_circ_0000660	mmu_circ_0000660	-0.791771	0.0574514	0.0206622	-0.980244	0.00189996	0.00100398	0.521402	0.366273	0.179264	0.618899	0.279137	0.225398	0.200364	0.807406	0.59323	1.98149	3.22854e-11	2.4224e-12	-0.14716	0.821617	0.631142	1.79533	3.58748e-10	3.13344e-11	-0.302694	0.326006	0.158768	-0.261312	0.381127	0.185802
C10090_14516	mmu_circ_0000661	mmu_circ_0000661	-0.202121	0.855607	0.730826	1.84245	3.72455e-05	1.25426e-05	0.0961165	0.882133	0.76211	2.1672	3.3164e-08	6.53064e-09	-0.318727	0.49973	0.25012	-10.5903	2.11949e-15	9.77626e-17	-0.833847	0.00501092	0.000798524	-11.1846	4.21143e-21	1.27673e-22	9.77873	1.27028e-07	1.5001e-09	NA	NA	NA
C10090_7359	mmu_circ_0000662	mmu_circ_0000662	-0.0173283	0.991489	0.984856	-0.315548	0.414751	0.35296	0.454722	0.544617	0.321406	-8.81089	7.17742e-05	2.53618e-05	0.0805302	0.950612	0.874516	-8.79507	8.75384e-05	2.55724e-05	8.94457	0.000198349	7.29102e-06	NA	NA	NA	NA	NA	NA	NA	NA	NA
C10090_15673	mmu_circ_0000663	mmu_circ_0000663	-0.121228	0.836761	0.686516	-1.51672	4.24192e-06	1.16385e-06	-0.166669	0.859865	0.731148	-0.895739	0.00586241	0.00373672	0.681967	0.203661	0.071242	0.139684	0.796339	0.743446	-0.49875	0.41689	0.195384	0.417237	0.329872	0.257352	0.748814	0.137282	0.0527532	-0.228158	0.710321	0.496488
C10090_8519	mmu_circ_0000664	mmu_circ_0000664	0.215113	0.613906	0.41283	-0.176482	0.335542	0.27722	-0.88794	0.0185129	0.00545496	-0.334616	0.139922	0.10538	0.126681	0.831108	0.648152	-0.10423	0.784906	0.728588	-0.201081	0.660943	0.411088	-0.312569	0.371523	0.294572	0.152984	0.800022	0.63091	-0.130657	0.827113	0.64773
C10090_1785	mmu_circ_0000665	mmu_circ_0000665	NA	NA	NA	NA	NA	NA	-8.91767	0.000438565	3.52658e-05	-8.91767	3.47141e-05	1.13346e-05	NA	NA	NA	NA	NA	NA	NA	NA	NA	NA	NA	NA	NA	NA	NA	NA	NA	NA
C10090_13723	mmu_circ_0000670	mmu_circ_0000670	NA	NA	NA	NA	NA	NA	NA	NA	NA	8.35843	0.00284835	0.00163882	NA	NA	NA	NA	NA	NA	0.17139	0.922236	0.813794	0.262888	0.726521	0.661524	8.33136	0.00285129	0.000587228	-8.62132	0.00119666	0.000147255
C10090_15891	mmu_circ_0000672	mmu_circ_0000672	0.734719	0.179104	0.0780736	1.12061	0.0172655	0.0115434	-0.166753	0.907261	0.80048	0.727293	0.111027	0.0820546	0.254508	0.637557	0.375478	-0.19052	0.637577	0.558762	-0.185247	0.718693	0.486784	-0.298962	0.4454	0.363912	0.290552	0.596515	0.385748	0.175246	0.818329	0.638922
C10090_1084	mmu_circ_0000673	mmu_circ_0000673	1.44531	0.00811593	0.0024085	1.2145	0.0423283	0.0295942	-0.166796	0.926794	0.845306	0.440981	0.567677	0.503478	0.0131904	0.993386	0.97594	-0.615653	0.215732	0.160361	0.30846	0.71661	0.47789	-0.000439578	0.995494	0.993806	-0.220138	0.814443	0.662096	-0.168881	0.853469	0.68869
C10090_3653	mmu_circ_0000675	mmu_circ_0000675	0.611017	0.283059	0.139598	0.563457	0.36882	0.309482	-0.429807	0.680757	0.468802	0.706246	0.192595	0.149669	0.197635	0.790138	0.566182	0.246826	0.566574	0.485734	-0.319442	0.587869	0.334452	0.0941312	0.8364	0.786574	-0.426741	0.450237	0.251916	-0.438813	0.440532	0.230132
C10090_14103	mmu_circ_0000677	mmu_circ_0000677	NA	NA	NA	8.61434	0.000457282	0.000202882	NA	NA	NA	9.1472	4.2025e-05	1.43504e-05	-0.179297	0.878973	0.737174	-0.380722	0.613282	0.532944	-0.276532	0.747481	0.521582	-0.303598	0.638716	0.562346	1.03035	0.155298	0.0612536	0.185128	0.883113	0.75508
C10090_10727	mmu_circ_0000678	mmu_circ_0000678	NA	NA	NA	9.87759	6.64892e-09	1.1625e-09	-9.01737	0.00025671	1.69997e-05	1.46675	0.00134425	0.000699186	0.858726	0.0135455	0.00322802	-1.26583	0.00820448	0.00472792	-0.0284825	0.944775	0.859532	-0.640511	0.0902829	0.0606926	1.06737	0.0746272	0.025381	0.142093	0.871395	0.739104
C10090_12149	mmu_circ_0000679	mmu_circ_0000679	0.510564	0.136089	0.0560816	-0.508633	0.0587405	0.0418886	0.301092	0.38112	0.188863	-0.4083	0.133918	0.100357	0.626449	0.113043	0.0340952	0.599851	0.0793271	0.0535352	0.173458	0.806826	0.611354	-0.760825	0.0674666	0.0441386	-0.361707	0.426926	0.231512	0.533018	0.389358	0.191925
C10090_764	mmu_circ_0000680	mmu_circ_0000680	0.69326	0.372481	0.201142	2.00799	3.88066e-05	1.30842e-05	-9.11035	0.0001495	8.19464e-06	1.43268	0.00131491	0.000683348	-0.0523298	0.940049	0.849442	0.673406	0.0169194	0.0101662	-0.0376172	0.930089	0.831602	0.833148	0.00223807	0.00114537	0.24978	0.493454	0.287052	-0.112852	0.76775	0.572102
C10090_11976	mmu_circ_0000681	mmu_circ_0000681	NA	NA	NA	8.95565	5.79884e-05	2.03608e-05	NA	NA	NA	8.59954	0.000990221	0.00050132	0.131548	0.904901	0.778692	-0.459395	0.478032	0.398458	0.415595	0.698853	0.45262	0.606741	0.320692	0.248966	0.28248	0.799337	0.629048	-0.177547	0.853704	0.691496
C10090_3032	mmu_circ_0000682	mmu_circ_0000682	8.30469	0.00314493	0.000689242	10.5656	3.52018e-14	3.74918e-15	NA	NA	NA	10.5716	7.26276e-13	8.43726e-14	-0.808522	0.0316461	0.00801976	0.252764	0.422423	0.345178	-0.334114	0.447631	0.220076	0.137176	0.703357	0.629994	0.357207	0.319965	0.154466	-0.243785	0.609461	0.376998
C10090_13880	mmu_circ_0000683	mmu_circ_0000683	NA	NA	NA	NA	NA	NA	NA	NA	NA	NA	NA	NA	NA	NA	NA	8.37069	0.000522073	0.000205704	NA	NA	NA	NA	NA	NA	0.0858724	0.960902	0.899172	NA	NA	NA
C10090_4055	mmu_circ_0000684	mmu_circ_0000684	-0.194526	0.852999	0.731566	-0.139666	0.641044	0.58724	-0.282243	0.845222	0.703646	-0.104224	0.753498	0.704094	-8.7077	0.000248786	9.4495e-06	-0.337017	0.644817	0.565768	-0.276634	0.79161	0.579654	-0.348237	0.651442	0.575208	0.308441	0.789664	0.611924	0.489879	0.660034	0.43271
C10090_8409	mmu_circ_0000687	mmu_circ_0000687	-1.24411	0.00216663	0.000432514	-0.261561	0.212493	0.168625	-0.166769	0.874746	0.751834	0.213242	0.764231	0.717654	0.70257	0.0229373	0.00563948	2.4966	1.31915e-36	1.64962e-38	-0.0419373	0.923804	0.818072	2.28494	9.34915e-30	1.94237e-31	-1.34695	3.40189e-14	1.3659e-16	-0.368236	0.0248512	0.00705348
C10090_15273	mmu_circ_0000693	mmu_circ_0000693	NA	NA	NA	10.2926	8.94683e-12	1.17504e-12	NA	NA	NA	10.1087	2.01562e-09	3.36602e-10	-0.23849	0.68765	0.430536	1.67421	3.13578e-12	2.03138e-13	-0.237982	0.683166	0.437038	1.92769	7.55479e-14	4.02004e-15	-0.0075165	0.968402	0.942328	-0.0837497	0.766243	0.581456
C10090_12846	mmu_circ_0000698	mmu_circ_0000698	NA	NA	NA	10.752	4.10733e-16	3.77608e-17	NA	NA	NA	10.5996	4.12633e-13	4.66652e-14	-0.664848	0.0619815	0.0170237	0.0173786	0.960815	0.949194	0.0454841	0.974714	0.92891	-0.563323	0.118722	0.0815222	-0.374105	0.360282	0.183374	0.763052	0.0554819	0.0173168
C10090_3531	mmu_circ_0000700	mmu_circ_0000700	NA	NA	NA	9.16717	1.20512e-05	3.63044e-06	NA	NA	NA	9.48402	2.8037e-06	7.42718e-07	0.161059	0.879273	0.70744	-9.16717	5.52661e-06	1.11824e-06	-0.276271	0.713216	0.473094	-9.48402	1.10281e-06	1.89373e-07	NA	NA	NA	NA	NA	NA
C10090_3839	mmu_circ_0000701	mmu_circ_0000701	NA	NA	NA	NA	NA	NA	NA	NA	NA	NA	NA	NA	8.32823	0.00155028	0.000179183	10.2334	8.14743e-13	4.74348e-14	8.32328	0.00319921	0.000473734	10.5599	2.8727e-14	1.45553e-15	-0.361629	0.491106	0.285106	-0.260876	0.606315	0.372622
C10090_11290	mmu_circ_0000702	mmu_circ_0000702	NA	NA	NA	NA	NA	NA	NA	NA	NA	NA	NA	NA	8.32823	0.00156132	0.000179183	10.1968	1.66893e-12	1.01956e-13	8.32328	0.00324498	0.000473734	10.5599	2.88477e-14	1.45553e-15	-0.23757	0.675211	0.474912	-0.226141	0.660427	0.432656
C10090_7419	mmu_circ_0000705	mmu_circ_0000705	NA	NA	NA	NA	NA	NA	NA	NA	NA	NA	NA	NA	8.43505	0.00100205	9.20818e-05	NA	NA	NA	7.94486	0.0116182	0.00283418	8.62132	0.000339148	0.000129993	NA	NA	NA	-8.62132	0.00116323	0.000147255
C10090_7171	mmu_circ_0000721	mmu_circ_0000721	0.0421289	0.97131	0.9409	2.02999	7.00056e-05	2.50256e-05	-0.844903	0.233333	0.0981636	-0.211385	0.51847	0.45379	-0.964326	0.0211738	0.0051713	-1.13318	0.00478349	0.00266534	0.723729	0.146751	0.0490396	-1.12559	0.0533797	0.0343454	-0.702807	0.360788	0.184484	1.04245	0.160554	0.0588548
C10090_5326	mmu_circ_0000723	mmu_circ_0000723	-0.210515	0.858583	0.729692	1.1541	0.0381923	0.0266006	NA	NA	NA	8.89905	0.000209511	8.48184e-05	0.0420893	0.957065	0.907228	-0.796193	0.0890174	0.0605676	0.852991	0.157331	0.0532322	1.69191	5.44239e-05	1.52069e-05	0.120847	0.906103	0.815578	-0.742651	0.0722811	0.023361
C10090_1867	mmu_circ_0000724	mmu_circ_0000724	0.267558	0.769374	0.598288	-0.580941	0.266835	0.216184	-0.529432	0.587761	0.366492	-9.28031	1.76255e-06	4.52174e-07	-0.217381	0.889615	0.730658	1.13686	0.0486803	0.0315354	NA	NA	NA	9.03645	2.70505e-05	6.69238e-06	-0.972416	0.165079	0.0659304	-0.510145	0.572642	0.342748
C10090_10849	mmu_circ_0000725	mmu_circ_0000725	8.84549	0.00028858	2.48656e-05	10.167	8.305e-11	1.17085e-11	0.511563	0.555746	0.332922	1.63692	0.00259877	0.00145005	-0.36938	0.503738	0.254492	0.203864	0.591714	0.51032	0.839121	0.0158545	0.0039835	1.05475	0.000665186	0.00028514	-0.411628	0.394802	0.206446	-0.723025	0.0264675	0.0075871
C10090_6202	mmu_circ_0000726	mmu_circ_0000726	NA	NA	NA	9.83684	1.15025e-08	2.0654e-09	NA	NA	NA	9.48402	2.7898e-06	7.42718e-07	-0.35101	0.591415	0.332724	-0.925447	0.0471898	0.0304828	-0.276271	0.712992	0.473094	-9.48402	1.09739e-06	1.89373e-07	-8.91139	0.000188371	1.17009e-05	NA	NA	NA
C10090_3432	mmu_circ_0000731	mmu_circ_0000731	-0.0951944	0.920059	0.840782	0.452936	0.477407	0.415	-1.11788	0.0589923	0.0192373	0.515739	0.274742	0.221244	0.492105	0.282482	0.108966	0.279774	0.480021	0.400706	-0.401969	0.366203	0.161304	0.106843	0.777468	0.716484	0.318753	0.517169	0.31123	-0.479695	0.281109	0.120873
C10090_8195	mmu_circ_0000732	mmu_circ_0000732	0.830721	0.0262614	0.0086156	-0.554975	0.10806	0.0803188	-0.4993	0.449713	0.240998	-1.12878	0.00474144	0.002824	0.193278	0.825851	0.634946	-0.680789	0.230294	0.172225	0.801626	0.163548	0.056053	-9.06905	3.5478e-05	9.18352e-06	0.260143	0.807408	0.644744	NA	NA	NA
C10090_6945	mmu_circ_0000734	mmu_circ_0000734	0.572102	0.363881	0.194161	0.323199	0.741987	0.69448	-0.00640105	0.958071	0.91382	0.608112	0.307478	0.250312	-0.401554	0.616163	0.354448	-0.0476002	0.938024	0.917448	-1.18328	0.0229526	0.00590114	-0.599784	0.223301	0.164884	0.268351	0.731256	0.53972	0.822591	0.147404	0.0530264
C10090_16111	mmu_circ_0000735	mmu_circ_0000735	NA	NA	NA	8.87744	9.78245e-05	3.61748e-05	NA	NA	NA	8.89905	0.000207705	8.48184e-05	-8.87744	8.81808e-05	2.23288e-06	-0.643818	0.335198	0.264558	-0.575775	0.505665	0.26709	-0.4032	0.572344	0.488622	-8.23362	0.00348213	0.000822422	0.145835	0.928534	0.8366
C10090_12052	mmu_circ_0000737	mmu_circ_0000737	-9.40003	4.38137e-06	1.2076e-07	0.2145	0.883193	0.857638	-0.690216	0.368835	0.181749	-0.927235	0.0483886	0.0337922	0.10075	0.909106	0.78658	-9.61453	5.96973e-08	7.47746e-09	1.34236	0.00836421	0.00174691	-8.70667	0.000338461	0.000122124	NA	NA	NA	NA	NA	NA
C10090_602	mmu_circ_0000738	mmu_circ_0000738	8.30469	0.00331066	0.000689242	8.16692	0.00355506	0.00202156	8.40301	0.0034225	0.000745636	9.4227	4.86321e-06	1.34287e-06	1.0457	0.137676	0.0433806	1.13686	0.0486957	0.0315354	0.00733877	0.98325	0.964152	-0.579088	0.311841	0.241434	-0.262122	0.754059	0.567236	-8.84361	0.000464558	3.40588e-05
C10090_12241	mmu_circ_0000741	mmu_circ_0000741	0.440146	0.113118	0.0451018	0.858204	0.000876803	0.000432194	0.66489	0.00607788	0.00166406	1.18226	1.1523e-06	2.85476e-07	0.320372	0.134861	0.042218	1.23778	3.51388e-17	1.31824e-18	-0.151618	0.533438	0.28811	1.90272	1.59735e-54	1.76091e-56	-0.396791	0.00498415	0.00132667	-1.15363	1.69987e-25	5.61012e-28
C10090_910	mmu_circ_0000750	mmu_circ_0000750	1.85905	3.1015e-08	4.14972e-10	0.539626	0.338382	0.279636	0.195799	0.608659	0.387144	-0.211216	0.386826	0.324866	0.177313	0.79085	0.566854	1.33818	1.8235e-06	3.27468e-07	-0.346804	0.488431	0.249622	1.34475	8.53802e-07	1.41365e-07	-0.487154	0.0977107	0.0346626	-0.355028	0.222067	0.0877902
C10090_9912	mmu_circ_0000751	mmu_circ_0000751	1.66384	0.00067107	7.63192e-05	1.3886	0.00687368	0.0044193	0.601929	0.149166	0.0560722	-0.158773	0.568755	0.504934	-0.543734	0.304884	0.121406	1.20382	3.756e-05	9.44004e-06	-0.49875	0.417634	0.195384	1.51968	3.01131e-06	5.68172e-07	-0.935317	0.00229382	0.000435576	-0.218724	0.567577	0.337576
C10090_10889	mmu_circ_0000765	mmu_circ_0000765	-9.52552	1.41788e-06	2.84562e-08	-9.52552	1.1462e-08	2.0746e-09	NA	NA	NA	NA	NA	NA	NA	NA	NA	NA	NA	NA	8.2075	0.00523879	0.000860002	NA	NA	NA	NA	NA	NA	NA	NA	NA
C10090_9707	mmu_circ_0000783	mmu_circ_0000783	-9.26256	1.40818e-05	5.12476e-07	-9.26256	2.61638e-07	5.68054e-08	NA	NA	NA	8.89905	0.000212163	8.48184e-05	NA	NA	NA	NA	NA	NA	0.893573	0.127576	0.0410866	-8.89905	0.000107681	3.34892e-05	NA	NA	NA	NA	NA	NA
C10090_15469	mmu_circ_0000795	mmu_circ_0000795	NA	NA	NA	NA	NA	NA	NA	NA	NA	NA	NA	NA	7.94953	0.00585109	0.00132029	NA	NA	NA	8.08215	0.00760438	0.00156122	NA	NA	NA	NA	NA	NA	NA	NA	NA
C10090_458	mmu_circ_0000800	mmu_circ_0000800	-0.550819	0.203982	0.0915382	0.112825	0.946418	0.9336	0.126945	0.768325	0.592598	0.156496	0.900087	0.875728	-0.010538	0.987675	0.963674	0.73256	0.00398501	0.00220164	-0.0133573	0.968477	0.907998	1.8039	1.21212e-12	7.63196e-14	0.0086355	0.992935	0.987776	-0.513792	0.0235098	0.00661732
C10090_15984	mmu_circ_0000803	mmu_circ_0000803	0.963203	7.72225e-17	5.57936e-19	0.967111	8.06592e-14	8.90512e-15	0.00139533	0.744667	0.540992	0.0878023	0.944578	0.930654	-0.00157978	0.993972	0.980982	-0.137029	0.177526	0.128868	-0.276397	0.0119924	0.00252222	-0.133786	0.252542	0.190169	0.226629	0.0531641	0.0172903	0.25609	0.0547103	0.0170631
C10090_4994	mmu_circ_0000804	mmu_circ_0000804	0.764644	0.0640911	0.023376	0.221671	0.855418	0.823118	0.292766	0.510985	0.292174	-0.403857	0.226551	0.178051	0.0681991	0.934276	0.840028	0.351936	0.356995	0.284542	-0.17687	0.802072	0.598706	0.187867	0.695024	0.621794	-0.397259	0.433277	0.238026	0.2564	0.7179	0.506524
C10090_360	mmu_circ_0000805	mmu_circ_0000805	-1.28361	1.42806e-05	5.23534e-07	-0.35582	0.0297001	0.020375	-0.369482	0.469281	0.257752	-0.527285	0.0342993	0.0236058	-0.00184158	0.996239	0.989526	1.25113	4.00702e-11	3.03114e-12	0.877095	0.00279989	0.000388874	1.98193	1.81332e-19	5.95854e-21	-0.161003	0.483803	0.277438	-0.11143	0.643816	0.410998
C10090_6759	mmu_circ_0000806	mmu_circ_0000806	NA	NA	NA	NA	NA	NA	NA	NA	NA	NA	NA	NA	NA	NA	NA	8.23362	0.000997576	0.00044214	NA	NA	NA	NA	NA	NA	-8.23362	0.003528	0.000822422	NA	NA	NA
C10090_2084	mmu_circ_0000807	mmu_circ_0000807	NA	NA	NA	NA	NA	NA	NA	NA	NA	NA	NA	NA	NA	NA	NA	NA	NA	NA	7.94486	0.0128261	0.00283418	NA	NA	NA	NA	NA	NA	NA	NA	NA
C10090_11588	mmu_circ_0000808	mmu_circ_0000808	NA	NA	NA	9.40812	1.44935e-06	3.64344e-07	NA	NA	NA	8.2211	0.00483038	0.00296306	-0.256847	0.7698	0.534474	-9.40812	5.87684e-07	9.14416e-08	1.40168	0.0215616	0.005521	-8.2211	0.00305325	0.00162404	NA	NA	NA	NA	NA	NA
C10090_15481	mmu_circ_0000813	mmu_circ_0000813	-0.327863	0.503938	0.30773	-0.88063	0.00386556	0.00231394	0.170328	0.674202	0.461286	-0.704223	0.037964	0.0262198	-0.231902	0.778274	0.54449	0.75638	0.0412072	0.0262128	0.290613	0.704581	0.459714	1.40457	3.38792e-05	8.70502e-06	0.115528	0.853583	0.715284	-0.473424	0.18538	0.0710578
C10090_6532	mmu_circ_0000814	mmu_circ_0000814	-0.618647	0.365383	0.196233	-0.949226	0.0357299	0.0247756	-9.11035	0.000142969	8.19464e-06	-9.11035	7.88462e-06	2.2639e-06	-8.51491	0.000619718	3.999e-05	0.203793	0.765377	0.70544	7.94486	0.0117796	0.00283418	NA	NA	NA	-8.7187	0.000529673	4.82886e-05	NA	NA	NA
C10090_9750	mmu_circ_0000815	mmu_circ_0000815	0.0866088	0.838979	0.689458	0.00476022	0.642381	0.588728	-0.835549	0.0269007	0.00810614	0.119957	0.946218	0.932894	0.155479	0.734595	0.48483	-0.485231	0.0911855	0.0622484	-0.11888	0.759687	0.537556	-1.0189	0.000808113	0.000350348	0.612322	0.0612501	0.0203974	0.658343	0.104858	0.0354716
C10090_759	mmu_circ_0000816	mmu_circ_0000816	NA	NA	NA	8.61434	0.000468108	0.000202882	NA	NA	NA	8.59954	0.00100419	0.00050132	-0.401481	0.727672	0.475208	-0.243654	0.750457	0.685688	-0.392039	0.711672	0.471178	-8.59954	0.000590478	0.000233212	-8.37069	0.00233209	0.000404838	NA	NA	NA
C10090_4956	mmu_circ_0000817	mmu_circ_0000817	NA	NA	NA	NA	NA	NA	NA	NA	NA	8.2211	0.0047705	0.00296306	7.94953	0.00601437	0.00132029	8.23362	0.00100548	0.00044214	0.208931	0.903883	0.775134	-8.2211	0.00302193	0.00162404	-8.23362	0.00360469	0.000822422	8.40088	0.0034902	0.000765178
C10090_3749	mmu_circ_0000818	mmu_circ_0000818	1.56776	0.00217698	0.000435746	4.03386	3.2477e-41	9.06398e-43	0.640603	0.200936	0.0808998	3.63675	5.90481e-49	1.41612e-50	0.634456	8.45341e-06	9.66696e-08	-0.0113018	0.942178	0.922284	-0.469051	0.00104313	8.8017e-05	-0.509178	0.000411991	0.000159748	0.508579	0.001112	0.000132893	0.31811	0.0931747	0.0310802
C10090_5218	mmu_circ_0000819	mmu_circ_0000819	NA	NA	NA	NA	NA	NA	NA	NA	NA	8.70667	0.000602103	0.000277272	8.21286	0.00234542	0.000348676	NA	NA	NA	-0.499166	0.610427	0.35825	-0.348237	0.651286	0.575208	NA	NA	NA	-8.35843	0.00324217	0.000636664
C10090_7376	mmu_circ_0000820	mmu_circ_0000820	NA	NA	NA	NA	NA	NA	NA	NA	NA	NA	NA	NA	NA	NA	NA	NA	NA	NA	NA	NA	NA	8.35843	0.00118114	0.000572918	NA	NA	NA	-8.35843	0.0031477	0.000636664
C10090_11488	mmu_circ_0000821	mmu_circ_0000821	NA	NA	NA	8.51491	0.000751284	0.000360456	NA	NA	NA	8.2211	0.00483385	0.00296306	-0.30205	0.809476	0.596404	-8.51491	0.00045219	0.000167231	0.40168	0.755063	0.53255	0.400216	0.602756	0.518802	8.45656	0.00187026	0.000298164	0.127544	0.934792	0.854138
C10090_9199	mmu_circ_0000823	mmu_circ_0000823	NA	NA	NA	NA	NA	NA	NA	NA	NA	NA	NA	NA	7.94953	0.00641414	0.00132029	NA	NA	NA	8.08215	0.00846557	0.00156122	NA	NA	NA	NA	NA	NA	NA	NA	NA
C10090_4415	mmu_circ_0000831	mmu_circ_0000831	NA	NA	NA	NA	NA	NA	NA	NA	NA	NA	NA	NA	8.79766	0.000189453	6.42212e-06	NA	NA	NA	NA	NA	NA	8.84361	9.76343e-05	2.94952e-05	NA	NA	NA	-8.84361	0.000436488	3.40588e-05
C10090_7283	mmu_circ_0000836	mmu_circ_0000836	-0.47355	0.647838	0.45021	-0.474052	0.359271	0.300068	-8.56986	0.00200983	0.00031484	-8.56986	0.000299958	0.000126979	-8.16692	0.00253705	0.000348152	0.444846	0.534156	0.453124	NA	NA	NA	NA	NA	NA	-8.61176	0.000854618	9.80974e-05	NA	NA	NA
C10090_6451	mmu_circ_0000838	mmu_circ_0000838	-1.13705	0.0213584	0.00684132	-0.362148	0.201729	0.15909	0.691356	0.222756	0.0923502	-9.11035	7.89066e-06	2.2639e-06	-0.379478	0.577781	0.319744	-0.708832	0.140826	0.100149	9.43003	5.69151e-06	6.18126e-08	9.12386	1.37324e-05	3.18782e-06	0.265101	0.770932	0.587576	0.675419	0.302184	0.134779
C10090_3711	mmu_circ_0000840	mmu_circ_0000840	NA	NA	NA	9.16717	1.2043e-05	3.63044e-06	-8.91767	0.000410179	3.52658e-05	-0.559239	0.312589	0.25633	-0.147021	0.880827	0.73693	-0.00780041	0.995178	0.992934	0.656705	0.479875	0.243746	0.485176	0.490138	0.40618	-9.15937	4.01992e-05	1.39567e-06	-0.201917	0.843009	0.694956
C10090_1499	mmu_circ_0000842	mmu_circ_0000842	NA	NA	NA	NA	NA	NA	NA	NA	NA	NA	NA	NA	NA	NA	NA	NA	NA	NA	NA	NA	NA	NA	NA	NA	8.45656	0.00192737	0.000298164	NA	NA	NA
C10090_6433	mmu_circ_0000843	mmu_circ_0000843	-0.32466	0.590262	0.390612	-0.796823	0.0235039	0.0159168	0.307283	0.633259	0.414244	-0.21126	0.577679	0.514382	-0.515946	0.515002	0.2646	0.487654	0.298631	0.23135	0.0131021	0.989765	0.974468	0.667693	0.181062	0.13047	-1.26232	0.0288477	0.00865296	-0.473471	0.472745	0.255318
C10090_14127	mmu_circ_0000844	mmu_circ_0000844	-0.832321	0.0704168	0.025947	1.03004	0.00128912	0.000672204	0.215106	0.629634	0.40977	1.22006	0.000172505	6.79014e-05	0.300969	0.311475	0.124921	0.0782961	0.777299	0.719296	-0.0242135	0.930912	0.831366	-0.168595	0.545843	0.463336	-0.177195	0.621548	0.413974	0.226938	0.587566	0.355836
C10090_7538	mmu_circ_0000845	mmu_circ_0000845	8.65284	0.000713288	9.3909e-05	NA	NA	NA	NA	NA	NA	9.1472	4.19709e-05	1.43504e-05	9.15127	1.76121e-05	2.30176e-07	8.81826	3.74016e-05	9.63792e-06	-0.524421	0.507639	0.26474	0.137041	0.820812	0.765998	-0.246131	0.808008	0.649422	-0.642555	0.408283	0.205874
C10090_13955	mmu_circ_0000846	mmu_circ_0000846	8.16742	0.00483159	0.00133945	10.0296	7.32625e-10	1.16667e-10	0.0556461	0.9281	0.844948	1.01127	0.0883038	0.063979	-0.116375	0.884777	0.718012	-10.0296	1.70112e-10	1.42981e-11	0.00379385	0.978552	0.955458	-9.7065	1.03501e-07	1.42405e-08	NA	NA	NA	NA	NA	NA
C10090_5174	mmu_circ_0000847	mmu_circ_0000847	-0.39487	0.51201	0.314714	-9.94061	2.03995e-11	2.7671e-12	-0.0223712	0.970743	0.9359	-9.35843	8.40322e-07	2.02084e-07	NA	NA	NA	NA	NA	NA	NA	NA	NA	NA	NA	NA	NA	NA	NA	NA	NA	NA
C10090_93	mmu_circ_0000860	mmu_circ_0000860	0.0995545	0.779582	0.612484	1.16675	3.39398e-08	6.47732e-09	-0.206821	0.754218	0.54898	1.19884	3.08844e-08	5.93226e-09	0.00954865	0.979344	0.947546	0.521816	0.00021264	6.90926e-05	0.162593	0.538608	0.292252	0.608716	2.671e-05	6.55152e-06	0.0324511	0.91158	0.822876	-0.235672	0.138321	0.0490418
C10090_12022	mmu_circ_0000861	mmu_circ_0000861	-0.807932	0.0252727	0.00824388	-0.793645	0.00273048	0.0015353	-0.614177	0.143132	0.0534056	-0.5946	0.0208993	0.0139742	0.973252	0.00268607	0.000327462	0.836093	0.00697089	0.00397132	0.10693	0.898365	0.764398	0.228356	0.522757	0.440636	-0.636356	0.0767453	0.0262464	-0.352073	0.438917	0.228874
C10090_5696	mmu_circ_0000863	mmu_circ_0000863	8.65284	0.00073418	9.3909e-05	9.66178	1.00792e-07	2.05804e-08	-8.69523	0.00122025	0.000151767	1.11084	0.051778	0.0363414	-0.44916	0.501694	0.25264	-0.226733	0.651546	0.57421	-0.229204	0.729282	0.497002	-9.80607	3.14875e-08	3.90506e-09	-0.978485	0.137251	0.0528062	9.18933	9.0509e-05	4.03258e-06
C10090_13565	mmu_circ_0000864	mmu_circ_0000864	-0.618647	0.36593	0.196233	1.39322	0.000291741	0.000124228	-0.507932	0.594981	0.373974	1.89825	2.49127e-07	5.59098e-08	-0.396698	0.304881	0.121342	-0.991626	0.00205363	0.000990186	-0.207649	0.557512	0.307866	-0.605629	0.0307702	0.019074	0.560636	0.22329	0.09556	0.0976443	0.896345	0.774846
C10090_4391	mmu_circ_0000865	mmu_circ_0000865	NA	NA	NA	9.02956	3.44718e-05	1.14599e-05	NA	NA	NA	NA	NA	NA	-0.9421	0.221073	0.079274	-0.795944	0.209971	0.155433	8.62278	0.00096473	7.91852e-05	8.9431	5.10966e-05	1.40497e-05	-8.23362	0.00361592	0.000822422	-0.542221	0.563285	0.332766
C10090_15320	mmu_circ_0000866	mmu_circ_0000866	NA	NA	NA	9.99308	1.25631e-09	2.0728e-10	-9.11035	0.000141594	8.19464e-06	1.11075	0.0223161	0.0150051	-0.117331	0.885006	0.719282	-0.689299	0.10892	0.075427	-1.13895	0.00957027	0.0020048	-0.725249	0.0847844	0.0566188	-0.431876	0.57723	0.364688	-0.306525	0.69797	0.47716
C10090_6122	mmu_circ_0000867	mmu_circ_0000867	0.557064	0.444568	0.254464	2.04721	1.54556e-06	3.9297e-07	-0.0962729	0.970123	0.936112	1.85913	2.70624e-07	6.08532e-08	-0.0587482	0.922068	0.808716	-0.183211	0.570865	0.489998	-0.129571	0.72463	0.492016	-0.0456682	0.882844	0.845224	-0.570196	0.163241	0.0650034	-0.238343	0.523804	0.297094
C10090_9991	mmu_circ_0000868	mmu_circ_0000868	NA	NA	NA	NA	NA	NA	NA	NA	NA	NA	NA	NA	8.21286	0.00243576	0.000348676	8.81826	3.79756e-05	9.63792e-06	NA	NA	NA	9.68018	6.39721e-08	8.44914e-09	0.375509	0.661699	0.459782	0.215392	0.7974	0.61337
C10090_4750	mmu_circ_0000870	mmu_circ_0000870	-0.17612	0.731541	0.553794	-10.722	2.07338e-19	1.50196e-20	-0.481567	0.349363	0.166322	-10.7828	1.6187e-17	1.29638e-18	NA	NA	NA	NA	NA	NA	NA	NA	NA	NA	NA	NA	NA	NA	NA	NA	NA	NA
C10090_16039	mmu_circ_0000871	mmu_circ_0000871	8.54574	0.00113667	0.0001825	NA	NA	NA	NA	NA	NA	NA	NA	NA	NA	NA	NA	NA	NA	NA	NA	NA	NA	NA	NA	NA	NA	NA	NA	NA	NA	NA
C10090_9232	mmu_circ_0000872	mmu_circ_0000872	NA	NA	NA	NA	NA	NA	NA	NA	NA	NA	NA	NA	NA	NA	NA	NA	NA	NA	NA	NA	NA	8.49586	0.000663546	0.000272902	NA	NA	NA	-8.49586	0.0021154	0.00030619
C10090_226	mmu_circ_0000873	mmu_circ_0000873	NA	NA	NA	NA	NA	NA	NA	NA	NA	NA	NA	NA	8.32823	0.00161002	0.000179183	8.23362	0.0010285	0.00044214	NA	NA	NA	8.62132	0.000353214	0.000129993	-0.0398479	0.96856	0.94271	-0.0950157	0.934175	0.847188
C10090_11496	mmu_circ_0000874	mmu_circ_0000874	NA	NA	NA	10.38	1.71881e-12	2.09516e-13	-8.69523	0.00116799	0.000151767	1.41343	0.00634354	0.00405456	-0.845336	0.038151	0.00985522	-0.111018	0.774518	0.714976	-0.485871	0.344216	0.146083	-0.317492	0.473493	0.390378	1.14192	0.00020818	1.34231e-05	1.39811	0.000139373	6.30826e-06
C10090_13787	mmu_circ_0000876	mmu_circ_0000876	-0.902479	0.193301	0.085607	0.419114	0.552559	0.491554	0.0396065	0.932066	0.860748	0.258154	0.819923	0.780776	-0.12433	0.887774	0.726608	0.585687	0.114543	0.0797436	0.682999	0.283631	0.112967	1.63969	3.87836e-05	1.03681e-05	0.261994	0.599758	0.388412	-0.341106	0.444533	0.232746
C10090_4835	mmu_circ_0000877	mmu_circ_0000877	NA	NA	NA	8.29278	0.0020868	0.00113783	8.40301	0.00339647	0.000745636	8.2211	0.00477896	0.00296306	-8.29278	0.00160923	0.000169237	0.203473	0.78253	0.72526	-8.2211	0.00226297	0.000300122	0.400216	0.602311	0.518802	-0.16489	0.898925	0.779394	-0.22044	0.84432	0.694842
C10090_16087	mmu_circ_0000878	mmu_circ_0000878	-0.0576373	0.938338	0.884604	0.473313	0.312186	0.256194	0.431912	0.265901	0.115416	-0.0926402	0.629362	0.568572	-0.57458	0.135035	0.0423002	-10.6618	3.48919e-16	1.49496e-17	-0.238985	0.679614	0.429372	-10.1471	2.54672e-10	2.2082e-11	NA	NA	NA	8.64169	0.00148987	0.000206166
C10090_9198	mmu_circ_0000879	mmu_circ_0000879	-0.400126	0.429264	0.242832	-0.267785	0.254282	0.204396	-0.251601	0.771189	0.589228	0.118823	0.965679	0.957818	-0.437431	0.430909	0.198428	-1.34644	0.00296807	0.00153575	-0.413829	0.380137	0.168632	-10.3585	6.56852e-12	4.55354e-13	-0.387339	0.700975	0.504954	NA	NA	NA
C10090_4069	mmu_circ_0000880	mmu_circ_0000880	NA	NA	NA	NA	NA	NA	NA	NA	NA	8.2211	0.00480453	0.00296306	NA	NA	NA	NA	NA	NA	-8.2211	0.00230286	0.000300122	-8.2211	0.00303992	0.00162404	NA	NA	NA	NA	NA	NA
C10090_9790	mmu_circ_0000881	mmu_circ_0000881	-0.497335	0.341995	0.178456	-0.354936	0.19535	0.153298	-0.221233	0.846978	0.688376	-0.158773	0.568896	0.504934	-0.260374	0.723049	0.471156	-9.79507	5.75806e-09	6.11454e-10	0.125761	0.907158	0.780406	-9.7065	1.05121e-07	1.42405e-08	NA	NA	NA	NA	NA	NA
C10090_14932	mmu_circ_0000882	mmu_circ_0000882	-9.46414	2.60792e-06	5.86206e-08	-0.849796	0.053623	0.0380082	8.26538	0.0054519	0.00143958	8.80607	0.000350956	0.000153355	-0.286116	0.812476	0.602098	-8.61434	0.000262786	8.94268e-05	0.138499	0.930406	0.827222	0.317797	0.613394	0.53433	NA	NA	NA	-0.597559	0.479079	0.261562
C10090_1390	mmu_circ_0000884	mmu_circ_0000884	NA	NA	NA	NA	NA	NA	NA	NA	NA	NA	NA	NA	NA	NA	NA	8.37069	0.00053516	0.000205704	8.71012	0.000725173	4.36194e-05	NA	NA	NA	-8.37069	0.00232261	0.000404838	8.64169	0.0015645	0.000206166
C10090_788	mmu_circ_0000889	mmu_circ_0000889	NA	NA	NA	8.7077	0.000276841	0.00011419	NA	NA	NA	NA	NA	NA	-8.7077	0.000257079	9.4495e-06	-0.21145	0.773772	0.715398	NA	NA	NA	NA	NA	NA	-0.0396948	0.969446	0.93762	9.26327	5.5845e-05	2.0932e-06
C10090_11456	mmu_circ_0000890	mmu_circ_0000890	NA	NA	NA	9.61453	1.72824e-07	3.6565e-08	NA	NA	NA	8.80607	0.000355793	0.000153355	-0.73893	0.22072	0.0790572	0.723208	0.0529949	0.0345912	0.986561	0.0872049	0.0261906	0.47818	0.418304	0.338492	-1.00659	0.0216424	0.00634346	0.61133	0.336737	0.157652
C10090_13966	mmu_circ_0000891	mmu_circ_0000891	NA	NA	NA	8.87744	9.84253e-05	3.61748e-05	NA	NA	NA	9.2211	2.47589e-05	7.93702e-06	1.27396	0.00477009	0.000950706	1.12143	0.0112036	0.00658022	-0.0746623	0.924446	0.819606	0.400216	0.442318	0.360268	-0.667732	0.208114	0.0872468	0.568011	0.313408	0.142593
C10090_5105	mmu_circ_0000892	mmu_circ_0000892	0.942239	0.0464704	0.0162404	3.81366	1.66256e-53	3.30942e-55	0.3401	0.579273	0.35717	3.66484	9.59539e-48	2.36454e-49	-0.245196	0.124404	0.0382332	0.322842	0.00791611	0.00454876	-0.195946	0.206159	0.0753504	0.480668	9.73156e-05	2.99766e-05	0.186917	0.208125	0.0873004	0.451458	0.00017839	1.02189e-05
C10090_15925	mmu_circ_0000894	mmu_circ_0000894	NA	NA	NA	8.29278	0.00205205	0.00113783	NA	NA	NA	8.80607	0.000348849	0.000153355	-0.0799206	0.951913	0.888348	-8.29278	0.00123814	0.000584804	-0.376032	0.700089	0.456052	0.47818	0.417976	0.338492	8.33136	0.00277491	0.000587228	-0.883366	0.239472	0.0981146
C10090_9700	mmu_circ_0000896	mmu_circ_0000896	0.200259	0.669384	0.474856	-0.370462	0.144177	0.109442	-0.0488912	0.988111	0.965292	0.0155548	0.809636	0.768842	0.727493	0.0390419	0.0101252	-10.0296	1.71366e-10	1.42981e-11	-0.127002	0.790993	0.582176	-1.73743	2.72262e-05	6.93208e-06	9.91618	2.24705e-08	1.96365e-10	-8.9431	0.000256396	1.63798e-05
C10090_10693	mmu_circ_0000897	mmu_circ_0000897	-0.38461	0.618213	0.41705	-0.522588	0.193068	0.150714	-1.00334	0.132522	0.0483776	-0.533116	0.18528	0.143577	-0.789975	0.357806	0.151832	-8.87744	5.1952e-05	1.36749e-05	-0.691283	0.346137	0.147477	-9.2211	1.14001e-05	2.51832e-06	NA	NA	NA	NA	NA	NA
C10090_5860	mmu_circ_0000898	mmu_circ_0000898	0.445465	0.62906	0.429922	-8.40003	0.000239046	9.74236e-05	-0.24495	0.851593	0.70042	-1	0.0589439	0.0416952	NA	NA	NA	NA	NA	NA	-0.276282	0.814884	0.621034	-8.35843	0.00168553	0.000850448	NA	NA	NA	8.5263	0.00226763	0.000397182
C10090_8389	mmu_circ_0000899	mmu_circ_0000899	1.25264	0.0326957	0.0109977	0.477412	0.612989	0.556508	-0.550028	0.426098	0.223482	-1.79612	0.00027659	0.000113861	-8.87744	0.000101245	2.23288e-06	-0.158733	0.819527	0.769294	-0.138955	0.911798	0.786302	0.274751	0.726646	0.6621	0.0600301	0.969625	0.923136	0.615542	0.508161	0.284388
C10090_12853	mmu_circ_0000901	mmu_circ_0000901	-0.680161	0.390724	0.214548	0.297504	0.77126	0.729318	0.496324	0.52086	0.300574	0.847804	0.182356	0.140669	0.429037	0.497146	0.248522	1.11809	0.0021716	0.00110984	-0.832914	0.169428	0.0583868	1.24821	0.000557183	0.000218408	-0.162619	0.758171	0.574448	-0.357972	0.399709	0.19976
C10090_5632	mmu_circ_0000909	mmu_circ_0000909	NA	NA	NA	NA	NA	NA	NA	NA	NA	NA	NA	NA	NA	NA	NA	8.23362	0.00100175	0.00044214	NA	NA	NA	8.73674	0.00018533	6.19208e-05	-0.0398479	0.965514	0.94271	0.291995	0.797457	0.614542
C10090_3019	mmu_circ_0000914	mmu_circ_0000914	0.295075	1.25436e-26	6.7132e-29	-3.54745	0	0	0.0871636	4.4669e-05	1.44174e-06	-3.99132	0	0	-0.253114	0.0312162	0.00785982	0.133894	0.217219	0.161868	0.267631	0.0805611	0.024027	-0.20252	0.160405	0.114021	-0.146364	0.260081	0.11708	-0.575269	0.000691601	6.2443e-05
C10090_5660	mmu_circ_0000915	mmu_circ_0000915	0.153191	0.000403144	3.71104e-05	-3.39692	0	0	-0.0755457	0.897857	0.785188	-3.74881	0	0	-0.220567	0.227969	0.08305	0.546011	1.56971e-05	3.55582e-06	0.177475	0.525385	0.283212	-0.528686	0.00559342	0.00315186	-0.100173	0.555696	0.346096	-0.166073	0.60324	0.370448
C10090_11265	mmu_circ_0000917	mmu_circ_0000917	NA	NA	NA	NA	NA	NA	-8.43212	0.00318934	0.000653132	-8.43212	0.000598117	0.000284122	7.94953	0.00618112	0.00132029	NA	NA	NA	7.94486	0.0126351	0.00283418	NA	NA	NA	NA	NA	NA	NA	NA	NA
C10090_14617	mmu_circ_0000918	mmu_circ_0000918	NA	NA	NA	NA	NA	NA	NA	NA	NA	NA	NA	NA	8.5345	0.000667807	4.73206e-05	NA	NA	NA	NA	NA	NA	8.73674	0.000184511	6.19208e-05	8.19377	0.00447193	0.00115653	-8.73674	0.000715272	7.0819e-05
C10090_9716	mmu_circ_0000919	mmu_circ_0000919	NA	NA	NA	NA	NA	NA	NA	NA	NA	NA	NA	NA	NA	NA	NA	NA	NA	NA	NA	NA	NA	NA	NA	NA	8.45656	0.00191858	0.000298164	NA	NA	NA
C10090_1896	mmu_circ_0000925	mmu_circ_0000925	8.43045	0.00186673	0.000354664	9.29255	4.23936e-06	1.1501e-06	-9.43233	1.67393e-05	4.4247e-07	0.274163	0.741604	0.691348	-0.49489	0.524786	0.272306	-0.796297	0.163358	0.117713	-1.49899	0.00818664	0.00148584	-1.34806	0.0139901	0.0083015	-0.302483	0.796214	0.623582	-0.0949275	0.93636	0.859544
C10090_3453	mmu_circ_0000927	mmu_circ_0000927	-1.15922	0.00548469	0.00159536	-0.0561261	0.57207	0.51255	-0.751611	0.231339	0.0970026	0.341315	0.548416	0.484826	-0.136431	0.825426	0.631416	-0.174631	0.645291	0.566316	0.019103	0.994815	0.991698	-1.32209	0.00200492	0.00102265	-0.361629	0.491306	0.285106	1.07482	0.0412262	0.012362
C10090_2423	mmu_circ_0000930	mmu_circ_0000930	NA	NA	NA	8.87744	9.94246e-05	3.61748e-05	NA	NA	NA	8.89905	0.000211697	8.48184e-05	0.20976	0.838325	0.656348	-8.87744	5.2033e-05	1.36749e-05	0.367498	0.708341	0.465274	-8.89905	0.000107389	3.34892e-05	NA	NA	NA	NA	NA	NA
C10090_9836	mmu_circ_0000931	mmu_circ_0000931	9.01542	0.000117163	6.58398e-06	9.40812	1.46127e-06	3.64344e-07	8.52865	0.00224599	0.000386206	9.80607	1.00656e-07	2.12606e-08	1.10225	0.0041396	0.000819974	-9.40812	5.96326e-07	9.14416e-08	0.489129	0.360767	0.158382	-1.18475	0.0219368	0.0133239	NA	NA	NA	-8.62132	0.00128266	0.000147255
C10090_4384	mmu_circ_0000933	mmu_circ_0000933	NA	NA	NA	NA	NA	NA	NA	NA	NA	8.70667	0.000604123	0.000277272	8.71528	0.000288667	1.24969e-05	9.81842	1.05631e-09	9.98278e-11	-8.70667	0.000307788	1.22138e-05	1.68726	0.000173318	5.62538e-05	0.375226	0.494745	0.290724	-0.323269	0.536536	0.30811
C10090_9725	mmu_circ_0000936	mmu_circ_0000936	-0.74736	0.0874364	0.0334116	-2.37046	7.49851e-08	1.50647e-08	0.800069	0.0631603	0.0206668	-9.56986	8.74053e-08	1.80388e-08	-8.02956	0.00398101	0.000716208	-8.02956	0.00385613	0.00204506	NA	NA	NA	NA	NA	NA	NA	NA	NA	NA	NA	NA
C10090_11365	mmu_circ_0000938	mmu_circ_0000938	-0.194526	0.85167	0.731566	-8.84737	1.20237e-05	3.55802e-06	0.621697	0.413214	0.21477	-8.56986	0.000303907	0.000126979	NA	NA	NA	NA	NA	NA	NA	NA	NA	NA	NA	NA	NA	NA	NA	NA	NA	NA
C10090_11556	mmu_circ_0000940	mmu_circ_0000940	NA	NA	NA	8.02956	0.00579932	0.0035917	-8.56986	0.00198515	0.00031484	-8.56986	0.000303587	0.000126979	-8.02956	0.00387972	0.000716208	-8.02956	0.00380756	0.00204506	NA	NA	NA	NA	NA	NA	NA	NA	NA	NA	NA	NA
C10090_7640	mmu_circ_0000945	mmu_circ_0000945	-0.629547	0.172829	0.074737	-0.0707193	0.56198	0.501088	-0.0199741	0.957252	0.91437	0.596007	0.187969	0.145784	0.535449	0.146756	0.0471406	1.21908	5.37716e-06	1.07146e-06	0.375754	0.394465	0.17746	0.222914	0.521259	0.437606	0.0051882	0.999588	0.999352	0.562182	0.0945311	0.0316218
C10090_361	mmu_circ_0000946	mmu_circ_0000946	NA	NA	NA	8.29278	0.00213913	0.00113783	-8.56986	0.00213095	0.00031484	0.236211	0.864606	0.832076	0.582814	0.531691	0.27958	1.52564	0.00236793	0.00121552	-0.723917	0.416884	0.192508	0.47818	0.418633	0.338492	0.223237	0.735038	0.544942	0.564064	0.396176	0.197248
C10090_2295	mmu_circ_0000948	mmu_circ_0000948	0.297228	0.719076	0.528772	-0.773544	0.139744	0.105733	-0.24495	0.851305	0.70042	-9.35843	8.4496e-07	2.02084e-07	-0.217381	0.889394	0.730658	-8.16692	0.00222738	0.0010936	8.08215	0.00833345	0.00156122	NA	NA	NA	NA	NA	NA	8.5263	0.00237637	0.000397182
C10090_14063	mmu_circ_0000950	mmu_circ_0000950	NA	NA	NA	NA	NA	NA	NA	NA	NA	NA	NA	NA	NA	NA	NA	NA	NA	NA	8.08215	0.00779468	0.00156122	NA	NA	NA	NA	NA	NA	NA	NA	NA
C10090_3738	mmu_circ_0000952	mmu_circ_0000952	-0.165514	0.854271	0.730828	-9.33293	1.20169e-07	2.48328e-08	-0.697411	0.323305	0.151217	-0.824198	0.0548803	0.0386396	8.79766	0.000191763	6.42212e-06	9.55536	3.76084e-08	4.57962e-09	0.390949	0.668285	0.417748	1.2591	0.00384652	0.00211938	0.270557	0.694959	0.498486	-0.912188	0.0546778	0.0170401
C10090_25	mmu_circ_0000954	mmu_circ_0000954	NA	NA	NA	9.02956	3.5056e-05	1.14599e-05	NA	NA	NA	8.48422	0.00173166	0.000906406	0.121707	0.911433	0.790082	-0.417801	0.508413	0.4267	0.138565	0.940161	0.849836	-8.48422	0.00101927	0.000445348	0.0673656	0.967954	0.91583	NA	NA	NA
C10090_9268	mmu_circ_0000955	mmu_circ_0000955	NA	NA	NA	NA	NA	NA	NA	NA	NA	8.35843	0.00290727	0.00163882	NA	NA	NA	NA	NA	NA	-8.35843	0.00157036	0.000134799	0.584669	0.387275	0.309278	NA	NA	NA	-8.9431	0.000257345	1.63798e-05
C10090_15142	mmu_circ_0000956	mmu_circ_0000956	0.162576	0.731852	0.551092	-0.112646	0.464715	0.401202	0.549378	0.190922	0.0757526	0.73619	0.0777206	0.0557468	0.751993	0.0119129	0.00280004	-0.855037	0.0243601	0.0149766	-0.303291	0.484297	0.2467	-0.973826	0.00747265	0.00428208	0.329458	0.620518	0.412848	0.720589	0.139316	0.049493
C10090_6312	mmu_circ_0000957	mmu_circ_0000957	NA	NA	NA	9.4625	8.59249e-07	2.0507e-07	8.52865	0.00221023	0.000386206	NA	NA	NA	0.52277	0.345783	0.144753	-0.966248	0.0746228	0.0501004	8.94457	0.000199482	7.29102e-06	8.62132	0.000341985	0.000129993	-8.49625	0.0013787	0.000199283	-0.357815	0.755854	0.548092
C10090_13468	mmu_circ_0000958	mmu_circ_0000958	NA	NA	NA	8.7077	0.000271439	0.00011419	NA	NA	NA	NA	NA	NA	-8.7077	0.000243548	9.4495e-06	-8.7077	0.000151969	4.78212e-05	NA	NA	NA	NA	NA	NA	NA	NA	NA	NA	NA	NA
C10090_10963	mmu_circ_0000960	mmu_circ_0000960	NA	NA	NA	NA	NA	NA	-8.56986	0.0020388	0.00031484	-8.56986	0.000304387	0.000126979	NA	NA	NA	NA	NA	NA	NA	NA	NA	8.9431	5.13738e-05	1.40497e-05	NA	NA	NA	-0.416797	0.664674	0.441706
C10090_1982	mmu_circ_0000963	mmu_circ_0000963	0.727975	0.284596	0.140737	0.651584	0.368315	0.30868	-0.986007	0.0949093	0.0328776	-10.0172	1.95036e-10	2.87082e-11	-0.416956	0.608028	0.34803	-9.29255	1.81589e-06	3.19772e-07	8.32328	0.00330647	0.000473734	9.03645	2.70274e-05	6.69238e-06	NA	NA	NA	-0.510145	0.572416	0.342748
C10090_9403	mmu_circ_0000964	mmu_circ_0000964	0.591451	0.0033442	0.000687274	-0.362206	0.0223982	0.0151267	-1.0901	2.47743e-06	3.58448e-08	-0.905158	9.8811e-08	2.0784e-08	0.0630722	0.887795	0.760164	-0.450416	0.0806416	0.0544554	-0.2209	0.464094	0.230496	-0.426714	0.0852248	0.0570032	0.117012	0.813296	0.662316	-0.618546	0.0593254	0.0186983
C10090_14685	mmu_circ_0000965	mmu_circ_0000965	NA	NA	NA	8.51491	0.000740828	0.000360456	NA	NA	NA	8.80607	0.000351487	0.000153355	-0.565376	0.60812	0.34771	-8.51491	0.000443825	0.000167231	-0.376032	0.700538	0.456052	-8.80607	0.000184955	6.3952e-05	8.45656	0.00180089	0.000298164	NA	NA	NA
C10090_7313	mmu_circ_0000966	mmu_circ_0000966	NA	NA	NA	9.4625	8.5557e-07	2.0507e-07	NA	NA	NA	9.80607	9.97208e-08	2.12606e-08	-0.0798782	0.934169	0.835926	1.03395	0.00443718	0.0024651	-0.325276	0.609938	0.356434	0.552145	0.158568	0.112447	0.462751	0.216404	0.092051	0.605551	0.11831	0.0407476
C10090_12467	mmu_circ_0000967	mmu_circ_0000967	0.370453	0.560058	0.361782	2.87454	8.08327e-24	4.76072e-25	0.354213	0.510635	0.29169	2.32055	1.79962e-14	1.77388e-15	-0.187395	0.464979	0.224276	0.390487	0.013914	0.00826628	-0.102858	0.71673	0.47782	0.211147	0.295693	0.227302	0.113019	0.641921	0.43664	0.0795685	0.843652	0.703242
C10090_4144	mmu_circ_0000968	mmu_circ_0000968	-0.405572	0.50727	0.310036	2.30467	2.54238e-18	1.93561e-19	0.201007	0.662524	0.449978	2.04398	1.10382e-13	1.16818e-14	-0.137071	0.633186	0.370576	0.551177	0.00035577	0.000127342	-0.346291	0.101731	0.0316156	0.0876127	0.681734	0.60499	-0.0209169	0.927928	0.8464	0.245004	0.332763	0.154928
C10090_5160	mmu_circ_0000970	mmu_circ_0000970	8.16742	0.0049413	0.00133945	8.87744	9.87009e-05	3.61748e-05	-0.282243	0.844939	0.703646	-0.326674	0.521129	0.457034	-8.87744	9.42622e-05	2.23288e-06	1.03395	0.0223054	0.0136357	0.386454	0.738572	0.508578	0.458882	0.496624	0.413134	-1.23226	0.0198962	0.00577996	0.583203	0.449633	0.236264
C10090_11006	mmu_circ_0000972	mmu_circ_0000972	NA	NA	NA	8.40812	0.0012599	0.00064042	NA	NA	NA	8.2211	0.00485126	0.00296306	-8.40812	0.00106577	8.22666e-05	1.20383	0.0198713	0.0120906	0.861045	0.309234	0.127104	1.81521	0.000482053	0.000188038	0.652144	0.176268	0.0712316	-0.0506114	0.935865	0.850706
C10090_1948	mmu_circ_0000975	mmu_circ_0000975	NA	NA	NA	9.40812	1.45887e-06	3.64344e-07	NA	NA	NA	9.48402	2.81774e-06	7.42718e-07	0.711472	0.138831	0.0439428	-9.40812	5.94736e-07	9.14416e-08	0.34824	0.643223	0.393618	-9.48402	1.10966e-06	1.89373e-07	NA	NA	NA	NA	NA	NA
C10090_14486	mmu_circ_0000976	mmu_circ_0000976	NA	NA	NA	10.9556	1.59109e-18	1.20482e-19	NA	NA	NA	9.4227	4.76822e-06	1.34287e-06	-1.11842	0.00094597	6.83834e-05	-2.45932	7.48433e-10	6.90436e-11	0.485397	0.453115	0.22334	-9.4227	1.94951e-06	3.61632e-07	-8.49625	0.00137645	0.000199283	NA	NA	NA
C10090_7872	mmu_circ_0000977	mmu_circ_0000977	NA	NA	NA	8.16692	0.00340278	0.00202156	NA	NA	NA	NA	NA	NA	-0.217381	0.887409	0.730658	-8.16692	0.00214326	0.0010936	NA	NA	NA	NA	NA	NA	8.33136	0.00277801	0.000587228	NA	NA	NA
C10090_5539	mmu_circ_0000979	mmu_circ_0000979	NA	NA	NA	8.02956	0.00571599	0.0035917	NA	NA	NA	NA	NA	NA	-8.02956	0.00377532	0.000716208	-8.02956	0.0037673	0.00204506	8.08215	0.00787682	0.00156122	NA	NA	NA	NA	NA	NA	NA	NA	NA
C10090_243	mmu_circ_0000982	mmu_circ_0000982	0.204365	0.752285	0.578154	-0.0752946	0.638468	0.584094	-0.209714	0.841096	0.675638	-0.543732	0.112857	0.0835566	0.347515	0.590155	0.330448	-0.953911	0.0663699	0.0442194	0.0561909	0.974225	0.93292	-0.158244	0.77233	0.711094	1.06737	0.074731	0.025381	-0.232586	0.769515	0.578134
C10090_9210	mmu_circ_0000983	mmu_circ_0000983	-0.158386	0.732817	0.549662	-0.253669	0.149173	0.114031	0.0381407	0.850642	0.697744	0.41394	0.239017	0.190372	0.366149	0.28276	0.109767	-0.412852	0.183466	0.133518	-0.498782	0.0682528	0.0198714	-0.944345	0.000662505	0.00028371	0.534557	0.145144	0.0561172	0.3614	0.445922	0.233578
C10090_2475	mmu_circ_0000985	mmu_circ_0000985	NA	NA	NA	NA	NA	NA	NA	NA	NA	NA	NA	NA	8.21286	0.00242538	0.000348676	NA	NA	NA	8.43003	0.00236194	0.000260958	NA	NA	NA	NA	NA	NA	NA	NA	NA
C10090_11778	mmu_circ_0000986	mmu_circ_0000986	NA	NA	NA	NA	NA	NA	8.75087	0.000890846	0.00010361	NA	NA	NA	NA	NA	NA	NA	NA	NA	8.2075	0.00516001	0.000860002	NA	NA	NA	NA	NA	NA	8.2635	0.00597824	0.00147413
C10090_4318	mmu_circ_0000987	mmu_circ_0000987	-8.52552	0.00120844	0.000166213	0.182183	0.960588	0.953492	NA	NA	NA	8.35843	0.00286809	0.00163882	-0.379478	0.734335	0.483908	-8.7077	0.000152865	4.78212e-05	0.656705	0.479678	0.243746	-8.35843	0.00169694	0.000850448	NA	NA	NA	NA	NA	NA
C10090_4088	mmu_circ_0000989	mmu_circ_0000989	-8.52552	0.00121554	0.000166213	-8.52552	0.000112977	4.25894e-05	NA	NA	NA	NA	NA	NA	NA	NA	NA	NA	NA	NA	7.94486	0.0123589	0.00283418	8.35843	0.0012043	0.000572918	NA	NA	NA	-8.35843	0.00328556	0.000636664
C10090_8854	mmu_circ_0000992	mmu_circ_0000992	0.762924	0.189958	0.0838216	-8.94046	5.5855e-06	1.55541e-06	0.0260165	0.936353	0.875388	0.373731	0.65721	0.597924	9.53469	3.13794e-07	2.17868e-09	NA	NA	NA	-0.14496	0.860992	0.696634	-0.0851192	0.898347	0.863114	8.57213	0.00123983	0.000151392	-0.679978	0.39596	0.196487
C10090_2018	mmu_circ_0000993	mmu_circ_0000993	NA	NA	NA	NA	NA	NA	NA	NA	NA	NA	NA	NA	7.94953	0.00628324	0.00132029	NA	NA	NA	NA	NA	NA	NA	NA	NA	NA	NA	NA	NA	NA	NA
C10090_241	mmu_circ_0000996	mmu_circ_0000996	0.567765	0.141651	0.0586012	2.2482	9.48917e-20	6.73764e-21	0.439903	0.183174	0.0718628	1.59609	3.43855e-10	5.22024e-11	0.252092	0.189419	0.064674	-1.51649	1.52681e-13	8.41966e-15	0.434086	0.018077	0.00456078	-1.04215	1.61102e-06	2.8279e-07	0.687774	0.0113876	0.00317368	0.277028	0.480583	0.26295
C10090_9545	mmu_circ_0000997	mmu_circ_0000997	0.177864	0.697532	0.50621	2.4061	1.27692e-31	4.92634e-33	-0.262274	0.616505	0.395908	1.46334	5.81322e-14	5.9731e-15	-0.0846841	0.722908	0.470916	-1.18725	6.91177e-14	3.66984e-15	-0.191991	0.255992	0.0988038	-0.903969	4.85712e-08	6.21942e-09	0.317236	0.199267	0.0832082	-0.08308	0.778056	0.594272
C10090_103	mmu_circ_0001004	mmu_circ_0001004	0.641897	0.396889	0.21942	-8.52552	0.000114599	4.25894e-05	0.108767	0.846314	0.7095	-0.651763	0.179713	0.138354	NA	NA	NA	NA	NA	NA	-8.70667	0.000321317	1.22138e-05	-8.70667	0.000342689	0.000122124	NA	NA	NA	NA	NA	NA
C10090_11077	mmu_circ_0001005	mmu_circ_0001005	-0.0949704	0.932387	0.86602	-8.94046	5.55683e-06	1.55541e-06	-8.69523	0.00117808	0.000151767	-8.69523	0.000147553	5.67488e-05	8.8756	0.000123371	3.3003e-06	NA	NA	NA	NA	NA	NA	NA	NA	NA	NA	NA	NA	NA	NA	NA
C10090_16002	mmu_circ_0001006	mmu_circ_0001006	-8.26256	0.00279232	0.000705366	-8.26256	0.000480525	0.000222858	8.26538	0.00530651	0.00143958	NA	NA	NA	NA	NA	NA	NA	NA	NA	NA	NA	NA	NA	NA	NA	NA	NA	NA	NA	NA	NA
C10090_701	mmu_circ_0001007	mmu_circ_0001007	NA	NA	NA	8.02956	0.00591096	0.0035917	NA	NA	NA	8.48422	0.00172441	0.000906406	0.183298	0.90405	0.778698	0.204056	0.799527	0.746914	-8.48422	0.000929124	6.05444e-05	-8.48422	0.0010168	0.000445348	-8.23362	0.00378082	0.000822422	9.5263	7.16227e-06	1.51958e-07
C10090_6547	mmu_circ_0001009	mmu_circ_0001009	NA	NA	NA	10.3224	5.14009e-12	6.61366e-13	NA	NA	NA	9.6541	5.32272e-07	1.25661e-07	-0.83655	0.0459754	0.0121863	-10.3224	8.6596e-13	5.11268e-14	0.138529	0.896245	0.75754	-9.6541	1.86445e-07	2.7194e-08	NA	NA	NA	NA	NA	NA
C10090_3131	mmu_circ_0001013	mmu_circ_0001013	-0.301634	0.768787	0.597008	1.21778	0.0154	0.0102203	-0.714215	0.40771	0.210548	-0.0670305	0.756182	0.708598	-0.115466	0.884538	0.716734	-10.0651	9.58787e-11	7.64592e-12	0.653311	0.263309	0.102783	-9.2914	6.46627e-06	1.31875e-06	NA	NA	NA	8.2635	0.00601852	0.00147413
C10090_11737	mmu_circ_0001014	mmu_circ_0001014	-0.24114	0.627628	0.42844	0.621154	0.0680285	0.0489448	-0.312562	0.610088	0.38992	0.238083	0.658545	0.600008	-0.208151	0.592209	0.332566	-1.76576	3.21454e-08	3.82872e-09	0.492734	0.0891841	0.0270458	-1.15453	0.000419062	0.000162756	-0.454795	0.515162	0.309292	-0.252492	0.707194	0.491968
C10090_4568	mmu_circ_0001016	mmu_circ_0001016	NA	NA	NA	8.51491	0.000746812	0.000360456	NA	NA	NA	8.35843	0.00285819	0.00163882	-0.30205	0.809028	0.596404	-0.144224	0.858161	0.818578	0.0716029	0.97661	0.949686	0.925814	0.127288	0.088106	0.823084	0.283573	0.131137	-1.02074	0.169017	0.0628334
C10090_13997	mmu_circ_0001017	mmu_circ_0001017	0.132171	0.797323	0.645198	0.59929	0.129592	0.0972536	0.0920136	0.760227	0.55695	-0.433627	0.08435	0.0608916	-0.541786	0.11993	0.0365642	-1.17859	0.000345717	0.000123531	0.182994	0.772783	0.556184	0.38509	0.232866	0.173033	0.707494	0.110031	0.0399946	-1.0209	0.00486993	0.0011331
C10090_2439	mmu_circ_0001020	mmu_circ_0001020	-8.64097	0.000676052	8.06848e-05	3.53427	1.86124e-28	8.2883e-30	-0.0600185	0.999852	0.997348	2.95861	1.00945e-16	8.4843e-18	-0.129614	0.66429	0.400446	-0.0938541	0.632921	0.553644	0.594709	0.00309233	0.000431428	0.406385	0.038402	0.0241712	0.139116	0.625434	0.417596	0.0416108	0.942433	0.877338
C10090_4721	mmu_circ_0001021	mmu_circ_0001021	NA	NA	NA	NA	NA	NA	NA	NA	NA	NA	NA	NA	NA	NA	NA	NA	NA	NA	NA	NA	NA	NA	NA	NA	NA	NA	NA	8.2635	0.00588818	0.00147413
C10090_4745	mmu_circ_0001022	mmu_circ_0001022	0.64177	0.219131	0.100741	3.11617	1.81587e-30	7.41552e-32	0.155257	0.798517	0.622772	2.82438	4.35637e-22	2.69338e-23	-0.17027	0.471015	0.228342	0.0697036	0.708555	0.63767	-0.0565163	0.81546	0.622836	0.279464	0.106624	0.0726044	-0.17129	0.433869	0.238454	-0.135375	0.554946	0.323784
C10090_14050	mmu_circ_0001023	mmu_circ_0001023	8.16742	0.00481764	0.00133945	8.87744	9.83156e-05	3.61748e-05	NA	NA	NA	8.2211	0.00473527	0.00296306	-8.87744	9.18858e-05	2.23288e-06	1.03395	0.0222979	0.0136357	0.489014	0.681103	0.432304	1.67326	0.00161573	0.000793994	-0.232264	0.720713	0.526662	-0.309213	0.643308	0.410522
C10090_11577	mmu_circ_0001026	mmu_circ_0001026	NA	NA	NA	8.61434	0.000461552	0.000202882	NA	NA	NA	8.2211	0.00483212	0.00296306	0.472856	0.592951	0.33492	-8.61434	0.000266478	8.94268e-05	0.308717	0.82913	0.64713	-8.2211	0.00305446	0.00162404	NA	NA	NA	NA	NA	NA
C10090_6701	mmu_circ_0001028	mmu_circ_0001028	NA	NA	NA	10.6849	2.19105e-15	2.11776e-16	NA	NA	NA	10.5996	4.11832e-13	4.66652e-14	0.112738	0.837608	0.654932	-1.60357	2.89401e-05	7.06002e-06	0.326884	0.46948	0.234348	-1.31539	0.000844631	0.000366538	-0.402222	0.639155	0.432494	0.564064	0.395989	0.197248
C10090_16095	mmu_circ_0001029	mmu_circ_0001029	-0.106608	0.769132	0.597688	-0.480161	0.00213317	0.00118675	-0.382774	0.165277	0.0636918	-1.02339	2.20536e-08	4.18752e-09	0.0115636	0.985056	0.95609	-0.471531	0.0522845	0.0340846	-0.058807	0.869798	0.710662	-0.674366	0.0139228	0.00824978	0.386076	0.234077	0.101559	0.460214	0.235228	0.095655
C10090_12216	mmu_circ_0001030	mmu_circ_0001030	0.0379875	0.942237	0.895592	0.0606869	0.856734	0.824912	-0.471414	0.608777	0.38688	0.754048	0.119955	0.0892342	0.098557	0.892409	0.764662	0.000290573	0.997605	0.9974	0.343325	0.50744	0.266332	0.205924	0.597175	0.512732	0.085864	0.908868	0.81957	-0.936301	0.0294439	0.0085236
C10090_5824	mmu_circ_0001032	mmu_circ_0001032	8.75221	0.000446986	4.83228e-05	8.51491	0.000744281	0.000360456	8.40301	0.00332071	0.000745636	NA	NA	NA	-8.51491	0.000633757	3.999e-05	-8.51491	0.000446742	0.000167231	8.87067	0.00029476	1.32359e-05	9.28425	3.64904e-06	7.2331e-07	8.33136	0.00284151	0.000587228	-0.642555	0.408857	0.205874
C10090_8927	mmu_circ_0001036	mmu_circ_0001036	NA	NA	NA	8.61434	0.000467886	0.000202882	9.11348	0.000147256	7.45704e-06	NA	NA	NA	0.0135569	0.995317	0.985764	0.29705	0.645297	0.566586	8.43003	0.00239821	0.000260958	8.62132	0.000352402	0.000129993	-0.33926	0.721372	0.527314	0.77956	0.311894	0.140948
C10090_6050	mmu_circ_0001039	mmu_circ_0001039	NA	NA	NA	8.40812	0.00124432	0.00064042	NA	NA	NA	8.9867	0.000124251	4.69118e-05	0.307158	0.796804	0.574376	0.590755	0.339089	0.267976	-0.456874	0.602427	0.348396	0.573255	0.280906	0.214446	0.960405	0.0698275	0.0235672	-0.226348	0.768584	0.578884
C10090_8861	mmu_circ_0001042	mmu_circ_0001042	NA	NA	NA	NA	NA	NA	NA	NA	NA	NA	NA	NA	NA	NA	NA	NA	NA	NA	NA	NA	NA	NA	NA	NA	8.33136	0.00302105	0.000587228	8.2635	0.00617299	0.00147413
C10090_3214	mmu_circ_0001043	mmu_circ_0001043	-9.11061	4.54039e-05	2.17482e-06	0.641432	0.288615	0.235488	0.113548	0.869249	0.745416	0.566347	0.408078	0.345856	-0.369422	0.583434	0.324302	0.113687	0.803786	0.75254	0.226273	0.806965	0.60337	0.978587	0.011589	0.00680304	0.560636	0.223536	0.09556	-0.0293321	0.94516	0.881436
C10090_14098	mmu_circ_0001045	mmu_circ_0001045	-0.618647	0.365747	0.196233	1.65286	4.64297e-06	1.27865e-06	0.707784	0.303917	0.137414	2.7738	7.22512e-13	8.47302e-14	0.0653386	0.894054	0.766254	-0.322903	0.244551	0.184341	-0.322717	0.268329	0.105471	-0.303433	0.243232	0.182334	0.0549232	0.930684	0.850672	0.168116	0.728379	0.51615
C10090_9973	mmu_circ_0001046	mmu_circ_0001046	-0.535781	0.169468	0.0729206	0.000247241	0.658212	0.604858	0.440955	0.195589	0.0780942	0.504926	0.192583	0.149702	-0.0166596	0.978858	0.942678	0.722688	0.00303993	0.00157543	0.0244566	0.994091	0.987032	0.178394	0.546551	0.4644	-0.302694	0.326164	0.158768	-0.222289	0.567983	0.337148
C10090_825	mmu_circ_0001047	mmu_circ_0001047	0.120458	0.859777	0.715292	1.02226	0.005168	0.00311586	10.5286	4.23094e-12	2.00128e-14	11.0489	7.72895e-18	6.05392e-19	-0.406705	0.27583	0.105555	-1.48203	1.7715e-05	4.12914e-06	0.0167899	0.99421	0.986942	-0.727193	0.017367	0.0104452	0.244083	0.748814	0.561522	-0.625431	0.194018	0.074918
C10090_8583	mmu_circ_0001048	mmu_circ_0001048	0.489831	0.518876	0.321156	1.86667	2.67075e-05	8.62664e-06	-0.488604	0.551297	0.326422	0.232334	0.781222	0.736188	-0.179376	0.746258	0.50228	-10.6145	1.15392e-15	5.22788e-17	-0.00627074	0.974913	0.929914	-1.36523	0.00568368	0.00320754	8.87191	0.000298601	1.98174e-05	-0.0950157	0.93369	0.847188
C10090_2659	mmu_circ_0001049	mmu_circ_0001049	NA	NA	NA	8.7077	0.000275607	0.00011419	NA	NA	NA	9.1472	4.25458e-05	1.43504e-05	0.312442	0.760902	0.523324	-0.474085	0.50951	0.427934	0.282829	0.772108	0.552796	-0.410465	0.523307	0.440434	1.03035	0.155391	0.0612536	0.11157	0.938915	0.8703
C10090_1986	mmu_circ_0001050	mmu_circ_0001050	NA	NA	NA	8.87744	9.95369e-05	3.61748e-05	NA	NA	NA	9.1472	4.2713e-05	1.43504e-05	-0.664576	0.455245	0.21735	-8.87744	5.21143e-05	1.36749e-05	-0.717171	0.343759	0.14553	-9.1472	2.00392e-05	4.80906e-06	NA	NA	NA	NA	NA	NA
C10090_7118	mmu_circ_0001052	mmu_circ_0001052	-8.40003	0.00192997	0.000342406	-0.370462	0.478637	0.417248	-9.19795	8.06649e-05	3.9502e-06	-0.97685	0.0811371	0.0584294	0.405482	0.747301	0.510002	0.466691	0.532937	0.451434	0.102176	0.967072	0.914558	1.57006	0.00363785	0.00200132	0.28248	0.798378	0.629048	-0.942853	0.107835	0.036733
C10090_10683	mmu_circ_0001057	mmu_circ_0001057	NA	NA	NA	NA	NA	NA	NA	NA	NA	8.35843	0.00288364	0.00163882	NA	NA	NA	NA	NA	NA	-8.35843	0.00152943	0.000134799	-8.35843	0.0017056	0.000850448	NA	NA	NA	NA	NA	NA
C10090_157	mmu_circ_0001060	mmu_circ_0001060	-8.40003	0.0020806	0.000342406	-8.40003	0.000242961	9.74236e-05	NA	NA	NA	NA	NA	NA	NA	NA	NA	8.61176	0.000148868	4.4526e-05	NA	NA	NA	NA	NA	NA	-8.61176	0.000914855	9.80974e-05	8.64169	0.00158148	0.000206166
C10090_15347	mmu_circ_0001061	mmu_circ_0001061	NA	NA	NA	NA	NA	NA	NA	NA	NA	NA	NA	NA	8.08746	0.00388605	0.000678492	NA	NA	NA	NA	NA	NA	NA	NA	NA	NA	NA	NA	NA	NA	NA
C10090_7084	mmu_circ_0001063	mmu_circ_0001063	-0.416918	0.666894	0.47077	-0.554589	0.265751	0.215142	NA	NA	NA	8.80607	0.000350603	0.000153355	0.335117	0.784825	0.554522	-8.29278	0.00124408	0.000584804	-0.376032	0.700313	0.456052	0.0375408	0.954722	0.936708	8.19377	0.00441946	0.00115653	-0.580103	0.552002	0.321546
C10090_13924	mmu_circ_0001064	mmu_circ_0001064	-0.0157751	0.991584	0.983624	-0.128015	0.402013	0.340882	-0.656567	0.0879932	0.0303104	-0.422736	0.0645728	0.0459042	0.479562	0.159974	0.052301	0.0988252	0.780381	0.722468	0.230524	0.651887	0.400962	0.370352	0.21042	0.154257	0.675356	0.0241268	0.00709444	-0.328142	0.381008	0.186282
C10090_4555	mmu_circ_0001065	mmu_circ_0001065	-1.02488	0.0242418	0.0078622	0.117463	0.959365	0.949324	-0.474833	0.555204	0.331516	0.258154	0.728882	0.677884	-0.70778	0.0918015	0.0268262	-0.468636	0.202214	0.14878	-0.160955	0.792206	0.583896	0.137235	0.746319	0.684772	0.0895939	0.905618	0.814072	-0.0950157	0.875189	0.74356
C10090_9879	mmu_circ_0001066	mmu_circ_0001066	8.43045	0.001872	0.000354664	NA	NA	NA	NA	NA	NA	NA	NA	NA	7.94953	0.00633868	0.00132029	8.23362	0.00101878	0.00044214	NA	NA	NA	NA	NA	NA	0.0977452	0.957381	0.889546	NA	NA	NA
C10090_548	mmu_circ_0001067	mmu_circ_0001067	-8.40003	0.0020605	0.000342406	1.98	5.58819e-05	1.93689e-05	8.64422	0.00147928	0.000200036	9.7065	3.08178e-07	6.9501e-08	0.397474	0.328942	0.134143	-1.14665	0.00337995	0.00175996	0.530953	0.325226	0.135171	-0.210641	0.691197	0.616758	0.847837	0.0945429	0.0333602	-0.647545	0.356668	0.169926
C10090_15607	mmu_circ_0001068	mmu_circ_0001068	NA	NA	NA	8.7077	0.000269206	0.00011419	NA	NA	NA	8.89905	0.000208041	8.48184e-05	0.826988	0.184353	0.0623418	1.56131	0.000322901	0.000114716	0.116081	0.943426	0.857714	2.69186	3.4766e-15	1.54778e-16	-0.443097	0.372964	0.192384	-0.30968	0.304784	0.137088
C10090_16099	mmu_circ_0001070	mmu_circ_0001070	NA	NA	NA	10.6145	1.16688e-14	1.18771e-15	NA	NA	NA	10.4841	3.98335e-12	4.98686e-13	-0.0798339	0.887607	0.759278	-0.417678	0.21278	0.157993	-0.246669	0.611857	0.362284	-0.640511	0.0902544	0.0606926	0.166739	0.788346	0.61202	0.905089	0.0236468	0.00666146
C10090_8270	mmu_circ_0001076	mmu_circ_0001076	0.364287	0.534182	0.337062	-0.232969	0.437568	0.374622	0.299075	0.608714	0.387856	0.440908	0.469279	0.40454	0.0900723	0.932537	0.830466	-9.29255	1.83081e-06	3.19772e-07	-1.32076	0.00803495	0.00166807	-1.32222	0.00803673	0.00462576	NA	NA	NA	-0.0950157	0.934418	0.847188
C10090_1309	mmu_circ_0001077	mmu_circ_0001077	-0.47355	0.476482	0.282166	0.195871	0.900723	0.8815	0.892362	0.150728	0.0567852	0.904313	0.144285	0.109111	-0.565143	0.328895	0.133855	-1.22508	0.0112966	0.0066395	-0.118751	0.872021	0.714664	-0.103686	0.855504	0.811976	-8.61176	0.000899014	9.80974e-05	-0.647545	0.356491	0.169926
C10090_2508	mmu_circ_0001081	mmu_circ_0001081	NA	NA	NA	9.35138	2.50153e-06	6.47328e-07	NA	NA	NA	9.2211	2.51035e-05	7.93702e-06	0.031243	0.978767	0.94339	-9.35138	1.03877e-06	1.70998e-07	-0.691283	0.346307	0.147477	-9.2211	1.14111e-05	2.51832e-06	NA	NA	NA	8.2635	0.00607701	0.00147413
C10090_3824	mmu_circ_0001082	mmu_circ_0001082	0.241655	0.751849	0.57621	2.49634	2.23103e-14	2.33954e-15	-8.43212	0.00310087	0.000653132	3.03691	4.61067e-14	4.70704e-15	0.402274	0.0606615	0.0166116	-0.796181	0.000622863	0.000249758	0.466613	0.0562033	0.0159407	-0.147272	0.591007	0.506434	-0.016992	0.970761	0.930408	-0.473527	0.135569	0.047906
C10090_8873	mmu_circ_0001083	mmu_circ_0001083	0.0226123	0.95289	0.911582	2.70432	1.19239e-43	2.9608e-45	-0.378303	0.548421	0.323956	2.27181	1.85688e-25	9.68276e-27	0.301742	0.011906	0.00280084	-1.14847	9.19055e-16	4.1073e-17	0.327996	0.0323984	0.0086477	-0.635411	7.11218e-05	2.0747e-05	0.0591847	0.879387	0.749992	-0.0651979	0.814099	0.633316
C10090_6243	mmu_circ_0001084	mmu_circ_0001084	-0.495742	0.169207	0.0724914	2.37727	8.78522e-42	2.4158e-43	0.160853	0.631297	0.412082	2.18777	1.80941e-26	8.87784e-28	0.0631799	0.764248	0.527654	-1.09325	2.81513e-16	1.17153e-17	0.465933	0.00074838	4.81414e-05	-0.846811	8.12402e-08	1.09021e-08	-0.352832	0.0950165	0.0335722	0.192625	0.512466	0.288972
C10090_15151	mmu_circ_0001085	mmu_circ_0001085	NA	NA	NA	8.95565	5.75178e-05	2.03608e-05	NA	NA	NA	NA	NA	NA	-0.327751	0.744556	0.504784	-0.584963	0.363847	0.292316	7.94486	0.0116681	0.00283418	8.35843	0.00118373	0.000572918	0.670972	0.426884	0.232094	0.670303	0.479518	0.26135
C10090_5356	mmu_circ_0001089	mmu_circ_0001089	NA	NA	NA	NA	NA	NA	NA	NA	NA	NA	NA	NA	NA	NA	NA	NA	NA	NA	8.2075	0.0049972	0.000860002	NA	NA	NA	NA	NA	NA	NA	NA	NA
C10090_12280	mmu_circ_0001090	mmu_circ_0001090	NA	NA	NA	8.40812	0.00125332	0.00064042	NA	NA	NA	8.70667	0.000605284	0.000277272	0.0269277	0.989086	0.96808	-8.40812	0.000754813	0.000312726	0.439773	0.654312	0.403684	-8.70667	0.000337668	0.000122124	NA	NA	NA	8.2635	0.00592724	0.00147413
C10090_5363	mmu_circ_0001098	mmu_circ_0001098	NA	NA	NA	NA	NA	NA	NA	NA	NA	NA	NA	NA	8.8756	0.000120609	3.3003e-06	8.23362	0.00100268	0.00044214	8.08215	0.0079018	0.00156122	8.49586	0.000648177	0.000272902	0.545115	0.578976	0.367706	-0.232351	0.848679	0.694028
C10090_11341	mmu_circ_0001105	mmu_circ_0001105	-0.0768151	0.883739	0.773774	-0.126051	0.308659	0.253046	0.318715	0.220105	0.090761	-0.585649	0.0132278	0.00867592	0.0977072	0.837832	0.655278	-1.60349	1.17907e-06	1.98929e-07	0.0561943	0.961508	0.895038	-0.973826	0.00747542	0.00428208	-9.49645	2.43991e-06	4.03386e-08	-0.738843	0.245081	0.101164
C10090_4140	mmu_circ_0001107	mmu_circ_0001107	NA	NA	NA	NA	NA	NA	NA	NA	NA	NA	NA	NA	7.94953	0.00609373	0.00132029	NA	NA	NA	7.94486	0.0123476	0.00283418	NA	NA	NA	NA	NA	NA	NA	NA	NA
C10090_6619	mmu_circ_0001110	mmu_circ_0001110	NA	NA	NA	9.66178	1.00489e-07	2.05804e-08	NA	NA	NA	8.59954	0.000978317	0.00050132	-0.641632	0.29186	0.114491	-1.42816	0.00728426	0.00416478	0.345025	0.765369	0.544614	-8.59954	0.000577763	0.000233212	0.8861	0.260083	0.117326	NA	NA	NA
C10090_14101	mmu_circ_0001113	mmu_circ_0001113	-0.592716	0.376382	0.204054	0.989489	0.0194423	0.0130746	-0.359478	0.768387	0.575542	1.11075	0.0223307	0.0150051	-0.529737	0.208051	0.073075	1.92001	6.16872e-20	1.79573e-21	0.551376	0.175554	0.0609012	1.7925	1.89977e-12	1.22436e-13	0.184949	0.404359	0.214786	0.403512	0.0641782	0.0203942
C10090_11135	mmu_circ_0001115	mmu_circ_0001115	NA	NA	NA	9.09987	2.05974e-05	6.45016e-06	NA	NA	NA	9.7065	3.05495e-07	6.9501e-08	0.987324	0.0331948	0.0084597	-9.09987	9.61412e-06	2.09114e-06	-0.624347	0.288888	0.116086	-9.7065	1.04957e-07	1.42405e-08	8.19377	0.00469039	0.00115653	NA	NA	NA
C10090_499	mmu_circ_0001116	mmu_circ_0001116	NA	NA	NA	9.51491	5.09467e-07	1.15422e-07	NA	NA	NA	9.1472	4.28252e-05	1.43504e-05	-1.56538	0.0082797	0.00191733	-9.51491	1.88131e-07	2.61486e-08	-0.524421	0.508046	0.26474	-9.1472	2.01459e-05	4.80906e-06	NA	NA	NA	NA	NA	NA
C10090_15730	mmu_circ_0001119	mmu_circ_0001119	-8.52552	0.00110523	0.000166213	1.46756	0.00536464	0.00323992	NA	NA	NA	9.94354	1.92338e-08	3.59708e-09	-1.11748	0.0186877	0.00453358	-0.326678	0.445108	0.368916	-0.413915	0.466744	0.232592	-0.447685	0.336858	0.263588	-0.402428	0.543028	0.33423	-0.969551	0.150247	0.054368
C10090_6558	mmu_circ_0001123	mmu_circ_0001123	NA	NA	NA	NA	NA	NA	NA	NA	NA	NA	NA	NA	NA	NA	NA	8.61176	0.000145868	4.4526e-05	8.08215	0.00770629	0.00156122	8.73674	0.000184627	6.19208e-05	-8.61176	0.000867107	9.80974e-05	-8.73674	0.000716979	7.0819e-05
C10090_9718	mmu_circ_0001124	mmu_circ_0001124	0.0691893	0.873949	0.761694	0.791707	0.00594437	0.00380108	0.0556409	0.818296	0.644118	0.676278	0.0170849	0.0113411	0.166797	0.618808	0.357612	0.730597	7.64632e-05	2.15376e-05	-0.0595799	0.845029	0.67207	0.735074	8.75899e-05	2.57366e-05	-0.210667	0.357654	0.181192	-0.147413	0.535031	0.305606
C10090_793	mmu_circ_0001125	mmu_circ_0001125	0.0445341	0.918764	0.833698	0.754787	0.00946198	0.00617854	0.052306	0.824551	0.651106	0.652463	0.0220007	0.0147688	0.179061	0.583712	0.324218	0.734349	7.44426e-05	2.09074e-05	-0.0595799	0.845251	0.67207	0.743632	6.90309e-05	2.01078e-05	-0.16444	0.494718	0.290942	-0.182945	0.418985	0.213542
C10090_4807	mmu_circ_0001126	mmu_circ_0001126	NA	NA	NA	NA	NA	NA	NA	NA	NA	NA	NA	NA	8.21286	0.00236819	0.000348676	NA	NA	NA	8.2075	0.00505859	0.000860002	NA	NA	NA	NA	NA	NA	8.2635	0.00587711	0.00147413
C10090_8762	mmu_circ_0001130	mmu_circ_0001130	NA	NA	NA	10.2312	2.71392e-11	3.70916e-12	NA	NA	NA	10.3254	6.84261e-11	9.63536e-12	-0.43356	0.396814	0.176488	-1.41296	0.00109651	0.000491382	-0.345135	0.483399	0.246142	-10.3254	1.18546e-11	8.69554e-13	0.223397	0.820474	0.672618	NA	NA	NA
C10090_7603	mmu_circ_0001136	mmu_circ_0001136	8.43045	0.00180569	0.000354664	9.56567	2.91503e-07	6.49646e-08	-0.304475	0.849637	0.701884	0.577349	0.460967	0.396462	-0.768012	0.210917	0.074297	-0.194768	0.710319	0.640132	-0.524421	0.507436	0.26474	-0.410465	0.522911	0.440434	-0.798774	0.248746	0.110156	-0.0950496	0.931654	0.841388
C10090_8136	mmu_circ_0001138	mmu_circ_0001138	-0.127976	0.763391	0.590162	0.920658	3.41499e-05	1.11357e-05	-1.29599	1.55227e-05	3.62802e-07	0.475397	0.0486248	0.0339678	0.191669	0.382383	0.168039	0.693428	1.22162e-06	2.10866e-07	-0.107437	0.657436	0.407808	1.1875	2.68934e-18	9.86338e-20	-0.263817	0.097605	0.0346712	-0.540541	5.96561e-05	2.37668e-06
C10090_15239	mmu_circ_0001139	mmu_circ_0001139	8.75221	0.000439373	4.83228e-05	NA	NA	NA	8.26538	0.00541198	0.00143958	NA	NA	NA	NA	NA	NA	NA	NA	NA	NA	NA	NA	NA	NA	NA	8.45656	0.00178057	0.000298164	8.40088	0.0033706	0.000765178
C10090_11238	mmu_circ_0001141	mmu_circ_0001141	-0.095332	0.93967	0.88762	2.14049	6.22513e-06	1.76419e-06	9.03122	0.000235197	1.43971e-05	10.2567	2.1146e-10	3.1498e-11	0.15332	0.78598	0.559832	-0.16961	0.637922	0.558672	0.296853	0.600879	0.345744	-0.576497	0.161704	0.115288	-1.41177	0.00185845	0.000314716	0.583086	0.285189	0.122963
C10090_7127	mmu_circ_0001143	mmu_circ_0001143	0.2527	0.636669	0.436656	-0.107397	0.544474	0.483468	-0.116111	0.943014	0.885814	0.151227	0.915915	0.894554	-0.295637	0.66619	0.403224	-9.87759	1.7881e-09	1.74851e-10	0.0772672	0.946558	0.866492	-10.069	8.55498e-10	8.0526e-11	8.57213	0.00116757	0.000151392	NA	NA	NA
C10090_12487	mmu_circ_0001144	mmu_circ_0001144	0.449181	0.413422	0.231658	1.26954	0.00108037	0.000537636	0.177224	0.738403	0.532332	1.35502	0.000136243	5.1979e-05	0.24207	0.561997	0.305156	2.35002	8.17315e-42	8.71266e-44	-0.314319	0.353936	0.154126	1.94188	9.57841e-29	2.05092e-30	-0.66599	1.27824e-05	3.10956e-07	-0.177736	0.289602	0.126231
C10090_5845	mmu_circ_0001145	mmu_circ_0001145	0.730802	0.128378	0.0522514	0.2145	0.88282	0.857638	-0.364667	0.595089	0.373048	-0.174645	0.463513	0.398958	0.536871	0.288999	0.113133	0.466824	0.253817	0.192158	-0.240821	0.664839	0.414622	0.570141	0.0857557	0.0574492	0.31397	0.548849	0.33885	0.104331	0.875739	0.74444
C10090_9025	mmu_circ_0001148	mmu_circ_0001148	NA	NA	NA	NA	NA	NA	NA	NA	NA	NA	NA	NA	NA	NA	NA	NA	NA	NA	8.2075	0.00533379	0.000860002	NA	NA	NA	NA	NA	NA	NA	NA	NA
C10090_14831	mmu_circ_0001150	mmu_circ_0001150	NA	NA	NA	10.8369	4.58231e-17	3.7896e-18	NA	NA	NA	11.3421	7.40277e-22	4.642e-23	0.824281	0.00102024	8.43774e-05	0.0287377	0.933802	0.912362	-0.134328	0.713591	0.470958	-1.05783	0.000277543	9.7908e-05	0.195918	0.64858	0.445918	0.515117	0.236999	0.0967104
C10090_5742	mmu_circ_0001153	mmu_circ_0001153	0.557064	0.444776	0.254464	1.24522	0.0160503	0.0106816	-0.102658	0.962292	0.92213	-0.0858384	0.711916	0.658346	-0.236023	0.733801	0.482058	0.0476208	0.912778	0.886394	0.496265	0.420373	0.201758	0.722265	0.0841886	0.0561674	0.000958465	0.993574	0.988646	0.378962	0.467468	0.251476
C10090_10929	mmu_circ_0001154	mmu_circ_0001154	-8.84737	0.000241668	1.90127e-05	-8.84737	1.20321e-05	3.55802e-06	-8.43212	0.00322883	0.000653132	-8.43212	0.000600341	0.000284122	NA	NA	NA	NA	NA	NA	NA	NA	NA	8.35843	0.0012135	0.000572918	NA	NA	NA	-8.35843	0.0033633	0.000636664
C10090_14426	mmu_circ_0001158	mmu_circ_0001158	NA	NA	NA	9.4625	8.57773e-07	2.0507e-07	NA	NA	NA	10.2211	3.71892e-10	5.69498e-11	1.04787	0.00580008	0.00132181	-9.4625	3.29458e-07	4.88986e-08	-0.59832	0.19576	0.0702414	-10.2211	7.55643e-11	6.0554e-12	NA	NA	NA	NA	NA	NA
C10090_7354	mmu_circ_0001159	mmu_circ_0001159	NA	NA	NA	10.38	1.70162e-12	2.09516e-13	NA	NA	NA	10.3254	6.76858e-11	9.63536e-12	0.0551213	0.939161	0.848256	-1.56177	0.000233447	7.62842e-05	0.297366	0.585791	0.33278	-1.96699	5.82058e-05	1.63746e-05	-8.81826	0.000305906	2.37702e-05	-8.35843	0.00315138	0.000636664
C10090_5820	mmu_circ_0001161	mmu_circ_0001161	NA	NA	NA	8.29278	0.00207431	0.00113783	NA	NA	NA	NA	NA	NA	-0.0799206	0.952538	0.888348	-8.29278	0.00125062	0.000584804	NA	NA	NA	NA	NA	NA	NA	NA	NA	NA	NA	NA
C10090_1166	mmu_circ_0001162	mmu_circ_0001162	-0.018263	0.988186	0.973378	0.621562	0.0279747	0.0191397	0.211811	0.436537	0.232358	0.0689084	0.918733	0.89771	-0.026212	0.951888	0.878412	0.378631	0.0452344	0.0291084	0.533352	0.0304044	0.00808372	1.1456	6.24239e-09	6.89482e-10	-0.225436	0.359129	0.182279	-0.69262	0.000525315	4.3219e-05
C10090_15917	mmu_circ_0001163	mmu_circ_0001163	-0.0542539	0.786541	0.62616	-4.45082	9.43417e-146	4.84002e-148	0.0234359	0.625248	0.406046	-13.6102	3.25946e-125	2.15146e-127	-1.42745	0.015576	0.00373734	-9.51491	1.85397e-07	2.61486e-08	8.52982	0.00136834	0.00014375	NA	NA	NA	NA	NA	NA	NA	NA	NA
C10090_11261	mmu_circ_0001171	mmu_circ_0001171	0.0568043	0.941582	0.891442	-0.496272	0.259894	0.209494	-0.726267	0.275319	0.121113	-9.91782	9.12385e-10	1.43733e-10	-0.664807	0.512886	0.261418	-8.61434	0.000267294	8.94268e-05	8.52982	0.00144596	0.00014375	NA	NA	NA	NA	NA	NA	NA	NA	NA
C10090_12364	mmu_circ_0001172	mmu_circ_0001172	-0.263509	0.385122	0.209926	-1.54174	4.63096e-11	6.45274e-12	-0.166695	0.772274	0.596288	-2.26573	2.03766e-16	1.75297e-17	-0.181769	0.785661	0.560728	-1.44834	0.0011572	0.000520478	0.193087	0.831543	0.651966	-9.59954	3.39274e-07	5.19304e-08	-8.7187	0.000538037	4.82886e-05	NA	NA	NA
C10090_8041	mmu_circ_0001174	mmu_circ_0001174	-0.0953593	0.913025	0.82507	1.51419	7.16131e-06	2.04126e-06	-0.116111	0.942735	0.885814	1.02572	0.00537157	0.00341086	0.0934691	0.834355	0.651366	-0.858881	0.00158308	0.00075584	0.808506	0.00167321	0.000176476	-0.415379	0.188669	0.136672	-0.0397444	0.953064	0.882158	0.390479	0.379278	0.184006
C10090_355	mmu_circ_0001176	mmu_circ_0001176	NA	NA	NA	NA	NA	NA	NA	NA	NA	NA	NA	NA	7.94953	0.00650448	0.00132029	NA	NA	NA	NA	NA	NA	NA	NA	NA	NA	NA	NA	NA	NA	NA
C10090_9521	mmu_circ_0001177	mmu_circ_0001177	-1.04642	0.0601685	0.0217038	0.11844	0.961273	0.954566	-0.351207	0.705288	0.494918	0.392858	0.502294	0.436648	-0.119412	0.886308	0.721788	-0.361718	0.413111	0.33596	-0.0649287	0.911103	0.785132	-10.1471	2.58464e-10	2.2082e-11	-1.36158	0.0288306	0.00867506	9.26327	5.51513e-05	2.0932e-06
C10090_10065	mmu_circ_0001179	mmu_circ_0001179	NA	NA	NA	12.0475	1.43212e-39	4.11444e-41	NA	NA	NA	11.7065	3.78498e-28	1.72385e-29	-0.561686	0.00630015	0.00126723	-1.30314	4.95134e-09	5.17668e-10	-0.188925	0.513046	0.27356	-1.86289	1.55339e-10	1.3041e-11	-0.413076	0.310806	0.148576	0.345723	0.595241	0.36301
C10090_9639	mmu_circ_0001180	mmu_circ_0001180	NA	NA	NA	NA	NA	NA	NA	NA	NA	8.80607	0.000357803	0.000153355	7.94953	0.0063699	0.00132029	NA	NA	NA	-0.183282	0.853723	0.685582	-8.80607	0.000188068	6.3952e-05	NA	NA	NA	NA	NA	NA
C10090_13758	mmu_circ_0001190	mmu_circ_0001190	0.139236	0.873436	0.760312	0.808657	0.148591	0.113525	0.205058	0.76764	0.574342	1.05873	0.027019	0.0183159	0.250358	0.705366	0.448974	-1.11814	0.0190101	0.0115549	-0.241544	0.657193	0.40752	-0.972435	0.0217761	0.0132078	0.240428	0.813261	0.659214	-0.0209765	0.974264	0.932234
C10090_5357	mmu_circ_0001195	mmu_circ_0001195	0.0883227	0.620451	0.420718	0.333242	0.111477	0.083087	-0.132773	0.771906	0.584406	-0.374743	0.000740656	0.00036438	0.0603915	0.785393	0.557008	0.0484774	0.737065	0.669372	0.677999	2.04847e-06	1.36907e-08	0.985172	1.07808e-15	4.54818e-17	-0.628873	8.72678e-06	2.06112e-07	-0.55216	9.64148e-06	2.31832e-07
C10090_12184	mmu_circ_0001196	mmu_circ_0001196	-0.0674607	0.839143	0.689368	0.347314	0.129387	0.0970736	-0.16673	0.695628	0.485236	-0.0515824	0.366053	0.305326	0.0456799	0.868652	0.6918	0.116955	0.409937	0.333042	0.571601	0.000186451	6.26956e-06	0.938634	3.07433e-13	1.77277e-14	-0.451418	0.00227956	0.00039195	-0.633374	1.69008e-06	2.98812e-08
C10090_7986	mmu_circ_0001197	mmu_circ_0001197	-0.0951038	0.922368	0.844126	-0.522588	0.192865	0.150714	0.155262	0.833783	0.662108	-0.889249	0.11672	0.086725	-0.927903	0.26605	0.100835	0.841438	0.0777192	0.0523864	0.986643	0.199436	0.0723934	1.40022	0.0127454	0.00752782	-1.26232	0.028825	0.00865296	-1.09502	0.0813013	0.0265638
C10090_2009	mmu_circ_0001198	mmu_circ_0001198	NA	NA	NA	NA	NA	NA	-0.818981	0.281021	0.124403	-9.56986	8.73122e-08	1.80388e-08	8.43505	0.00107619	9.20818e-05	8.7187	7.49634e-05	2.07156e-05	NA	NA	NA	9.03645	2.70042e-05	6.69238e-06	-8.7187	0.000549607	4.82886e-05	-9.03645	0.000156152	7.87752e-06
C10090_14646	mmu_circ_0001203	mmu_circ_0001203	-0.931827	0.0189488	0.00600866	1.0889	0.000111286	4.12896e-05	-0.269848	0.76889	0.591322	1.57465	7.51302e-07	1.78858e-07	0.49355	0.0124292	0.00293914	0.120693	0.602988	0.522268	0.298886	0.321024	0.13309	0.692982	0.000477122	0.000186014	-0.398771	0.117953	0.0437378	-0.461762	0.0272941	0.00784978
C10090_4872	mmu_circ_0001209	mmu_circ_0001209	8.54574	0.00117993	0.0001825	9.02956	3.44293e-05	1.14599e-05	9.33606	3.41659e-05	1.03619e-06	9.06905	7.22583e-05	2.59462e-05	-0.594518	0.485441	0.23821	-0.211301	0.745121	0.679438	0.197505	0.866698	0.705776	-0.573192	0.385919	0.307704	0.14087	0.902846	0.796654	0.837748	0.289068	0.125794
C10090_11415	mmu_circ_0001210	mmu_circ_0001210	-0.210515	0.856695	0.729692	-0.232851	0.5684	0.508096	-0.373148	0.766157	0.57174	-0.533146	0.312741	0.25673	0.0269277	0.989499	0.96808	-8.40812	0.000757813	0.000312726	-0.160939	0.887449	0.74195	-8.48422	0.00100081	0.000445348	8.19377	0.00467695	0.00115653	NA	NA	NA
C10090_10506	mmu_circ_0001211	mmu_circ_0001211	0.313626	0.366066	0.196698	-10.7986	1.80903e-20	1.25478e-21	-0.327231	0.563813	0.34199	-10.9433	1.45802e-19	1.03296e-20	NA	NA	NA	NA	NA	NA	NA	NA	NA	NA	NA	NA	NA	NA	NA	NA	NA	NA
C10090_8232	mmu_circ_0001213	mmu_circ_0001213	NA	NA	NA	8.29278	0.00214244	0.00113783	-0.304475	0.851645	0.701884	-0.211424	0.663209	0.605716	-8.29278	0.00175956	0.000169237	-8.29278	0.00129314	0.000584804	-8.35843	0.00158191	0.000134799	0.485176	0.490515	0.40618	NA	NA	NA	0.00470291	0.996407	0.977146
C10090_1050	mmu_circ_0001214	mmu_circ_0001214	8.16742	0.00495597	0.00133945	NA	NA	NA	NA	NA	NA	NA	NA	NA	NA	NA	NA	NA	NA	NA	NA	NA	NA	NA	NA	NA	NA	NA	NA	NA	NA	NA
C10090_12868	mmu_circ_0001218	mmu_circ_0001218	-8.74786	0.000414636	3.91668e-05	0.12958	0.977047	0.973438	8.94369	0.000396427	2.77962e-05	8.89905	0.000209967	8.48184e-05	-0.927903	0.266337	0.100835	-8.87744	5.1471e-05	1.36749e-05	-0.106264	0.908981	0.78729	-0.540623	0.44553	0.363546	8.45656	0.00184296	0.000298164	-8.35843	0.00325782	0.000636664
C10090_3139	mmu_circ_0001219	mmu_circ_0001219	0.030427	0.977152	0.952834	-8.40003	0.000240499	9.74236e-05	9.26562	4.99306e-05	2.00056e-06	NA	NA	NA	NA	NA	NA	NA	NA	NA	NA	NA	NA	NA	NA	NA	NA	NA	NA	NA	NA	NA
C10090_11625	mmu_circ_0001220	mmu_circ_0001220	0.00913212	0.945041	0.90028	-12.2625	1.53735e-56	2.77626e-58	-0.0154445	0.862902	0.737572	-12.747	1.40038e-68	2.21842e-70	NA	NA	NA	NA	NA	NA	NA	NA	NA	NA	NA	NA	NA	NA	NA	NA	NA	NA
C10090_6015	mmu_circ_0001221	mmu_circ_0001221	-0.283963	0.346986	0.182918	0.833506	7.27891e-05	2.60356e-05	-0.258821	0.57318	0.351978	0.307806	0.329281	0.271104	-0.382414	0.0316296	0.00800912	-1.70795	1.7941e-17	6.47318e-19	0.339374	0.12699	0.0407918	-2.58953	6.14054e-19	2.1089e-20	-0.600442	0.108984	0.0394854	0.55713	0.373573	0.180534
C10090_2120	mmu_circ_0001228	mmu_circ_0001228	-8.26256	0.00294849	0.000705366	-8.26256	0.000493406	0.000222858	NA	NA	NA	8.70667	0.000612343	0.000277272	8.5345	0.000691728	4.73206e-05	NA	NA	NA	-0.76181	0.412882	0.189022	0.236432	0.724958	0.657334	8.57213	0.00122561	0.000151392	-8.9431	0.000254518	1.63798e-05
C10090_3130	mmu_circ_0001230	mmu_circ_0001230	NA	NA	NA	8.79507	0.000164493	6.42714e-05	NA	NA	NA	8.2211	0.00484254	0.00296306	0.225081	0.826267	0.641846	0.286285	0.636582	0.557368	-0.138955	0.910475	0.786302	-8.2211	0.00306301	0.00162404	-9.08135	6.70647e-05	2.83528e-06	NA	NA	NA
C10090_14384	mmu_circ_0001231	mmu_circ_0001231	-8.94046	0.000148664	9.22932e-06	0.0891029	0.924989	0.908854	-0.347454	0.770645	0.578734	-0.128907	0.688488	0.6335	-0.0797366	0.942765	0.857864	-9.02956	1.68808e-05	3.91048e-06	-0.745767	0.338589	0.14313	-9.06905	3.47105e-05	9.18352e-06	8.67913	0.000743067	7.6869e-05	NA	NA	NA
C10090_8065	mmu_circ_0001234	mmu_circ_0001234	-0.390682	0.364745	0.19511	-10.6955	4.63777e-19	3.43574e-20	0.833222	0.0210508	0.00626136	-9.91782	9.06057e-10	1.43733e-10	NA	NA	NA	NA	NA	NA	NA	NA	NA	NA	NA	NA	NA	NA	NA	NA	NA	NA
C10090_11622	mmu_circ_0001239	mmu_circ_0001239	NA	NA	NA	NA	NA	NA	NA	NA	NA	8.2211	0.00482865	0.00296306	NA	NA	NA	8.23362	0.00101114	0.00044214	-0.138955	0.910255	0.786302	-8.2211	0.00305203	0.00162404	-8.23362	0.00365387	0.000822422	8.40088	0.00354354	0.000765178
C10090_6682	mmu_circ_0001242	mmu_circ_0001242	NA	NA	NA	NA	NA	NA	8.26538	0.0055041	0.00143958	NA	NA	NA	NA	NA	NA	NA	NA	NA	NA	NA	NA	NA	NA	NA	8.45656	0.00179577	0.000298164	NA	NA	NA
C10090_14701	mmu_circ_0001244	mmu_circ_0001244	0.589262	0.188999	0.0831958	-0.339908	0.278329	0.22641	-1.03339	0.0707436	0.023719	-0.307551	0.333779	0.275322	0.834342	0.0579359	0.0157351	-0.496725	0.356634	0.28345	-0.54931	0.35146	0.151947	-0.398845	0.428449	0.347882	0.0477406	0.96939	0.936192	-0.831908	0.254359	0.106133
C10090_9442	mmu_circ_0001245	mmu_circ_0001245	0.567765	0.477233	0.282994	-8.52552	0.000114157	4.25894e-05	NA	NA	NA	8.59954	0.0010011	0.00050132	8.08746	0.00419517	0.000678492	8.49625	0.000277883	9.57038e-05	-8.59954	0.000506623	2.71934e-05	-8.59954	0.000589529	0.000233212	-8.49625	0.00145728	0.000199283	8.40088	0.00363888	0.000765178
C10090_3089	mmu_circ_0001247	mmu_circ_0001247	NA	NA	NA	NA	NA	NA	NA	NA	NA	NA	NA	NA	7.94953	0.00619296	0.00132029	NA	NA	NA	NA	NA	NA	8.62132	0.00034741	0.000129993	NA	NA	NA	-8.62132	0.00124931	0.000147255
C10090_6861	mmu_circ_0001249	mmu_circ_0001249	0.712148	0.0617371	0.0224018	0.351944	0.576172	0.51658	-1.20058	0.00850734	0.00236236	-0.937095	0.00532345	0.00337796	0.0356744	0.9569	0.90629	-1.38116	0.00103129	0.00046131	0.415595	0.515137	0.276612	-0.475678	0.373311	0.296306	0.130267	0.898789	0.806448	0.572409	0.419433	0.215748
C10090_10294	mmu_circ_0001250	mmu_circ_0001250	0.452197	0.256695	0.122474	0.314465	0.610706	0.55431	-1.11018	0.0077702	0.00214902	-1.10012	0.000754011	0.000371282	-0.240277	0.648398	0.386894	-1.54164	0.000113184	3.34586e-05	0.82659	0.0517632	0.0145841	-0.225529	0.67778	0.600188	-0.0397399	0.970919	0.926432	0.642088	0.271895	0.115629
C10090_13279	mmu_circ_0001258	mmu_circ_0001258	-0.00775301	0.996066	0.993934	2.92019	2.4514e-56	4.47722e-58	0.752623	0.00586177	0.00160326	2.83122	1.93988e-50	4.56694e-52	-0.01059	0.958402	0.90967	-1.21233	4.04834e-20	1.16189e-21	0.105915	0.624022	0.37483	-1.62152	3.40808e-28	7.6586e-30	-0.0948202	0.731959	0.53972	0.174515	0.620319	0.38971
C10090_7871	mmu_circ_0001260	mmu_circ_0001260	-8.64097	0.000655476	8.06848e-05	-8.64097	5.38755e-05	1.86182e-05	NA	NA	NA	8.2211	0.00468258	0.00296306	8.32823	0.00149737	0.000179183	NA	NA	NA	0.40168	0.754393	0.53255	-8.2211	0.00297962	0.00162404	NA	NA	NA	NA	NA	NA
C10090_1177	mmu_circ_0001266	mmu_circ_0001266	-0.202168	0.600819	0.399528	-1.07072	9.50345e-06	2.76932e-06	0.299831	0.332275	0.156153	-0.783129	0.00587326	0.00374622	0.342804	0.458307	0.219748	0.0755211	0.846875	0.805382	0.580207	0.164343	0.0563598	0.628085	0.0644362	0.0420468	-0.465982	0.33052	0.162137	-0.180617	0.709168	0.494512
C10090_1021	mmu_circ_0001269	mmu_circ_0001269	0.582925	0.512755	0.315584	0.904603	0.208749	0.16514	8.40301	0.00337508	0.000745636	8.48422	0.00172153	0.000906406	-0.0799696	0.941624	0.85125	-9.16717	5.57747e-06	1.11824e-06	0.138565	0.939943	0.849836	-8.48422	0.00101483	0.000445348	NA	NA	NA	NA	NA	NA
C10090_6676	mmu_circ_0001270	mmu_circ_0001270	0.436309	0.0355105	0.0120206	0.420313	0.134419	0.101373	-0.285878	0.354439	0.170612	-0.255922	0.0405955	0.0280998	-0.088239	0.79178	0.567844	0.543971	0.000536334	0.000213632	0.118064	0.743936	0.514758	0.682266	1.53201e-05	3.60186e-06	0.251632	0.153832	0.0604574	0.318525	0.0495562	0.0152804
C10090_4940	mmu_circ_0001271	mmu_circ_0001271	0.61375	0.00217706	0.000436344	0.621199	0.00789024	0.00510364	-0.100038	0.914309	0.821708	0.00557646	0.631205	0.570654	-0.126631	0.660552	0.396844	0.417444	0.00674084	0.00382644	-0.0660277	0.78543	0.57152	0.71091	2.40235e-06	4.492e-07	0.3214	0.0469566	0.0149831	0.235966	0.178227	0.0675178
C10090_13945	mmu_circ_0001272	mmu_circ_0001272	0.118986	0.860477	0.74765	0.210667	0.880369	0.853812	0.691356	0.222906	0.0923502	0.312343	0.718404	0.665452	0.258996	0.697358	0.439462	0.0706677	0.877282	0.842752	0.485397	0.453307	0.22334	0.613615	0.166417	0.119035	0.432329	0.398417	0.210312	-0.00743801	0.981453	0.944666
C10090_5250	mmu_circ_0001273	mmu_circ_0001273	8.75221	0.000451456	4.83228e-05	NA	NA	NA	NA	NA	NA	NA	NA	NA	8.6279	0.000456262	2.43178e-05	8.37069	0.000525078	0.000205704	NA	NA	NA	8.62132	0.000343903	0.000129993	-8.37069	0.00222608	0.000404838	-0.0950157	0.93272	0.847188
C10090_10152	mmu_circ_0001274	mmu_circ_0001274	0.0158858	0.977392	0.951238	0.167647	0.954113	0.943344	0.733677	0.205408	0.0831004	0.341286	0.688367	0.632328	0.335152	0.575794	0.317116	0.113687	0.803962	0.75254	0.586061	0.333654	0.140068	0.67766	0.128043	0.0887372	0.46552	0.347929	0.174458	0.0749551	0.93786	0.870428
C10090_8059	mmu_circ_0001276	mmu_circ_0001276	-0.482446	0.577194	0.378412	-9.02818	2.55469e-06	6.79958e-07	8.40301	0.00319026	0.000745636	8.48422	0.00164785	0.000906406	8.21286	0.00226755	0.000348676	8.49625	0.000270948	9.57038e-05	-8.48422	0.00080301	6.05444e-05	-8.48422	0.0009712	0.000445348	0.28248	0.798139	0.629048	9.1114	0.000159205	7.76884e-06
C10090_1090	mmu_circ_0001277	mmu_circ_0001277	-0.42776	0.4538	0.263148	0.65688	0.116817	0.087307	-0.105254	0.95764	0.91554	0.93766	0.0270955	0.0183737	0.497408	0.111874	0.0336514	0.376312	0.183966	0.134034	0.0955485	0.909764	0.783788	0.464748	0.124205	0.0857614	-0.102031	0.814858	0.662048	-0.188079	0.66032	0.43243
C10090_8281	mmu_circ_0001278	mmu_circ_0001278	-0.350396	0.532401	0.334656	0.623715	0.128555	0.0963966	0.354213	0.510884	0.29169	0.819882	0.066391	0.047226	-0.145909	0.785962	0.561264	-0.24751	0.435832	0.360692	-0.371636	0.417534	0.195861	0.489462	0.118145	0.0811008	0.0460207	0.957449	0.888704	0.12741	0.838544	0.662612
C10090_11102	mmu_circ_0001283	mmu_circ_0001283	-0.202121	0.855339	0.730826	1.31729	0.00900869	0.005877	0.833334	0.11282	0.0401178	1.31234	0.0042228	0.00249094	0.177313	0.790625	0.566854	0.461059	0.182349	0.132593	-0.156026	0.769184	0.548132	0.228356	0.522888	0.440636	-0.332557	0.478246	0.273122	-0.186098	0.710105	0.496002
C10090_7716	mmu_circ_0001286	mmu_circ_0001286	0.361649	0.314799	0.161317	-0.413626	0.0869666	0.0635518	0.155117	0.759786	0.557472	0.110639	0.985194	0.983026	0.967489	0.00159623	0.000152876	0.104354	0.791373	0.737674	-0.0133224	0.971077	0.912464	0.329753	0.402665	0.323532	0.498736	0.208299	0.0874718	0.00942154	0.994249	0.981124
C10090_7517	mmu_circ_0001287	mmu_circ_0001287	NA	NA	NA	NA	NA	NA	NA	NA	NA	NA	NA	NA	NA	NA	NA	8.61176	0.000145283	4.4526e-05	NA	NA	NA	8.35843	0.00118063	0.000572918	-8.61176	0.000849375	9.80974e-05	-0.0949275	0.93229	0.859544
C10090_14450	mmu_circ_0001288	mmu_circ_0001288	0.320048	0.702658	0.511246	-0.139666	0.6409	0.58724	-0.297843	0.770382	0.589254	-9.6339	4.04425e-08	8.0618e-09	0.00757141	0.996217	0.993776	1.15803	0.0131641	0.00779378	9.26655	2.32975e-05	3.69802e-07	9.94325	2.03615e-09	2.07198e-10	-0.470413	0.426875	0.232392	-0.194551	0.767966	0.579324
C10090_5259	mmu_circ_0001289	mmu_circ_0001289	-0.665452	0.10853	0.042808	-0.989587	0.0013768	0.000719336	0.479709	0.339258	0.160189	0.513174	0.34095	0.281912	0.310076	0.650996	0.38871	-9.56567	1.04937e-07	1.3983e-08	-0.166795	0.778794	0.5623	-10.1471	2.55923e-10	2.2082e-11	NA	NA	NA	NA	NA	NA
C10090_529	mmu_circ_0001294	mmu_circ_0001294	9.01542	0.000118862	6.58398e-06	NA	NA	NA	NA	NA	NA	NA	NA	NA	NA	NA	NA	NA	NA	NA	NA	NA	NA	NA	NA	NA	NA	NA	NA	NA	NA	NA
C10090_2067	mmu_circ_0001295	mmu_circ_0001295	-0.131737	0.855504	0.70899	0.574354	0.159814	0.122919	-0.325478	0.608105	0.386284	0.291222	0.546479	0.482272	-0.0798616	0.874028	0.74088	-1.11804	0.000742848	0.000313708	-0.60898	0.0582367	0.0165782	-0.702379	0.0247096	0.0150866	0.825316	0.0452714	0.0143278	0.0494687	0.968763	0.920576
C10090_3862	mmu_circ_0001297	mmu_circ_0001297	0.167888	0.887492	0.78371	-8.26256	0.000488743	0.000222858	-0.65229	0.550096	0.327088	0.625361	0.341403	0.282362	NA	NA	NA	NA	NA	NA	-0.527896	0.419756	0.198569	-9.54303	6.14683e-07	9.91676e-08	8.33136	0.0029148	0.000587228	NA	NA	NA
C10090_13104	mmu_circ_0001298	mmu_circ_0001298	0.319873	0.572676	0.372538	0.819608	0.056822	0.0403806	-0.892599	0.0590972	0.019288	-0.211218	0.381264	0.319272	-0.186784	0.744451	0.500456	-0.959654	0.00786864	0.00451342	0.155271	0.82809	0.647356	-0.896848	0.0285583	0.0176302	0.403921	0.50258	0.297346	0.0977341	0.934316	0.855906
C10090_10361	mmu_circ_0001299	mmu_circ_0001299	0.329303	0.466302	0.273642	0.541495	0.210921	0.167118	-0.468413	0.354492	0.170736	0.12687	0.935079	0.91862	-0.0146849	0.980716	0.949474	-0.609075	0.0582876	0.0382968	-0.133029	0.754246	0.529138	-1.28502	0.000195496	6.826e-05	0.335879	0.502538	0.297084	0.618795	0.240708	0.0989614
C10090_14681	mmu_circ_0001300	mmu_circ_0001300	NA	NA	NA	8.02956	0.00567889	0.0035917	NA	NA	NA	NA	NA	NA	-8.02956	0.00373511	0.000716208	-8.02956	0.00374608	0.00204506	NA	NA	NA	NA	NA	NA	NA	NA	NA	NA	NA	NA
C10090_6006	mmu_circ_0001301	mmu_circ_0001301	NA	NA	NA	NA	NA	NA	NA	NA	NA	NA	NA	NA	NA	NA	NA	NA	NA	NA	7.94486	0.0118827	0.00283418	NA	NA	NA	NA	NA	NA	NA	NA	NA
C10090_12933	mmu_circ_0001302	mmu_circ_0001302	0.288076	0.658464	0.460766	0.828414	0.0767628	0.0555912	-0.944247	0.0723731	0.024366	-0.381101	0.218223	0.171026	-0.535495	0.252349	0.0939416	-1.05917	0.0077509	0.00443794	-0.14716	0.821841	0.631142	-0.775343	0.105515	0.0717826	0.338752	0.648148	0.442406	-0.182522	0.851698	0.692682
C10090_7838	mmu_circ_0001305	mmu_circ_0001305	-0.832112	0.248821	0.117852	0.44514	0.523795	0.461774	-0.889203	0.115829	0.0414456	-0.168265	0.51296	0.447274	0.0493524	0.95368	0.893892	-1.33702	0.00961658	0.00558306	0.159761	0.847813	0.67694	-0.490698	0.283525	0.216626	0.823084	0.283428	0.131137	-0.969551	0.150149	0.054368
C10090_15007	mmu_circ_0001306	mmu_circ_0001306	NA	NA	NA	8.7077	0.000270121	0.00011419	NA	NA	NA	NA	NA	NA	-8.7077	0.000237304	9.4495e-06	-8.7077	0.00015079	4.78212e-05	NA	NA	NA	NA	NA	NA	NA	NA	NA	NA	NA	NA
C10090_14703	mmu_circ_0001307	mmu_circ_0001307	-0.716828	0.32837	0.169941	-0.747653	0.104743	0.0774666	-0.0291122	0.987078	0.96648	-8.43212	0.000587504	0.000284122	-0.30205	0.80858	0.596404	1.04044	0.0446985	0.0287086	8.62278	0.000947847	7.91852e-05	10.1237	1.29682e-10	1.06671e-11	-0.224215	0.772329	0.589006	0.209981	0.76718	0.564624
C10090_4523	mmu_circ_0001308	mmu_circ_0001308	8.75221	0.000458331	4.83228e-05	9.91707	3.82307e-09	6.54308e-10	0.373831	0.663882	0.45127	1.02969	0.0960786	0.070056	-0.382382	0.532788	0.28081	-1.54639	0.00181372	0.000871536	0.152505	0.881588	0.734104	-1.10369	0.0468324	0.0298846	-0.0393226	0.968473	0.94011	-8.49586	0.00201686	0.00030619
C10090_13006	mmu_circ_0001309	mmu_circ_0001309	NA	NA	NA	NA	NA	NA	NA	NA	NA	NA	NA	NA	8.32823	0.00154211	0.000179183	NA	NA	NA	8.2075	0.00504001	0.000860002	NA	NA	NA	NA	NA	NA	NA	NA	NA
C10090_6907	mmu_circ_0001310	mmu_circ_0001310	-0.191805	0.500281	0.304426	-0.493922	0.0010864	0.000541084	-0.70359	0.00119453	0.000141922	-0.748114	1.92546e-06	4.98204e-07	-0.445971	0.0928422	0.0271872	-1.19472	4.8091e-06	9.24752e-07	-0.361614	0.130328	0.04249	-1.27003	5.66408e-07	9.02986e-08	-0.0728428	0.902017	0.800822	-0.0639001	0.907779	0.788796
C10090_16072	mmu_circ_0001311	mmu_circ_0001311	NA	NA	NA	8.87744	9.78788e-05	3.61748e-05	8.26538	0.00528483	0.00143958	9.35865	8.24128e-06	2.42796e-06	0.33518	0.720338	0.464388	0.619017	0.226944	0.169673	0.122139	0.922131	0.815242	0.631878	0.161677	0.115336	-0.101134	0.90082	0.801036	-0.656927	0.239118	0.0981388
C10090_9326	mmu_circ_0001314	mmu_circ_0001314	NA	NA	NA	8.51491	0.000757439	0.000360456	NA	NA	NA	8.35843	0.00290501	0.00163882	-0.427448	0.720283	0.465382	-0.281292	0.723336	0.65379	-8.35843	0.00156275	0.000134799	0.678017	0.300346	0.231388	0.638286	0.489529	0.282456	-0.188138	0.851693	0.693682
C10090_2430	mmu_circ_0001319	mmu_circ_0001319	NA	NA	NA	NA	NA	NA	NA	NA	NA	NA	NA	NA	NA	NA	NA	NA	NA	NA	8.08215	0.00829645	0.00156122	NA	NA	NA	NA	NA	NA	NA	NA	NA
C10090_2024	mmu_circ_0001327	mmu_circ_0001327	NA	NA	NA	8.29278	0.00212194	0.00113783	NA	NA	NA	NA	NA	NA	-8.29278	0.00168789	0.000169237	-8.29278	0.00127923	0.000584804	NA	NA	NA	NA	NA	NA	NA	NA	NA	NA	NA	NA
C10090_7567	mmu_circ_0001329	mmu_circ_0001329	9.16742	3.97244e-05	1.74333e-06	NA	NA	NA	8.52865	0.00214532	0.000386206	NA	NA	NA	8.43505	0.000995418	9.20818e-05	8.61176	0.000145186	4.4526e-05	NA	NA	NA	9.03645	2.63505e-05	6.69238e-06	0.166972	0.898359	0.77466	-0.188138	0.850954	0.693682
C10090_12746	mmu_circ_0001330	mmu_circ_0001330	0.127324	0.910327	0.817272	-8.52552	0.000112548	4.25894e-05	8.40301	0.00341813	0.000745636	NA	NA	NA	NA	NA	NA	NA	NA	NA	9.08215	9.2112e-05	2.21238e-06	NA	NA	NA	NA	NA	NA	NA	NA	NA
C10090_7992	mmu_circ_0001331	mmu_circ_0001331	NA	NA	NA	8.02956	0.00562777	0.0035917	NA	NA	NA	8.80607	0.000348326	0.000153355	1.18305	0.0885296	0.0257074	1.27422	0.0299492	0.0186399	0.517214	0.542661	0.296378	1.27462	0.00604224	0.0034227	0.994282	0.0286684	0.00858562	0.25303	0.703757	0.484434
C10090_14909	mmu_circ_0001332	mmu_circ_0001332	NA	NA	NA	NA	NA	NA	NA	NA	NA	8.2211	0.00471043	0.00296306	NA	NA	NA	NA	NA	NA	-8.2211	0.00219387	0.000300122	-8.2211	0.00299125	0.00162404	NA	NA	NA	NA	NA	NA
C10090_7037	mmu_circ_0001334	mmu_circ_0001334	NA	NA	NA	NA	NA	NA	NA	NA	NA	NA	NA	NA	NA	NA	NA	NA	NA	NA	NA	NA	NA	8.49586	0.000641394	0.000272902	NA	NA	NA	-8.49586	0.0019444	0.00030619
C10090_10479	mmu_circ_0001335	mmu_circ_0001335	NA	NA	NA	9.02956	3.4729e-05	1.14599e-05	-9.11035	0.000143666	8.19464e-06	-0.403684	0.401077	0.33904	-0.153968	0.876362	0.737848	-0.211301	0.745792	0.679438	0.00344895	0.981077	0.959152	0.236432	0.72445	0.657334	-0.486898	0.605704	0.39541	-0.194237	0.847982	0.694458
C10090_1265	mmu_circ_0001336	mmu_circ_0001336	NA	NA	NA	NA	NA	NA	NA	NA	NA	NA	NA	NA	NA	NA	NA	NA	NA	NA	NA	NA	NA	8.35843	0.00122449	0.000572918	NA	NA	NA	-8.35843	0.00343604	0.000636664
C10090_15053	mmu_circ_0001339	mmu_circ_0001339	NA	NA	NA	8.51491	0.000738336	0.000360456	NA	NA	NA	NA	NA	NA	0.112987	0.935108	0.83963	1.04044	0.04467	0.0287086	9.14644	5.55726e-05	1.2187e-06	10.4958	1.16831e-13	6.41494e-15	0.0167757	0.987046	0.97912	-0.384489	0.421253	0.217578
C10090_7893	mmu_circ_0001340	mmu_circ_0001340	8.16742	0.00464766	0.00133945	8.29278	0.00205129	0.00113783	NA	NA	NA	NA	NA	NA	-0.343247	0.801079	0.582038	-8.29278	0.0012376	0.000584804	7.94486	0.0115392	0.00283418	8.35843	0.00117703	0.000572918	8.33136	0.00277182	0.000587228	-0.0949275	0.931813	0.859544
C10090_280	mmu_circ_0001341	mmu_circ_0001341	-0.914722	0.0954186	0.0369214	0.474852	0.372732	0.313376	-0.602685	0.452736	0.24287	0.35265	0.588296	0.524742	-0.139985	0.826049	0.633074	-0.767023	0.0439778	0.0282096	0.190742	0.809557	0.607168	-0.702307	0.127467	0.0882836	-1.36158	0.0288533	0.00867506	-9.28425	3.022e-05	8.76252e-07
C10090_523	mmu_circ_0001344	mmu_circ_0001344	-0.738909	0.242655	0.113958	2.26278	3.27129e-14	3.44382e-15	0.418129	0.357705	0.17308	2.21014	2.75188e-15	2.5551e-16	0.296304	0.194592	0.0669964	0.587844	0.000675681	0.00027163	0.0722315	0.883198	0.736736	1.06319	1.0381e-12	6.3822e-14	-0.179548	0.426754	0.231318	-0.57029	0.000143911	8.10812e-06
C10090_10170	mmu_circ_0001345	mmu_circ_0001345	NA	NA	NA	NA	NA	NA	NA	NA	NA	NA	NA	NA	NA	NA	NA	NA	NA	NA	NA	NA	NA	8.62132	0.000348793	0.000129993	NA	NA	NA	-8.62132	0.00127221	0.000147255
C10090_9505	mmu_circ_0001349	mmu_circ_0001349	0.352188	0.725261	0.537784	-0.370462	0.478862	0.417248	8.8505	0.000582697	5.36652e-05	8.2211	0.00490784	0.00296306	-8.02956	0.00399461	0.000716208	-8.02956	0.00386509	0.00204506	-8.2211	0.00239099	0.000300122	-8.2211	0.00310146	0.00162404	NA	NA	NA	NA	NA	NA
C10090_203	mmu_circ_0001350	mmu_circ_0001350	-0.448834	0.0809157	0.0306384	-0.336968	0.0228102	0.0154096	-0.856763	0.00123625	0.000148254	-0.000828599	0.642996	0.58287	0.30796	0.258812	0.0968232	1.50675	3.00387e-20	8.5596e-22	-0.328852	0.138438	0.0458568	1.15256	2.89126e-14	1.47107e-15	-0.0451507	0.833178	0.68933	-0.0252935	0.870202	0.7344
C10090_11438	mmu_circ_0001351	mmu_circ_0001351	9.30492	1.32693e-05	4.61604e-07	11.0999	1.76515e-20	1.21347e-21	NA	NA	NA	11.3586	4.18241e-22	2.56742e-23	-0.0798624	0.884473	0.717404	-0.281597	0.31551	0.246108	-0.181239	0.602431	0.348524	-0.132425	0.641158	0.564768	0.393302	0.255699	0.114141	-0.0753451	0.842928	0.701844
C10090_2509	mmu_circ_0001352	mmu_circ_0001352	-8.94046	0.000146144	9.22932e-06	2.73294	8.55109e-16	8.14222e-17	0.0812	0.893057	0.77776	2.78882	3.76348e-17	3.04722e-18	0.173542	0.583159	0.323792	-0.238352	0.291742	0.225236	-0.126647	0.656985	0.407254	0.0560096	0.815231	0.759062	0.109147	0.792552	0.617532	0.11548	0.769727	0.578112
C10090_2757	mmu_circ_0001353	mmu_circ_0001353	-0.210515	0.856964	0.729692	-0.232851	0.568531	0.508096	-8.69523	0.00118319	0.000151767	-0.474125	0.413606	0.35136	-8.40812	0.00107143	8.22666e-05	-8.40812	0.000759322	0.000312726	-8.2211	0.00234418	0.000300122	-8.2211	0.00307284	0.00162404	NA	NA	NA	8.40088	0.00358661	0.000765178
C10090_4997	mmu_circ_0001355	mmu_circ_0001355	-8.26256	0.00302983	0.000705366	0.532501	0.570637	0.511032	NA	NA	NA	8.48422	0.00167942	0.000906406	-0.582204	0.538584	0.286614	-8.79507	8.85324e-05	2.55724e-05	0.530918	0.593555	0.339794	-8.48422	0.000989965	0.000445348	NA	NA	NA	NA	NA	NA
C10090_15251	mmu_circ_0001356	mmu_circ_0001356	1.44082	0.013068	0.00401098	2.5325	2.81758e-08	5.35416e-09	-0.067171	0.994194	0.987002	1.70941	0.000147728	5.7921e-05	-0.236549	0.613405	0.351734	-1.18312	0.000532174	0.000203902	0.124968	0.858508	0.694086	-0.890338	0.014565	0.00866118	0.0146747	0.989882	0.982868	0.11157	0.92101	0.81028
C10090_433	mmu_circ_0001363	mmu_circ_0001363	-0.355268	0.240517	0.112632	-1.1325	6.82904e-07	1.59059e-07	0.543713	0.149135	0.0559776	0.744312	0.0497008	0.0347632	-0.0523298	0.940262	0.849442	0.632758	0.0266868	0.016511	-0.126651	0.773776	0.554798	0.737132	0.00264819	0.00136255	0.338772	0.307193	0.145906	-0.235436	0.45049	0.23767
C10090_2209	mmu_circ_0001365	mmu_circ_0001365	0.145711	0.900826	0.80127	-8.40003	0.000241478	9.74236e-05	-0.166879	0.915652	0.821386	-9.35843	8.45738e-07	2.02084e-07	NA	NA	NA	NA	NA	NA	NA	NA	NA	NA	NA	NA	NA	NA	NA	NA	NA	NA
C10090_12386	mmu_circ_0001367	mmu_circ_0001367	0.799847	0.00245147	0.000495936	1.50402	1.06672e-10	1.54109e-11	-0.0571112	0.99427	0.982374	0.5066	0.0700985	0.0500946	0.269138	0.164783	0.0544116	0.479462	0.00152661	0.00072763	1.15871	7.67824e-13	2.2451e-15	0.912868	7.80749e-08	1.04442e-08	-0.492862	0.00295351	0.000629208	-0.171084	0.381818	0.187309
C10090_4693	mmu_circ_0001368	mmu_circ_0001368	NA	NA	NA	NA	NA	NA	NA	NA	NA	8.2211	0.00478916	0.00296306	NA	NA	NA	NA	NA	NA	-8.2211	0.00228093	0.000300122	0.400216	0.602459	0.518802	NA	NA	NA	-8.62132	0.00121292	0.000147255
C10090_14114	mmu_circ_0001370	mmu_circ_0001370	NA	NA	NA	NA	NA	NA	NA	NA	NA	NA	NA	NA	NA	NA	NA	NA	NA	NA	8.08215	0.00778656	0.00156122	NA	NA	NA	NA	NA	NA	NA	NA	NA
C10090_3735	mmu_circ_0001371	mmu_circ_0001371	0.502754	0.205229	0.0924822	1.42799	1.7012e-06	4.33592e-07	1.08486	0.00574591	0.00156997	1.56641	3.36746e-05	1.09211e-05	-0.142846	0.708259	0.452262	-1.53729	2.06107e-08	2.42528e-09	0.608981	0.0184509	0.00465898	-0.823257	0.00715083	0.00409312	0.0405164	0.968518	0.919566	-0.0190169	0.963826	0.91384
C10090_5564	mmu_circ_0001378	mmu_circ_0001378	-0.699219	0.149143	0.0626186	0.709002	0.0620676	0.044465	-0.794819	0.161992	0.0622456	0.655557	0.0945805	0.068818	-0.119965	0.820565	0.616136	0.203786	0.477634	0.398028	-0.20827	0.622904	0.373118	0.737527	0.00310556	0.00160973	0.53872	0.0440289	0.0139137	-0.223281	0.486635	0.267638
C10090_15574	mmu_circ_0001385	mmu_circ_0001385	-0.510351	0.510642	0.31319	-1.233	0.0179307	0.0120212	-8.69523	0.00115807	0.000151767	-8.69523	0.000145473	5.67488e-05	0.183298	0.901912	0.778698	-8.02956	0.00372509	0.00204506	NA	NA	NA	8.49586	0.000640437	0.000272902	NA	NA	NA	-8.49586	0.00192423	0.00030619
C10090_778	mmu_circ_0001387	mmu_circ_0001387	NA	NA	NA	8.40812	0.00127326	0.00064042	NA	NA	NA	8.89905	0.000213337	8.48184e-05	-0.0798913	0.952974	0.884084	0.410145	0.533636	0.454214	-8.89905	9.74979e-05	2.46392e-06	0.892108	0.0727667	0.0478838	-0.486898	0.605923	0.39541	-0.679766	0.265785	0.112216
C10090_6456	mmu_circ_0001390	mmu_circ_0001390	0.428482	0.555602	0.356376	0.574451	0.402073	0.34085	-0.462257	0.559473	0.336244	-0.265728	0.418708	0.356524	-0.0798661	0.933498	0.833038	0.440884	0.303823	0.236182	-0.332989	0.629121	0.380258	0.343706	0.45729	0.374402	-0.0396171	0.962815	0.898688	-0.0476721	0.932439	0.86122
C10090_11870	mmu_circ_0001391	mmu_circ_0001391	8.65284	0.000710401	9.3909e-05	8.29278	0.00210662	0.00113783	NA	NA	NA	8.80607	0.000355431	0.000153355	0.919836	0.199556	0.0691538	-0.0591621	0.952122	0.937288	0.904224	0.136979	0.0451732	0.400216	0.511834	0.428608	-8.23362	0.00363859	0.000822422	-0.0169514	0.978125	0.94031
C10090_2003	mmu_circ_0001394	mmu_circ_0001394	NA	NA	NA	NA	NA	NA	NA	NA	NA	NA	NA	NA	NA	NA	NA	NA	NA	NA	7.94486	0.0128504	0.00283418	NA	NA	NA	NA	NA	NA	NA	NA	NA
C10090_7509	mmu_circ_0001395	mmu_circ_0001395	-0.0457297	0.934462	0.871948	-1.26686	4.18607e-07	9.4236e-08	-0.620464	0.125627	0.0455108	-0.305892	0.160919	0.12261	1.00348	0.00141531	0.00013497	0.539335	0.102723	0.0708824	-0.228236	0.601107	0.346126	1.08744	6.73635e-06	1.40382e-06	0.276837	0.515022	0.309086	-0.60588	0.011042	0.00295442
C10090_28	mmu_circ_0001396	mmu_circ_0001396	0.611017	0.283366	0.139598	1.66877	2.64105e-05	8.5253e-06	0.369375	0.529227	0.307906	0.676322	0.193045	0.150146	-0.396698	0.305194	0.121342	0.429141	0.0976763	0.0670198	0.420971	0.406084	0.184553	1.6142	4.65798e-09	5.01644e-10	-0.392364	0.223932	0.0959406	-0.631745	0.0126201	0.00340046
C10090_4419	mmu_circ_0001397	mmu_circ_0001397	0.419268	0.409154	0.2285	1.55952	2.86713e-06	7.66058e-07	-0.0673202	0.995859	0.986438	1.26675	0.000289263	0.000119333	-0.509881	0.0785801	0.0224652	0.41129	0.0617762	0.0408802	-0.352387	0.282895	0.112555	1.21807	1.96639e-09	1.98015e-10	-0.160555	0.610406	0.400786	-0.603276	0.00225064	0.000364496
C10090_13584	mmu_circ_0001398	mmu_circ_0001398	NA	NA	NA	9.02956	3.43235e-05	1.14599e-05	NA	NA	NA	9.2211	2.48271e-05	7.93702e-06	-0.401665	0.670792	0.408338	0.788859	0.0845836	0.0573254	-9.2211	8.57324e-06	1.00272e-07	0.400216	0.442433	0.360268	-0.776763	0.168145	0.0674724	0.0205518	0.997686	0.995334
C10090_2577	mmu_circ_0001399	mmu_circ_0001399	0.660118	0.00032411	2.94882e-05	0.301107	0.376096	0.316436	0.125724	0.390162	0.195841	-0.487314	0.000604639	0.000270724	0.175179	0.472591	0.229878	-0.116103	0.541575	0.462304	-0.000328939	0.967658	0.902986	0.338384	0.0580383	0.0375766	-0.324799	0.161791	0.0642732	-0.155971	0.502338	0.280182
C10090_4471	mmu_circ_0001402	mmu_circ_0001402	NA	NA	NA	8.7077	0.000272903	0.00011419	NA	NA	NA	NA	NA	NA	-0.379478	0.734107	0.483908	1.8185	1.12986e-05	2.52238e-06	8.2075	0.00509615	0.000860002	11.3762	3.18424e-25	7.76314e-27	-0.610028	0.147533	0.0572848	-0.880225	0.00318442	0.00057878
C10090_3529	mmu_circ_0001403	mmu_circ_0001403	NA	NA	NA	NA	NA	NA	NA	NA	NA	NA	NA	NA	9.21262	9.98706e-06	1.18287e-07	10.1594	3.35105e-12	2.19144e-13	7.94486	0.0125649	0.00283418	10.2842	7.73259e-12	5.49166e-13	-0.532745	0.295203	0.138468	0.0494687	0.968523	0.920576
C10090_10321	mmu_circ_0001404	mmu_circ_0001404	0.295996	0.176328	0.0764388	-1.6719	1.55707e-13	1.77339e-14	-0.62419	0.00306626	0.000569912	-2.78064	4.13769e-34	1.4202e-35	-0.816803	0.0669631	0.0186518	-1.82874	0.000116222	3.44282e-05	0.0173634	0.993172	0.98529	-1.23199	0.0157859	0.00943074	-0.176916	0.897731	0.774966	-8.62132	0.00126962	0.000147255
C10090_1300	mmu_circ_0001405	mmu_circ_0001405	-0.298719	0.418878	0.235948	-0.436481	0.0276198	0.0188628	-0.382461	0.39616	0.201056	-1.02363	0.000131896	5.02338e-05	-1.03677	0.00314837	0.000488618	0.0901471	0.78468	0.7287	-0.0793855	0.885359	0.742792	0.101531	0.807719	0.749156	-0.215572	0.621141	0.413996	0.364511	0.462325	0.24653
C10090_9241	mmu_circ_0001406	mmu_circ_0001406	-0.234169	0.484916	0.290794	-0.89353	2.67644e-05	8.65052e-06	-0.878933	0.000195843	1.16067e-05	-1.75011	5.60539e-17	4.60024e-18	0.30588	0.446871	0.210888	0.226965	0.461157	0.383352	0.262502	0.602417	0.348642	0.618713	0.0270683	0.0166186	0.409319	0.21443	0.0908568	0.138508	0.777771	0.592404
C10090_169	mmu_circ_0001407	mmu_circ_0001407	NA	NA	NA	NA	NA	NA	NA	NA	NA	8.48422	0.00172948	0.000906406	8.32823	0.00161298	0.000179183	NA	NA	NA	-8.48422	0.000935118	6.05444e-05	-8.48422	0.00101828	0.000445348	NA	NA	NA	8.2635	0.00623454	0.00147413
C10090_14959	mmu_circ_0001408	mmu_circ_0001408	-0.0949704	0.932656	0.86602	0.410921	0.621641	0.566276	-0.466136	0.668349	0.456352	-0.510812	0.312735	0.256518	-0.331234	0.697393	0.438772	0.367494	0.433276	0.3568	0.778103	0.29552	0.119862	0.896314	0.107958	0.073582	0.612378	0.19427	0.0808464	0.0304486	0.992141	0.977406
C10090_5574	mmu_circ_0001410	mmu_circ_0001410	-0.811472	0.0541631	0.0193636	-0.0841092	0.517222	0.455236	-0.0199741	0.958089	0.91437	-0.0186137	0.789384	0.747006	-0.504279	0.268677	0.10194	-0.220661	0.55733	0.47701	0.606209	0.179469	0.0625968	0.918497	0.00641164	0.00364826	0.619285	0.107902	0.0389662	0.14606	0.80615	0.625042
C10090_14496	mmu_circ_0001411	mmu_circ_0001411	0.489663	0.307212	0.155785	-9.74803	4.90322e-10	7.5767e-11	-0.719356	0.358742	0.17428	-9.56986	8.63922e-08	1.80388e-08	NA	NA	NA	NA	NA	NA	NA	NA	NA	NA	NA	NA	NA	NA	NA	NA	NA	NA
C10090_14934	mmu_circ_0001413	mmu_circ_0001413	0.612722	2.03541e-13	1.74293e-15	-3.70332	5.32081e-131	3.38488e-133	0.516575	4.19297e-10	2.44998e-12	-4.60059	1.6542e-133	1.05549e-135	-0.379363	0.462061	0.222208	-0.474129	0.211854	0.157088	0.522017	0.408007	0.185938	-0.298833	0.608972	0.527122	-1.36186	0.0138968	0.0039419	-0.0951278	0.921598	0.82014
C10090_6040	mmu_circ_0001414	mmu_circ_0001414	-0.60972	0.41805	0.235034	-0.306915	0.397841	0.336528	0.0741809	0.873268	0.75032	0.13664	0.949248	0.938388	0.426974	0.587837	0.32879	1.71066	9.7921e-06	2.17e-06	-0.996378	0.0694906	0.0203334	1.35217	5.57659e-05	1.56173e-05	0.205438	0.656205	0.45488	-0.593714	0.0840634	0.0276446
C10090_13187	mmu_circ_0001415	mmu_circ_0001415	NA	NA	NA	NA	NA	NA	NA	NA	NA	NA	NA	NA	8.21286	0.00235188	0.000348676	NA	NA	NA	NA	NA	NA	NA	NA	NA	NA	NA	NA	NA	NA	NA
C10090_7626	mmu_circ_0001419	mmu_circ_0001419	NA	NA	NA	8.87744	9.79877e-05	3.61748e-05	NA	NA	NA	NA	NA	NA	-8.87744	8.96263e-05	2.23288e-06	-8.87744	5.07659e-05	1.36749e-05	NA	NA	NA	NA	NA	NA	NA	NA	NA	NA	NA	NA
C10090_1634	mmu_circ_0001421	mmu_circ_0001421	8.43045	0.00187731	0.000354664	NA	NA	NA	-0.292216	0.847899	0.703044	-0.0956873	0.770824	0.724524	8.5345	0.000693799	4.73206e-05	8.23362	0.00102023	0.00044214	-0.276261	0.799746	0.592794	-0.103686	0.906225	0.872988	-8.23362	0.0037362	0.000822422	-0.0949756	0.936698	0.85323
C10090_12081	mmu_circ_0001422	mmu_circ_0001422	0.281865	0.345325	0.181302	0.30758	0.478707	0.416818	-0.524275	0.145976	0.0546698	0.186092	0.729379	0.678828	0.398228	0.0881033	0.0255656	-2.43361	5.4868e-14	2.8795e-15	-0.0887617	0.783881	0.569574	-1.81045	7.7744e-10	7.16952e-11	0.43435	0.550333	0.340936	-0.201736	0.76654	0.579874
C10090_8720	mmu_circ_0001427	mmu_circ_0001427	NA	NA	NA	9.91707	3.83226e-09	6.54308e-10	NA	NA	NA	8.89905	0.000213455	8.48184e-05	-0.244825	0.729412	0.478132	-1.54639	0.00181449	0.000871536	0.247387	0.828697	0.644888	-8.89905	0.000108198	3.34892e-05	-0.0393226	0.969653	0.94011	9.40088	2.0448e-05	5.63984e-07
C10090_11850	mmu_circ_0001431	mmu_circ_0001431	-0.510337	0.41317	0.231406	1.31712	0.000208271	8.3257e-05	0.57027	0.149551	0.0562586	1.38972	2.18488e-05	6.83104e-06	0.457435	0.0915753	0.0267414	0.238634	0.362808	0.291258	-0.0837253	0.812523	0.617368	0.183965	0.468644	0.386182	0.486853	0.0555517	0.0181849	0.316239	0.289875	0.126692
C10090_4546	mmu_circ_0001432	mmu_circ_0001432	NA	NA	NA	8.79507	0.000163377	6.42714e-05	-8.56986	0.00211898	0.00031484	0.41684	0.649043	0.589494	-0.707603	0.439014	0.205746	-8.79507	8.87213e-05	2.55724e-05	-0.556661	0.507148	0.266708	-8.9867	6.10497e-05	1.75371e-05	NA	NA	NA	NA	NA	NA
C10090_6755	mmu_circ_0001434	mmu_circ_0001434	-0.918401	0.159307	0.0675682	-0.112756	0.604413	0.54711	-0.925639	0.209992	0.085364	-0.278455	0.454054	0.389318	0.446281	0.486302	0.238136	1.05195	0.00527034	0.00295606	-0.14496	0.860326	0.696634	1.32992	0.000622061	0.00025373	-0.887632	0.0380189	0.0118349	-0.725744	0.0756489	0.0246278
C10090_2907	mmu_circ_0001439	mmu_circ_0001439	NA	NA	NA	12.3223	6.16596e-48	1.34125e-49	9.19155	8.41301e-05	3.8624e-06	12.7	2.42593e-56	4.8572e-58	-0.310851	0.129974	0.0402636	-12.3223	7.36357e-52	5.58532e-54	-0.309101	0.0600137	0.0171718	-3.49377	1.84708e-40	2.7019e-42	8.57213	0.00121862	0.000151392	-0.457418	0.592036	0.35966
C10090_11742	mmu_circ_0001445	mmu_circ_0001445	8.54574	0.00114238	0.0001825	8.40812	0.00125635	0.00064042	9.33606	3.29565e-05	1.03619e-06	8.59954	0.000991514	0.00050132	0.12638	0.931661	0.826262	-8.40812	0.000755935	0.000312726	-0.276261	0.798845	0.592794	-8.59954	0.000584828	0.000233212	8.33136	0.00292165	0.000587228	NA	NA	NA
C10090_11543	mmu_circ_0001457	mmu_circ_0001457	NA	NA	NA	NA	NA	NA	NA	NA	NA	NA	NA	NA	NA	NA	NA	NA	NA	NA	8.2075	0.00519255	0.000860002	8.9431	5.12546e-05	1.40497e-05	NA	NA	NA	-8.9431	0.000250842	1.63798e-05
C10090_316	mmu_circ_0001458	mmu_circ_0001458	NA	NA	NA	NA	NA	NA	NA	NA	NA	NA	NA	NA	NA	NA	NA	NA	NA	NA	NA	NA	NA	8.49586	0.000666293	0.000272902	NA	NA	NA	-8.49586	0.00215043	0.00030619
C10090_9681	mmu_circ_0001460	mmu_circ_0001460	NA	NA	NA	12.2545	1.01136e-45	2.366e-47	NA	NA	NA	12.543	1.71555e-50	4.00106e-52	0.339028	0.0551942	0.0149341	1.21918	6.81992e-21	1.84549e-22	0.028105	0.976515	0.946942	0.498942	0.000575597	0.00023368	0.636468	1.9326e-09	1.41499e-11	-0.100572	0.594794	0.363018
C10090_13494	mmu_circ_0001465	mmu_circ_0001465	NA	NA	NA	NA	NA	NA	NA	NA	NA	NA	NA	NA	8.6279	0.000452792	2.43178e-05	8.81826	3.7581e-05	9.63792e-06	NA	NA	NA	NA	NA	NA	-8.81826	0.000312556	2.37702e-05	NA	NA	NA
C10090_6839	mmu_circ_0001468	mmu_circ_0001468	NA	NA	NA	NA	NA	NA	NA	NA	NA	8.70667	0.000596404	0.000277272	NA	NA	NA	9.23338	1.2244e-06	2.1009e-07	-0.383389	0.707358	0.463594	0.417194	0.50735	0.424208	-0.554252	0.472277	0.268598	0.0654677	0.970446	0.924692
C10090_13828	mmu_circ_0001469	mmu_circ_0001469	NA	NA	NA	8.51491	0.000744912	0.000360456	NA	NA	NA	NA	NA	NA	-8.51491	0.000635815	3.999e-05	-0.281292	0.722844	0.65379	NA	NA	NA	NA	NA	NA	0.445509	0.671269	0.47103	8.40088	0.00343844	0.000765178
C10090_10864	mmu_circ_0001471	mmu_circ_0001471	NA	NA	NA	8.7077	0.00027547	0.00011419	NA	NA	NA	NA	NA	NA	-0.494843	0.634696	0.372108	-8.7077	0.000153772	4.78212e-05	8.08215	0.00825978	0.00156122	NA	NA	NA	NA	NA	NA	NA	NA	NA
C10090_3619	mmu_circ_0001472	mmu_circ_0001472	NA	NA	NA	8.51491	0.000750001	0.000360456	NA	NA	NA	NA	NA	NA	-0.427448	0.720055	0.465382	-8.51491	0.00045119	0.000167231	NA	NA	NA	NA	NA	NA	NA	NA	NA	NA	NA	NA
C10090_8902	mmu_circ_0001474	mmu_circ_0001474	0.226958	0.786656	0.632356	-8.94046	5.58139e-06	1.55541e-06	-0.960393	0.141759	0.052775	-9.81089	4.1665e-09	7.19626e-10	NA	NA	NA	NA	NA	NA	NA	NA	NA	8.62132	0.000352604	0.000129993	NA	NA	NA	-8.62132	0.00131784	0.000147255
C10090_14102	mmu_circ_0001484	mmu_circ_0001484	0.549684	0.0645321	0.0235714	0.0300925	0.737946	0.690244	-0.482179	0.315404	0.146294	-1.11168	0.000343883	0.00014633	0.215613	0.633372	0.370814	-0.483036	0.128131	0.0902538	1.02611	0.0048804	0.000868442	0.184463	0.690771	0.616232	0.410118	0.345169	0.172748	-0.405379	0.501214	0.27861
C10090_14978	mmu_circ_0001485	mmu_circ_0001485	NA	NA	NA	NA	NA	NA	NA	NA	NA	NA	NA	NA	8.21286	0.00229807	0.000348676	11.3038	6.28025e-27	1.13297e-28	NA	NA	NA	11.7778	1.73819e-33	3.2796e-35	-2.43188	8.80987e-11	5.20186e-13	-0.814026	0.00150614	0.000208772
C10090_11209	mmu_circ_0001487	mmu_circ_0001487	0.605276	0.344961	0.181019	2.9169	4.16524e-19	3.06004e-20	-0.287021	0.770732	0.590594	1.83145	1.53218e-08	2.80816e-09	-0.152764	0.637066	0.37688	-0.391334	0.0597708	0.0393816	-0.15558	0.623828	0.374844	-0.69138	0.00550862	0.0030959	-0.594274	0.032333	0.009874	0.661788	0.0224865	0.0062869
C10090_5897	mmu_circ_0001488	mmu_circ_0001488	0.23285	0.591163	0.390576	-10.4952	1.30652e-16	1.12608e-17	0.24831	0.511915	0.293418	-2.01851	3.11493e-06	8.34074e-07	NA	NA	NA	NA	NA	NA	-8.48422	0.000830621	6.05444e-05	-8.48422	0.000983937	0.000445348	NA	NA	NA	NA	NA	NA
C10090_10561	mmu_circ_0001491	mmu_circ_0001491	9.60028	8.64341e-07	1.66531e-08	NA	NA	NA	-0.304475	0.850496	0.701884	0.236211	0.864013	0.832076	NA	NA	NA	NA	NA	NA	-8.80607	0.000171673	5.48578e-06	-8.80607	0.0001876	6.3952e-05	NA	NA	NA	NA	NA	NA
C10090_13063	mmu_circ_0001493	mmu_circ_0001493	NA	NA	NA	NA	NA	NA	NA	NA	NA	NA	NA	NA	NA	NA	NA	NA	NA	NA	8.32328	0.0031416	0.000473734	NA	NA	NA	NA	NA	NA	NA	NA	NA
C10090_11345	mmu_circ_0001496	mmu_circ_0001496	-0.0696932	0.915107	0.827196	-0.232931	0.22459	0.178824	-0.370205	0.593411	0.371006	-0.173818	0.470917	0.40647	-0.980318	0.00938511	0.00218098	0.373733	0.21585	0.160715	-0.0381894	0.938734	0.847174	0.0217783	0.959445	0.943986	0.340556	0.335786	0.165593	1.00189	0.00280573	0.000506646
C10090_10444	mmu_circ_0001501	mmu_circ_0001501	NA	NA	NA	10.7951	1.38462e-16	1.19624e-17	NA	NA	NA	10.6271	2.34611e-13	2.58098e-14	0.652896	0.0122784	0.00290098	-0.796193	0.0125122	0.00738472	0.28109	0.561774	0.311158	-0.68383	0.0565124	0.0365288	-0.269082	0.655717	0.453922	0.0856256	0.936451	0.85168
C10090_11208	mmu_circ_0001505	mmu_circ_0001505	NA	NA	NA	8.61434	0.000463065	0.000202882	NA	NA	NA	9.4227	4.82095e-06	1.34287e-06	0.713884	0.317337	0.127596	-0.0025792	0.995214	0.994194	-0.892875	0.160315	0.0545434	-9.4227	1.97204e-06	3.61632e-07	-8.61176	0.000885596	9.80974e-05	NA	NA	NA
C10090_5390	mmu_circ_0001507	mmu_circ_0001507	-0.119671	0.738393	0.562538	-1.24511	3.19749e-09	5.41336e-10	0.241551	0.235135	0.099118	-1.59519	8.18015e-11	1.17168e-11	0.146011	0.795517	0.572636	0.179118	0.58682	0.505738	0.432182	0.348229	0.149677	1.00847	0.000587857	0.000238782	-0.282992	0.508899	0.30433	-0.236342	0.524327	0.297514
C10090_13689	mmu_circ_0001508	mmu_circ_0001508	NA	NA	NA	12.2468	1.78126e-45	4.20366e-47	8.52865	0.00226431	0.000386206	12.1659	8.87714e-39	2.7149e-40	0.168919	0.487831	0.241176	-1.47735	3.71533e-12	2.4449e-13	0.122144	0.735267	0.504306	-1.3747	1.68237e-09	1.67631e-10	0.0565676	0.928383	0.847254	-0.0169514	0.958032	0.903378
C10090_7564	mmu_circ_0001509	mmu_circ_0001509	8.43045	0.00181063	0.000354664	NA	NA	NA	8.52865	0.00214864	0.000386206	NA	NA	NA	NA	NA	NA	NA	NA	NA	NA	NA	NA	NA	NA	NA	NA	NA	NA	NA	NA	NA
C10090_4936	mmu_circ_0001512	mmu_circ_0001512	NA	NA	NA	9.79507	1.97809e-08	3.6696e-09	NA	NA	NA	8.89905	0.000209739	8.48184e-05	0.0420893	0.957271	0.907228	-9.79507	5.74696e-09	6.11454e-10	0.308692	0.770956	0.550522	-0.162315	0.828395	0.775358	8.57213	0.00120036	0.000151392	-0.335861	0.760341	0.554214
C10090_13912	mmu_circ_0001513	mmu_circ_0001513	-0.265145	0.619423	0.418032	-1.08106	0.00112421	0.000560836	-0.29219	0.715139	0.509392	-0.171652	0.48755	0.422114	0.134448	0.874111	0.740058	0.418126	0.362147	0.29043	-0.356609	0.506356	0.267772	0.0570056	0.897638	0.863384	0.272152	0.663037	0.462278	0.0611127	0.956035	0.896536
C10090_10298	mmu_circ_0001514	mmu_circ_0001514	8.84549	0.000291294	2.48656e-05	NA	NA	NA	-8.56986	0.00204988	0.00031484	-8.56986	0.000305192	0.000126979	7.94953	0.00625891	0.00132029	NA	NA	NA	NA	NA	NA	NA	NA	NA	NA	NA	NA	NA	NA	NA
C10090_3090	mmu_circ_0001515	mmu_circ_0001515	8.30469	0.00313345	0.000689242	8.02956	0.00582054	0.0035917	-8.43212	0.0032024	0.000653132	-8.43212	0.000599227	0.000284122	-8.02956	0.00390565	0.000716208	-8.02956	0.00382068	0.00204506	NA	NA	NA	NA	NA	NA	NA	NA	NA	NA	NA	NA
C10090_8561	mmu_circ_0001516	mmu_circ_0001516	NA	NA	NA	8.02956	0.00591896	0.0035917	8.40301	0.00344007	0.000745636	8.80607	0.000359649	0.000153355	0.920263	0.261692	0.098435	1.1298	0.0633339	0.0420408	-0.376032	0.701213	0.456052	0.815253	0.122359	0.0842788	0.0344049	0.970703	0.95282	-1.22044	0.0509819	0.0157681
C10090_9964	mmu_circ_0001518	mmu_circ_0001518	-0.232607	0.863581	0.725852	-8.40003	0.000241724	9.74236e-05	8.26538	0.00567931	0.00143958	NA	NA	NA	NA	NA	NA	NA	NA	NA	8.2075	0.00527909	0.000860002	NA	NA	NA	9.04166	0.000108703	5.10908e-06	NA	NA	NA
C10090_7562	mmu_circ_0001521	mmu_circ_0001521	0.473063	0.31912	0.163701	-0.447253	0.179172	0.139094	0.0646276	0.882026	0.762754	-0.275252	0.446995	0.382478	0.320868	0.67146	0.407922	0.145073	0.781564	0.723884	0.0713831	0.970376	0.912818	1.07002	0.00699382	0.0039988	0.0192455	0.985224	0.975218	-0.786803	0.0753635	0.0244816
C10090_14178	mmu_circ_0001528	mmu_circ_0001528	NA	NA	NA	NA	NA	NA	NA	NA	NA	NA	NA	NA	NA	NA	NA	NA	NA	NA	NA	NA	NA	8.9431	5.07444e-05	1.40497e-05	8.57213	0.0011783	0.000151392	0.24623	0.83118	0.65405
C10090_7217	mmu_circ_0001529	mmu_circ_0001529	NA	NA	NA	NA	NA	NA	NA	NA	NA	8.2211	0.00469401	0.00296306	NA	NA	NA	8.23362	0.000995734	0.00044214	-8.2211	0.00217725	0.000300122	0.274751	0.725465	0.6621	-8.23362	0.00352086	0.000822422	-8.49586	0.0019357	0.00030619
C10090_5159	mmu_circ_0001533	mmu_circ_0001533	NA	NA	NA	8.40812	0.00124831	0.00064042	NA	NA	NA	NA	NA	NA	-0.458582	0.70974	0.454222	0.673233	0.263951	0.200696	8.2075	0.00501546	0.000860002	9.12386	1.3808e-05	3.18782e-06	-0.887579	0.257582	0.115407	0.341091	0.70595	0.489272
C10090_8776	mmu_circ_0001537	mmu_circ_0001537	0.168044	0.84902	0.732016	-0.233029	0.540806	0.478768	-0.389021	0.764362	0.56721	-0.111604	0.735399	0.684916	-0.526879	0.622161	0.360566	-8.61434	0.000271452	8.94268e-05	-8.80607	0.000172802	5.48578e-06	-8.80607	0.000188656	6.3952e-05	NA	NA	NA	NA	NA	NA
C10090_13234	mmu_circ_0001539	mmu_circ_0001539	-0.12496	0.75601	0.581826	-0.0147926	0.51819	0.456194	-0.25654	0.536231	0.314368	-0.301045	0.0548902	0.0386224	0.462299	0.0321636	0.00816404	0.13914	0.559082	0.478624	-0.0445951	0.881196	0.733042	0.239369	0.279303	0.213104	-0.121379	0.717348	0.523864	-0.607781	0.00954043	0.00253242
C10090_12056	mmu_circ_0001544	mmu_circ_0001544	-8.64097	0.000649826	8.06848e-05	-0.474052	0.359624	0.300068	-0.373148	0.765586	0.57174	-0.658934	0.233152	0.184572	0.920281	0.227216	0.0824048	1.38844	0.0103203	0.006017	0.0716029	0.97682	0.949686	0.84785	0.171928	0.123379	-0.361584	0.609199	0.399706	-0.177547	0.853455	0.691496
C10090_8702	mmu_circ_0001549	mmu_circ_0001549	0.310121	3.34997e-05	1.36258e-06	-1.9817	8.90175e-107	7.307e-109	-0.268338	0.0181842	0.00533788	-1.81081	3.04857e-88	3.08546e-90	-0.0333053	0.913701	0.793914	-0.597633	0.000214748	6.99098e-05	-0.355627	0.0137394	0.00343484	-0.746501	2.23086e-06	4.16188e-07	-1.21474	5.77852e-07	8.32522e-09	-0.785257	0.000466526	3.37632e-05
C10090_11784	mmu_circ_0001551	mmu_circ_0001551	-0.416918	0.666642	0.47077	5.09627	1.03041e-124	6.97796e-127	9.26562	4.92467e-05	2.00056e-06	13.6406	1.25233e-108	9.0928e-111	-0.233717	0.024608	0.00608038	-0.652802	1.55186e-10	1.28208e-11	0.269847	0.0207771	0.0052854	-0.394842	0.00065569	0.000267864	0.228391	0.102385	0.036635	0.250179	0.105837	0.0358778
C10090_862	mmu_circ_0001557	mmu_circ_0001557	8.75221	0.000453724	4.83228e-05	8.7077	0.000276703	0.00011419	NA	NA	NA	8.35843	0.00290841	0.00163882	0.504914	0.536592	0.283582	0.110558	0.86313	0.825618	-0.0351514	0.969119	0.907992	0.765431	0.229879	0.170277	-8.81826	0.000326763	2.37702e-05	-0.0124662	0.983323	0.948784
C10090_8264	mmu_circ_0001558	mmu_circ_0001558	NA	NA	NA	8.51491	0.000764361	0.000360456	NA	NA	NA	9.06905	7.33367e-05	2.59462e-05	-0.186685	0.883892	0.736246	1.48396	0.00153177	0.0007304	-0.745767	0.338924	0.14313	0.490904	0.356559	0.28044	-0.879153	0.0871957	0.0303764	-0.91826	0.162205	0.0597274
C10090_926	mmu_circ_0001561	mmu_circ_0001561	0.736646	0.00983905	0.00294882	1.23165	4.96293e-06	1.37288e-06	0.177953	0.54817	0.32396	0.888294	0.000527575	0.000234826	0.0404375	0.925459	0.815848	-0.163209	0.451137	0.374468	-0.067788	0.809422	0.607912	0.220247	0.268964	0.203904	0.912334	3.26909e-06	6.33126e-08	0.102719	0.782545	0.598254
C10090_6495	mmu_circ_0001567	mmu_circ_0001567	NA	NA	NA	NA	NA	NA	NA	NA	NA	NA	NA	NA	NA	NA	NA	NA	NA	NA	NA	NA	NA	9.28425	3.64125e-06	7.2331e-07	8.45656	0.00180605	0.000298164	-9.28425	2.79478e-05	8.76252e-07
C10090_884	mmu_circ_0001569	mmu_circ_0001569	-0.202104	0.731937	0.551352	-10.3329	7.07209e-15	7.05322e-16	-0.124895	0.930784	0.85542	-10.1978	8.92839e-12	1.14527e-12	NA	NA	NA	NA	NA	NA	NA	NA	NA	NA	NA	NA	NA	NA	NA	NA	NA	NA
C10090_15125	mmu_circ_0001570	mmu_circ_0001570	-0.609775	0.0157886	0.00493474	0.2145	0.706229	0.65507	-0.119427	0.901491	0.78962	0.544843	0.0276659	0.018797	-0.0419014	0.913684	0.797258	0.314851	0.0828687	0.0560782	0.0606383	0.910857	0.791768	-0.0995107	0.641437	0.565422	0.348399	0.0664014	0.0222854	0.197599	0.511248	0.288044
C10090_6150	mmu_circ_0001571	mmu_circ_0001571	NA	NA	NA	NA	NA	NA	NA	NA	NA	NA	NA	NA	NA	NA	NA	NA	NA	NA	NA	NA	NA	NA	NA	NA	8.95913	0.000176778	1.00622e-05	NA	NA	NA
C10090_13539	mmu_circ_0001572	mmu_circ_0001572	-1.09533	0.0989244	0.0385956	-9.40003	5.51046e-08	1.08558e-08	0.592119	0.392243	0.19754	-8.81089	7.20434e-05	2.53618e-05	NA	NA	NA	NA	NA	NA	NA	NA	NA	NA	NA	NA	NA	NA	NA	NA	NA	NA
C10090_2679	mmu_circ_0001575	mmu_circ_0001575	0.967087	0.00338253	0.000863508	-1.61993	0.000199341	7.95646e-05	-0.374857	0.431295	0.228008	-11.1765	5.54774e-23	3.28348e-24	-8.40812	0.00107716	8.22666e-05	-8.40812	0.000760457	0.000312726	NA	NA	NA	NA	NA	NA	NA	NA	NA	NA	NA	NA
C10090_10168	mmu_circ_0001576	mmu_circ_0001576	0.904882	0.0190992	0.00606144	-9.6954	1.0759e-09	1.73318e-10	-0.139806	0.89451	0.781016	-10.8383	3.42104e-18	2.5893e-19	NA	NA	NA	NA	NA	NA	NA	NA	NA	NA	NA	NA	NA	NA	NA	NA	NA	NA
C10090_3239	mmu_circ_0001577	mmu_circ_0001577	0.904882	0.0190831	0.00606144	-9.6954	1.0718e-09	1.73318e-10	-0.166708	0.844997	0.709572	-10.8383	3.41112e-18	2.5893e-19	NA	NA	NA	NA	NA	NA	NA	NA	NA	NA	NA	NA	NA	NA	NA	NA	NA	NA
C10090_7821	mmu_circ_0001578	mmu_circ_0001578	0.877866	0.0246485	0.00802708	-9.6954	1.06504e-09	1.73318e-10	-0.0265795	0.951694	0.902176	-10.7251	7.78356e-17	6.49058e-18	NA	NA	NA	NA	NA	NA	NA	NA	NA	NA	NA	NA	NA	NA	NA	NA	NA	NA
C10090_12923	mmu_circ_0001579	mmu_circ_0001579	0.931311	0.0146565	0.00455344	-9.6954	1.06909e-09	1.73318e-10	-0.139806	0.894795	0.781016	-10.8383	3.40126e-18	2.5893e-19	NA	NA	NA	NA	NA	NA	NA	NA	NA	NA	NA	NA	NA	NA	NA	NA	NA	NA
C10090_10558	mmu_circ_0001580	mmu_circ_0001580	NA	NA	NA	11.8776	3.64857e-35	1.28033e-36	8.26538	0.00552762	0.00143958	12.1376	5.13598e-38	1.60464e-39	0.32766	0.128014	0.0395256	-2.01182	2.95594e-14	1.50282e-15	-0.113917	0.660799	0.41086	-1.85332	8.24344e-14	4.40396e-15	-0.0398205	0.961926	0.90172	0.149027	0.849946	0.679636
C10090_8134	mmu_circ_0001591	mmu_circ_0001591	0.207355	0.481308	0.287342	-0.170225	0.196153	0.154371	-0.34732	0.357733	0.172795	-0.0507942	0.515512	0.45052	0.198448	0.585421	0.326124	-0.0653643	0.813937	0.763212	-0.509366	0.0299274	0.00794438	-0.673372	0.00424776	0.00234856	-0.135274	0.740432	0.55069	-0.117327	0.784864	0.600582
C10090_12814	mmu_circ_0001592	mmu_circ_0001592	-0.243309	0.396191	0.218716	-1.50307	5.54198e-12	7.16488e-13	-0.240731	0.609681	0.38949	-1.64561	1.47691e-10	2.14794e-11	0.105701	0.879055	0.707624	-1.07625	0.00525547	0.00294664	0.780925	0.0275799	0.00724634	0.0976267	0.823632	0.769852	0.0915392	0.928205	0.846872	-0.679978	0.175678	0.0660966
C10090_9888	mmu_circ_0001596	mmu_circ_0001596	-0.59773	0.476831	0.283266	-9.02818	2.58458e-06	6.79958e-07	-8.43212	0.00330149	0.000653132	-8.43212	0.000604274	0.000284122	NA	NA	NA	NA	NA	NA	NA	NA	NA	NA	NA	NA	NA	NA	NA	NA	NA	NA
C10090_1024	mmu_circ_0001599	mmu_circ_0001599	NA	NA	NA	9.16717	1.21089e-05	3.63044e-06	NA	NA	NA	8.59954	0.00100242	0.00050132	0.746021	0.157018	0.0509818	-0.448463	0.448233	0.37169	1.06757	0.0781531	0.0232272	-8.59954	0.000589845	0.000233212	-8.7187	0.000557095	4.82886e-05	8.5263	0.00241037	0.000397182
C10090_14753	mmu_circ_0001600	mmu_circ_0001600	0.904769	0.142948	0.0592906	2.52607	2.00797e-10	2.96684e-11	-0.266491	0.846029	0.703612	2.12971	7.39228e-08	1.51586e-08	0.030605	0.952814	0.889968	-0.731997	0.00785047	0.00449978	-0.149263	0.704241	0.460522	-0.410338	0.160263	0.113886	-0.00867553	0.975871	0.962042	-0.369107	0.395491	0.195974
C10090_5841	mmu_circ_0001601	mmu_circ_0001601	-0.0337893	0.95318	0.912114	-0.313565	0.0544465	0.0386142	-0.0954444	0.941764	0.883854	-0.492613	0.0214999	0.0143947	0.0771037	0.886071	0.721414	-1.02969	0.000458412	0.000166243	0.596028	0.0326616	0.00873842	-1.02718	0.00203014	0.00103638	0.108414	0.88427	0.75541	0.368906	0.54937	0.319106
C10090_1666	mmu_circ_0001605	mmu_circ_0001605	-0.588181	0.237947	0.111237	-0.3934	0.157645	0.121153	0.155117	0.760074	0.557472	-0.626419	0.109587	0.0807738	0.0420893	0.957477	0.907228	-0.491285	0.287716	0.221538	0.285461	0.752146	0.526722	0.499762	0.303406	0.234196	-0.847221	0.233546	0.101163	0.194537	0.818408	0.639176
C10090_8591	mmu_circ_0001606	mmu_circ_0001606	-8.84737	0.000260258	1.90127e-05	-8.84737	1.2074e-05	3.55802e-06	NA	NA	NA	8.2211	0.0049475	0.00296306	NA	NA	NA	9.08135	5.03675e-06	9.70592e-07	-8.2211	0.00242324	0.000300122	1.45908	0.00847228	0.00488364	-0.209445	0.817718	0.667462	-0.490853	0.466138	0.249662
C10090_1419	mmu_circ_0001610	mmu_circ_0001610	-0.49257	0.0613342	0.0222392	-0.59555	0.000994778	0.000493204	-0.921582	0.00386933	0.00091081	-0.141665	0.344277	0.28542	-0.0798624	0.884696	0.717404	2.53262	7.2339e-64	3.26252e-66	-0.456974	0.116718	0.0371508	2.48265	1.51439e-62	1.38051e-64	-0.10615	0.473256	0.268484	-0.431986	0.000257414	1.72338e-05
C10090_4321	mmu_circ_0001611	mmu_circ_0001611	0.258329	0.737644	0.561178	2.64139	5.09517e-16	4.70516e-17	0.24825	0.742606	0.537842	1.92618	3.35098e-06	8.99492e-07	-0.466024	0.0524909	0.0141276	-1.14015	2.45767e-06	4.47398e-07	0.420704	0.204615	0.0745298	-0.621838	0.0493972	0.031605	0.282281	0.508589	0.303664	0.0120118	0.998679	0.987614
C10090_13518	mmu_circ_0001612	mmu_circ_0001612	NA	NA	NA	9.4625	8.62214e-07	2.0507e-07	NA	NA	NA	9.4227	4.77569e-06	1.34287e-06	-0.747227	0.249634	0.092778	0.403231	0.362066	0.290514	-1.34055	0.0304729	0.00811466	0.823095	0.0472411	0.0301554	0.813395	0.0361998	0.0112088	0.502906	0.263263	0.110655
C10090_15260	mmu_circ_0001614	mmu_circ_0001614	0.582925	0.511865	0.315584	-0.233001	0.613422	0.558412	8.40301	0.00324433	0.000745636	NA	NA	NA	0.298663	0.82309	0.635848	1.46689	0.00875319	0.0050513	9.32328	1.43433e-05	2.03706e-07	8.73674	0.000184162	6.19208e-05	-1.16509	0.0674166	0.0226898	-8.73674	0.000713573	7.0819e-05
C10090_7593	mmu_circ_0001615	mmu_circ_0001615	-0.329653	0.27518	0.134166	-0.337646	0.0342184	0.0236502	-0.425795	0.316007	0.146837	-0.231191	0.217323	0.170224	0.053381	0.91468	0.800182	0.595393	0.0048643	0.00271236	0.240202	0.573171	0.320942	0.944555	2.57599e-05	6.30754e-06	0.138089	0.661792	0.459378	-0.106448	0.715228	0.50329
C10090_12914	mmu_circ_0001619	mmu_circ_0001619	NA	NA	NA	8.02956	0.00574036	0.0035917	NA	NA	NA	8.48422	0.00168285	0.000906406	0.0578995	0.974624	0.935814	0.689141	0.32006	0.250182	0.386454	0.738796	0.508578	1.68144	0.000536971	0.00021003	0.240428	0.813498	0.659214	-1.63936	0.00191937	0.000268766
C10090_1962	mmu_circ_0001620	mmu_circ_0001620	NA	NA	NA	NA	NA	NA	NA	NA	NA	NA	NA	NA	NA	NA	NA	8.37069	0.00053402	0.000205704	8.08215	0.00836141	0.00156122	NA	NA	NA	-8.37069	0.00230698	0.000404838	8.40088	0.00361457	0.000765178
C10090_14545	mmu_circ_0001621	mmu_circ_0001621	NA	NA	NA	NA	NA	NA	NA	NA	NA	NA	NA	NA	NA	NA	NA	NA	NA	NA	NA	NA	NA	8.73674	0.000184744	6.19208e-05	NA	NA	NA	0.204601	0.870149	0.736816
C10090_14223	mmu_circ_0001623	mmu_circ_0001623	-8.40003	0.00197465	0.000342406	-8.40003	0.000238685	9.74236e-05	8.52865	0.00222084	0.000386206	NA	NA	NA	NA	NA	NA	NA	NA	NA	NA	NA	NA	NA	NA	NA	NA	NA	NA	NA	NA	NA
C10090_7339	mmu_circ_0001624	mmu_circ_0001624	-8.26256	0.00285276	0.000705366	0.145553	0.99192	0.990292	NA	NA	NA	NA	NA	NA	-8.40812	0.00100464	8.22666e-05	-0.03743	0.971108	0.96195	8.62278	0.000945483	7.91852e-05	8.73674	0.00018393	6.19208e-05	0.0858724	0.960175	0.899172	0.11157	0.938437	0.8703
C10090_13838	mmu_circ_0001625	mmu_circ_0001625	-0.665918	0.0116127	0.00353012	-0.681723	0.000457479	0.000203908	-0.681291	0.0426223	0.0133299	-0.403874	0.0482085	0.0336346	0.120061	0.814993	0.604796	-0.390868	0.190363	0.139318	0.294765	0.443684	0.217672	0.0739764	0.817813	0.76268	0.36793	0.361782	0.18448	0.0483911	0.954743	0.8951
C10090_3575	mmu_circ_0001627	mmu_circ_0001627	0.303359	0.646013	0.447386	0.2145	0.88338	0.857638	-0.237018	0.850524	0.697884	-0.281529	0.461376	0.396306	-0.594379	0.349645	0.147012	-9.61453	5.97952e-08	7.47746e-09	-0.350431	0.668584	0.41975	-0.862672	0.170953	0.122606	8.19377	0.00466359	0.00115653	-8.35843	0.00330567	0.000636664
C10090_9054	mmu_circ_0001628	mmu_circ_0001628	-0.484418	0.00683908	0.00201128	-0.738409	1.17629e-07	2.41872e-08	-0.455289	0.052424	0.0168183	-0.439272	0.00173907	0.00095735	0.143961	0.644322	0.383804	1.07737	3.2036e-12	2.08188e-13	0.00950578	0.976073	0.95161	1.13717	2.18854e-14	1.07177e-15	-0.0618708	0.777885	0.596734	-0.0133255	0.919321	0.807494
C10090_1333	mmu_circ_0001629	mmu_circ_0001629	-0.0951944	0.886196	0.77806	-1.17159	0.000480625	0.0002232	0.155262	0.834368	0.662108	0.596143	0.337367	0.278356	0.979028	0.0214599	0.00524994	1.42624	8.549e-05	2.42204e-05	-0.0837121	0.90524	0.77384	1.85341	9.94005e-10	9.4617e-11	-0.146563	0.769949	0.585736	-0.389727	0.184794	0.0707462
C10090_1424	mmu_circ_0001631	mmu_circ_0001631	0.67534	0.00554646	0.00161481	0.898734	0.000456603	0.000203424	-0.0584983	0.995587	0.987	0.476138	0.0953181	0.0694176	-0.200986	0.486165	0.238168	-3.55609	1.45305e-26	2.6809e-28	-0.23061	0.382886	0.170092	-11.8533	8.25309e-34	1.52219e-35	-8.37069	0.00231946	0.000404838	NA	NA	NA
C10090_8701	mmu_circ_0001632	mmu_circ_0001632	-8.40003	0.00205059	0.000342406	-8.40003	0.000242464	9.74236e-05	NA	NA	NA	NA	NA	NA	NA	NA	NA	NA	NA	NA	8.71012	0.000732806	4.36194e-05	NA	NA	NA	NA	NA	NA	NA	NA	NA
C10090_3725	mmu_circ_0001633	mmu_circ_0001633	0.904827	0.0293835	0.00974996	0.736692	0.126763	0.0949748	0.519269	0.289406	0.129081	0.513174	0.341041	0.281912	-0.634496	0.16372	0.0537264	-10.2622	2.79532e-12	1.7879e-13	0.0302172	0.992051	0.98107	-10.1471	2.57187e-10	2.2082e-11	NA	NA	NA	NA	NA	NA
C10090_11035	mmu_circ_0001634	mmu_circ_0001634	NA	NA	NA	NA	NA	NA	NA	NA	NA	NA	NA	NA	8.21286	0.00240827	0.000348676	NA	NA	NA	NA	NA	NA	NA	NA	NA	NA	NA	NA	NA	NA	NA
C10090_12271	mmu_circ_0001636	mmu_circ_0001636	0.489894	0.559249	0.360212	-8.52552	0.000112792	4.25894e-05	9.64404	2.61939e-06	3.86276e-08	NA	NA	NA	NA	NA	NA	NA	NA	NA	NA	NA	NA	8.73674	0.000186395	6.19208e-05	NA	NA	NA	-0.335861	0.760587	0.554214
C10090_3811	mmu_circ_0001640	mmu_circ_0001640	-8.40003	0.00189006	0.000342406	-8.40003	0.000240134	9.74236e-05	NA	NA	NA	NA	NA	NA	NA	NA	NA	NA	NA	NA	NA	NA	NA	NA	NA	NA	NA	NA	NA	8.40088	0.00353198	0.000765178
C10090_11594	mmu_circ_0001641	mmu_circ_0001641	-0.450257	0.275356	0.134399	-1.69239	9.41994e-07	2.27138e-07	1.04469	0.013946	0.00399676	-0.137328	0.661216	0.603314	-0.401665	0.671017	0.408338	1.09132	0.00952201	0.0055262	-0.276538	0.740169	0.511224	0.515636	0.298372	0.229804	0.0727627	0.922186	0.839856	0.490033	0.395678	0.19588
C10090_2054	mmu_circ_0001642	mmu_circ_0001642	NA	NA	NA	8.7077	0.000276154	0.00011419	NA	NA	NA	8.70667	0.000612938	0.000277272	-8.7077	0.000255659	9.4495e-06	-8.7077	0.00015428	4.78212e-05	-0.499166	0.611516	0.35825	-0.0853494	0.921178	0.89208	NA	NA	NA	-8.62132	0.00127481	0.000147255
C10090_13867	mmu_circ_0001643	mmu_circ_0001643	NA	NA	NA	9.7077	5.81924e-08	1.15835e-08	NA	NA	NA	9.2914	1.44265e-05	4.38984e-06	-0.173012	0.822523	0.636082	-0.336799	0.484347	0.404516	0.460645	0.511937	0.274252	0.602962	0.198032	0.144294	0.201226	0.807247	0.644234	-0.56076	0.34463	0.163297
C10090_16100	mmu_circ_0001645	mmu_circ_0001645	NA	NA	NA	9.61453	1.70672e-07	3.6565e-08	NA	NA	NA	9.2211	2.46237e-05	7.93702e-06	-0.463256	0.495926	0.247102	-0.615653	0.215553	0.160361	0.0454486	0.983774	0.966104	-0.0148219	0.987159	0.982346	0.0427867	0.968615	0.942078	-0.805402	0.303432	0.136194
C10090_6829	mmu_circ_0001646	mmu_circ_0001646	8.84549	0.000286799	2.48656e-05	10.8369	4.57097e-17	3.7896e-18	NA	NA	NA	10.8764	7.70152e-16	6.91358e-17	-0.164758	0.746054	0.504428	-0.838046	0.00786389	0.00450908	-0.553273	0.107282	0.0338338	-0.795756	0.015382	0.00917962	0.158348	0.812082	0.654806	-0.185109	0.769559	0.577804
C10090_3647	mmu_circ_0001647	mmu_circ_0001647	-0.206156	0.786476	0.625898	0.182189	0.924728	0.908408	-0.581834	0.511898	0.293978	-0.140932	0.649533	0.589224	0.450635	0.35565	0.150772	0.964602	0.00245049	0.0012594	0.854913	0.0855458	0.025603	1.78935	5.69043e-07	9.096e-08	-0.0635411	0.904402	0.793328	-0.358029	0.334427	0.156176
C10090_4392	mmu_circ_0001653	mmu_circ_0001653	NA	NA	NA	10.2926	8.98896e-12	1.17504e-12	NA	NA	NA	9.2914	1.44474e-05	4.38984e-06	-0.49489	0.300893	0.118956	-10.2926	1.58094e-12	9.56084e-14	0.501227	0.461579	0.228572	-9.2914	6.41294e-06	1.31875e-06	NA	NA	NA	NA	NA	NA
C10090_11717	mmu_circ_0001655	mmu_circ_0001655	0.641897	0.395931	0.21942	0.504043	0.562966	0.502314	9.80171	4.94636e-07	5.3675e-09	9.2914	1.44788e-05	4.38984e-06	0.353061	0.676433	0.413844	1.01114	0.0185699	0.0112645	0.331383	0.698363	0.45274	0.87426	0.0418786	0.0265104	-0.525001	0.328207	0.160693	-0.0950031	0.878207	0.746952
C10090_2351	mmu_circ_0001656	mmu_circ_0001656	NA	NA	NA	9.51491	5.0717e-07	1.15422e-07	NA	NA	NA	9.7065	3.05791e-07	6.9501e-08	0.470361	0.411403	0.185581	1.22942	0.000407388	0.000146402	-0.129634	0.854377	0.684858	1.13719	0.00102374	0.000470744	0.519761	0.103032	0.036891	-0.773028	0.0351615	0.010386
C10090_14131	mmu_circ_0001659	mmu_circ_0001659	0.381804	0.170742	0.073606	-1.68756	1.12104e-08	1.98534e-09	0.0963164	0.737331	0.531354	-1.79619	1.8743e-07	4.16924e-08	0.809077	0.063352	0.0174777	0.53637	0.203984	0.150249	0.259686	0.791596	0.580636	1.06314	0.0110844	0.0064974	0.0427867	0.967881	0.915532	-0.255373	0.657007	0.426698
C10090_6748	mmu_circ_0001662	mmu_circ_0001662	-8.40003	0.00194169	0.000342406	0.477412	0.612021	0.556508	8.64422	0.00142928	0.000200036	NA	NA	NA	0.33518	0.720567	0.464388	-8.87744	5.09598e-05	1.36749e-05	8.87067	0.00028806	1.32359e-05	NA	NA	NA	NA	NA	NA	8.2635	0.00576336	0.00147413
C10090_6763	mmu_circ_0001664	mmu_circ_0001664	-8.40003	0.00193874	0.000342406	-8.40003	0.000238087	9.74236e-05	NA	NA	NA	NA	NA	NA	NA	NA	NA	NA	NA	NA	NA	NA	NA	NA	NA	NA	NA	NA	NA	NA	NA	NA
C10090_9215	mmu_circ_0001665	mmu_circ_0001665	-0.123196	0.751673	0.576276	-0.318691	0.037804	0.0263146	0.592269	0.0117612	0.00333462	-0.16755	0.350123	0.290652	-0.285187	0.404041	0.1816	0.855938	1.54723e-05	3.50172e-06	0.329988	0.384738	0.171236	1.472	1.43975e-12	9.18728e-14	-0.136567	0.606907	0.397342	-0.138284	0.563109	0.331334
C10090_966	mmu_circ_0001666	mmu_circ_0001666	-8.74786	0.000411141	3.91668e-05	-8.74786	2.55058e-05	8.13904e-06	NA	NA	NA	NA	NA	NA	7.94953	0.00643328	0.00132029	8.37069	0.000535731	0.000205704	NA	NA	NA	8.73674	0.000188804	6.19208e-05	-8.37069	0.00232892	0.000404838	0.11157	0.939154	0.8703
C10090_10357	mmu_circ_0001667	mmu_circ_0001667	NA	NA	NA	8.29278	0.00211708	0.00113783	NA	NA	NA	NA	NA	NA	-8.29278	0.00167425	0.000169237	-8.29278	0.00127522	0.000584804	NA	NA	NA	9.03645	2.69581e-05	6.69238e-06	NA	NA	NA	-9.03645	0.000154706	7.87752e-06
C10090_5790	mmu_circ_0001669	mmu_circ_0001669	NA	NA	NA	8.16692	0.00344563	0.00202156	NA	NA	NA	NA	NA	NA	-8.16692	0.00258318	0.000348152	-8.16692	0.00217029	0.0010936	8.08215	0.00786025	0.00156122	NA	NA	NA	NA	NA	NA	NA	NA	NA
C10090_3621	mmu_circ_0001670	mmu_circ_0001670	-0.287895	0.525453	0.326914	0.817685	0.0049693	0.002993	0.205288	0.63947	0.420442	1.3452	1.45493e-05	4.35998e-06	0.281314	0.294991	0.1159	-1.36878	3.36898e-07	5.03482e-08	-0.0254608	0.923724	0.817422	-1.04728	0.000106256	3.38342e-05	0.581804	0.134007	0.05102	-0.0624827	0.9136	0.796654
C10090_12385	mmu_circ_0001673	mmu_circ_0001673	-0.129561	0.765514	0.593852	0.455663	0.138211	0.104431	-0.237974	0.657285	0.439836	0.114161	0.950478	0.941276	0.321944	0.151066	0.0487408	0.324972	0.0869074	0.0589894	0.363019	0.165334	0.056838	0.829061	1.32062e-05	3.00408e-06	-0.388494	0.0782655	0.0268772	-0.533073	0.00534118	0.00124905
C10090_7249	mmu_circ_0001674	mmu_circ_0001674	NA	NA	NA	NA	NA	NA	NA	NA	NA	8.35843	0.00282566	0.00163882	8.32823	0.00150766	0.000179183	8.37069	0.000519102	0.000205704	-0.413573	0.718836	0.48628	0.678017	0.300263	0.231388	-8.37069	0.00216698	0.000404838	-9.03645	0.000142198	7.87752e-06
C10090_7516	mmu_circ_0001675	mmu_circ_0001675	-0.147657	0.784212	0.61885	0.149526	0.962144	0.956418	-0.705581	0.0385431	0.0119898	-0.923425	0.000250148	0.000102701	-0.16115	0.745118	0.504556	-0.664087	0.0284657	0.0176642	0.378393	0.403778	0.183168	-0.247503	0.524983	0.443514	-0.776615	0.0967085	0.0342614	-0.805402	0.100479	0.0338482
C10090_14382	mmu_circ_0001676	mmu_circ_0001676	8.75221	0.000443691	4.83228e-05	10.38	1.71017e-12	2.09516e-13	-0.166844	0.929508	0.861748	1.78869	0.000357173	0.000157408	0.105701	0.878832	0.707624	-0.610521	0.0972112	0.0666608	0.241464	0.685451	0.439072	-1.15226	0.00564596	0.00318266	-0.438366	0.485801	0.278928	0.48999	0.507444	0.284824
C10090_9271	mmu_circ_0001679	mmu_circ_0001679	-0.332322	0.587378	0.387132	0.246233	0.783108	0.743414	1.61098	0.000438709	3.85732e-05	1.47336	0.00181501	0.00100035	0.229439	0.685259	0.42666	0.139684	0.718608	0.648338	0.185928	0.778161	0.56233	0.230291	0.523627	0.441592	0.52323	0.163405	0.0651072	-0.156365	0.767114	0.56331
C10090_13891	mmu_circ_0001680	mmu_circ_0001680	-0.0363402	0.95403	0.913438	0.196994	0.817973	0.781212	-0.414671	0.412365	0.213296	0.365246	0.339767	0.280784	-0.304727	0.365536	0.157053	-0.872497	0.00116414	0.000523838	0.0146571	0.991171	0.979164	-0.780406	0.0051068	0.00285816	0.137181	0.811593	0.654028	0.194561	0.752202	0.541188
C10090_2103	mmu_circ_0001682	mmu_circ_0001682	-8.26256	0.0029551	0.000705366	-0.233001	0.613976	0.558412	8.40301	0.00330027	0.000745636	NA	NA	NA	-8.02956	0.00395854	0.000716208	0.204056	0.799352	0.746914	NA	NA	NA	NA	NA	NA	-8.23362	0.0037282	0.000822422	NA	NA	NA
C10090_2358	mmu_circ_0001683	mmu_circ_0001683	-0.454538	0.0596111	0.0214868	0.278214	0.447707	0.384956	-0.200394	0.660192	0.44472	0.24212	0.449614	0.385016	-0.178806	0.494118	0.245394	-1.08659	9.44048e-08	1.23667e-08	-0.174683	0.41968	0.198357	-1.05312	1.77347e-07	2.54158e-08	-0.0993506	0.813485	0.663046	0.248951	0.509588	0.286388
C10090_9288	mmu_circ_0001684	mmu_circ_0001684	-8.64097	0.0006884	8.06848e-05	0.590253	0.438962	0.376446	NA	NA	NA	9.1472	4.27971e-05	1.43504e-05	0.0970049	0.92814	0.821054	-9.23122	3.20544e-06	5.9798e-07	0.797507	0.151018	0.0507494	-9.1472	2.00924e-05	4.80906e-06	8.77873	0.000486038	3.903e-05	NA	NA	NA
C10090_6971	mmu_circ_0001688	mmu_circ_0001688	NA	NA	NA	NA	NA	NA	NA	NA	NA	8.48422	0.0016598	0.000906406	8.08746	0.00391352	0.000678492	NA	NA	NA	-0.160939	0.885679	0.74195	-8.48422	0.000977527	0.000445348	NA	NA	NA	NA	NA	NA
C10090_3847	mmu_circ_0001690	mmu_circ_0001690	NA	NA	NA	8.7077	0.000273574	0.00011419	NA	NA	NA	8.70667	0.000607326	0.000277272	-8.7077	0.000250131	9.4495e-06	0.596077	0.280051	0.214258	-0.76181	0.412506	0.189022	-0.0853494	0.920775	0.89208	-9.30378	1.33821e-05	3.38188e-07	-0.22044	0.844804	0.694842
C10090_5092	mmu_circ_0001692	mmu_circ_0001692	NA	NA	NA	9.35138	2.4838e-06	6.47328e-07	NA	NA	NA	9.4227	4.78317e-06	1.34287e-06	0.633892	0.227493	0.0828304	0.367494	0.433384	0.3568	-0.340547	0.650052	0.399426	-0.13845	0.820752	0.76629	-0.323555	0.628943	0.42083	-0.435936	0.598994	0.366852
C10090_693	mmu_circ_0001698	mmu_circ_0001698	NA	NA	NA	NA	NA	NA	NA	NA	NA	NA	NA	NA	7.94953	0.00646545	0.00132029	NA	NA	NA	NA	NA	NA	NA	NA	NA	NA	NA	NA	NA	NA	NA
C10090_14090	mmu_circ_0001699	mmu_circ_0001699	NA	NA	NA	NA	NA	NA	NA	NA	NA	NA	NA	NA	8.08746	0.00394605	0.000678492	8.49625	0.000273008	9.57038e-05	NA	NA	NA	NA	NA	NA	-8.49625	0.00138549	0.000199283	8.5263	0.00226154	0.000397182
C10090_14069	mmu_circ_0001700	mmu_circ_0001700	NA	NA	NA	10.2622	1.54609e-11	2.08768e-12	0.181019	0.846974	0.68743	1.1872	0.0419974	0.0291256	-1.11094	0.0081956	0.00189618	-0.221512	0.57449	0.494052	0.593662	0.225722	0.0840566	0.408604	0.332829	0.2598	0.0405164	0.968277	0.919566	-0.136788	0.836356	0.660094
C10090_5088	mmu_circ_0001701	mmu_circ_0001701	NA	NA	NA	9.09987	2.04367e-05	6.45016e-06	NA	NA	NA	8.59954	0.000984658	0.00050132	-0.565376	0.496319	0.247602	-9.09987	9.53325e-06	2.09114e-06	0.723739	0.352633	0.153191	-8.59954	0.000580507	0.000233212	NA	NA	NA	NA	NA	NA
C10090_611	mmu_circ_0001704	mmu_circ_0001704	-0.571664	0.306761	0.154981	0.0524727	0.837904	0.804202	-0.382461	0.588533	0.366482	-1.1331	0.00351042	0.00205296	-0.458388	0.419495	0.190516	-0.558035	0.191629	0.140638	-0.276532	0.749051	0.521582	0.976529	0.0267859	0.0164339	-0.315326	0.676617	0.47686	-0.375037	0.512814	0.28941
C10090_9878	mmu_circ_0001705	mmu_circ_0001705	0.167815	0.806193	0.65367	0.252441	0.804225	0.767422	0.446083	0.474733	0.262596	0.559103	0.36439	0.303618	0.0763493	0.932297	0.825874	-0.0673321	0.88727	0.856166	0.151036	0.875939	0.721168	1.63682	1.5204e-07	2.15312e-08	0.883606	0.0237505	0.00697818	-0.408102	0.194867	0.0754752
C10090_14278	mmu_circ_0001709	mmu_circ_0001709	8.43045	0.00185888	0.000354664	NA	NA	NA	8.26538	0.00560547	0.00143958	8.2211	0.00472696	0.00296306	7.94953	0.00596444	0.00132029	NA	NA	NA	-8.2211	0.00221074	0.000300122	-8.2211	0.0029971	0.00162404	NA	NA	NA	NA	NA	NA
C10090_2384	mmu_circ_0001710	mmu_circ_0001710	NA	NA	NA	8.02956	0.00585167	0.0035917	NA	NA	NA	8.48422	0.00170797	0.000906406	-8.02956	0.00394075	0.000716208	-8.02956	0.00383832	0.00204506	-8.48422	0.000900269	6.05444e-05	-8.48422	0.0010056	0.000445348	NA	NA	NA	NA	NA	NA
C10090_14267	mmu_circ_0001712	mmu_circ_0001712	NA	NA	NA	NA	NA	NA	NA	NA	NA	NA	NA	NA	NA	NA	NA	NA	NA	NA	NA	NA	NA	8.84361	9.66173e-05	2.94952e-05	NA	NA	NA	-8.84361	0.000427448	3.40588e-05
C10090_12550	mmu_circ_0001714	mmu_circ_0001714	8.16742	0.00502563	0.00133945	8.40812	0.00125131	0.00064042	-8.43212	0.00343181	0.000653132	0.167417	0.945924	0.932188	-8.40812	0.00104639	8.22666e-05	-8.40812	0.000753694	0.000312726	-8.59954	0.000493189	2.71934e-05	-8.59954	0.000582043	0.000233212	NA	NA	NA	NA	NA	NA
C10090_5354	mmu_circ_0001715	mmu_circ_0001715	0.167888	0.889379	0.78371	1.14555	0.0772094	0.055978	-0.664184	0.381396	0.188788	-1.4743	0.00425196	0.00251282	-0.136421	0.885468	0.733942	-9.40812	5.8537e-07	9.14416e-08	0.723462	0.440804	0.21451	-8.2211	0.00301361	0.00162404	NA	NA	NA	8.2635	0.00584962	0.00147413
C10090_3544	mmu_circ_0001717	mmu_circ_0001717	0.0798836	0.901155	0.803492	-0.432315	0.174428	0.135197	-0.836706	0.129588	0.0470902	-0.948317	0.011763	0.00767376	0.591559	0.253584	0.094764	-9.4625	3.33139e-07	4.88986e-08	0.031879	0.994472	0.990318	-9.2914	6.45286e-06	1.31875e-06	NA	NA	NA	8.40088	0.00353968	0.000765178
C10090_8981	mmu_circ_0001718	mmu_circ_0001718	0.792311	0.108747	0.0429518	-9.26256	2.62133e-07	5.68054e-08	0.857218	0.0123228	0.003511	-10.0172	1.96209e-10	2.87082e-11	NA	NA	NA	NA	NA	NA	NA	NA	NA	NA	NA	NA	NA	NA	NA	NA	NA	NA
C10090_253	mmu_circ_0001719	mmu_circ_0001719	NA	NA	NA	NA	NA	NA	8.26538	0.00594695	0.00143958	8.2211	0.00496209	0.00296306	NA	NA	NA	NA	NA	NA	-8.2211	0.00244385	0.000300122	-8.2211	0.00312805	0.00162404	NA	NA	NA	NA	NA	NA
C10090_11196	mmu_circ_0001722	mmu_circ_0001722	NA	NA	NA	8.7077	0.000274926	0.00011419	NA	NA	NA	NA	NA	NA	-0.379478	0.73479	0.483908	1.24809	0.00629623	0.00355986	8.87067	0.000307637	1.32359e-05	10.2063	3.17132e-11	2.42034e-12	-0.276667	0.65163	0.449092	-0.220582	0.710676	0.497406
C10090_2289	mmu_circ_0001723	mmu_circ_0001723	NA	NA	NA	NA	NA	NA	NA	NA	NA	8.2211	0.00487056	0.00296306	NA	NA	NA	NA	NA	NA	-8.2211	0.00236346	0.000300122	-8.2211	0.0030815	0.00162404	NA	NA	NA	NA	NA	NA
C10090_1473	mmu_circ_0001726	mmu_circ_0001726	1.61525	0.00236046	0.000474998	1.47757	0.00700502	0.00451524	-0.166796	0.926229	0.845306	0.303433	0.751911	0.70228	-0.120534	0.887153	0.72302	-9.87759	1.79942e-09	1.74851e-10	0.40168	0.612681	0.362004	-9.2211	1.14883e-05	2.51832e-06	NA	NA	NA	NA	NA	NA
C10090_8753	mmu_circ_0001727	mmu_circ_0001727	NA	NA	NA	NA	NA	NA	NA	NA	NA	NA	NA	NA	NA	NA	NA	NA	NA	NA	7.94486	0.0131748	0.00283418	NA	NA	NA	NA	NA	NA	NA	NA	NA
C10090_14964	mmu_circ_0001729	mmu_circ_0001729	0.557064	0.444153	0.254464	-0.133516	0.659628	0.606836	-0.529432	0.587237	0.366492	0.0783444	0.95987	0.951422	0.92035	0.132507	0.041346	0.756564	0.162681	0.117059	-0.487978	0.501816	0.259712	-0.000439578	0.995072	0.993806	0.407829	0.532478	0.32409	0.283659	0.751812	0.540376
C10090_13591	mmu_circ_0001731	mmu_circ_0001731	1.33373	0.00925477	0.0027638	1.19587	0.029203	0.02001	-0.24495	0.851881	0.70042	0.826072	0.0953438	0.0694992	0.768177	0.0405397	0.0105965	0.932585	0.00405246	0.0022414	0.023243	0.999077	0.99866	0.244171	0.528235	0.446598	0.292149	0.460365	0.259322	0.294048	0.578981	0.349272
C10090_12911	mmu_circ_0001732	mmu_circ_0001732	-0.589896	0.299091	0.149745	-0.280292	0.317267	0.260754	-0.120921	0.932556	0.870022	-0.521576	0.144239	0.109235	-0.128697	0.88967	0.729976	-0.00257887	0.998424	0.998424	0.539117	0.351236	0.151704	-0.0471768	0.941892	0.91813	0.347331	0.579489	0.366526	-0.854165	0.211069	0.082945
C10090_12041	mmu_circ_0001733	mmu_circ_0001733	0.904697	0.0603491	0.0218174	1.70888	1.38017e-05	4.22576e-06	0.970751	0.0580828	0.0188923	1.7887	2.87042e-05	9.26492e-06	0.0701912	0.894284	0.767364	-1.12796	0.000525949	0.00020928	0.276149	0.536411	0.28994	-0.560276	0.0922074	0.0622014	-0.438366	0.486	0.278928	-0.446509	0.395599	0.196867
C10090_13531	mmu_circ_0001738	mmu_circ_0001738	-0.0102866	0.999363	0.998026	-9.98499	9.16741e-12	1.20965e-12	-1.16667	0.0118417	0.00336734	-10.5027	1.8409e-14	1.82267e-15	NA	NA	NA	NA	NA	NA	NA	NA	NA	NA	NA	NA	NA	NA	NA	NA	NA	NA
C10090_10653	mmu_circ_0001745	mmu_circ_0001745	NA	NA	NA	9.02956	3.46859e-05	1.14599e-05	NA	NA	NA	9.54303	1.62633e-06	4.10786e-07	0.685712	0.246205	0.0911518	1.09132	0.00952537	0.0055262	-0.0134061	0.969647	0.922056	1.01682	0.00673684	0.0038433	-0.441758	0.4067	0.217086	-0.260876	0.606547	0.372622
C10090_8912	mmu_circ_0001747	mmu_circ_0001747	-0.531332	0.236206	0.110234	-0.39899	0.114335	0.0854052	0.543756	0.274727	0.120394	1.80502	2.14468e-07	4.78956e-08	0.810526	0.0135882	0.00324096	-0.246724	0.560138	0.479872	-0.197519	0.559664	0.309522	-1.63814	2.43443e-07	3.58172e-08	0.0977556	0.898147	0.802478	0.158835	0.853865	0.71558
C10090_6028	mmu_circ_0001748	mmu_circ_0001748	NA	NA	NA	NA	NA	NA	NA	NA	NA	NA	NA	NA	NA	NA	NA	NA	NA	NA	8.08215	0.00780282	0.00156122	NA	NA	NA	NA	NA	NA	NA	NA	NA
C10090_6329	mmu_circ_0001750	mmu_circ_0001750	-0.510351	0.511088	0.31319	0.999648	0.0319953	0.0220284	-0.0412062	0.98849	0.965112	0.373685	0.56344	0.498976	-0.208151	0.739583	0.493408	0.757795	0.00907799	0.00524804	0.434104	0.416926	0.195489	1.35956	1.05582e-05	2.301e-06	0.579673	0.0312745	0.00951382	0.432672	0.141466	0.050557
C10090_15553	mmu_circ_0001751	mmu_circ_0001751	-0.0951511	0.902391	0.805318	0.310176	0.640608	0.586578	-0.0292145	0.959765	0.919174	-0.211229	0.398531	0.33645	0.130341	0.826163	0.641428	-0.514295	0.161475	0.115959	0.234532	0.715494	0.476398	1.04404	0.000403875	0.000156516	1.19584	0.000683782	6.42762e-05	0.168074	0.713519	0.501246
C10090_631	mmu_circ_0001754	mmu_circ_0001754	NA	NA	NA	9.4625	8.71235e-07	2.0507e-07	-9.35843	3.20285e-05	9.179e-07	0.24111	0.799599	0.757728	-0.311232	0.706193	0.447914	-9.4625	3.3738e-07	4.88986e-08	-0.517392	0.419093	0.197643	-9.59954	3.42595e-07	5.19304e-08	NA	NA	NA	NA	NA	NA
C10090_15349	mmu_circ_0001758	mmu_circ_0001758	-0.170453	0.732831	0.553202	-1.20868	5.50931e-05	1.90842e-05	0.318717	0.328039	0.153797	-1.04772	0.00114465	0.000593856	0.505064	0.335478	0.138315	-9.61453	5.88307e-08	7.47746e-09	0.560173	0.282455	0.112321	-9.7065	1.03342e-07	1.42405e-08	NA	NA	NA	NA	NA	NA
C10090_15621	mmu_circ_0001760	mmu_circ_0001760	0.137998	0.618851	0.419302	-0.936551	2.59499e-06	6.91216e-07	0.0982238	0.579112	0.359488	-1.38407	2.32653e-10	3.49108e-11	-0.278402	0.521559	0.269992	-1.75557	2.41737e-06	4.39072e-07	0.112174	0.876287	0.725664	-1.9438	6.09086e-06	1.22799e-06	-0.749985	0.344262	0.172131	0.596862	0.477574	0.259052
C10090_5085	mmu_circ_0001763	mmu_circ_0001763	NA	NA	NA	NA	NA	NA	NA	NA	NA	NA	NA	NA	NA	NA	NA	NA	NA	NA	7.94486	0.012073	0.00283418	NA	NA	NA	NA	NA	NA	NA	NA	NA
C10090_3807	mmu_circ_0001764	mmu_circ_0001764	-0.343099	0.68969	0.499596	0.876558	0.0843034	0.0614846	-9.86527	2.67164e-07	2.6761e-09	0.648557	0.146399	0.111063	0.516807	0.212163	0.0748226	-0.568692	0.171304	0.124001	-0.431677	0.318664	0.131845	-1.47738	0.000415771	0.000161302	-0.376735	0.602101	0.391778	0.297154	0.767938	0.565906
C10090_14591	mmu_circ_0001766	mmu_circ_0001766	-8.84737	0.000243323	1.90127e-05	-8.84737	1.19492e-05	3.55802e-06	NA	NA	NA	NA	NA	NA	NA	NA	NA	NA	NA	NA	NA	NA	NA	NA	NA	NA	NA	NA	NA	NA	NA	NA
C10090_7351	mmu_circ_0001768	mmu_circ_0001768	0.904896	0.19002	0.0837978	2.45733	2.51535e-08	4.73338e-09	0.610979	0.348899	0.166877	2.00387	2.08314e-06	5.4038e-07	-0.0397358	0.946323	0.865546	0.357871	0.18128	0.131705	0.00497494	0.976785	0.94802	0.0920584	0.777378	0.71673	-0.510548	0.108011	0.0390308	0.156574	0.766347	0.570334
C10090_16031	mmu_circ_0001770	mmu_circ_0001770	-0.336255	0.396249	0.218642	1.11097	5.48528e-06	1.52413e-06	-0.166751	0.850028	0.697004	0.788761	0.00413629	0.00243718	-0.327216	0.149808	0.0482738	0.16843	0.371792	0.299232	0.283458	0.309448	0.126998	0.645499	0.000512195	0.000200122	-0.393317	0.0602074	0.0199506	-0.175866	0.44847	0.235336
C10090_6797	mmu_circ_0001771	mmu_circ_0001771	NA	NA	NA	NA	NA	NA	NA	NA	NA	NA	NA	NA	8.43505	0.00100878	9.20818e-05	NA	NA	NA	8.2075	0.00489618	0.000860002	NA	NA	NA	NA	NA	NA	NA	NA	NA
C10090_10071	mmu_circ_0001773	mmu_circ_0001773	NA	NA	NA	NA	NA	NA	NA	NA	NA	NA	NA	NA	NA	NA	NA	8.49625	0.000276566	9.57038e-05	NA	NA	NA	9.42857	9.79925e-07	1.64117e-07	0.0758771	0.96558	0.907882	-9.42857	8.86316e-06	2.0267e-07
C10090_3547	mmu_circ_0001776	mmu_circ_0001776	NA	NA	NA	8.16692	0.00348957	0.00202156	NA	NA	NA	8.59954	0.000991946	0.00050132	-0.0794534	0.955205	0.892786	0.444846	0.534415	0.453124	-0.06972	0.942437	0.854846	0.524322	0.40475	0.325636	-0.280398	0.801902	0.63334	-0.182522	0.851945	0.692682
C10090_13575	mmu_circ_0001777	mmu_circ_0001777	-0.576329	0.010636	0.0032019	-1.97711	5.35905e-18	4.20102e-19	0.580918	0.00542346	0.00129928	-1.26573	1.98842e-06	5.14934e-07	0.990514	0.00202651	0.000244986	-0.0306909	0.94708	0.929606	0.460615	0.31781	0.131359	0.552237	0.103232	0.0700982	0.48756	0.288952	0.134307	-0.122951	0.806503	0.625506
C10090_5191	mmu_circ_0001781	mmu_circ_0001781	-0.150763	0.785349	0.621008	-0.179586	0.315283	0.258994	0.0725004	0.768784	0.59338	-0.283972	0.191999	0.149121	0.531132	0.110303	0.0331562	1.12296	8.45031e-06	1.76005e-06	-0.00509388	0.966978	0.91871	0.937392	0.000182285	5.9319e-05	-0.570173	0.0294152	0.00887874	-0.213994	0.487999	0.268618
C10090_13820	mmu_circ_0001782	mmu_circ_0001782	NA	NA	NA	NA	NA	NA	NA	NA	NA	NA	NA	NA	NA	NA	NA	8.61176	0.000145966	4.4526e-05	NA	NA	NA	NA	NA	NA	-8.61176	0.000870743	9.80974e-05	NA	NA	NA
C10090_2881	mmu_circ_0001783	mmu_circ_0001783	NA	NA	NA	NA	NA	NA	NA	NA	NA	NA	NA	NA	8.71528	0.000294218	1.24969e-05	NA	NA	NA	7.94486	0.0126942	0.00283418	NA	NA	NA	NA	NA	NA	NA	NA	NA
C10090_11656	mmu_circ_0001784	mmu_circ_0001784	NA	NA	NA	8.16692	0.00349328	0.00202156	NA	NA	NA	NA	NA	NA	-0.217381	0.888952	0.730658	-8.16692	0.00220985	0.0010936	8.43003	0.00230529	0.000260958	NA	NA	NA	NA	NA	NA	NA	NA	NA
C10090_5244	mmu_circ_0001788	mmu_circ_0001788	-0.571664	0.306599	0.154981	1.24278	0.000237588	9.76582e-05	-0.166629	0.90512	0.796576	1.63681	1.36968e-06	3.40838e-07	0.314764	0.3049	0.121474	-0.142618	0.613163	0.533218	-0.308813	0.31448	0.129588	0.0547104	0.847196	0.800858	-0.310979	0.406999	0.21763	-0.416935	0.174026	0.065106
C10090_12693	mmu_circ_0001790	mmu_circ_0001790	-0.535744	0.500301	0.304036	-9.18859	5.6136e-07	1.29943e-07	-8.91767	0.000455918	3.52658e-05	-8.91767	3.43667e-05	1.13346e-05	NA	NA	NA	NA	NA	NA	8.2075	0.00508357	0.000860002	NA	NA	NA	NA	NA	NA	NA	NA	NA
C10090_4535	mmu_circ_0001791	mmu_circ_0001791	0.0624166	0.92946	0.856088	0.558459	0.289298	0.236164	-0.38917	0.636248	0.417084	-0.495124	0.184836	0.143111	-0.286238	0.626214	0.364194	-0.895646	0.0267185	0.0165361	-0.0450512	0.946897	0.863836	0.005874	0.986882	0.982698	0.152984	0.869031	0.73685	-0.239239	0.769157	0.57714
C10090_13822	mmu_circ_0001792	mmu_circ_0001792	-0.26766	0.500067	0.304162	-0.0607476	0.470784	0.40818	-0.188072	0.789185	0.613298	-0.190173	0.299056	0.242864	0.480855	0.0739836	0.0209094	-0.760554	0.00891241	0.00514866	0.369986	0.286267	0.114256	-0.479497	0.119654	0.0822128	-1.00504	0.0262855	0.00779748	-0.88629	0.0342884	0.0100796
C10090_3058	mmu_circ_0001794	mmu_circ_0001794	0.295209	0.328803	0.169637	0.172258	0.888418	0.865264	0.037312	0.828014	0.654532	-0.492613	0.0215069	0.0143947	-0.00802253	0.988409	0.964996	1.57214	1.19083e-20	3.29566e-22	0.286203	0.490008	0.25094	2.28471	8.05193e-38	1.26318e-39	-0.51489	0.00144328	0.000191233	-0.805452	1.15801e-07	1.55602e-09
C10090_1369	mmu_circ_0001796	mmu_circ_0001796	NA	NA	NA	NA	NA	NA	NA	NA	NA	NA	NA	NA	NA	NA	NA	NA	NA	NA	NA	NA	NA	NA	NA	NA	NA	NA	NA	8.2635	0.00614871	0.00147413
C10090_14900	mmu_circ_0001797	mmu_circ_0001797	-0.0951466	0.939753	0.892476	1.61503	0.00378169	0.00225908	0.38066	0.621476	0.402386	0.480508	0.532516	0.468778	0.364869	0.501931	0.252144	-0.0118576	0.981784	0.975746	0.540856	0.411984	0.189127	1.10253	0.00630669	0.00358186	-0.408968	0.497422	0.293002	-0.808776	0.0714385	0.0229708
C10090_6412	mmu_circ_0001798	mmu_circ_0001798	-8.94046	0.000148026	9.22932e-06	-8.94046	5.50837e-06	1.55541e-06	NA	NA	NA	8.48422	0.00166516	0.000906406	8.6279	0.000447685	2.43178e-05	8.91139	1.88236e-05	4.48402e-06	0.460347	0.667965	0.418106	0.0116363	0.981569	0.975326	-8.91139	0.000187658	1.17009e-05	0.253009	0.837463	0.695912
C10090_12670	mmu_circ_0001799	mmu_circ_0001799	0.127324	0.910598	0.817272	-8.52552	0.000112609	4.25894e-05	8.26538	0.00591974	0.00143958	NA	NA	NA	NA	NA	NA	NA	NA	NA	7.94486	0.0122253	0.00283418	NA	NA	NA	NA	NA	NA	NA	NA	NA
C10090_12042	mmu_circ_0001803	mmu_circ_0001803	0.297228	0.718553	0.528772	0.522042	0.470895	0.40731	-8.91767	0.000404937	3.52658e-05	-0.318129	0.514364	0.449064	0.487179	0.397037	0.176993	0.35592	0.431129	0.35459	0.110577	0.958222	0.883574	0.34356	0.611563	0.530272	0.182563	0.795972	0.625084	0.390502	0.674372	0.45133
C10090_586	mmu_circ_0001804	mmu_circ_0001804	-8.40003	0.00205719	0.000342406	-0.233109	0.59879	0.540668	0.759429	0.315619	0.145866	-8.43212	0.000607115	0.000284122	0.460982	0.686712	0.425742	0.651346	0.327088	0.257084	9.08215	9.62989e-05	2.21238e-06	9.73674	3.22313e-08	4.02464e-09	-8.81826	0.000329977	2.37702e-05	-0.473471	0.473158	0.255318
C10090_9788	mmu_circ_0001805	mmu_circ_0001805	-0.735309	0.00250552	0.000508882	-0.306973	0.0290535	0.0199016	-0.903674	0.0022663	0.000416182	-0.305395	0.0812639	0.0585744	-0.212289	0.52854	0.276844	-2.38115	6.897e-14	3.64786e-15	0.178609	0.680421	0.430308	-1.81493	2.64963e-08	3.2355e-09	0.799911	0.137337	0.0526446	-0.91826	0.161997	0.0597274
C10090_15521	mmu_circ_0001807	mmu_circ_0001807	NA	NA	NA	8.40812	0.00123253	0.00064042	NA	NA	NA	9.06905	7.16872e-05	2.59462e-05	-8.40812	0.00100214	8.22666e-05	0.310587	0.651188	0.575496	-0.0539107	0.945414	0.861298	-0.0325985	0.967377	0.955892	-0.524932	0.590318	0.380486	-9.03645	0.000141595	7.87752e-06
C10090_3820	mmu_circ_0001814	mmu_circ_0001814	-0.54291	1.1912e-06	2.32694e-08	-2.95921	1.63543e-108	1.2082e-110	0.370708	0.00072667	7.80452e-05	-2.65324	1.31557e-50	3.01032e-52	-0.229842	0.581769	0.322664	-1.43552	1.11689e-05	2.49114e-06	0.790089	0.00605031	0.0010842	-10.6271	2.71808e-14	1.34838e-15	-0.418175	0.534558	0.326366	9.02873	0.000249957	1.49668e-05
C10090_8626	mmu_circ_0001817	mmu_circ_0001817	-0.510252	1.39068e-10	1.37691e-12	0.188016	0.420933	0.358998	-0.244418	0.016657	0.0048803	-0.583048	1.81709e-22	1.09945e-23	-0.100028	0.217287	0.0774724	0.353836	2.09178e-09	2.07548e-10	0.318198	0.000153287	4.7382e-06	1.1853	3.95002e-84	2.26098e-86	-0.889291	1.05955e-43	1.00099e-46	-0.765687	1.23641e-40	1.45734e-43
C10090_1711	mmu_circ_0001818	mmu_circ_0001818	-1.31757	0.00189093	0.000308662	-0.262708	0.22133	0.17591	0.126945	0.768048	0.592598	0.506955	0.268128	0.2158	0.525072	0.153244	0.0496	0.922678	0.00094436	0.00040326	-0.141424	0.778023	0.561418	0.98834	0.000184149	6.21898e-05	0.343048	0.260392	0.117281	0.276305	0.391394	0.193298
C10090_14467	mmu_circ_0001819	mmu_circ_0001819	-0.696641	0.114267	0.0456516	-0.30002	0.206331	0.163058	0.205288	0.639741	0.420442	0.286287	0.629598	0.568924	0.97072	0.00199967	0.000241332	1.36602	7.0479e-07	1.13419e-07	-0.1334	0.799269	0.591272	1.22462	2.76589e-06	5.2128e-07	0.312627	0.266807	0.121746	0.163359	0.669055	0.44651
C10090_14119	mmu_circ_0001820	mmu_circ_0001820	-0.580718	0.21505	0.0978286	0.328846	0.565364	0.505034	-1.31118	0.00513016	0.00122473	0.124345	0.948555	0.936868	0.0320573	0.955156	0.903858	0.757497	0.00261318	0.00134623	-0.30391	0.489679	0.250362	0.917066	0.000470697	0.000183409	0.0672076	0.895358	0.7689	-0.0329343	0.922422	0.818046
C10090_7063	mmu_circ_0001821	mmu_circ_0001821	-0.7274	0.18674	0.0820016	0.695489	0.105251	0.0779068	0.980175	0.0664754	0.022029	2.15138	1.38482e-07	2.97684e-08	0.187196	0.719156	0.465388	-1.03495	0.00365767	0.00191431	-0.256468	0.488486	0.249548	-0.251344	0.41203	0.332978	1.27064	0.000974077	0.00011388	-0.321748	0.451427	0.239548
C10090_15926	mmu_circ_0001822	mmu_circ_0001822	-0.139655	0.860711	0.718372	-9.98499	9.13898e-12	1.20965e-12	-0.548519	0.315248	0.145432	-10.5366	8.41424e-15	8.1458e-16	NA	NA	NA	NA	NA	NA	NA	NA	NA	NA	NA	NA	NA	NA	NA	NA	NA	NA
C10090_7597	mmu_circ_0001828	mmu_circ_0001828	NA	NA	NA	8.16692	0.0034134	0.00202156	NA	NA	NA	8.48422	0.00165446	0.000906406	0.548359	0.593235	0.334838	1.06646	0.0693442	0.0463574	0.225899	0.876454	0.725436	2.04394	7.15855e-06	1.49636e-06	0.923841	0.0569716	0.0187169	0.168111	0.789009	0.604684
C10090_12527	mmu_circ_0001829	mmu_circ_0001829	NA	NA	NA	8.02956	0.00575546	0.0035917	NA	NA	NA	NA	NA	NA	0.768098	0.401595	0.180009	1.34134	0.0200247	0.0121922	8.52982	0.001425	0.00014375	9.99053	1.02998e-09	9.86964e-11	-0.106932	0.903302	0.799616	-0.00482982	0.983582	0.951352
C10090_9009	mmu_circ_0001830	mmu_circ_0001830	NA	NA	NA	NA	NA	NA	NA	NA	NA	NA	NA	NA	NA	NA	NA	NA	NA	NA	NA	NA	NA	9.12386	1.39619e-05	3.18782e-06	NA	NA	NA	-0.0951278	0.92331	0.82014
C10090_10255	mmu_circ_0001832	mmu_circ_0001832	NA	NA	NA	8.79507	0.000164579	6.42714e-05	NA	NA	NA	8.59954	0.000996719	0.00050132	-0.0797899	0.948847	0.868436	-0.561446	0.416118	0.338746	0.415595	0.69953	0.45262	0.0217783	0.972038	0.961528	0.545115	0.579407	0.367706	0.226991	0.854796	0.717166
C10090_7552	mmu_circ_0001833	mmu_circ_0001833	-0.0952312	0.916787	0.831168	1.75317	1.09787e-07	2.25296e-08	-1.21113	0.0246664	0.007426	1.40255	6.19862e-06	1.75389e-06	0.0916379	0.826877	0.642826	-0.0564077	0.830718	0.783886	-0.220359	0.468727	0.233776	-0.0292069	0.921042	0.890972	0.488219	0.0512126	0.0165104	0.0279139	0.986243	0.954856
C10090_7733	mmu_circ_0001834	mmu_circ_0001834	NA	NA	NA	8.16692	0.00340749	0.00202156	NA	NA	NA	8.9867	0.000123388	4.69118e-05	-8.16692	0.00251832	0.000348152	0.329338	0.657629	0.58375	-8.9867	5.2987e-05	1.10666e-06	-0.628264	0.357877	0.282614	-0.0396948	0.968264	0.93762	-8.35843	0.00313673	0.000636664
C10090_13384	mmu_circ_0001835	mmu_circ_0001835	-0.10269	0.722545	0.532676	-2.366	2.49058e-31	9.71086e-33	-0.497623	0.0347966	0.0107372	-2.84177	1.40317e-30	5.5571e-32	0.242137	0.673859	0.411168	-1.55528	0.00063925	0.00025646	-0.0699152	0.919813	0.807814	-9.59954	3.38337e-07	5.19304e-08	0.34737	0.720211	0.528336	NA	NA	NA
C10090_14524	mmu_circ_0001836	mmu_circ_0001836	NA	NA	NA	8.29278	0.00206812	0.00113783	NA	NA	NA	NA	NA	NA	-8.29278	0.00156961	0.000169237	-0.0591621	0.95133	0.937288	NA	NA	NA	NA	NA	NA	-8.23362	0.00353158	0.000822422	NA	NA	NA
C10090_7902	mmu_circ_0001840	mmu_circ_0001840	NA	NA	NA	8.51491	0.000734631	0.000360456	NA	NA	NA	NA	NA	NA	0.0195862	0.991397	0.977226	-8.51491	0.000440708	0.000167231	7.94486	0.0115196	0.00283418	NA	NA	NA	NA	NA	NA	NA	NA	NA
C10090_15328	mmu_circ_0001841	mmu_circ_0001841	0.853384	1.77888e-05	6.56904e-07	0.100478	0.887651	0.863424	0.446265	0.00915588	0.00256538	-0.311629	0.0456811	0.031831	-0.186773	0.570806	0.312154	-1.72913	1.93596e-10	1.64307e-11	0.0377025	0.969856	0.922052	-1.75033	1.11265e-09	1.07326e-10	-0.177061	0.79214	0.617772	-0.679978	0.231922	0.0938184
C10090_5591	mmu_circ_0001842	mmu_circ_0001842	NA	NA	NA	NA	NA	NA	NA	NA	NA	8.35843	0.00284944	0.00163882	NA	NA	NA	NA	NA	NA	-8.35843	0.00148372	0.000134799	0	0.992806	0.99028	8.57213	0.00118923	0.000151392	0.752965	0.398214	0.198826
C10090_13027	mmu_circ_0001843	mmu_circ_0001843	NA	NA	NA	NA	NA	NA	NA	NA	NA	8.48422	0.0016801	0.000906406	NA	NA	NA	NA	NA	NA	-8.48422	0.000852608	6.05444e-05	-8.48422	0.000990432	0.000445348	8.67913	0.000756892	7.6869e-05	8.5263	0.00230485	0.000397182
C10090_3316	mmu_circ_0001844	mmu_circ_0001844	NA	NA	NA	NA	NA	NA	-0.429848	0.759766	0.555344	-8.69523	0.000147301	5.67488e-05	NA	NA	NA	NA	NA	NA	NA	NA	NA	NA	NA	NA	NA	NA	NA	NA	NA	NA
C10090_10802	mmu_circ_0001845	mmu_circ_0001845	-0.0318802	0.942277	0.896134	-1.76349	3.66884e-18	2.82334e-19	-0.661091	0.00330603	0.000619076	-1.82318	9.68888e-19	7.14142e-20	0.187652	0.734147	0.484384	-0.421802	0.235792	0.17711	0.262502	0.6022	0.348642	-0.198404	0.594552	0.510228	-0.999042	0.0459259	0.0145674	-0.0949598	0.859571	0.724212
C10090_1241	mmu_circ_0001846	mmu_circ_0001846	0.452279	0.0063861	0.00187636	-1.0426	2.14878e-09	3.56734e-10	-0.469973	0.020176	0.00598994	-1.52294	3.37032e-19	2.43968e-20	0.0293523	0.953768	0.89378	-1.68693	2.00556e-07	2.8369e-08	-0.515858	0.0697955	0.0204372	-0.845962	0.00270381	0.00139289	0.767636	0.103828	0.0372252	-0.0293321	0.945399	0.881436
C10090_8005	mmu_circ_0001850	mmu_circ_0001850	-0.255784	0.779794	0.612442	1.94532	1.67055e-07	3.50702e-08	-0.389151	0.692989	0.482624	1.9664	1.07848e-08	1.95051e-09	-0.220724	0.586102	0.326982	1.74333	1.42335e-23	3.0638e-25	-0.27643	0.360544	0.158209	1.35519	2.38355e-14	1.17232e-15	-0.104601	0.610317	0.400872	0.145056	0.556963	0.32588
C10090_12908	mmu_circ_0001851	mmu_circ_0001851	0.188528	0.784989	0.629966	-0.669072	0.107967	0.0802052	-9.75422	9.40697e-07	1.15166e-08	-0.948153	0.0354513	0.0244298	0.225081	0.82605	0.641846	0.364301	0.532811	0.450672	0.460486	0.612891	0.36072	0.47818	0.418195	0.338492	0.882292	0.0862774	0.0299546	0.866517	0.102063	0.0344782
C10090_13803	mmu_circ_0001852	mmu_circ_0001852	0.489671	0.448318	0.25817	0.240767	0.858309	0.828366	0.570225	0.369534	0.181477	-0.310697	0.50685	0.441166	-0.636105	0.370323	0.16032	-0.118001	0.836088	0.792724	0.164004	0.912737	0.795118	0.721901	0.200458	0.146232	-1.03961	0.149739	0.0583182	-0.317173	0.694714	0.473788
C10090_5346	mmu_circ_0001853	mmu_circ_0001853	8.16742	0.00488345	0.00133945	13.0999	1.25547e-82	1.52006e-84	9.33606	3.35503e-05	1.03619e-06	12.9104	2.85193e-65	4.83166e-67	-0.196039	0.229661	0.0837136	-0.979021	1.35769e-11	9.43538e-13	0.0161565	0.992088	0.982764	-1.10589	3.73423e-11	2.8737e-12	-0.416236	0.0570556	0.0187715	-0.47078	0.0628039	0.0198983
C10090_3911	mmu_circ_0001854	mmu_circ_0001854	-0.0951572	0.932957	0.870044	0.108279	0.952115	0.940196	-8.91767	0.000407541	3.52658e-05	0.0690249	0.949216	0.938774	-0.742789	0.37393	0.162416	0.710752	0.140246	0.0996498	0.0954537	0.956881	0.886734	-0.365376	0.598554	0.514678	-0.209636	0.778657	0.597694	0.490077	0.61781	0.38726
C10090_7353	mmu_circ_0001859	mmu_circ_0001859	-0.0952312	0.936921	0.878504	-0.0266261	0.790974	0.753316	NA	NA	NA	9.6541	5.31281e-07	1.25661e-07	0.335485	0.745502	0.506034	1.88211	8.89275e-06	1.86132e-06	-0.276455	0.693539	0.44744	0.469634	0.272046	0.206644	-0.101134	0.858337	0.721498	0.545595	0.232232	0.0941082
C10090_9728	mmu_circ_0001861	mmu_circ_0001861	-8.74786	0.000403213	3.91668e-05	1.12973	0.0361804	0.0251102	-8.69523	0.00121752	0.000151767	0.727467	0.281463	0.2274	-1.54936	0.00296669	0.000459816	-0.322235	0.474324	0.394978	-0.276254	0.717414	0.482172	-0.801376	0.166106	0.118743	-0.596223	0.362909	0.185826	0.320022	0.777495	0.592744
C10090_15326	mmu_circ_0001862	mmu_circ_0001862	NA	NA	NA	NA	NA	NA	NA	NA	NA	NA	NA	NA	NA	NA	NA	NA	NA	NA	NA	NA	NA	NA	NA	NA	8.57213	0.00116544	0.000151392	8.2635	0.00574219	0.00147413
C10090_7887	mmu_circ_0001863	mmu_circ_0001863	-0.0338938	0.975752	0.953036	-9.46414	2.50549e-08	4.74568e-09	NA	NA	NA	NA	NA	NA	NA	NA	NA	NA	NA	NA	NA	NA	NA	NA	NA	NA	8.57213	0.00115287	0.000151392	NA	NA	NA
C10090_13271	mmu_circ_0001865	mmu_circ_0001865	NA	NA	NA	9.83684	1.15289e-08	2.0654e-09	NA	NA	NA	10.3585	3.88158e-11	5.32916e-12	0.148433	0.841398	0.660816	-1.34058	0.00639022	0.00362086	-0.0918719	0.864962	0.70364	-0.798591	0.0463549	0.0295504	0.697517	0.371447	0.191338	0.288359	0.714238	0.502088
C10090_11806	mmu_circ_0001867	mmu_circ_0001867	0.252819	0.814049	0.662	0.00809189	0.845296	0.812164	-0.282243	0.843249	0.703646	-8.81089	7.24054e-05	2.53618e-05	0.307158	0.797482	0.574376	0.410145	0.533251	0.454214	7.94486	0.012484	0.00283418	NA	NA	NA	-8.81826	0.000316488	2.37702e-05	NA	NA	NA
C10090_2993	mmu_circ_0001869	mmu_circ_0001869	NA	NA	NA	8.61434	0.000463499	0.000202882	NA	NA	NA	8.35843	0.00287696	0.00163882	-0.401481	0.72699	0.475208	0.545025	0.348082	0.275868	-0.150929	0.898625	0.763306	0.378309	0.60588	0.523546	-0.380633	0.647416	0.442824	0.664139	0.402795	0.202252
C10090_3964	mmu_circ_0001870	mmu_circ_0001870	-0.235443	0.629514	0.430738	1.39585	1.6126e-08	2.94854e-09	-0.117801	0.922406	0.834118	0.964205	0.00021912	8.97212e-05	-0.283659	0.227373	0.0826008	-0.179869	0.35609	0.282872	0.108014	0.800186	0.596964	0.137168	0.523971	0.442104	0.42791	0.0362104	0.0112206	0.0111656	0.993945	0.979418
C10090_1240	mmu_circ_0001874	mmu_circ_0001874	0.0251086	0.970066	0.93606	0.050774	0.857021	0.825892	-1.16675	0.0807663	0.0275064	-0.0413034	0.768793	0.722276	-0.639315	0.33102	0.13526	-9.51491	1.87302e-07	2.61486e-08	-1.03131	0.0662616	0.019181	-9.6541	1.88638e-07	2.7194e-08	NA	NA	NA	NA	NA	NA
C10090_14961	mmu_circ_0001875	mmu_circ_0001875	-1.0078	0.0540549	0.019296	-0.188561	0.427416	0.364966	0.318695	0.658426	0.443164	-0.0306699	0.825228	0.78837	-0.217354	0.781757	0.54996	-9.75205	1.01968e-08	1.14343e-09	-0.193905	0.831055	0.652972	-8.9867	6.06025e-05	1.75371e-05	NA	NA	NA	NA	NA	NA
C10090_9257	mmu_circ_0001888	mmu_circ_0001888	NA	NA	NA	10.0296	7.44133e-10	1.16667e-10	NA	NA	NA	9.6541	5.35265e-07	1.25661e-07	-0.401847	0.488196	0.24026	-1.79594	0.000330614	0.000117728	-0.031315	0.958653	0.88297	-9.6541	1.88916e-07	2.7194e-08	-8.23362	0.00374826	0.000822422	NA	NA	NA
C10090_2758	mmu_circ_0001889	mmu_circ_0001889	0.139236	0.872899	0.760312	1.10573	0.0236157	0.016012	0.0138535	0.942809	0.889032	0.636734	0.31081	0.25323	-0.0467152	0.950571	0.876808	-0.763007	0.062078	0.0410926	0.460554	0.438168	0.212312	-0.617651	0.23731	0.177039	0.201226	0.808203	0.644234	0.297154	0.768429	0.565906
C10090_3057	mmu_circ_0001894	mmu_circ_0001894	NA	NA	NA	8.7077	0.000275062	0.00011419	NA	NA	NA	8.80607	0.000356521	0.000153355	0.67492	0.336504	0.139013	-0.474085	0.509386	0.427934	-0.0959486	0.919669	0.808456	0.0375408	0.955341	0.936708	-8.23362	0.00367314	0.000822422	-0.317303	0.762614	0.559286
C10090_14022	mmu_circ_0001895	mmu_circ_0001895	-0.487442	0.518087	0.321638	1.44078	0.000296463	0.000126482	0.640832	0.368025	0.180531	1.98531	1.59275e-05	4.88164e-06	0.0239454	0.969531	0.925974	-1.54034	2.75414e-05	6.7075e-06	0.0715107	0.93797	0.847268	-0.889372	0.0127498	0.007525	-0.554252	0.472474	0.268598	-1.14947	0.0470073	0.0143837
C10090_15262	mmu_circ_0001898	mmu_circ_0001898	-0.711924	0.287875	0.142821	-0.949226	0.0357194	0.0247756	0.0260165	0.935239	0.875388	0.736429	0.231823	0.182959	0.505235	0.574057	0.317214	-8.51491	0.000442621	0.000167231	-0.507658	0.418311	0.196575	-9.6541	1.86174e-07	2.7194e-08	NA	NA	NA	NA	NA	NA
C10090_6403	mmu_circ_0001900	mmu_circ_0001900	0.0490991	0.945039	0.90129	0.273913	0.800469	0.763016	-8.91767	0.000432578	3.52658e-05	0.505025	0.484712	0.419444	-0.375305	0.628058	0.366036	-0.0274571	0.962783	0.95173	0.329351	0.681902	0.433666	0.86155	0.035705	0.0223298	0.829046	0.0760012	0.025956	-0.0209765	0.96235	0.90813
C10090_14718	mmu_circ_0001911	mmu_circ_0001911	9.43024	4.35004e-06	1.22225e-07	10.4625	3.18817e-13	3.73578e-14	0.186891	0.769077	0.591252	1.11072	0.0147616	0.00973062	0.165305	0.775369	0.539924	1.43765	1.4762e-09	1.41023e-10	-0.0403105	0.929878	0.831996	1.13713	3.45922e-05	8.92488e-06	0.337956	0.132855	0.0502992	0.413217	0.127174	0.0444598
C10090_531	mmu_circ_0001913	mmu_circ_0001913	1.48978	0.00555799	0.00161966	2.45733	2.5181e-08	4.73338e-09	-0.891124	0.0825724	0.0281904	0.606886	0.110094	0.0812684	-0.142083	0.785912	0.559944	1.76835	2.66733e-20	7.49128e-22	0.0669075	0.937902	0.845052	1.42867	9.77659e-12	7.10912e-13	0.000958435	0.985775	0.975996	0.0943939	0.793785	0.610028
C10090_1436	mmu_circ_0001914	mmu_circ_0001914	NA	NA	NA	9.40812	1.46368e-06	3.64344e-07	-0.407881	0.761939	0.561808	0.732139	0.25445	0.203784	0.264131	0.738932	0.491766	1.97909	1.87e-10	1.58325e-11	0.167258	0.869755	0.710082	1.53772	7.55006e-06	1.62622e-06	-0.365674	0.242896	0.106073	-0.185176	0.659976	0.431738
C10090_670	mmu_circ_0001920	mmu_circ_0001920	NA	NA	NA	8.79507	0.000165799	6.42714e-05	NA	NA	NA	8.2211	0.00494024	0.00296306	-0.707603	0.439781	0.205746	-8.79507	8.99367e-05	2.55724e-05	0.102176	0.969213	0.914558	-8.2211	0.00311406	0.00162404	NA	NA	NA	NA	NA	NA
C10090_10360	mmu_circ_0001921	mmu_circ_0001921	NA	NA	NA	9.56567	2.9531e-07	6.49646e-08	NA	NA	NA	8.89905	0.000211813	8.48184e-05	-0.478476	0.487844	0.241282	-9.56567	1.05751e-07	1.3983e-08	-0.276271	0.773649	0.55503	-8.89905	0.000107462	3.34892e-05	NA	NA	NA	NA	NA	NA
C10090_5725	mmu_circ_0001922	mmu_circ_0001922	NA	NA	NA	9.16717	1.19859e-05	3.63044e-06	NA	NA	NA	9.1472	4.20792e-05	1.43504e-05	0.215457	0.81705	0.61066	-9.16717	5.49322e-06	1.11824e-06	-0.717171	0.343251	0.14553	-9.1472	1.97944e-05	4.80906e-06	NA	NA	NA	NA	NA	NA
C10090_15680	mmu_circ_0001926	mmu_circ_0001926	-9.18859	2.64779e-05	1.05572e-06	-9.18859	5.60367e-07	1.29943e-07	NA	NA	NA	NA	NA	NA	NA	NA	NA	NA	NA	NA	NA	NA	NA	NA	NA	NA	NA	NA	NA	NA	NA	NA
C10090_8399	mmu_circ_0001928	mmu_circ_0001928	NA	NA	NA	9.02956	3.49682e-05	1.14599e-05	NA	NA	NA	9.98655	1.09869e-08	1.98949e-09	0.121707	0.911218	0.790082	0.129803	0.823769	0.77564	-1.77905	0.000977686	7.5348e-05	-0.19539	0.682735	0.606602	0.104607	0.918249	0.83215	-0.149292	0.846712	0.676252
C10090_14237	mmu_circ_0001930	mmu_circ_0001930	NA	NA	NA	NA	NA	NA	NA	NA	NA	NA	NA	NA	NA	NA	NA	NA	NA	NA	NA	NA	NA	NA	NA	NA	8.19377	0.00448011	0.00115653	NA	NA	NA
C10090_1049	mmu_circ_0001931	mmu_circ_0001931	NA	NA	NA	NA	NA	NA	NA	NA	NA	NA	NA	NA	NA	NA	NA	NA	NA	NA	NA	NA	NA	NA	NA	NA	8.45656	0.00193624	0.000298164	NA	NA	NA
C10090_15683	mmu_circ_0001932	mmu_circ_0001932	-0.242152	0.725255	0.539526	1.51325	2.26966e-06	5.82204e-07	-0.514808	0.486538	0.27251	1.62521	3.80033e-07	8.77128e-08	-0.513474	0.0629939	0.0173532	0.0579611	0.831017	0.784338	-0.206023	0.507855	0.26411	0.063142	0.814905	0.759104	-0.424298	0.146814	0.056867	0.21783	0.539552	0.310096
C10090_5978	mmu_circ_0001950	mmu_circ_0001950	NA	NA	NA	NA	NA	NA	NA	NA	NA	NA	NA	NA	NA	NA	NA	NA	NA	NA	NA	NA	NA	8.49586	0.000645576	0.000272902	NA	NA	NA	-8.49586	0.00197395	0.00030619
C10090_8503	mmu_circ_0001954	mmu_circ_0001954	0.32773	0.200891	0.0898822	-0.383228	0.0275274	0.0187941	-0.585659	0.027466	0.00829178	-1.17647	2.23788e-08	4.25418e-09	-0.0798029	0.885535	0.720616	-0.538941	0.0558233	0.036609	-0.103961	0.813994	0.618656	-0.00723195	0.986731	0.981292	-0.406486	0.3646	0.187295	-0.313085	0.456038	0.242532
C10090_15701	mmu_circ_0001955	mmu_circ_0001955	NA	NA	NA	8.02956	0.00564774	0.0035917	NA	NA	NA	NA	NA	NA	-8.02956	0.00368024	0.000716208	-8.02956	0.00372231	0.00204506	NA	NA	NA	NA	NA	NA	NA	NA	NA	NA	NA	NA
C10090_10241	mmu_circ_0001956	mmu_circ_0001956	-0.86071	0.00145744	0.000235562	-0.67659	0.000460774	0.000205566	-0.865295	0.0028925	0.000536006	-0.886351	5.59853e-05	1.93392e-05	-0.286263	0.487583	0.240954	0.0835905	0.78888	0.733086	-0.276431	0.492416	0.253304	0.160214	0.613534	0.534192	-0.290217	0.449065	0.251048	0.0570558	0.937767	0.871226
C10090_1256	mmu_circ_0001957	mmu_circ_0001957	-8.26256	0.00300565	0.000705366	0.351777	0.780079	0.738458	8.75087	0.000933267	0.00010361	8.2211	0.00491142	0.00296306	0.0135569	0.995112	0.985764	-8.61434	0.00027061	8.94268e-05	0.861045	0.309391	0.127104	-8.2211	0.00310271	0.00162404	NA	NA	NA	NA	NA	NA
C10090_10897	mmu_circ_0001958	mmu_circ_0001958	NA	NA	NA	NA	NA	NA	NA	NA	NA	NA	NA	NA	NA	NA	NA	8.37069	0.000531756	0.000205704	NA	NA	NA	9.03645	2.69351e-05	6.69238e-06	-8.37069	0.00229462	0.000404838	-0.0951073	0.924828	0.825194
C10090_6420	mmu_circ_0001963	mmu_circ_0001963	0.167888	0.8883	0.78371	-8.26256	0.000483951	0.000222858	NA	NA	NA	8.48422	0.00166449	0.000906406	8.43505	0.0010156	9.20818e-05	NA	NA	NA	-8.48422	0.000821208	6.05444e-05	0.873993	0.136204	0.0951436	NA	NA	NA	-9.35821	1.5681e-05	4.21414e-07
C10090_12802	mmu_circ_0001971	mmu_circ_0001971	-0.199576	0.73158	0.551866	0.318055	0.583287	0.524994	-0.352289	0.514724	0.296174	-0.484261	0.0545713	0.038386	-0.10297	0.865978	0.687902	-0.281592	0.392235	0.316892	-0.00342875	0.97469	0.92909	0.359568	0.270432	0.205246	0.0534334	0.947904	0.874024	0.0518897	0.954451	0.894376
C10090_1782	mmu_circ_0001978	mmu_circ_0001978	NA	NA	NA	NA	NA	NA	NA	NA	NA	NA	NA	NA	NA	NA	NA	NA	NA	NA	8.08215	0.00837078	0.00156122	8.84361	9.85332e-05	2.94952e-05	NA	NA	NA	-8.84361	0.000450085	3.40588e-05
C10090_10928	mmu_circ_0001979	mmu_circ_0001979	-1.1208	0.00301905	0.000618028	-0.207891	0.254219	0.204398	-0.450622	0.564165	0.340634	0.653743	0.134481	0.100838	-0.156399	0.786947	0.563092	-0.0393724	0.913295	0.88727	-0.425249	0.314168	0.129263	0.768565	0.00491408	0.00273884	0.630952	0.0511891	0.0164908	-0.290212	0.398507	0.198596
C10090_2955	mmu_circ_0001980	mmu_circ_0001980	-0.680087	0.342559	0.179209	-0.81802	0.074277	0.0537148	-0.581759	0.412389	0.213194	-9.91782	9.13661e-10	1.43733e-10	-8.51491	0.000670654	3.999e-05	0.303351	0.648767	0.571096	NA	NA	NA	NA	NA	NA	0.445711	0.58432	0.372618	9.1114	0.000165605	7.76884e-06
C10090_11671	mmu_circ_0001981	mmu_circ_0001981	NA	NA	NA	NA	NA	NA	NA	NA	NA	NA	NA	NA	NA	NA	NA	NA	NA	NA	7.94486	0.0125532	0.00283418	NA	NA	NA	NA	NA	NA	NA	NA	NA
C10090_15265	mmu_circ_0001987	mmu_circ_0001987	-0.0951466	0.939488	0.892476	-8.26256	0.000482446	0.000222858	NA	NA	NA	NA	NA	NA	8.43505	0.00100429	9.20818e-05	8.37069	0.000519371	0.000205704	NA	NA	NA	NA	NA	NA	0.408047	0.689368	0.491708	8.74886	0.000997711	0.000107015
C10090_13477	mmu_circ_0001989	mmu_circ_0001989	0.283269	0.532908	0.33526	0.984235	0.00244059	0.00136729	0.560271	0.168892	0.0652728	1.27062	0.000212427	8.41294e-05	-0.0644677	0.886368	0.757494	0.234495	0.341194	0.26985	0.138643	0.790138	0.576926	0.351913	0.152526	0.107645	0.0909316	0.823418	0.676782	0.00867298	0.995118	0.972128
C10090_13872	mmu_circ_0001990	mmu_circ_0001990	0.605276	0.345313	0.181019	0.467657	0.543579	0.48245	0.0557534	0.911653	0.806384	-0.680766	0.177183	0.136249	0.264131	0.738478	0.491766	1.86089	5.27129e-09	5.522e-10	0.415595	0.698403	0.45262	2.89621	2.37855e-15	1.03371e-16	-0.187793	0.613959	0.405004	-0.111457	0.763844	0.560368
C10090_4600	mmu_circ_0001993	mmu_circ_0001993	-0.542606	0.357102	0.189493	-0.185749	0.446766	0.383964	-0.166629	0.905406	0.796576	-0.395568	0.296392	0.240374	0.135883	0.879601	0.706986	0.249614	0.574305	0.494128	0.122139	0.922566	0.815242	0.765082	0.0770614	0.051053	0.00478605	0.998913	0.997262	-0.228158	0.710561	0.496488
C10090_11637	mmu_circ_0002009	mmu_circ_0002009	NA	NA	NA	9.35138	2.49757e-06	6.47328e-07	NA	NA	NA	NA	NA	NA	-1.02315	0.116075	0.0351758	-9.35138	1.03362e-06	1.70998e-07	8.43003	0.00231383	0.000260958	NA	NA	NA	NA	NA	NA	NA	NA	NA
C10090_15613	mmu_circ_0002010	mmu_circ_0002010	-8.40003	0.00190981	0.000342406	-8.40003	0.000237729	9.74236e-05	8.64422	0.00140142	0.000200036	NA	NA	NA	NA	NA	NA	8.61176	0.000145089	4.4526e-05	7.94486	0.0115983	0.00283418	8.35843	0.00118011	0.000572918	-0.280398	0.800227	0.63334	0.489879	0.659323	0.43271
C10090_13158	mmu_circ_0002012	mmu_circ_0002012	NA	NA	NA	NA	NA	NA	NA	NA	NA	NA	NA	NA	NA	NA	NA	NA	NA	NA	8.52982	0.00141912	0.00014375	NA	NA	NA	NA	NA	NA	NA	NA	NA
C10090_12072	mmu_circ_0002014	mmu_circ_0002014	NA	NA	NA	9.29255	4.22021e-06	1.1501e-06	NA	NA	NA	8.80607	0.000354888	0.000153355	-1.34302	0.0404782	0.0105473	-9.29255	1.80747e-06	3.19772e-07	0.460486	0.613109	0.36072	-8.80607	0.000186556	6.3952e-05	NA	NA	NA	NA	NA	NA
C10090_2879	mmu_circ_0002015	mmu_circ_0002015	0.904723	0.164974	0.0704132	0.182183	0.960787	0.953492	-0.944528	0.172985	0.0670474	-0.474299	0.237958	0.188901	-0.272659	0.816196	0.607022	0.203688	0.750655	0.6871	-1.27625	0.0609518	0.0175039	-0.377497	0.546046	0.463624	-0.0394868	0.971433	0.928528	-8.84361	0.000441827	3.40588e-05
C10090_9864	mmu_circ_0002016	mmu_circ_0002016	-0.284223	0.526203	0.328648	1.08389	3.95539e-05	1.33443e-05	-0.112282	0.931099	0.857782	0.428189	0.248318	0.198436	-0.501678	0.0259566	0.00646662	1.14157	8.16309e-14	4.38444e-15	-0.330834	0.308393	0.126243	1.71619	6.47535e-22	1.85324e-23	-0.178786	0.309089	0.147098	-0.14346	0.440682	0.230106
C10090_6627	mmu_circ_0002021	mmu_circ_0002021	NA	NA	NA	8.40812	0.00124086	0.00064042	NA	NA	NA	9.98655	1.09074e-08	1.98949e-09	0.307158	0.796579	0.574376	2.41023	3.87855e-09	3.99146e-10	-0.363769	0.519455	0.279256	1.23962	6.40655e-05	1.86071e-05	0.445748	0.174233	0.0702856	0.300181	0.406691	0.204592
C10090_1382	mmu_circ_0002022	mmu_circ_0002022	NA	NA	NA	8.79507	0.0001651	6.42714e-05	NA	NA	NA	9.48402	2.82245e-06	7.42718e-07	-0.36002	0.739892	0.49165	1.94926	6.2331e-07	9.99238e-08	-0.401868	0.572354	0.320126	1.33369	0.000243703	8.56604e-05	0.214876	0.628936	0.42038	-1.06901	0.00393452	0.000908964
C10090_12901	mmu_circ_0002023	mmu_circ_0002023	NA	NA	NA	10.167	8.24499e-11	1.17085e-11	NA	NA	NA	9.98655	1.0947e-08	1.98949e-09	-0.494793	0.3313	0.135646	1.13674	5.37335e-05	1.45404e-05	-0.276263	0.644586	0.39526	1.23962	6.41123e-05	1.86071e-05	0.46279	0.0747711	0.0254476	0.634062	0.0128348	0.00346438
C10090_13161	mmu_circ_0002030	mmu_circ_0002030	NA	NA	NA	9.4625	8.62959e-07	2.0507e-07	NA	NA	NA	9.94354	1.93247e-08	3.59708e-09	0.413247	0.510333	0.258762	0.875231	0.0208617	0.0127231	0.138609	0.880023	0.72986	0.340705	0.400434	0.32123	-1.559	0.00107596	0.000127316	-1.53538	0.00204476	0.000287288
C10090_14561	mmu_circ_0002032	mmu_circ_0002032	NA	NA	NA	NA	NA	NA	NA	NA	NA	NA	NA	NA	NA	NA	NA	NA	NA	NA	NA	NA	NA	NA	NA	NA	9.04166	0.000105521	5.10908e-06	NA	NA	NA
C10090_9379	mmu_circ_0002036	mmu_circ_0002036	-8.26256	0.0029954	0.000705366	0.968656	0.165716	0.127696	8.75087	0.000928613	0.00010361	NA	NA	NA	-0.603323	0.431089	0.199215	-0.734967	0.207859	0.153529	8.94457	0.000210298	7.29102e-06	8.73674	0.000188561	6.19208e-05	-8.49625	0.00146233	0.000199283	-0.473236	0.657262	0.42392
C10090_15768	mmu_circ_0002037	mmu_circ_0002037	-8.26256	0.00281318	0.000705366	1.02999	0.130052	0.0978392	8.8505	0.000555829	5.36652e-05	8.2211	0.00468584	0.00296306	-0.272405	0.764172	0.527914	-0.680789	0.230105	0.172225	0.986643	0.199551	0.0723934	0.902759	0.160961	0.114689	-0.280398	0.799989	0.63334	-9.12386	8.73419e-05	3.78852e-06
C10090_15716	mmu_circ_0002039	mmu_circ_0002039	0.315252	0.266548	0.129101	-2.95158	1.6751e-16	1.47469e-17	-0.638839	0.050202	0.0160495	-2.54999	5.40449e-15	5.11316e-16	0.422494	0.706361	0.447732	-8.29278	0.00123975	0.000584804	0.0954537	0.956666	0.886734	-8.9867	6.05581e-05	1.75371e-05	NA	NA	NA	NA	NA	NA
C10090_15765	mmu_circ_0002043	mmu_circ_0002043	9.36894	7.65209e-06	2.37528e-07	11.4625	2.43608e-26	1.23979e-27	-0.751611	0.231185	0.0970026	1.8008	1.17561e-09	1.90892e-10	0.345175	0.177964	0.0597818	-0.668411	0.00636432	0.00360358	0.0141947	0.98866	0.975858	-0.948815	8.75355e-05	2.57392e-05	0.616837	0.0333543	0.010241	-0.0698457	0.88019	0.749676
C10090_5016	mmu_circ_0002047	mmu_circ_0002047	0.936505	5.33619e-06	1.55645e-07	-2.20122	5.99015e-14	6.49046e-15	0.130264	0.448844	0.240158	-1.21123	9.67265e-10	1.53869e-10	1.01124	0.0187209	0.00454546	-9.23122	3.17059e-06	5.9798e-07	-0.67774	0.0290638	0.00769086	-1.46851	2.69716e-05	6.62712e-06	NA	NA	NA	-9.55995	2.48559e-06	4.68758e-08
C10090_11655	mmu_circ_0002051	mmu_circ_0002051	NA	NA	NA	8.16692	0.00349205	0.00202156	NA	NA	NA	NA	NA	NA	-8.16692	0.00269337	0.000348152	-8.16692	0.00220894	0.0010936	NA	NA	NA	NA	NA	NA	NA	NA	NA	NA	NA	NA
C10090_6786	mmu_circ_0002053	mmu_circ_0002053	8.16742	0.00473113	0.00133945	8.16692	0.00342765	0.00202156	-8.91767	0.00042532	3.52658e-05	-8.91767	3.41843e-05	1.13346e-05	-8.16692	0.00254843	0.000348152	0.329338	0.657781	0.58375	NA	NA	NA	NA	NA	NA	-8.49625	0.00137197	0.000199283	NA	NA	NA
C10090_14509	mmu_circ_0002054	mmu_circ_0002054	-0.163363	0.731436	0.551562	0.0300408	0.716139	0.666466	-0.44507	0.366463	0.178745	0.184674	0.781908	0.73735	0.110475	0.824483	0.625644	0.147245	0.61336	0.533138	-0.238414	0.509539	0.270626	-0.160912	0.603479	0.52096	0.174442	0.660322	0.458202	-0.11885	0.791736	0.60808
C10090_2116	mmu_circ_0002057	mmu_circ_0002057	0.904808	0.123536	0.0500162	-8.74786	2.54404e-05	8.13904e-06	-0.166844	0.911802	0.808546	-9.56986	8.72193e-08	1.80388e-08	8.43505	0.00107363	9.20818e-05	NA	NA	NA	7.94486	0.0128019	0.00283418	NA	NA	NA	NA	NA	NA	NA	NA	NA
C10090_2330	mmu_circ_0002059	mmu_circ_0002059	-0.188247	0.850303	0.731984	-8.94046	5.57318e-06	1.55541e-06	1.21191	0.0449706	0.0142144	-0.0736928	0.810425	0.769948	8.71528	0.000298524	1.24969e-05	8.23362	0.0010159	0.00044214	0.586134	0.557481	0.30715	1.07014	0.0660573	0.0431606	1.09752	0.117568	0.043512	-0.239239	0.769641	0.57714
C10090_11228	mmu_circ_0002060	mmu_circ_0002060	0.0156921	0.887861	0.780472	-1.56481	1.64371e-42	4.31756e-44	-0.0822932	0.931092	0.85389	-1.73432	1.09093e-38	3.3844e-40	-0.342895	0.113024	0.0340664	0.0370271	0.863604	0.827134	0.169553	0.622794	0.372922	0.869602	3.25749e-07	4.93078e-08	0.0764912	0.812869	0.657744	-0.201357	0.294772	0.130083
C10090_332	mmu_circ_0002061	mmu_circ_0002061	0.684011	0.00332036	0.000845862	-11.1501	4.33379e-26	2.23226e-27	0.195856	0.474111	0.261988	-11.2397	5.2862e-24	2.93096e-25	NA	NA	NA	NA	NA	NA	NA	NA	NA	NA	NA	NA	NA	NA	NA	NA	NA	NA
C10090_9914	mmu_circ_0002064	mmu_circ_0002064	-0.171175	0.786438	0.628182	-0.0266239	0.659847	0.606496	-0.0146918	0.942412	0.889182	-1.1331	0.0035091	0.00205296	0.209752	0.726987	0.474464	-0.288035	0.46905	0.390202	0.645423	0.308932	0.126592	0.933479	0.0364521	0.0228434	0.0895939	0.905856	0.814072	-0.969288	0.0574343	0.0179668
C10090_6277	mmu_circ_0002065	mmu_circ_0002065	NA	NA	NA	NA	NA	NA	NA	NA	NA	NA	NA	NA	NA	NA	NA	NA	NA	NA	7.94486	0.0118206	0.00283418	NA	NA	NA	NA	NA	NA	NA	NA	NA
C10090_12379	mmu_circ_0002068	mmu_circ_0002068	-0.0515014	0.93282	0.870166	-0.0265512	0.57122	0.510968	-0.701734	0.0512569	0.0164296	0.238894	0.597547	0.534308	0.498732	0.0712188	0.0200262	-0.895716	0.00355921	0.00185987	-0.38446	0.163632	0.0560478	-1.25326	1.12407e-05	2.4569e-06	0.416064	0.386995	0.201358	0.553572	0.194866	0.0755668
C10090_5646	mmu_circ_0002070	mmu_circ_0002070	0.368659	0.476941	0.283842	0.791673	0.0592778	0.0423204	-0.469398	0.463365	0.251924	-0.0987942	0.608086	0.54614	-0.207682	0.702037	0.443988	-1.77204	1.41472e-05	3.18152e-06	-0.138955	0.810642	0.61086	-1.18466	0.0071467	0.00408924	0.445711	0.583888	0.372618	0.0749481	0.964672	0.912368
C10090_4522	mmu_circ_0002073	mmu_circ_0002073	NA	NA	NA	NA	NA	NA	NA	NA	NA	NA	NA	NA	NA	NA	NA	8.61176	0.000146656	4.4526e-05	NA	NA	NA	8.35843	0.00120109	0.000572918	0.429897	0.634119	0.42654	1.10652	0.121884	0.042237
C10090_2660	mmu_circ_0002075	mmu_circ_0002075	NA	NA	NA	8.51491	0.000753864	0.000360456	NA	NA	NA	8.80607	0.000357069	0.000153355	-0.30205	0.809701	0.596404	-8.51491	0.000453699	0.000167231	-0.276245	0.782701	0.567082	-8.80607	0.000187484	6.3952e-05	NA	NA	NA	NA	NA	NA
C10090_881	mmu_circ_0002077	mmu_circ_0002077	NA	NA	NA	NA	NA	NA	NA	NA	NA	NA	NA	NA	NA	NA	NA	8.49625	0.000279046	9.57038e-05	NA	NA	NA	NA	NA	NA	0.545405	0.53035	0.321542	NA	NA	NA
C10090_13090	mmu_circ_0002081	mmu_circ_0002081	NA	NA	NA	9.35138	2.48576e-06	6.47328e-07	NA	NA	NA	8.80607	0.000353627	0.000153355	-0.723482	0.294421	0.115977	1.49081	2.1475e-05	5.18164e-06	0.0646067	0.975914	0.945136	1.47818	0.000987882	0.000431426	0.0739849	0.902519	0.790184	0.271877	0.648127	0.415278
C10090_7936	mmu_circ_0002082	mmu_circ_0002082	NA	NA	NA	10.1	2.46378e-10	3.69592e-11	NA	NA	NA	10.4538	7.06547e-12	9.01644e-13	0.0513919	0.950312	0.8723	1.66942	9.49569e-11	7.65028e-12	-1.13051	0.00485972	0.000863748	0.904482	0.00114108	0.00052881	0.350262	0.135928	0.0519442	-0.077032	0.852339	0.683358
C10090_6677	mmu_circ_0002088	mmu_circ_0002088	NA	NA	NA	NA	NA	NA	NA	NA	NA	NA	NA	NA	NA	NA	NA	8.61176	0.000145673	4.4526e-05	NA	NA	NA	NA	NA	NA	-8.61176	0.000865301	9.80974e-05	NA	NA	NA
C10090_14554	mmu_circ_0002089	mmu_circ_0002089	NA	NA	NA	NA	NA	NA	NA	NA	NA	NA	NA	NA	NA	NA	NA	8.37069	0.000520718	0.000205704	NA	NA	NA	NA	NA	NA	-8.37069	0.00218355	0.000404838	NA	NA	NA
C10090_2080	mmu_circ_0002093	mmu_circ_0002093	NA	NA	NA	NA	NA	NA	NA	NA	NA	NA	NA	NA	NA	NA	NA	9.55536	3.77993e-08	4.57962e-09	NA	NA	NA	9.28425	3.69648e-06	7.2331e-07	0.174435	0.82188	0.672024	0.61133	0.336907	0.157652
C10090_4255	mmu_circ_0002098	mmu_circ_0002098	NA	NA	NA	9.02956	3.45144e-05	1.14599e-05	-0.581703	0.57268	0.348962	-0.626134	0.23575	0.186888	0.505129	0.470791	0.228714	1.49664	0.000143369	4.28226e-05	-0.40207	0.716124	0.478762	2.66063	3.10252e-11	2.36126e-12	-0.332557	0.478048	0.273122	-1.11598	0.00108601	0.000118278
C10090_13959	mmu_circ_0002099	mmu_circ_0002099	0.428482	0.555834	0.356376	0.159413	0.979808	0.97639	-0.529432	0.587499	0.366492	0.525759	0.390951	0.328932	0.28275	0.748005	0.508344	1.98154	1.19812e-08	1.35335e-09	-0.183282	0.788223	0.575034	2.92375	5.54589e-36	9.64094e-38	0.0191798	0.971009	0.954038	-1.61855	1.73581e-16	7.77474e-19
C10090_12564	mmu_circ_0002107	mmu_circ_0002107	1.02808	0.0045496	0.00118579	-1.13368	0.00768864	0.00497166	-0.246961	0.77235	0.587966	-10.3199	8.63643e-13	1.02231e-13	0.405805	0.675515	0.414248	-8.61434	0.000265343	8.94268e-05	8.71012	0.000710373	4.36194e-05	NA	NA	NA	NA	NA	NA	NA	NA	NA
C10090_2653	mmu_circ_0002108	mmu_circ_0002108	1.72288	1.44753e-05	5.07428e-07	0.219529	0.885899	0.861356	-1.04134	0.0577899	0.0187648	-10.1548	1.92831e-11	2.5626e-12	-1.07989	0.0858522	0.0247546	-9.40812	5.93154e-07	9.14416e-08	8.71012	0.000720171	4.36194e-05	NA	NA	NA	NA	NA	NA	NA	NA	NA
C10090_13325	mmu_circ_0002109	mmu_circ_0002109	-0.160741	0.78722	0.625858	-10.4324	6.35262e-16	5.89244e-17	-0.681291	0.200846	0.0809194	-10.4323	8.69507e-14	9.12552e-15	NA	NA	NA	8.7187	7.4302e-05	2.07156e-05	NA	NA	NA	NA	NA	NA	-8.7187	0.000533822	4.82886e-05	NA	NA	NA
C10090_11634	mmu_circ_0002110	mmu_circ_0002110	0.523671	0.263477	0.127261	-9.74803	4.92941e-10	7.5767e-11	-0.0412062	0.9827	0.95481	-10.1548	1.92513e-11	2.5626e-12	NA	NA	NA	NA	NA	NA	NA	NA	NA	NA	NA	NA	NA	NA	NA	NA	NA	NA
C10090_480	mmu_circ_0002119	mmu_circ_0002119	-0.716828	0.32888	0.169941	-9.26256	2.62382e-07	5.68054e-08	-9.28031	5.5639e-05	1.90417e-06	-9.28031	1.76406e-06	4.52174e-07	NA	NA	NA	NA	NA	NA	NA	NA	NA	NA	NA	NA	NA	NA	NA	NA	NA	NA
C10090_4867	mmu_circ_0002127	mmu_circ_0002127	NA	NA	NA	NA	NA	NA	NA	NA	NA	8.35843	0.00285381	0.00163882	8.08746	0.00401762	0.000678492	NA	NA	NA	-8.35843	0.00149057	0.000134799	-8.35843	0.00169122	0.000850448	NA	NA	NA	NA	NA	NA
C10090_11283	mmu_circ_0002128	mmu_circ_0002128	NA	NA	NA	9.40812	1.45172e-06	3.64344e-07	NA	NA	NA	8.48422	0.00170091	0.000906406	-0.692842	0.307177	0.122632	-9.40812	5.88459e-07	9.14416e-08	0.839061	0.263705	0.103103	-8.48422	0.00100177	0.000445348	8.95913	0.000181292	1.00622e-05	9.02873	0.000251941	1.49668e-05
C10090_10519	mmu_circ_0002132	mmu_circ_0002132	NA	NA	NA	NA	NA	NA	NA	NA	NA	NA	NA	NA	NA	NA	NA	NA	NA	NA	8.43003	0.00236641	0.000260958	NA	NA	NA	NA	NA	NA	NA	NA	NA
C10090_13009	mmu_circ_0002133	mmu_circ_0002133	NA	NA	NA	NA	NA	NA	NA	NA	NA	NA	NA	NA	NA	NA	NA	NA	NA	NA	8.08215	0.00793535	0.00156122	NA	NA	NA	NA	NA	NA	NA	NA	NA
C10090_7068	mmu_circ_0002135	mmu_circ_0002135	0.401638	0.0963759	0.037395	0.0300648	0.668065	0.614872	0.0615513	0.720953	0.518348	-0.677563	0.000674385	0.000329996	-0.768667	0.00332679	0.000518346	-0.878573	0.000575709	0.000229906	0.358337	0.27585	0.109464	0.0790936	0.795912	0.736856	0.0691848	0.910145	0.821366	-0.640927	0.0417625	0.0126016
C10090_13141	mmu_circ_0002136	mmu_circ_0002136	0.412974	0.269924	0.131242	-0.298525	0.202535	0.159767	0.429437	0.203427	0.0821294	-0.882537	0.00787504	0.0050629	-0.336251	0.557911	0.302254	-0.578557	0.152955	0.109402	0.922858	0.021245	0.00542218	-0.0327796	0.958028	0.942186	0.174435	0.821643	0.672024	-0.287717	0.703048	0.482786
C10090_255	mmu_circ_0002137	mmu_circ_0002137	NA	NA	NA	NA	NA	NA	8.40301	0.00345783	0.000745636	NA	NA	NA	NA	NA	NA	NA	NA	NA	NA	NA	NA	NA	NA	NA	NA	NA	NA	NA	NA	NA
C10090_15432	mmu_circ_0002138	mmu_circ_0002138	0.0623097	0.827891	0.675694	-0.397343	0.0062701	0.00401966	-0.00140272	0.848988	0.715522	-0.495064	0.00195509	0.001081	-0.143456	0.708402	0.452498	-0.279126	0.233775	0.175211	0.0480447	0.954607	0.875056	-0.0217734	0.937807	0.912756	0.257692	0.432858	0.23708	-0.152141	0.643652	0.409376
C10090_10501	mmu_circ_0002139	mmu_circ_0002139	NA	NA	NA	NA	NA	NA	NA	NA	NA	NA	NA	NA	8.43505	0.00107108	9.20818e-05	NA	NA	NA	NA	NA	NA	NA	NA	NA	NA	NA	NA	NA	NA	NA
C10090_3951	mmu_circ_0002140	mmu_circ_0002140	-0.283963	0.34681	0.182918	-0.437369	0.0084816	0.005514	-0.454716	0.160648	0.0615058	-0.466044	0.0104926	0.00681268	-0.474105	0.122605	0.03753	-0.734707	0.00629349	0.00355702	-0.0353726	0.910383	0.791166	-0.256161	0.350565	0.274908	0.732845	0.0173119	0.00496786	-0.379713	0.298328	0.132074
C10090_3320	mmu_circ_0002141	mmu_circ_0002141	0.127186	0.684394	0.493196	-0.203247	0.138865	0.105011	-0.16673	0.797062	0.620972	-0.72144	0.000745213	0.000366786	-0.966641	0.000821995	5.90856e-05	-0.201437	0.436809	0.36159	0.447381	0.163772	0.0559932	0.0235417	0.947278	0.924384	-0.0396687	0.92988	0.849718	-0.00331903	0.977875	0.939378
C10090_12769	mmu_circ_0002142	mmu_circ_0002142	-0.210724	0.787183	0.624986	0.276106	0.756953	0.713304	-0.308644	0.713673	0.506362	-0.353296	0.275014	0.221524	-1.04148	0.0352778	0.00904818	-0.482029	0.274205	0.209336	-1.32702	0.0125843	0.00312504	-0.0203164	0.973713	0.964424	-0.393386	0.593649	0.383334	-0.335861	0.635101	0.401392
C10090_5131	mmu_circ_0002143	mmu_circ_0002143	-8.40003	0.00202144	0.000342406	-0.233109	0.598382	0.540668	-0.488716	0.662459	0.448828	-0.11831	0.719046	0.666838	-8.16692	0.00261087	0.000348152	0.831956	0.185657	0.135722	-8.89905	9.2166e-05	2.46392e-06	-8.89905	0.000106376	3.34892e-05	-0.319744	0.729948	0.536858	8.40088	0.00346412	0.000765178
C10090_14515	mmu_circ_0002144	mmu_circ_0002144	-8.94046	0.000146766	9.22932e-06	0.522042	0.470783	0.40731	-0.166573	0.909943	0.81272	-0.515938	0.239146	0.19058	-0.834604	0.18936	0.064538	-0.46363	0.377549	0.30433	-8.9867	5.40683e-05	1.10666e-06	0.29755	0.614117	0.536522	-0.220138	0.813498	0.662096	-0.642555	0.408474	0.205874
C10090_14338	mmu_circ_0002145	mmu_circ_0002145	-0.095332	0.940203	0.88762	0.114886	0.959686	0.951218	-0.389021	0.763789	0.56721	-0.433452	0.407857	0.346028	-8.51491	0.000623666	3.999e-05	0.0968513	0.886603	0.854796	-8.48422	0.000823541	6.05444e-05	-8.48422	0.00098118	0.000445348	-0.0396308	0.969576	0.935226	NA	NA	NA
C10090_212	mmu_circ_0002147	mmu_circ_0002147	-0.204892	0.732463	0.550768	-1.26861	0.000499046	0.000232062	-0.318695	0.712073	0.504038	-1.03053	0.0132662	0.008704	0.0576343	0.955691	0.903584	0.881829	0.047573	0.0307498	0.845562	0.144998	0.048272	0.750045	0.134887	0.094138	-0.28477	0.646477	0.444014	-0.271786	0.705568	0.487178
C10090_15079	mmu_circ_0002154	mmu_circ_0002154	NA	NA	NA	9.51491	5.02638e-07	1.15422e-07	NA	NA	NA	9.35865	8.26598e-06	2.42796e-06	0.636486	0.189827	0.064891	-9.51491	1.85666e-07	2.61486e-08	0.170975	0.874602	0.722076	-0.862796	0.148688	0.104526	NA	NA	NA	-8.49586	0.00194731	0.00030619
C10090_9617	mmu_circ_0002158	mmu_circ_0002158	-0.0951572	0.934297	0.870044	-0.554589	0.265953	0.215142	0.195811	0.800034	0.625736	-8.91767	3.47844e-05	1.13346e-05	-8.29278	0.00170526	0.000169237	-8.29278	0.00128268	0.000584804	8.32328	0.00333564	0.000473734	8.49586	0.000662862	0.000272902	NA	NA	NA	-8.49586	0.00210854	0.00030619
C10090_6745	mmu_circ_0002161	mmu_circ_0002161	0.461064	0.499677	0.303256	4.24929	3.01986e-70	4.0901e-72	0.0676612	0.90304	0.792484	3.75105	3.06313e-46	7.7505e-48	-0.382924	0.00328742	0.00051154	-1.81145	5.31156e-32	8.2755e-34	-0.0501212	0.783263	0.568798	-1.42084	1.884e-16	7.62868e-18	-0.0243781	0.956479	0.887578	-0.704157	0.00996772	0.00265054
C10090_13691	mmu_circ_0002162	mmu_circ_0002162	NA	NA	NA	11.5903	9.0926e-29	3.95574e-30	NA	NA	NA	11.3586	4.16747e-22	2.56742e-23	-0.470605	0.0686248	0.0192407	-1.50891	2.87068e-08	3.39562e-09	-0.121147	0.737862	0.506548	-1.41535	4.25666e-06	8.53678e-07	-0.454729	0.399644	0.211432	-0.679978	0.232057	0.0938184
C10090_4525	mmu_circ_0002163	mmu_circ_0002163	0.145711	0.901911	0.80127	3.98708	2.61145e-36	8.84238e-38	0.220326	0.78313	0.60576	3.61964	1.96528e-31	7.39414e-33	-0.197092	0.393293	0.17452	-1.72079	2.30679e-16	9.55252e-18	-0.522364	0.00348961	0.000548076	-1.46345	3.11639e-12	2.08112e-13	0.182701	0.704182	0.509426	-0.703813	0.044367	0.0135025
C10090_3381	mmu_circ_0002164	mmu_circ_0002164	NA	NA	NA	10.2312	2.7058e-11	3.70916e-12	NA	NA	NA	8.9867	0.000125642	4.69118e-05	-0.28154	0.628568	0.36659	-10.2312	5.01822e-12	3.34342e-13	-0.0421297	0.95713	0.883766	-8.9867	6.14123e-05	1.75371e-05	NA	NA	NA	NA	NA	NA
C10090_13926	mmu_circ_0002169	mmu_circ_0002169	-8.94046	0.000149956	9.22932e-06	-8.94046	5.51639e-06	1.55541e-06	NA	NA	NA	NA	NA	NA	NA	NA	NA	NA	NA	NA	NA	NA	NA	NA	NA	NA	NA	NA	NA	NA	NA	NA
C10090_13043	mmu_circ_0002170	mmu_circ_0002170	NA	NA	NA	13.3113	9.09899e-96	8.96268e-98	9.75104	8.86768e-07	1.03629e-08	12.9271	4.8887e-66	8.17472e-68	0.0913075	0.628353	0.366336	-1.52944	7.19169e-26	1.41534e-27	0.314093	0.036664	0.00995472	-1.33614	7.79309e-15	3.61816e-16	-0.500634	0.0428718	0.0134974	-0.190088	0.568044	0.336916
C10090_14700	mmu_circ_0002171	mmu_circ_0002171	NA	NA	NA	NA	NA	NA	NA	NA	NA	NA	NA	NA	7.94953	0.00591533	0.00132029	NA	NA	NA	8.2075	0.00490785	0.000860002	NA	NA	NA	NA	NA	NA	NA	NA	NA
C10090_7788	mmu_circ_0002172	mmu_circ_0002172	NA	NA	NA	NA	NA	NA	NA	NA	NA	NA	NA	NA	7.94953	0.00580903	0.00132029	NA	NA	NA	8.32328	0.00305693	0.000473734	NA	NA	NA	NA	NA	NA	NA	NA	NA
C10090_291	mmu_circ_0002173	mmu_circ_0002173	NA	NA	NA	NA	NA	NA	NA	NA	NA	NA	NA	NA	8.08746	0.00428167	0.000678492	NA	NA	NA	8.62278	0.00101646	7.91852e-05	NA	NA	NA	NA	NA	NA	NA	NA	NA
C10090_5693	mmu_circ_0002179	mmu_circ_0002179	-0.173174	0.85115	0.731802	1.04263	0.0268806	0.0183359	-0.788116	0.335454	0.157927	1.05178	0.0165424	0.0109591	0.0112384	0.991785	0.97376	-0.232349	0.559303	0.479042	-0.217449	0.665203	0.414432	0.0440431	0.910638	0.879942	0.29919	0.589403	0.377808	0.0279618	0.993437	0.970252
C10090_14163	mmu_circ_0002181	mmu_circ_0002181	0.0749546	0.935013	0.86996	0.290761	0.795749	0.758354	0.695759	0.345005	0.163287	0.721545	0.311535	0.2543	0.605934	0.290565	0.113864	0.380726	0.434699	0.358506	0.616691	0.309124	0.1268	-0.3483	0.570113	0.48575	-0.280806	0.693809	0.496678	1.12756	0.0351046	0.0103526
C10090_10816	mmu_circ_0002192	mmu_circ_0002192	-0.0211707	0.98848	0.9779	-9.18859	5.62357e-07	1.29943e-07	-1.02932	0.183037	0.0717072	-9.43233	3.89819e-07	9.03144e-08	NA	NA	NA	NA	NA	NA	NA	NA	NA	NA	NA	NA	NA	NA	NA	NA	NA	NA
C10090_517	mmu_circ_0002193	mmu_circ_0002193	NA	NA	NA	NA	NA	NA	NA	NA	NA	NA	NA	NA	NA	NA	NA	8.23362	0.00102605	0.00044214	NA	NA	NA	NA	NA	NA	-8.23362	0.00380146	0.000822422	NA	NA	NA
C10090_7426	mmu_circ_0002195	mmu_circ_0002195	9.09329	6.59409e-05	3.38792e-06	11.337	3.81984e-24	2.18702e-25	0.446083	0.474495	0.262596	1.89103	1.33443e-06	3.3148e-07	-0.0944932	0.826533	0.643572	-1.56745	1.901e-07	2.6851e-08	-0.0568723	0.883788	0.737782	-1.66042	2.59437e-06	4.87854e-07	0.656862	0.141416	0.0545088	0.8347	0.0986333	0.0331568
C10090_14526	mmu_circ_0002196	mmu_circ_0002196	1.03022	0.111284	0.0442216	3.14049	1.18559e-16	1.01455e-17	0.629685	0.227253	0.094847	1.98364	3.89882e-08	7.6947e-09	-0.198496	0.565328	0.308004	-1.30714	1.08982e-06	1.82754e-07	-0.104626	0.775575	0.558518	-1.78212	5.76525e-08	7.52892e-09	0.223385	0.681633	0.483132	0.936004	0.0359486	0.0106524
C10090_5980	mmu_circ_0002197	mmu_circ_0002197	8.75221	0.000444784	4.83228e-05	8.79507	0.000162614	6.42714e-05	NA	NA	NA	8.59954	0.000980421	0.00050132	0.417552	0.630393	0.368298	-8.79507	8.79085e-05	2.55724e-05	0.193249	0.897971	0.76125	-0.24111	0.76758	0.706232	8.33136	0.00283503	0.000587228	-0.0949275	0.933961	0.859544
C10090_12167	mmu_circ_0002198	mmu_circ_0002198	0.320048	0.703434	0.511246	0.383851	0.673361	0.621266	0.592119	0.392677	0.19754	0.843206	0.165801	0.126804	-0.0186032	0.985676	0.960516	0.265233	0.610187	0.529504	-0.861309	0.131671	0.0430652	-0.295887	0.580005	0.495654	0.130167	0.890683	0.76173	0.390484	0.611612	0.381212
C10090_13316	mmu_circ_0002201	mmu_circ_0002201	-0.46826	0.0254514	0.00832944	-0.288823	0.0154216	0.0102378	-0.360993	0.258908	0.11166	-0.692136	0.000152474	5.9849e-05	0.0731249	0.836784	0.653946	0.365316	0.0383091	0.0242436	0.691544	0.00215522	0.000230466	0.244103	0.316974	0.245542	-0.87921	3.28192e-05	1.06194e-06	0.148311	0.715814	0.50404
C10090_6496	mmu_circ_0002207	mmu_circ_0002207	NA	NA	NA	8.02956	0.00568627	0.0035917	0.0965252	0.908633	0.809022	-8.43212	0.000588039	0.000284122	0.598335	0.570471	0.312204	-8.02956	0.0037503	0.00204506	8.32328	0.00307766	0.000473734	NA	NA	NA	NA	NA	NA	NA	NA	NA
C10090_13177	mmu_circ_0002208	mmu_circ_0002208	0.31963	0.667069	0.469822	0.80646	0.138011	0.104252	0.500577	0.40886	0.210232	0.0231499	0.888803	0.861816	-0.382382	0.532582	0.28081	-9.91707	9.98035e-10	9.35018e-11	-0.0133573	0.973139	0.927206	-9.2211	1.12277e-05	2.51832e-06	8.19377	0.00455937	0.00115653	NA	NA	NA
C10090_10138	mmu_circ_0002210	mmu_circ_0002210	0.173868	0.736469	0.55851	1.33957	6.69943e-06	1.90411e-06	-0.327241	0.656098	0.437946	1.60692	4.40206e-09	7.69028e-10	0.13897	0.706578	0.44989	-0.261845	0.265315	0.201896	-0.011556	0.942777	0.854564	-0.14754	0.511128	0.4278	0.388181	0.163201	0.0649102	-0.501309	0.0441409	0.0134233
C10090_5749	mmu_circ_0002211	mmu_circ_0002211	-0.311345	0.265975	0.128753	-0.849648	1.14451e-05	3.36096e-06	0.632982	0.0146679	0.00424856	0.24332	0.638178	0.578362	0.0312415	0.955418	0.896692	-0.217627	0.470704	0.391674	0.0991567	0.877253	0.724998	-0.612835	0.0389631	0.0245326	-0.119063	0.811808	0.653626	0.278538	0.59867	0.366936
C10090_7989	mmu_circ_0002213	mmu_circ_0002213	NA	NA	NA	NA	NA	NA	NA	NA	NA	NA	NA	NA	7.94953	0.00579861	0.00132029	NA	NA	NA	NA	NA	NA	NA	NA	NA	NA	NA	NA	8.40088	0.00334283	0.000765178
C10090_8033	mmu_circ_0002216	mmu_circ_0002216	-8.52552	0.00109742	0.000166213	-8.52552	0.00011134	4.25894e-05	NA	NA	NA	NA	NA	NA	NA	NA	NA	NA	NA	NA	8.08215	0.00753539	0.00156122	8.35843	0.001176	0.000572918	8.33136	0.00276258	0.000587228	0.042448	0.994638	0.974942
C10090_10572	mmu_circ_0002217	mmu_circ_0002217	NA	NA	NA	NA	NA	NA	NA	NA	NA	NA	NA	NA	NA	NA	NA	NA	NA	NA	NA	NA	NA	8.73674	0.000187471	6.19208e-05	NA	NA	NA	-8.73674	0.000745445	7.0819e-05
C10090_9315	mmu_circ_0002226	mmu_circ_0002226	-0.220675	0.73025	0.546564	-1.8177	3.67493e-05	1.23604e-05	-0.545249	0.351173	0.168453	-2.03732	6.44007e-06	1.82504e-06	-8.29278	0.0017123	0.000169237	-8.29278	0.00128383	0.000584804	0.434359	0.713208	0.471152	-8.35843	0.00171875	0.000850448	NA	NA	NA	NA	NA	NA
C10090_13798	mmu_circ_0002227	mmu_circ_0002227	-1.13277	0.0142136	0.0043892	-1.2704	0.000696093	0.000326548	0.0557534	0.91194	0.806384	-0.381252	0.393135	0.331116	-0.627424	0.470814	0.228148	-8.95565	2.93591e-05	7.3127e-06	-0.691552	0.417589	0.195189	-0.162315	0.828207	0.775358	NA	NA	NA	-8.73674	0.00072215	7.0819e-05
C10090_13000	mmu_circ_0002236	mmu_circ_0002236	0.226693	0.832671	0.6816	1.42998	0.00697127	0.0044849	NA	NA	NA	10.3254	6.77906e-11	9.63536e-12	0.195893	0.776817	0.541408	-1.2368	0.00755784	0.0043243	0.155271	0.828311	0.647356	-1.38232	0.00160448	0.000787784	0.475068	0.567439	0.356492	0.390502	0.673897	0.45133
C10090_9330	mmu_circ_0002240	mmu_circ_0002240	NA	NA	NA	9.4625	8.69718e-07	2.0507e-07	NA	NA	NA	8.9867	0.000126838	4.69118e-05	-0.311232	0.705966	0.447914	-1.09181	0.0471854	0.0304316	0.54293	0.473357	0.237766	-0.249955	0.719692	0.651186	0.201444	0.879366	0.74852	-0.0950496	0.932385	0.841388
C10090_448	mmu_circ_0002243	mmu_circ_0002243	NA	NA	NA	9.29255	4.25223e-06	1.1501e-06	NA	NA	NA	9.94354	1.94165e-08	3.59708e-09	0.142493	0.889925	0.72964	-9.29255	1.82652e-06	3.19772e-07	-0.276429	0.652703	0.402146	-9.94354	5.19673e-09	5.60766e-10	8.45656	0.00195725	0.000298164	8.74886	0.0010484	0.000107015
C10090_3679	mmu_circ_0002246	mmu_circ_0002246	NA	NA	NA	11.0296	1.68347e-19	1.20914e-20	NA	NA	NA	11.2211	4.25749e-20	2.932e-21	-0.471047	0.164052	0.0539358	0.203817	0.453373	0.37651	-0.575986	0.0475427	0.0132857	-0.599784	0.034826	0.0217432	0.671819	0.00416807	0.000988366	0.548856	0.127317	0.0445398
C10090_3741	mmu_circ_0002250	mmu_circ_0002250	NA	NA	NA	9.40812	1.4458e-06	3.64344e-07	NA	NA	NA	9.06905	7.24803e-05	2.59462e-05	-0.195499	0.825778	0.631854	-0.248751	0.65138	0.5762	-0.639013	0.419154	0.198634	-0.447728	0.499666	0.416088	0.104607	0.917293	0.83215	0.77956	0.311244	0.140948
C10090_1321	mmu_circ_0002255	mmu_circ_0002255	NA	NA	NA	8.40812	0.00126809	0.00064042	NA	NA	NA	NA	NA	NA	-8.40812	0.00110676	8.22666e-05	-8.40812	0.000765802	0.000312726	NA	NA	NA	NA	NA	NA	NA	NA	NA	8.5263	0.00239665	0.000397182
C10090_9424	mmu_circ_0002256	mmu_circ_0002256	NA	NA	NA	8.87744	9.98187e-05	3.61748e-05	NA	NA	NA	8.89905	0.000212631	8.48184e-05	-0.442392	0.655075	0.391948	0.619017	0.227006	0.169673	-8.89905	9.66988e-05	2.46392e-06	-8.89905	0.000107828	3.34892e-05	-0.165313	0.834242	0.690604	8.94134	0.000423228	2.88338e-05
C10090_2891	mmu_circ_0002257	mmu_circ_0002257	NA	NA	NA	NA	NA	NA	NA	NA	NA	NA	NA	NA	NA	NA	NA	8.91139	1.90532e-05	4.48402e-06	NA	NA	NA	10.1657	6.42564e-11	5.08112e-12	-0.0394868	0.971193	0.928528	-1.13693	0.0201949	0.00560812
C10090_12065	mmu_circ_0002258	mmu_circ_0002258	NA	NA	NA	NA	NA	NA	NA	NA	NA	NA	NA	NA	NA	NA	NA	8.99887	9.7944e-06	2.08618e-06	NA	NA	NA	9.12386	1.38207e-05	3.18782e-06	-0.220138	0.813971	0.662096	-0.0951278	0.922576	0.82014
C10090_14689	mmu_circ_0002260	mmu_circ_0002260	NA	NA	NA	NA	NA	NA	NA	NA	NA	NA	NA	NA	NA	NA	NA	8.7187	7.41929e-05	2.07156e-05	NA	NA	NA	8.49586	0.000642996	0.000272902	-0.524932	0.590534	0.380486	-0.0949756	0.935488	0.85323
C10090_7792	mmu_circ_0002261	mmu_circ_0002261	NA	NA	NA	11.502	4.62328e-27	2.2106e-28	NA	NA	NA	11.239	2.40077e-20	1.62164e-21	-0.516692	0.0500455	0.0134286	-0.114827	0.649196	0.571074	-0.349422	0.274498	0.108469	-0.395316	0.160937	0.114706	0.550642	0.0185918	0.0053615	0.79814	0.00378714	0.000871346
C10090_15883	mmu_circ_0002262	mmu_circ_0002262	NA	NA	NA	NA	NA	NA	-8.43212	0.0031132	0.000653132	-8.43212	0.000585109	0.000284122	NA	NA	NA	8.81826	3.72829e-05	9.63792e-06	NA	NA	NA	8.49586	0.000639165	0.000272902	-0.139134	0.901624	0.788974	0.0304486	0.993299	0.988382
C10090_8404	mmu_circ_0002263	mmu_circ_0002263	NA	NA	NA	NA	NA	NA	NA	NA	NA	NA	NA	NA	NA	NA	NA	9.76951	2.15363e-09	2.14568e-10	NA	NA	NA	9.73674	3.22861e-08	4.02464e-09	-0.312742	0.634067	0.427104	-0.210437	0.766157	0.579946
C10090_10175	mmu_circ_0002265	mmu_circ_0002265	NA	NA	NA	NA	NA	NA	NA	NA	NA	NA	NA	NA	NA	NA	NA	8.23362	0.00101734	0.00044214	NA	NA	NA	NA	NA	NA	0.22294	0.86665	0.733398	NA	NA	NA
C10090_2083	mmu_circ_0002266	mmu_circ_0002266	9.16742	4.1233e-05	1.74333e-06	9.02956	3.47506e-05	1.14599e-05	0.113548	0.869531	0.745416	-8.91767	3.46674e-05	1.13346e-05	-9.02956	3.11296e-05	5.2762e-07	2.5401	1.0484e-15	4.70686e-17	8.08215	0.00835207	0.00156122	11.2063	2.19734e-22	6.149e-24	-0.190125	0.559977	0.349688	-0.48356	0.147276	0.0528762
C10090_11316	mmu_circ_0002267	mmu_circ_0002267	NA	NA	NA	11.117	1.00248e-20	6.82994e-22	NA	NA	NA	11.6936	6.74565e-28	3.1168e-29	-0.114179	0.816245	0.606058	0.0982359	0.736412	0.668628	-0.627889	0.00805557	0.00167404	-1.44778	1.27349e-07	1.79266e-08	0.411438	0.146334	0.0566466	1.18743	0.00024163	1.50948e-05
C10090_5607	mmu_circ_0002268	mmu_circ_0002268	NA	NA	NA	10.8162	8.00237e-17	6.73296e-18	NA	NA	NA	10.543	1.26985e-12	1.52549e-13	-0.355523	0.382475	0.168001	0.52155	0.0403124	0.0256188	0.056974	0.963294	0.897304	1.13715	1.2446e-05	2.8206e-06	0.177917	0.624687	0.41695	-0.32941	0.252445	0.105037
C10090_15057	mmu_circ_0002269	mmu_circ_0002269	NA	NA	NA	9.56567	2.91772e-07	6.49646e-08	NA	NA	NA	9.7065	3.0315e-07	6.9501e-08	0.106575	0.904662	0.777932	1.53558	1.87834e-06	3.38086e-07	0.201596	0.813926	0.621154	1.68738	7.82738e-08	1.04874e-08	-0.529027	0.111116	0.0405728	-0.61958	0.0346765	0.01021
C10090_4430	mmu_circ_0002274	mmu_circ_0002274	0.167888	0.89046	0.78371	-8.26256	0.000487646	0.000222858	NA	NA	NA	NA	NA	NA	NA	NA	NA	NA	NA	NA	NA	NA	NA	NA	NA	NA	NA	NA	NA	NA	NA	NA
C10090_14712	mmu_circ_0002282	mmu_circ_0002282	NA	NA	NA	NA	NA	NA	NA	NA	NA	NA	NA	NA	NA	NA	NA	NA	NA	NA	NA	NA	NA	NA	NA	NA	8.77873	0.000459036	3.903e-05	8.74886	0.00100656	0.000107015
C10090_15877	mmu_circ_0002289	mmu_circ_0002289	NA	NA	NA	NA	NA	NA	NA	NA	NA	NA	NA	NA	NA	NA	NA	8.49625	0.00027142	9.57038e-05	NA	NA	NA	NA	NA	NA	-8.49625	0.00136091	0.000199283	NA	NA	NA
C10090_12481	mmu_circ_0002294	mmu_circ_0002294	NA	NA	NA	NA	NA	NA	NA	NA	NA	8.35843	0.00286589	0.00163882	NA	NA	NA	9.37091	3.17351e-07	4.54752e-08	-8.35843	0.00150097	0.000134799	0.84785	0.171877	0.123379	-0.592171	0.406983	0.21791	-0.177547	0.853207	0.691496
C10090_5506	mmu_circ_0002295	mmu_circ_0002295	-0.818614	0.0110617	0.00334486	-0.316595	0.0917704	0.0672694	-0.166781	0.882367	0.76133	0.303314	0.58934	0.526192	-0.0584405	0.923853	0.811036	1.20385	7.39096e-08	9.46976e-09	-0.0623426	0.898407	0.764246	1.38811	1.87631e-08	2.2713e-09	-0.566638	0.0112155	0.00312308	-0.00107177	0.971697	0.927258
C10090_8463	mmu_circ_0002296	mmu_circ_0002296	-0.597777	0.145996	0.0607892	-0.261561	0.212438	0.168625	-0.166856	0.902487	0.792752	-0.388197	0.293628	0.23781	-0.401811	0.416314	0.188816	1.80791	2.33574e-15	1.08216e-16	0.981382	0.0228458	0.00585936	2.35509	7.51455e-15	3.45698e-16	-0.546161	0.0084226	0.00231552	0.0462145	0.940232	0.874846
C10090_2830	mmu_circ_0002299	mmu_circ_0002299	8.43045	0.00183825	0.000354664	NA	NA	NA	NA	NA	NA	NA	NA	NA	NA	NA	NA	NA	NA	NA	NA	NA	NA	NA	NA	NA	NA	NA	NA	NA	NA	NA
C10090_3362	mmu_circ_0002305	mmu_circ_0002305	-0.635767	0.46361	0.271442	1.89646	4.09969e-06	1.10632e-06	-0.529432	0.586975	0.366492	1.04511	0.0250112	0.0168777	-0.100601	0.857492	0.678884	-1.53314	1.9047e-05	4.45914e-06	0.384786	0.418456	0.195157	-1.04117	0.0122817	0.00723048	-0.731649	0.309954	0.147949	-0.535382	0.502139	0.279834
C10090_11099	mmu_circ_0002310	mmu_circ_0002310	8.16742	0.00470887	0.00133945	NA	NA	NA	NA	NA	NA	NA	NA	NA	NA	NA	NA	NA	NA	NA	NA	NA	NA	NA	NA	NA	NA	NA	NA	NA	NA	NA
C10090_8111	mmu_circ_0002316	mmu_circ_0002316	0.58828	0.144308	0.0600478	0.00809189	0.750159	0.705054	0.465512	0.401357	0.204252	-0.626267	0.181726	0.140023	-0.507251	0.356074	0.151024	-9.99308	3.06887e-10	2.67378e-11	0.816718	0.207122	0.075789	-8.80607	0.000188893	6.3952e-05	NA	NA	NA	NA	NA	NA
C10090_3710	mmu_circ_0002318	mmu_circ_0002318	0.70086	6.28646e-15	5.04666e-17	1.93258	7.16595e-153	3.5293e-155	0.0700999	0.2246	0.0933644	1.47551	1.63408e-106	1.25837e-108	0.43165	7.14176e-22	1.16672e-24	-0.414394	8.1866e-15	3.99428e-16	-0.0240341	0.592918	0.338934	-0.343125	8.46641e-11	6.83846e-12	-0.452483	1.35208e-11	7.02546e-14	-0.438793	5.75341e-13	3.39074e-15
C10090_4799	mmu_circ_0002319	mmu_circ_0002319	-0.202288	0.786902	0.626658	1.79249	1.1669e-08	2.12404e-09	0.00312893	0.952422	0.901806	3.11072	8.73549e-24	4.93954e-25	0.0414382	0.931638	0.828524	-0.202782	0.396892	0.321224	-0.448553	0.0194983	0.00493974	0.323046	0.0598834	0.0388728	0.0259086	0.969943	0.925042	-1.01777	3.77845e-07	5.7897e-09
C10090_13933	mmu_circ_0002321	mmu_circ_0002321	NA	NA	NA	NA	NA	NA	NA	NA	NA	NA	NA	NA	NA	NA	NA	11.4964	7.01761e-31	1.16529e-32	NA	NA	NA	11.5599	1.01842e-28	2.22382e-30	-0.537199	0.0529713	0.0171775	-0.618562	0.0234416	0.00658156
C10090_5306	mmu_circ_0002327	mmu_circ_0002327	NA	NA	NA	8.29278	0.00208054	0.00113783	NA	NA	NA	NA	NA	NA	-0.205319	0.887945	0.733094	1.07812	0.0532889	0.0348268	NA	NA	NA	10.4287	4.76289e-13	2.82724e-14	-0.329246	0.670587	0.469284	-0.96372	0.0270863	0.00777726
C10090_12615	mmu_circ_0002328	mmu_circ_0002328	-8.74786	0.000419388	3.91668e-05	-0.580941	0.266767	0.216184	8.40301	0.00343566	0.000745636	8.48422	0.00168491	0.000906406	-8.16692	0.00262697	0.000348152	-8.16692	0.0021863	0.0010936	-8.48422	0.000867924	6.05444e-05	-8.48422	0.000993242	0.000445348	NA	NA	NA	NA	NA	NA
C10090_7112	mmu_circ_0002329	mmu_circ_0002329	NA	NA	NA	8.29278	0.00206197	0.00113783	NA	NA	NA	NA	NA	NA	-0.205319	0.886848	0.733094	0.0779057	0.9128	0.887912	8.71012	0.000691555	4.36194e-05	8.84361	9.61499e-05	2.94952e-05	-8.37069	0.00217248	0.000404838	-8.84361	0.000421217	3.40588e-05
C10090_15046	mmu_circ_0002330	mmu_circ_0002330	NA	NA	NA	8.02956	0.00566236	0.0035917	8.26538	0.00544616	0.00143958	NA	NA	NA	-8.02956	0.0037114	0.000716208	-8.02956	0.00373626	0.00204506	8.43003	0.00218438	0.000260958	NA	NA	NA	NA	NA	NA	NA	NA	NA
C10090_13469	mmu_circ_0002332	mmu_circ_0002332	-8.94046	0.000151938	9.22932e-06	0.226707	0.888532	0.864828	NA	NA	NA	8.70667	0.000600954	0.000277272	0.215457	0.817273	0.61066	0.388189	0.435123	0.359124	0.308468	0.791815	0.579308	0.32978	0.612872	0.532576	0.742707	0.11104	0.040519	1.68627	0.000185839	1.07771e-05
C10090_12376	mmu_circ_0002333	mmu_circ_0002333	NA	NA	NA	8.51491	0.000747766	0.000360456	NA	NA	NA	NA	NA	NA	0.434915	0.659862	0.39589	0.566439	0.343951	0.272242	8.43003	0.00226764	0.000260958	9.28425	3.66472e-06	7.2331e-07	-0.624791	0.441548	0.244134	0.0493569	0.983057	0.947368
C10090_3145	mmu_circ_0002334	mmu_circ_0002334	-0.47355	0.648087	0.45021	-8.64097	5.43923e-05	1.86182e-05	NA	NA	NA	NA	NA	NA	NA	NA	NA	8.49625	0.000275586	9.57038e-05	NA	NA	NA	8.84361	9.80471e-05	2.94952e-05	0.375651	0.704845	0.510738	-8.84361	0.00044048	3.40588e-05
C10090_10279	mmu_circ_0002335	mmu_circ_0002335	NA	NA	NA	NA	NA	NA	NA	NA	NA	NA	NA	NA	NA	NA	NA	NA	NA	NA	NA	NA	NA	8.35843	0.00121623	0.000572918	NA	NA	NA	-8.35843	0.00338014	0.000636664
C10090_1877	mmu_circ_0002336	mmu_circ_0002336	1.16768	0.070996	0.0262364	0.837309	0.262326	0.211508	0.302589	0.707612	0.49714	-0.00482669	0.866634	0.835744	-0.0797272	0.941835	0.854518	0.271032	0.618335	0.53873	0.72356	0.303347	0.123417	0.753884	0.160581	0.114214	0.992682	0.0245065	0.00722346	0.335625	0.658039	0.426438
C10090_950	mmu_circ_0002337	mmu_circ_0002337	NA	NA	NA	8.51491	0.000759733	0.000360456	NA	NA	NA	NA	NA	NA	-8.51491	0.000687126	3.999e-05	-8.51491	0.000457773	0.000167231	8.08215	0.0085041	0.00156122	NA	NA	NA	NA	NA	NA	NA	NA	NA
C10090_7613	mmu_circ_0002338	mmu_circ_0002338	-0.787195	0.263307	0.126545	0.83411	0.0893728	0.0653652	-0.24078	0.850983	0.699208	0.274163	0.74073	0.691348	-0.146895	0.825226	0.635308	0.788826	0.00816677	0.00470284	0.530953	0.324899	0.135171	0.329815	0.460562	0.377276	-0.129876	0.778355	0.597278	0.548933	0.246905	0.102149
C10090_14787	mmu_circ_0002339	mmu_circ_0002339	NA	NA	NA	NA	NA	NA	NA	NA	NA	NA	NA	NA	NA	NA	NA	8.49625	0.000272212	9.57038e-05	NA	NA	NA	NA	NA	NA	-8.49625	0.00137421	0.000199283	NA	NA	NA
C10090_9036	mmu_circ_0002340	mmu_circ_0002340	-1.84514	6.78694e-07	1.21682e-08	-0.857513	0.000407013	0.000175568	0.273733	0.574484	0.353418	0.86395	0.0276719	0.0188071	0.265965	0.603173	0.343034	0.904296	0.00121591	0.00054813	-0.158986	0.724237	0.491144	0.854493	0.000641998	0.000274656	0.469332	0.083324	0.0288308	0.305116	0.303767	0.135843
C10090_6095	mmu_circ_0002341	mmu_circ_0002341	-1.09512	0.0359463	0.0122065	-0.326081	0.258887	0.208576	0.461363	0.578189	0.357306	0.788796	0.250447	0.200358	0.370747	0.541273	0.288598	0.582322	0.136685	0.0969516	0.512022	0.428248	0.206074	0.80701	0.058964	0.038201	0.134405	0.83218	0.687128	0.530611	0.24187	0.0995532
C10090_13346	mmu_circ_0002342	mmu_circ_0002342	-0.805562	0.102456	0.0401106	-0.0104781	0.704719	0.65338	-0.211131	0.842257	0.677508	0.388214	0.43969	0.375744	-0.0798587	0.913758	0.797136	0.303326	0.406319	0.329936	-0.428378	0.316348	0.130556	0.300654	0.359841	0.284318	0.576951	0.104445	0.0376436	0.267581	0.56006	0.329012
C10090_6106	mmu_circ_0002348	mmu_circ_0002348	NA	NA	NA	8.40812	0.00124383	0.00064042	NA	NA	NA	NA	NA	NA	-0.195256	0.883595	0.734916	0.310587	0.65149	0.575496	8.08215	0.00777038	0.00156122	NA	NA	NA	-8.7187	0.000532432	4.82886e-05	NA	NA	NA
C10090_13306	mmu_circ_0002349	mmu_circ_0002349	NA	NA	NA	NA	NA	NA	NA	NA	NA	NA	NA	NA	NA	NA	NA	NA	NA	NA	7.94486	0.0120195	0.00283418	NA	NA	NA	NA	NA	NA	NA	NA	NA
C10090_13068	mmu_circ_0002350	mmu_circ_0002350	-8.26256	0.00303332	0.000705366	-8.26256	0.0004859	0.000222858	NA	NA	NA	NA	NA	NA	NA	NA	NA	NA	NA	NA	8.94457	0.000202962	7.29102e-06	NA	NA	NA	NA	NA	NA	NA	NA	NA
C10090_10149	mmu_circ_0002352	mmu_circ_0002352	-0.0310826	0.973118	0.944734	0.261753	0.709963	0.65999	0.0116029	0.914613	0.821472	0.348174	0.480213	0.415022	-0.252599	0.604065	0.343788	-0.324045	0.327162	0.257008	-0.152963	0.74512	0.516044	-0.243892	0.492406	0.408268	-0.607943	0.184998	0.0760264	-0.936301	0.0294679	0.0085236
C10090_472	mmu_circ_0002354	mmu_circ_0002354	NA	NA	NA	8.02956	0.00592296	0.0035917	NA	NA	NA	NA	NA	NA	0.183298	0.904265	0.778698	0.689141	0.320312	0.250182	NA	NA	NA	NA	NA	NA	-0.262144	0.807166	0.641882	9.18933	9.19688e-05	4.03258e-06
C10090_8868	mmu_circ_0002355	mmu_circ_0002355	8.30469	0.00329373	0.000689242	NA	NA	NA	NA	NA	NA	NA	NA	NA	NA	NA	NA	8.23362	0.00102265	0.00044214	NA	NA	NA	9.28425	3.70854e-06	7.2331e-07	0.545115	0.579839	0.367706	-0.535382	0.50299	0.279834
C10090_14217	mmu_circ_0002357	mmu_circ_0002357	9.48925	2.73294e-06	6.28934e-08	NA	NA	NA	0.940149	0.101301	0.0353736	-8.81089	7.19085e-05	2.53618e-05	8.43505	0.00102019	9.20818e-05	9.55536	3.74822e-08	4.57962e-09	8.2075	0.0049432	0.000860002	10.4287	4.74594e-13	2.82724e-14	0.316395	0.630552	0.423396	-0.317408	0.539511	0.3102
C10090_12404	mmu_circ_0002359	mmu_circ_0002359	-0.323485	0.223123	0.102874	0.109908	0.910926	0.89298	-0.468413	0.141016	0.0524198	-0.0811973	0.419021	0.356882	-0.215507	0.427633	0.196832	-1.27422	1.80777e-08	2.07164e-09	0.349423	0.158669	0.0537514	-1.19728	3.42339e-06	6.50278e-07	0.240415	0.578366	0.368138	0.188841	0.756743	0.550164
C10090_13406	mmu_circ_0002360	mmu_circ_0002360	-0.337801	0.313197	0.159909	0.182029	0.851352	0.818332	0.676613	0.0485317	0.015448	0.968081	0.00452404	0.00268456	-0.105835	0.801049	0.58267	-0.822171	0.000916115	0.000389884	0.0266891	0.990021	0.977408	-0.637751	0.0282757	0.0174378	-0.120563	0.811491	0.652796	-0.728879	0.087967	0.029032
C10090_6012	mmu_circ_0002361	mmu_circ_0002361	0.0468588	0.915216	0.828274	0.266594	0.649755	0.59602	0.369294	0.315312	0.145549	0.324807	0.515227	0.450158	-0.655968	0.0333574	0.00852156	-1.19941	0.000122203	3.63754e-05	0.240675	0.623368	0.373526	-0.0484009	0.898806	0.86527	0.291487	0.620486	0.41312	-0.638081	0.111357	0.0380116
C10090_10257	mmu_circ_0002363	mmu_circ_0002363	NA	NA	NA	NA	NA	NA	NA	NA	NA	NA	NA	NA	7.94953	0.00627105	0.00132029	NA	NA	NA	NA	NA	NA	NA	NA	NA	NA	NA	NA	NA	NA	NA
C10090_1841	mmu_circ_0002364	mmu_circ_0002364	-0.943196	0.217203	0.099331	1.7669	9.5041e-06	2.77146e-06	0.610979	0.349712	0.166877	1.56645	0.000719916	0.000354018	-1.00176	0.00257407	0.00039686	-1.05909	0.00103999	0.000465418	-0.69149	0.0829469	0.0247732	-0.360385	0.342364	0.268114	0.808199	0.042322	0.0132843	0.209981	0.767426	0.564624
C10090_8467	mmu_circ_0002365	mmu_circ_0002365	-0.832153	0.0511917	0.0180822	0.362628	0.476534	0.41385	-0.497903	0.408279	0.210274	-0.104232	0.588284	0.52499	-0.359916	0.380029	0.166151	0.32582	0.241321	0.181807	0.262017	0.657244	0.40714	0.268339	0.465752	0.383404	-0.0993506	0.813721	0.663046	0.381486	0.387379	0.190493
C10090_260	mmu_circ_0002370	mmu_circ_0002370	0.00789521	0.960621	0.923862	-1.49606	1.41333e-10	2.05924e-11	-0.179212	0.743671	0.539648	-1.21124	2.9689e-08	5.6961e-09	-0.145365	0.826262	0.634924	-0.381005	0.33418	0.263412	-0.519691	0.158818	0.053835	-0.228979	0.511531	0.428246	-9.81842	5.52262e-08	5.73914e-10	-0.88629	0.0343159	0.0100796
C10090_12740	mmu_circ_0002373	mmu_circ_0002373	NA	NA	NA	10.515	1.05238e-13	1.18347e-14	NA	NA	NA	10.069	3.56909e-09	6.0859e-10	-0.980318	0.00937687	0.00218098	-10.515	1.29402e-14	6.39316e-16	0.386589	0.470305	0.234858	-10.069	8.61318e-10	8.0526e-11	NA	NA	NA	NA	NA	NA
C10090_3734	mmu_circ_0002374	mmu_circ_0002374	NA	NA	NA	10.6618	3.81188e-15	3.7626e-16	NA	NA	NA	10.8764	7.77778e-16	6.91358e-17	0.457876	0.164349	0.0541678	-10.6618	3.50597e-16	1.49496e-17	-0.166236	0.704401	0.460332	-10.8764	5.36015e-17	2.09088e-18	NA	NA	NA	NA	NA	NA
C10090_592	mmu_circ_0002383	mmu_circ_0002383	NA	NA	NA	NA	NA	NA	0.0743612	0.919087	0.827792	0.136813	0.972365	0.968086	9.32823	3.12193e-06	3.12384e-08	8.23362	0.0010241	0.00044214	-8.70667	0.000317824	1.22138e-05	0.0300715	0.96403	0.948702	0.545115	0.580055	0.367706	0.526529	0.559852	0.327834
C10090_1795	mmu_circ_0002387	mmu_circ_0002387	NA	NA	NA	8.61434	0.000465244	0.000202882	NA	NA	NA	9.54303	1.63059e-06	4.10786e-07	1.05791	0.0593949	0.0162162	0.689439	0.213004	0.157985	-0.750242	0.223093	0.0827048	-0.599931	0.272019	0.206566	-0.847221	0.233418	0.101163	-0.542221	0.564186	0.332766
C10090_11012	mmu_circ_0002392	mmu_circ_0002392	0.352188	0.723955	0.537784	-8.40003	0.000240621	9.74236e-05	-0.0291122	0.986518	0.96648	-8.43212	0.000599784	0.000284122	8.8756	0.00012432	3.3003e-06	NA	NA	NA	8.32328	0.00325896	0.000473734	NA	NA	NA	NA	NA	NA	8.2635	0.00604762	0.00147413
C10090_5111	mmu_circ_0002394	mmu_circ_0002394	0.258329	0.737126	0.561178	-9.11061	1.2101e-06	2.97248e-07	-8.91767	0.000451051	3.52658e-05	-8.91767	3.4321e-05	1.13346e-05	8.08746	0.0040031	0.000678492	NA	NA	NA	NA	NA	NA	NA	NA	NA	NA	NA	NA	NA	NA	NA
C10090_10700	mmu_circ_0002399	mmu_circ_0002399	NA	NA	NA	NA	NA	NA	NA	NA	NA	NA	NA	NA	NA	NA	NA	8.81826	3.78838e-05	9.63792e-06	8.32328	0.00327307	0.000473734	NA	NA	NA	-0.361703	0.710116	0.516738	8.40088	0.00359854	0.000765178
C10090_9110	mmu_circ_0002401	mmu_circ_0002401	0.0806147	0.850346	0.737482	0.0782269	0.85835	0.828582	-0.128227	0.893817	0.779914	-0.562701	0.0134548	0.00883962	-0.1687	0.746001	0.504088	1.04463	6.27805e-06	1.29474e-06	-0.180183	0.694213	0.44715	1.02065	3.52898e-05	9.12732e-06	-0.0762015	0.815025	0.664494	0.14085	0.721975	0.51025
C10090_14191	mmu_circ_0002405	mmu_circ_0002405	-0.0951466	0.941079	0.892476	0.030217	0.873379	0.84524	NA	NA	NA	NA	NA	NA	0.241716	0.856482	0.676336	0.203473	0.782011	0.72526	8.79279	0.000460184	2.4028e-05	8.84361	9.66844e-05	2.94952e-05	0.0758771	0.964853	0.907882	-0.201917	0.842287	0.694956
C10090_11048	mmu_circ_0002408	mmu_circ_0002408	NA	NA	NA	9.35138	2.49955e-06	6.47328e-07	NA	NA	NA	9.75706	1.76653e-07	3.844e-08	-0.723482	0.294574	0.115977	0.145073	0.781737	0.723884	-0.490504	0.41691	0.194088	-1.02032	0.0485818	0.0310524	0.462823	0.432259	0.236446	0.664139	0.402984	0.202252
C10090_3723	mmu_circ_0002409	mmu_circ_0002409	NA	NA	NA	8.16692	0.00347971	0.00202156	NA	NA	NA	NA	NA	NA	0.16131	0.913758	0.796016	0.551788	0.422139	0.3446	7.94486	0.0124496	0.00283418	NA	NA	NA	0.738061	0.28419	0.131087	NA	NA	NA
C10090_946	mmu_circ_0002410	mmu_circ_0002410	-0.635686	0.248116	0.117186	0.875576	0.021494	0.0145072	-9.43233	1.78678e-05	4.4247e-07	1.44411	0.000287707	0.000118564	-0.0798663	0.875696	0.742652	0.0952832	0.767222	0.707612	0.121374	0.848102	0.677348	0.744833	0.00253834	0.00130388	0.18913	0.657104	0.455658	-0.3945	0.167461	0.0619788
C10090_11712	mmu_circ_0002411	mmu_circ_0002411	-0.163888	0.786275	0.62679	1.12213	0.000194024	7.73626e-05	-9.91782	1.6558e-07	1.29e-09	1.69556	7.1403e-08	1.46262e-08	-0.174695	0.638022	0.375882	0.28043	0.200872	0.147669	0.0317429	0.975636	0.949758	0.400227	0.0553281	0.035646	0.210858	0.458625	0.258234	-0.264864	0.302707	0.134655
C10090_14820	mmu_circ_0002412	mmu_circ_0002412	NA	NA	NA	9.79507	1.96721e-08	3.6696e-09	NA	NA	NA	9.2211	2.46911e-05	7.93702e-06	-0.36002	0.587969	0.328624	0.816789	0.0162847	0.00975812	0.259686	0.791145	0.580636	0.985178	0.0212297	0.0128674	-0.610869	0.131749	0.049818	-0.564411	0.275128	0.117717
C10090_4108	mmu_circ_0002416	mmu_circ_0002416	NA	NA	NA	NA	NA	NA	NA	NA	NA	NA	NA	NA	NA	NA	NA	NA	NA	NA	NA	NA	NA	NA	NA	NA	8.57213	0.00120942	0.000151392	NA	NA	NA
C10090_15570	mmu_circ_0002417	mmu_circ_0002417	-8.52552	0.00110918	0.000166213	0.351917	0.753452	0.708922	NA	NA	NA	8.48422	0.00165513	0.000906406	0.837838	0.139821	0.0444562	0.203913	0.737414	0.669992	0.225899	0.876675	0.725436	0.359388	0.609038	0.527308	1.2499	0.00515694	0.00137876	-0.580103	0.551779	0.321546
C10090_5337	mmu_circ_0002418	mmu_circ_0002418	-9.26256	1.41861e-05	5.12476e-07	-0.648223	0.145584	0.110719	8.40301	0.00335396	0.000745636	NA	NA	NA	0.335485	0.745726	0.506034	-8.61434	0.000264378	8.94268e-05	8.2075	0.00500327	0.000860002	8.62132	0.00034371	0.000129993	8.57213	0.00119144	0.000151392	-8.62132	0.0012059	0.000147255
C10090_15703	mmu_circ_0002420	mmu_circ_0002420	NA	NA	NA	8.51491	0.000736479	0.000360456	NA	NA	NA	9.48402	2.77832e-06	7.42718e-07	0.505235	0.573844	0.317214	0.0968513	0.886226	0.854796	-0.276271	0.712767	0.473094	-0.277735	0.622676	0.546508	-8.61176	0.000845915	9.80974e-05	-9.20628	4.92289e-05	1.822e-06
C10090_13948	mmu_circ_0002422	mmu_circ_0002422	NA	NA	NA	8.51491	0.00074365	0.000360456	NA	NA	NA	8.2211	0.00473694	0.00296306	-0.0798661	0.950636	0.879974	-8.51491	0.000446253	0.000167231	0.40168	0.754617	0.53255	-8.2211	0.00300298	0.00162404	NA	NA	NA	8.40088	0.00341672	0.000765178
C10090_2073	mmu_circ_0002425	mmu_circ_0002425	NA	NA	NA	NA	NA	NA	NA	NA	NA	NA	NA	NA	NA	NA	NA	NA	NA	NA	7.94486	0.0128383	0.00283418	NA	NA	NA	NA	NA	NA	NA	NA	NA
C10090_1633	mmu_circ_0002427	mmu_circ_0002427	NA	NA	NA	NA	NA	NA	NA	NA	NA	8.2211	0.00489713	0.00296306	NA	NA	NA	8.49625	0.000277387	9.57038e-05	-8.2211	0.00237911	0.000300122	-8.2211	0.00309519	0.00162404	-8.49625	0.00144977	0.000199283	NA	NA	NA
C10090_5745	mmu_circ_0002428	mmu_circ_0002428	NA	NA	NA	8.29278	0.00207509	0.00113783	NA	NA	NA	NA	NA	NA	-8.29278	0.00157858	0.000169237	1.26257	0.01765	0.0106559	7.94486	0.011935	0.00283418	NA	NA	NA	-0.0396562	0.965975	0.911448	8.40088	0.00344208	0.000765178
C10090_1161	mmu_circ_0002430	mmu_circ_0002430	NA	NA	NA	8.51491	0.000757766	0.000360456	8.75087	0.000940337	0.00010361	NA	NA	NA	-0.427448	0.720511	0.465382	0.855994	0.116825	0.081452	9.48079	3.70522e-06	3.40496e-08	10.1657	6.44291e-11	5.08112e-12	0.255716	0.739964	0.550866	-0.179961	0.769657	0.576426
C10090_15724	mmu_circ_0002432	mmu_circ_0002432	-0.40328	0.554977	0.35553	0.276106	0.756789	0.713304	0.525167	0.465307	0.253498	0.480508	0.53225	0.468778	0.0326072	0.96979	0.925826	-0.305127	0.492616	0.412432	0.501227	0.46119	0.228572	0.602962	0.197975	0.144294	0.429712	0.455086	0.255274	0.0913366	0.931194	0.84185
C10090_3213	mmu_circ_0002436	mmu_circ_0002436	8.65284	0.000717664	9.3909e-05	NA	NA	NA	NA	NA	NA	8.2211	0.00483906	0.00296306	NA	NA	NA	NA	NA	NA	-8.2211	0.00232899	0.000300122	-8.2211	0.00305934	0.00162404	NA	NA	NA	NA	NA	NA
C10090_10075	mmu_circ_0002437	mmu_circ_0002437	0.0568043	0.941849	0.891442	-9.11061	1.21824e-06	2.97248e-07	1.15547	0.0624133	0.020405	-8.43212	0.000603992	0.000284122	NA	NA	NA	NA	NA	NA	NA	NA	NA	NA	NA	NA	NA	NA	NA	NA	NA	NA
C10090_14891	mmu_circ_0002438	mmu_circ_0002438	8.30469	0.00317595	0.000689242	NA	NA	NA	8.26538	0.00547497	0.00143958	NA	NA	NA	NA	NA	NA	NA	NA	NA	NA	NA	NA	NA	NA	NA	NA	NA	NA	NA	NA	NA
C10090_6224	mmu_circ_0002442	mmu_circ_0002442	NA	NA	NA	NA	NA	NA	NA	NA	NA	8.2211	0.00473028	0.00296306	NA	NA	NA	8.23362	0.0009985	0.00044214	-8.2211	0.00221757	0.000300122	-8.2211	0.00299828	0.00162404	-8.23362	0.00354596	0.000822422	NA	NA	NA
C10090_6133	mmu_circ_0002449	mmu_circ_0002449	-0.773042	0.359484	0.190852	-0.910897	0.0944809	0.0693144	NA	NA	NA	NA	NA	NA	-8.02956	0.00375913	0.000716208	-8.02956	0.00375878	0.00204506	8.43003	0.00221145	0.000260958	NA	NA	NA	NA	NA	NA	NA	NA	NA
C10090_5367	mmu_circ_0002450	mmu_circ_0002450	NA	NA	NA	9.51491	5.03538e-07	1.15422e-07	NA	NA	NA	9.06905	7.21698e-05	2.59462e-05	-0.363641	0.633715	0.371274	-9.51491	1.86209e-07	2.61486e-08	0.0773945	0.969694	0.914404	-9.06905	3.48501e-05	9.18352e-06	NA	NA	NA	8.2635	0.00584415	0.00147413
C10090_12555	mmu_circ_0002451	mmu_circ_0002451	NA	NA	NA	10.3224	5.1648e-12	6.61366e-13	NA	NA	NA	10.5996	4.14245e-13	4.66652e-14	-0.372698	0.466639	0.225172	-2.08876	1.05249e-05	2.34318e-06	-0.517485	0.193266	0.0689024	-1.75603	4.01765e-05	1.07745e-05	1.1617	0.0875042	0.0305872	0.621347	0.424223	0.219412
C10090_1763	mmu_circ_0002454	mmu_circ_0002454	NA	NA	NA	NA	NA	NA	-8.91767	0.000443165	3.52658e-05	-8.91767	3.4761e-05	1.13346e-05	8.21286	0.00243924	0.000348676	NA	NA	NA	8.32328	0.00332099	0.000473734	8.9431	5.15336e-05	1.40497e-05	8.33136	0.00298478	0.000587228	-8.9431	0.000255453	1.63798e-05
C10090_10868	mmu_circ_0002457	mmu_circ_0002457	0.252452	0.0215271	0.00691262	-1.48785	1.93654e-35	6.71608e-37	-0.215122	0.244101	0.103509	-2.15579	3.36235e-67	5.54844e-69	0.278772	0.18938	0.064622	-0.376711	0.0507534	0.0329824	0.579195	0.00280849	0.000390654	-0.332297	0.134312	0.0935944	-0.36496	0.181356	0.0741014	0.292065	0.354837	0.168886
C10090_15105	mmu_circ_0002470	mmu_circ_0002470	NA	NA	NA	8.16692	0.00342288	0.00202156	NA	NA	NA	9.2211	2.46743e-05	7.93702e-06	1.26813	0.0409111	0.0107353	-8.16692	0.00215626	0.0010936	-0.138955	0.870952	0.71306	-9.2211	1.11539e-05	2.51832e-06	8.45656	0.00178561	0.000298164	NA	NA	NA
C10090_10202	mmu_circ_0002471	mmu_circ_0002471	NA	NA	NA	9.09987	2.06923e-05	6.45016e-06	NA	NA	NA	9.80607	1.00446e-07	2.12606e-08	0.335171	0.686661	0.427954	-0.281611	0.651436	0.574514	-0.229204	0.729729	0.497002	-9.80607	3.16498e-08	3.90506e-09	-0.246131	0.808721	0.649422	8.94134	0.00041888	2.88338e-05
C10090_1275	mmu_circ_0002472	mmu_circ_0002472	NA	NA	NA	NA	NA	NA	NA	NA	NA	NA	NA	NA	NA	NA	NA	9.43505	1.5473e-07	2.11572e-08	NA	NA	NA	9.28425	3.70451e-06	7.2331e-07	-0.755917	0.261969	0.118919	-9.28425	2.97365e-05	8.76252e-07
C10090_4476	mmu_circ_0002473	mmu_circ_0002473	0.116342	0.843312	0.69505	-0.310874	0.230961	0.184371	-0.246961	0.772632	0.587966	-0.376357	0.216073	0.169198	-0.391762	0.528574	0.276646	2.59611	1.29905e-29	2.23698e-31	0.293909	0.655948	0.405104	2.41473	1.32805e-22	3.68824e-24	-0.719278	0.000224831	1.46559e-05	-0.033186	0.88603	0.76029
C10090_7634	mmu_circ_0002476	mmu_circ_0002476	NA	NA	NA	NA	NA	NA	NA	NA	NA	NA	NA	NA	7.94953	0.00582473	0.00132029	8.37069	0.000518298	0.000205704	NA	NA	NA	NA	NA	NA	-8.37069	0.00215608	0.000404838	NA	NA	NA
C10090_1323	mmu_circ_0002478	mmu_circ_0002478	8.43045	0.00190155	0.000354664	NA	NA	NA	-8.43212	0.00336297	0.000653132	-8.43212	0.000605692	0.000284122	NA	NA	NA	NA	NA	NA	NA	NA	NA	NA	NA	NA	NA	NA	NA	NA	NA	NA
C10090_12553	mmu_circ_0002479	mmu_circ_0002479	8.16742	0.00502059	0.00133945	NA	NA	NA	NA	NA	NA	NA	NA	NA	NA	NA	NA	NA	NA	NA	NA	NA	NA	NA	NA	NA	8.33136	0.00289781	0.000587228	NA	NA	NA
C10090_4889	mmu_circ_0002480	mmu_circ_0002480	0.343475	1.29405e-08	1.62752e-10	-0.579876	6.89329e-28	3.16868e-29	-0.141402	0.345834	0.164449	-0.999842	9.81159e-63	1.79178e-64	0.264582	0.000572949	3.2409e-05	0.514378	2.26072e-14	1.12619e-15	0.124668	0.309276	0.126798	0.88523	4.61293e-40	6.94336e-42	-0.07179	0.394632	0.206916	-0.041147	0.552283	0.32197
C10090_6197	mmu_circ_0002482	mmu_circ_0002482	0.859145	0.119352	0.047907	2.36708	1.36815e-10	1.9906e-11	-0.834051	0.204424	0.0826454	1.50961	6.87994e-06	1.95272e-06	0.239111	0.467206	0.225732	-2.30867	1.5777e-11	1.10937e-12	-0.0939317	0.795991	0.588016	-1.43163	3.13004e-06	5.92564e-07	0.730918	0.229351	0.0988042	-0.753917	0.178015	0.0673118
C10090_375	mmu_circ_0002484	mmu_circ_0002484	NA	NA	NA	NA	NA	NA	NA	NA	NA	NA	NA	NA	NA	NA	NA	NA	NA	NA	NA	NA	NA	NA	NA	NA	NA	NA	NA	8.2635	0.00621595	0.00147413
C10090_5797	mmu_circ_0002488	mmu_circ_0002488	-0.358103	0.628191	0.42832	0.673906	0.179456	0.139352	0.269244	0.691837	0.480282	0.98655	0.0449491	0.0312814	-0.17928	0.786111	0.56121	-1.38116	0.00147877	0.000703916	-0.313831	0.559492	0.30931	-10.1845	1.39146e-10	1.15635e-11	-0.0395284	0.970097	0.930688	8.84831	0.000625032	5.55486e-05
C10090_10981	mmu_circ_0002490	mmu_circ_0002490	-0.141002	0.779352	0.612512	-2.32627	8.88646e-11	1.26741e-11	-0.63243	0.13667	0.0505382	-2.36884	1.12297e-09	1.79131e-10	0.405805	0.675965	0.414248	0.203921	0.757943	0.696102	0.271132	0.827725	0.647762	-8.59954	0.000586386	0.000233212	-8.81826	0.000320519	2.37702e-05	NA	NA	NA
C10090_14419	mmu_circ_0002494	mmu_circ_0002494	-0.301634	0.769052	0.597008	-8.84737	1.19574e-05	3.55802e-06	0.0965252	0.909201	0.809022	-8.43212	0.000589112	0.000284122	NA	NA	NA	NA	NA	NA	NA	NA	NA	NA	NA	NA	NA	NA	NA	NA	NA	NA
C10090_7569	mmu_circ_0002497	mmu_circ_0002497	-1.04642	0.0601239	0.0217038	-9.79863	2.23241e-10	3.3122e-11	0.0556461	0.927533	0.844948	-8.69523	0.000145391	5.67488e-05	NA	NA	NA	NA	NA	NA	NA	NA	NA	NA	NA	NA	NA	NA	NA	NA	NA	NA
C10090_13031	mmu_circ_0002502	mmu_circ_0002502	-8.52552	0.00118765	0.000166213	-8.52552	0.000112426	4.25894e-05	NA	NA	NA	NA	NA	NA	NA	NA	NA	NA	NA	NA	NA	NA	NA	NA	NA	NA	NA	NA	NA	NA	NA	NA
C10090_15416	mmu_circ_0002510	mmu_circ_0002510	0.168044	0.847705	0.732016	1.14571	0.0263852	0.0179818	0.759429	0.314861	0.145866	0.636923	0.421203	0.358926	-1.19542	0.0116751	0.00274176	-1.27438	0.00548005	0.0030793	0.507815	0.501528	0.259772	-9.06905	3.45996e-05	9.18352e-06	0.240428	0.813024	0.659214	8.5263	0.00223454	0.000397182
C10090_2906	mmu_circ_0002514	mmu_circ_0002514	0.29909	0.538374	0.34158	2.45155	1.54629e-24	8.66276e-26	0.0428192	0.884597	0.767438	2.35865	9.27816e-21	6.18544e-22	0.139795	0.541519	0.288508	1.15493	5.10189e-22	1.29691e-23	0.102107	0.770508	0.550524	0.211178	0.203901	0.149133	-0.0972044	0.505623	0.300818	0.64056	2.86774e-05	9.19406e-07
C10090_9640	mmu_circ_0002515	mmu_circ_0002515	0.794606	0.0239894	0.00776752	2.75639	1.28802e-33	4.78416e-35	0.344264	0.357217	0.172347	2.47245	1.8769e-29	8.094e-31	0.409403	0.00283251	0.000346472	1.23294	9.01478e-31	1.5154e-32	-0.210558	0.193039	0.0689426	0.331214	0.012216	0.00718664	-0.22376	0.0350425	0.0108008	0.370707	0.00528966	0.0012345
C10090_882	mmu_circ_0002516	mmu_circ_0002516	NA	NA	NA	9.56567	2.95862e-07	6.49646e-08	NA	NA	NA	9.2211	2.53149e-05	7.93702e-06	-0.130628	0.887645	0.731034	0.989683	0.00513049	0.00287446	0.208931	0.843797	0.66827	0.815207	0.0697231	0.0457184	-0.257293	0.593662	0.383062	0.190462	0.799203	0.617018
C10090_3798	mmu_circ_0002517	mmu_circ_0002517	0.992345	0.0543277	0.0194516	2.77837	1.48271e-16	1.29924e-17	0.205058	0.76707	0.574342	2.0935	2.07069e-08	3.91814e-09	0.335195	0.143855	0.046003	1.01918	7.25464e-10	6.64786e-11	0.0727856	0.916716	0.802988	0.810944	0.000133398	4.28728e-05	0.0163996	0.969877	0.933226	0.256826	0.320285	0.147005
C10090_1680	mmu_circ_0002519	mmu_circ_0002519	-0.564747	0.277181	0.135512	1.78695	8.94721e-11	1.27791e-11	-0.652134	0.432632	0.227872	1.87224	9.84617e-08	2.06672e-08	-0.119928	0.730197	0.478796	0.613953	0.000285422	0.000101109	0.292279	0.377949	0.167504	0.811207	8.57261e-05	2.51708e-05	0.0114446	0.97783	0.96559	0.13034	0.705783	0.48716
C10090_4775	mmu_circ_0002521	mmu_circ_0002521	NA	NA	NA	11.7076	3.22013e-31	1.26215e-32	NA	NA	NA	11.4537	1.28968e-23	7.34932e-25	-0.234369	0.439253	0.20523	1.39367	6.41779e-20	1.88139e-21	0.298312	0.344942	0.146463	1.77242	1.43761e-27	3.32202e-29	-0.0545886	0.791781	0.61824	-0.510001	0.000518517	4.24152e-05
C10090_15980	mmu_circ_0002524	mmu_circ_0002524	NA	NA	NA	NA	NA	NA	NA	NA	NA	NA	NA	NA	NA	NA	NA	NA	NA	NA	8.62278	0.000940791	7.91852e-05	9.42857	9.72539e-07	1.64117e-07	NA	NA	NA	-9.42857	8.59726e-06	2.0267e-07
C10090_338	mmu_circ_0002525	mmu_circ_0002525	-8.84737	0.000264128	1.90127e-05	0.108279	0.952312	0.940196	9.19155	8.95578e-05	3.8624e-06	9.59954	9.37896e-07	2.272e-07	0.579042	0.390563	0.17299	-8.95565	2.97758e-05	7.3127e-06	-0.4531	0.49008	0.250772	-0.170971	0.756895	0.695278	8.45656	0.00196334	0.000298164	-0.239239	0.769883	0.57714
C10090_11291	mmu_circ_0002530	mmu_circ_0002530	NA	NA	NA	NA	NA	NA	NA	NA	NA	8.59954	0.000993243	0.00050132	NA	NA	NA	NA	NA	NA	-8.59954	0.000500777	2.71934e-05	-8.59954	0.00058545	0.000233212	NA	NA	NA	NA	NA	NA
C10090_9497	mmu_circ_0002532	mmu_circ_0002532	NA	NA	NA	NA	NA	NA	NA	NA	NA	NA	NA	NA	NA	NA	NA	8.81826	3.80678e-05	9.63792e-06	NA	NA	NA	8.73674	0.000188196	6.19208e-05	-8.81826	0.000325706	2.37702e-05	-0.473236	0.657022	0.42392
C10090_9439	mmu_circ_0002561	mmu_circ_0002561	NA	NA	NA	NA	NA	NA	NA	NA	NA	NA	NA	NA	NA	NA	NA	8.49625	0.000278048	9.57038e-05	NA	NA	NA	8.84361	9.89537e-05	2.94952e-05	-8.49625	0.0014598	0.000199283	-8.84361	0.000457207	3.40588e-05
C10090_493	mmu_circ_0002562	mmu_circ_0002562	NA	NA	NA	NA	NA	NA	NA	NA	NA	NA	NA	NA	NA	NA	NA	NA	NA	NA	NA	NA	NA	NA	NA	NA	NA	NA	NA	8.40088	0.00367182	0.000765178
C10090_12526	mmu_circ_0002563	mmu_circ_0002563	NA	NA	NA	NA	NA	NA	NA	NA	NA	NA	NA	NA	NA	NA	NA	8.49625	0.00027413	9.57038e-05	NA	NA	NA	NA	NA	NA	-8.49625	0.00140627	0.000199283	9.26327	5.34901e-05	2.0932e-06
C10090_6580	mmu_circ_0002564	mmu_circ_0002564	-0.232607	0.862757	0.725852	-8.40003	0.000238446	9.74236e-05	NA	NA	NA	NA	NA	NA	NA	NA	NA	8.91139	1.87751e-05	4.48402e-06	NA	NA	NA	9.03645	2.64388e-05	6.69238e-06	0.545373	0.448412	0.249624	-9.03645	0.000144036	7.87752e-06
C10090_13801	mmu_circ_0002565	mmu_circ_0002565	-0.115947	0.81858	0.667218	0.817673	0.00168314	0.00088699	-0.681291	0.0426603	0.0133299	0.500251	0.067391	0.0479966	0.481718	0.00780859	0.00180186	-1.33217	1.94982e-08	2.28638e-09	-0.0714194	0.801477	0.598764	-0.667438	0.00235076	0.00120404	0.33878	0.409536	0.219954	0.276144	0.453668	0.241058
C10090_2104	mmu_circ_0002583	mmu_circ_0002583	-0.723489	0.375066	0.20314	-0.413841	0.33965	0.281032	-9.19795	8.30235e-05	3.9502e-06	-0.0507489	0.789791	0.746348	0.18332	0.889783	0.726072	-8.61434	0.000268116	8.94268e-05	-0.000763533	0.975543	0.950278	-9.1472	2.00038e-05	4.80906e-06	NA	NA	NA	NA	NA	NA
C10090_4224	mmu_circ_0002585	mmu_circ_0002585	NA	NA	NA	12.1423	2.76971e-42	7.38892e-44	NA	NA	NA	11.3749	2.32993e-22	1.42e-23	-0.27607	0.232893	0.0850818	-1.87326	1.53161e-15	6.97044e-17	0.154749	0.735402	0.504552	-2.33843	4.25022e-11	3.31584e-12	-0.0397103	0.957009	0.887392	0.297154	0.767692	0.565906
C10090_13176	mmu_circ_0002586	mmu_circ_0002586	NA	NA	NA	NA	NA	NA	NA	NA	NA	NA	NA	NA	8.08746	0.00400793	0.000678492	NA	NA	NA	NA	NA	NA	NA	NA	NA	NA	NA	NA	NA	NA	NA
C10090_14081	mmu_circ_0002588	mmu_circ_0002588	0.774155	0.0046651	0.00134697	0.295359	0.597882	0.539726	0.302799	0.345709	0.164486	0.154394	0.868795	0.83821	0.167067	0.720527	0.463774	-1.21754	0.000201444	6.52484e-05	-0.587563	0.0719201	0.0211194	-0.974678	0.00275521	0.00141995	-0.203175	0.780634	0.601608	-0.241833	0.708984	0.494216
C10090_16103	mmu_circ_0002591	mmu_circ_0002591	NA	NA	NA	13.87	1.83869e-141	1.0565e-143	NA	NA	NA	13.9571	1.45281e-135	8.9502e-138	0.119696	0.350871	0.147886	-1.34384	2.24199e-31	3.63094e-33	-0.147038	0.163795	0.056035	-2.35097	2.6826e-64	2.38858e-66	-0.0105554	0.96702	0.913804	0.525008	0.0246391	0.00697586
C10090_876	mmu_circ_0002592	mmu_circ_0002592	NA	NA	NA	11.8265	6.27576e-34	2.26664e-35	NA	NA	NA	11.6541	3.87626e-27	1.84218e-28	0.000913312	0.999352	0.999352	-1.59317	2.76152e-10	2.40034e-11	-0.00893618	0.957219	0.87905	-2.53019	1.82082e-14	8.8397e-16	-0.152163	0.800096	0.633614	0.817478	0.167829	0.0621544
C10090_9775	mmu_circ_0002593	mmu_circ_0002593	NA	NA	NA	12.4692	3.8215e-53	7.68534e-55	NA	NA	NA	12.5358	3.04434e-50	7.23408e-52	-0.0276403	0.935253	0.837278	-1.85733	4.36076e-19	1.36777e-20	-0.358428	0.0375495	0.0102108	-2.25154	5.94534e-23	1.61332e-24	-0.0121278	0.968632	0.949872	0.0833874	0.929075	0.837306
C10090_2527	mmu_circ_0002594	mmu_circ_0002594	NA	NA	NA	12.6324	1.42605e-59	2.48746e-61	NA	NA	NA	12.0791	1.75709e-36	5.60568e-38	-0.442417	0.0065248	0.0014923	-1.57119	4.95334e-17	1.92934e-18	0.0355694	0.967868	0.919758	-1.95532	3.24894e-14	1.65994e-15	-0.461509	0.181531	0.0742586	-0.481862	0.381374	0.185742
C10090_11481	mmu_circ_0002595	mmu_circ_0002595	9.75221	1.43715e-07	2.26898e-09	14.2888	2.0237e-189	7.0599e-192	9.52865	7.49971e-06	1.43984e-07	14.3128	9.64517e-174	4.2443e-176	0.144697	0.134513	0.0420542	-1.76264	8.25225e-62	4.22932e-64	-0.270064	0.00209235	0.000223306	-2.25408	4.01159e-78	2.55136e-80	-0.203211	0.335261	0.165176	-0.0193032	0.9323	0.84329
C10090_4086	mmu_circ_0002597	mmu_circ_0002597	NA	NA	NA	9.61453	1.72656e-07	3.6565e-08	NA	NA	NA	9.89921	3.34002e-08	6.50366e-09	-0.664699	0.282115	0.109286	0.654484	0.0867895	0.058856	-1.46917	0.00505043	0.000805874	0.563399	0.134403	0.0936862	0.12631	0.839153	0.698832	-0.614295	0.174645	0.065461
C10090_10638	mmu_circ_0002599	mmu_circ_0002599	NA	NA	NA	NA	NA	NA	NA	NA	NA	NA	NA	NA	NA	NA	NA	8.49625	0.000276075	9.57038e-05	NA	NA	NA	8.84361	9.81163e-05	2.94952e-05	0.182874	0.890245	0.762196	-8.84361	0.000443182	3.40588e-05
C10090_503	mmu_circ_0002600	mmu_circ_0002600	-8.26256	0.00306863	0.000705366	1.90448	0.000280618	0.000119319	0.0138535	0.943923	0.889032	1.01109	0.0531009	0.037305	-0.539325	0.278269	0.106716	0.810524	0.00628016	0.0035482	0.266736	0.687922	0.441948	1.34772	7.05599e-06	1.47343e-06	0.789004	0.00177858	0.00029993	-0.285075	0.400396	0.200198
C10090_11739	mmu_circ_0002601	mmu_circ_0002601	8.30469	0.00310699	0.000689242	9.09987	2.05033e-05	6.45016e-06	NA	NA	NA	8.48422	0.00169392	0.000906406	-0.0126762	0.991131	0.972106	0.940827	0.0274322	0.0169947	-0.0541844	0.95809	0.88045	2.33348	5.44968e-08	7.00128e-09	0.354619	0.488546	0.282466	-0.121431	0.800366	0.619614
C10090_11941	mmu_circ_0002602	mmu_circ_0002602	NA	NA	NA	NA	NA	NA	NA	NA	NA	NA	NA	NA	NA	NA	NA	NA	NA	NA	NA	NA	NA	8.35843	0.00120484	0.000572918	NA	NA	NA	0.283259	0.84561	0.67278
C10090_10232	mmu_circ_0002604	mmu_circ_0002604	NA	NA	NA	NA	NA	NA	NA	NA	NA	NA	NA	NA	NA	NA	NA	NA	NA	NA	NA	NA	NA	8.35843	0.00121677	0.000572918	NA	NA	NA	-8.35843	0.00338862	0.000636664
C10090_5310	mmu_circ_0002605	mmu_circ_0002605	NA	NA	NA	NA	NA	NA	NA	NA	NA	NA	NA	NA	NA	NA	NA	NA	NA	NA	NA	NA	NA	8.35843	0.00119631	0.000572918	NA	NA	NA	-8.35843	0.00323441	0.000636664
C10090_828	mmu_circ_0002609	mmu_circ_0002609	-0.0952229	0.896954	0.794946	1.53687	5.07442e-08	9.85102e-09	-0.073539	0.989522	0.972452	1.16734	0.000693119	0.000339468	-0.0266044	0.950122	0.8762	-0.343646	0.111504	0.0773304	0.438173	0.129569	0.0421072	0.278039	0.285054	0.218036	0.0523997	0.912088	0.82355	0.512204	0.0416977	0.0125624
C10090_5931	mmu_circ_0002611	mmu_circ_0002611	NA	NA	NA	8.61434	0.000457706	0.000202882	-8.69523	0.00121211	0.000151767	-8.69523	0.000146049	5.67488e-05	-8.61434	0.000398302	1.94393e-05	0.619038	0.275157	0.210288	8.32328	0.00310293	0.000473734	NA	NA	NA	-9.23338	2.25492e-05	6.87022e-07	NA	NA	NA
C10090_3106	mmu_circ_0002613	mmu_circ_0002613	NA	NA	NA	NA	NA	NA	NA	NA	NA	NA	NA	NA	NA	NA	NA	NA	NA	NA	NA	NA	NA	8.35843	0.00121132	0.000572918	NA	NA	NA	-8.35843	0.00334663	0.000636664
C10090_9644	mmu_circ_0002614	mmu_circ_0002614	NA	NA	NA	8.02956	0.00588117	0.0035917	NA	NA	NA	8.59954	0.00100022	0.00050132	0.405482	0.749544	0.510002	0.341124	0.661034	0.58745	0.415595	0.699756	0.45262	-8.59954	0.000589213	0.000233212	0.501218	0.599768	0.388702	8.2635	0.00613665	0.00147413
C10090_8783	mmu_circ_0002617	mmu_circ_0002617	NA	NA	NA	NA	NA	NA	NA	NA	NA	NA	NA	NA	NA	NA	NA	8.61176	0.000148461	4.4526e-05	NA	NA	NA	NA	NA	NA	-8.61176	0.00090489	9.80974e-05	NA	NA	NA
C10090_5251	mmu_circ_0002618	mmu_circ_0002618	NA	NA	NA	NA	NA	NA	NA	NA	NA	NA	NA	NA	7.94953	0.00599763	0.00132029	NA	NA	NA	NA	NA	NA	NA	NA	NA	NA	NA	NA	NA	NA	NA
C10090_2851	mmu_circ_0002622	mmu_circ_0002622	NA	NA	NA	9.09987	2.06244e-05	6.45016e-06	8.26538	0.00546341	0.00143958	8.9867	0.000125864	4.69118e-05	-0.471975	0.585583	0.325736	-9.09987	9.64138e-06	2.09114e-06	-0.116022	0.899321	0.767278	-8.9867	6.15494e-05	1.75371e-05	NA	NA	NA	NA	NA	NA
C10090_10047	mmu_circ_0002623	mmu_circ_0002623	0.3642	0.2418	0.113427	1.33688	6.02359e-09	1.04575e-09	-0.203668	0.745268	0.541636	0.603939	0.0178575	0.0118893	-0.165899	0.519822	0.26835	-2.11812	8.58182e-20	2.53338e-21	0.248515	0.347764	0.149114	-2.52224	2.04741e-18	7.46564e-20	-0.828226	0.0847447	0.0293624	0.303427	0.704756	0.487282
C10090_6270	mmu_circ_0002625	mmu_circ_0002625	-8.84737	0.000245849	1.90127e-05	-8.84737	1.19657e-05	3.55802e-06	NA	NA	NA	NA	NA	NA	NA	NA	NA	NA	NA	NA	8.94457	0.000200629	7.29102e-06	NA	NA	NA	8.77873	0.000462894	3.903e-05	8.40088	0.00340597	0.000765178
C10090_13142	mmu_circ_0002627	mmu_circ_0002627	8.16742	0.00496088	0.00133945	NA	NA	NA	9.19155	8.73048e-05	3.8624e-06	NA	NA	NA	NA	NA	NA	NA	NA	NA	NA	NA	NA	NA	NA	NA	NA	NA	NA	NA	NA	NA
C10090_11457	mmu_circ_0002629	mmu_circ_0002629	-8.26256	0.00283436	0.000705366	0.030217	0.873749	0.84524	NA	NA	NA	8.2211	0.00483559	0.00296306	-8.29278	0.0016542	0.000169237	-8.29278	0.00127011	0.000584804	-8.2211	0.00232146	0.000300122	-8.2211	0.0030569	0.00162404	NA	NA	NA	NA	NA	NA
C10090_5500	mmu_circ_0002630	mmu_circ_0002630	NA	NA	NA	9.61453	1.7199e-07	3.6565e-08	-0.507932	0.595245	0.373974	0.1846	0.886637	0.858936	0.439536	0.435923	0.202606	0.203897	0.659166	0.58525	0.506	0.40315	0.182378	0.193708	0.703322	0.630112	-0.698703	0.222855	0.0951106	-0.094869	0.902003	0.780162
C10090_8592	mmu_circ_0002632	mmu_circ_0002632	NA	NA	NA	8.02956	0.00591696	0.0035917	NA	NA	NA	NA	NA	NA	-8.02956	0.00404997	0.000716208	-8.02956	0.00388617	0.00204506	NA	NA	NA	NA	NA	NA	NA	NA	NA	NA	NA	NA
C10090_3887	mmu_circ_0002633	mmu_circ_0002633	8.43045	0.00179591	0.000354664	8.29278	0.00210502	0.00113783	8.52865	0.00212561	0.000386206	8.35843	0.00287363	0.00163882	0.142263	0.922992	0.811788	-8.29278	0.00126617	0.000584804	0.0716029	0.97703	0.949686	-8.35843	0.00169909	0.000850448	NA	NA	NA	NA	NA	NA
C10090_11113	mmu_circ_0002634	mmu_circ_0002634	0.295568	0.479071	0.285366	0.27518	0.673293	0.621342	0.49615	0.304264	0.137825	1.11066	0.00457505	0.00271886	0.688345	0.00937148	0.00218164	-1.47424	7.4968e-05	2.04556e-05	0.0261118	0.992458	0.983752	-1.44785	0.000117818	3.76408e-05	-0.454646	0.565324	0.354362	-0.509902	0.511468	0.287806
C10090_5253	mmu_circ_0002635	mmu_circ_0002635	0.0397026	0.929671	0.859268	0.808802	0.00812686	0.0052717	0.248343	0.491647	0.276466	0.896814	0.00290952	0.00169258	-0.0391764	0.934887	0.839814	-1.26249	5.55891e-06	1.10882e-06	0.200524	0.6003	0.346414	-1.03644	0.000159471	5.15906e-05	-0.158381	0.798737	0.629708	-1.27327	0.00341359	0.000782986
C10090_15864	mmu_circ_0002638	mmu_circ_0002638	NA	NA	NA	NA	NA	NA	-8.43212	0.00311734	0.000653132	-8.43212	0.000585374	0.000284122	NA	NA	NA	NA	NA	NA	NA	NA	NA	NA	NA	NA	NA	NA	NA	NA	NA	NA
C10090_13601	mmu_circ_0002641	mmu_circ_0002641	NA	NA	NA	8.40812	0.00124582	0.00064042	NA	NA	NA	8.9867	0.000124541	4.69118e-05	0.612029	0.479943	0.234042	1.4103	0.00412037	0.00228318	-0.276578	0.765762	0.543454	0.219586	0.71965	0.650996	-0.302723	0.638183	0.433042	0.258672	0.785142	0.60135
C10090_1620	mmu_circ_0002645	mmu_circ_0002645	-0.708163	0.253354	0.120474	0.314537	0.687477	0.635278	0.629685	0.227405	0.094847	0.000219772	0.850816	0.81712	0.195893	0.777044	0.541408	0.65635	0.0505446	0.0328364	0.69038	0.204868	0.0747504	1.10395	0.00503586	0.00281312	0.092827	0.883405	0.753836	0.286092	0.590694	0.358148
C10090_8540	mmu_circ_0002647	mmu_circ_0002647	0.0118771	0.988094	0.973816	0.873943	0.165303	0.12731	-0.0463134	0.990817	0.974	-0.647208	0.139143	0.104732	-0.71725	0.261816	0.0984284	0.483961	0.251611	0.19023	0.590167	0.417611	0.193716	0.956552	0.0424502	0.0269082	-0.542107	0.320561	0.154905	0.246083	0.730049	0.51871
C10090_15233	mmu_circ_0002651	mmu_circ_0002651	0.127706	0.313914	0.160779	-1.96388	3.99946e-51	8.4536e-53	-0.48378	0.000153863	9.03316e-06	-2.97734	1.16935e-101	9.51948e-104	0.476564	0.0213504	0.0052188	-0.668582	0.00402846	0.0022273	0.742464	0.0021679	0.000263064	-0.0884094	0.780765	0.720184	-0.852621	0.0120901	0.0033809	-0.831895	0.0122517	0.00329542
C10090_2109	mmu_circ_0002652	mmu_circ_0002652	NA	NA	NA	10.2926	9.01728e-12	1.17504e-12	NA	NA	NA	10.0285	6.26707e-09	1.10036e-09	-0.020972	0.976354	0.93907	-10.2926	1.58632e-12	9.56084e-14	-0.547668	0.289469	0.116622	-10.0285	1.57344e-09	1.53775e-10	NA	NA	NA	NA	NA	NA
C10090_13487	mmu_circ_0002653	mmu_circ_0002653	NA	NA	NA	10.4625	3.19376e-13	3.73578e-14	NA	NA	NA	10.3585	3.87537e-11	5.32916e-12	0.487179	0.165289	0.0547476	-10.4625	4.32764e-14	2.23568e-15	0.194992	0.766139	0.545322	-10.3585	6.52859e-12	4.55354e-13	NA	NA	NA	NA	NA	NA
C10090_2548	mmu_circ_0002655	mmu_circ_0002655	NA	NA	NA	11.2154	3.36988e-22	2.17144e-23	NA	NA	NA	11.1471	4.30232e-19	3.13326e-20	-0.806233	0.00455492	0.0009041	-2.98179	4.32594e-14	2.25254e-15	-0.149263	0.704466	0.460522	-11.1471	1.48389e-20	4.65582e-22	-8.23362	0.00369653	0.000822422	NA	NA	NA
C10090_5386	mmu_circ_0002656	mmu_circ_0002656	-0.390481	0.559508	0.360978	-0.180491	0.477209	0.415122	-1.31373	0.0187714	0.00553636	-0.773207	0.0449437	0.0312974	0.604678	0.224662	0.0811574	0.718469	0.0642997	0.0427874	0.501227	0.461384	0.228572	0.789283	0.0734747	0.048412	-0.274103	0.617535	0.408238	0.25303	0.704239	0.484434
C10090_1940	mmu_circ_0002659	mmu_circ_0002659	0.562013	0.241399	0.113174	0.899548	0.0329808	0.022761	0.389665	0.337467	0.159156	0.534252	0.209823	0.163888	0.236986	0.620297	0.359106	0.125797	0.719568	0.649352	-0.000763578	0.976099	0.932472	0.858832	0.000748158	0.000321976	-0.0665859	0.902702	0.79674	-0.440088	0.120757	0.041761
C10090_9882	mmu_circ_0002660	mmu_circ_0002660	0.00418828	0.987222	0.9719	0.483196	0.378186	0.31835	-0.119381	0.936647	0.875142	-0.260169	0.40072	0.338474	0.069017	0.926581	0.818918	-0.675865	0.0842906	0.057075	0.113616	0.916843	0.802716	0.0865505	0.859188	0.817294	0.673943	0.166223	0.0665048	-0.442728	0.483887	0.265556
C10090_3985	mmu_circ_0002662	mmu_circ_0002662	-9.11061	4.46555e-05	2.17482e-06	-9.11061	1.21111e-06	2.97248e-07	8.52865	0.00211589	0.000386206	8.2211	0.00480796	0.00296306	8.6279	0.000461567	2.43178e-05	9.08135	4.98373e-06	9.70592e-07	0.649569	0.513014	0.274186	-8.2211	0.00304233	0.00162404	-9.08135	6.59592e-05	2.83528e-06	8.74886	0.00102474	0.000107015
C10090_4201	mmu_circ_0002664	mmu_circ_0002664	-0.390481	0.559973	0.360978	1.14152	0.00254	0.00142559	0.446083	0.474972	0.262596	2.14412	6.32061e-09	1.12088e-09	0.43472	0.161506	0.052868	0.517496	0.0406241	0.0258252	0.223218	0.564485	0.31431	0.103664	0.709159	0.637146	-0.649733	0.0245305	0.00724792	-0.375081	0.231654	0.0932734
C10090_9880	mmu_circ_0002665	mmu_circ_0002665	-1.00409	0.000609487	6.88262e-05	0.243481	0.633878	0.578594	0.155209	0.550932	0.327892	0.309012	0.390561	0.328518	0.186935	0.532976	0.2808	0.0741925	0.758046	0.695886	0.193831	0.590328	0.336344	0.72654	0.00012055	3.86414e-05	0.524593	0.0089197	0.0024585	-0.103768	0.677262	0.45518
C10090_14452	mmu_circ_0002666	mmu_circ_0002666	-0.832149	0.00203992	0.000406128	0.454096	0.107044	0.079322	0.0259247	0.838062	0.670636	0.368422	0.211413	0.16527	0.0970392	0.77282	0.537518	0.256624	0.15506	0.110939	0.0370262	0.964584	0.91563	0.60429	0.000467075	0.000181899	0.304537	0.119792	0.0445614	-0.042213	0.839694	0.695786
C10090_12048	mmu_circ_0002667	mmu_circ_0002667	NA	NA	NA	9.51491	5.06257e-07	1.15422e-07	NA	NA	NA	9.1472	4.23524e-05	1.43504e-05	-0.363641	0.633936	0.371274	-0.281531	0.592825	0.51225	0.604841	0.357584	0.156387	0.137041	0.821185	0.765998	0.0305933	0.974089	0.957754	-0.172849	0.853042	0.690156
C10090_585	mmu_circ_0002668	mmu_circ_0002668	-8.84737	0.000259308	1.90127e-05	1.10813	0.0342105	0.0236518	0.280644	0.762556	0.561414	1.23621	0.0312962	0.021415	-0.327788	0.603713	0.343834	-0.400149	0.356594	0.283638	0.20907	0.800239	0.592658	-0.125883	0.811094	0.755038	0.0712656	0.947041	0.87211	0.653531	0.202711	0.079087
C10090_94	mmu_circ_0002670	mmu_circ_0002670	NA	NA	NA	NA	NA	NA	NA	NA	NA	NA	NA	NA	8.08746	0.00429829	0.000678492	NA	NA	NA	NA	NA	NA	NA	NA	NA	NA	NA	NA	NA	NA	NA
C10090_9304	mmu_circ_0002671	mmu_circ_0002671	NA	NA	NA	NA	NA	NA	NA	NA	NA	8.9867	0.000126913	4.69118e-05	NA	NA	NA	8.7187	7.53547e-05	2.07156e-05	-0.0421297	0.957997	0.883766	-0.628264	0.358454	0.282614	-8.7187	0.000555581	4.82886e-05	0.670303	0.48035	0.26135
C10090_13208	mmu_circ_0002672	mmu_circ_0002672	8.30469	0.00326451	0.000689242	8.40812	0.00124881	0.00064042	NA	NA	NA	8.9867	0.000124614	4.69118e-05	0.541709	0.554634	0.29878	0.895663	0.111091	0.0770216	0.159746	0.905588	0.77811	-0.49084	0.473147	0.390494	-0.344648	0.662518	0.461134	1.14602	0.0793202	0.0258978
C10090_2490	mmu_circ_0002673	mmu_circ_0002673	-8.26256	0.00291588	0.000705366	0.532501	0.570898	0.511032	NA	NA	NA	9.85331	5.82816e-08	1.17589e-08	-0.466839	0.643929	0.382518	0.438314	0.434991	0.358836	-0.372519	0.537212	0.291158	-1.11657	0.0266368	0.016331	0.16194	0.861565	0.72767	0.789563	0.277619	0.119176
C10090_3345	mmu_circ_0002677	mmu_circ_0002677	NA	NA	NA	8.7077	0.000274113	0.00011419	NA	NA	NA	9.2211	2.49473e-05	7.93702e-06	-0.494843	0.634475	0.372108	-8.7077	0.000153468	4.78212e-05	-1.13895	0.0960051	0.0295354	-9.2211	1.13133e-05	2.51832e-06	NA	NA	NA	NA	NA	NA
C10090_3014	mmu_circ_0002679	mmu_circ_0002679	NA	NA	NA	9.56567	2.94486e-07	6.49646e-08	NA	NA	NA	9.35865	8.32836e-06	2.42796e-06	-0.615847	0.340052	0.141243	-9.56567	1.05424e-07	1.3983e-08	0.756002	0.143462	0.0477008	-9.35865	3.60739e-06	6.90582e-07	NA	NA	NA	NA	NA	NA
C10090_11732	mmu_circ_0002681	mmu_circ_0002681	-0.095262	0.874325	0.76249	1.00487	0.000342267	0.000146726	0.32799	0.354015	0.170211	1.0842	0.000191608	7.56316e-05	0.2853	0.260331	0.0976042	0.271498	0.185956	0.135979	-0.173314	0.571011	0.31854	-0.0177921	0.950711	0.931362	-0.533967	0.0193668	0.00559414	-0.0655525	0.850275	0.69373
C10090_3484	mmu_circ_0002690	mmu_circ_0002690	-8.64097	0.000662679	8.06848e-05	-0.0266261	0.791485	0.753316	8.26538	0.0053615	0.00143958	NA	NA	NA	-8.61434	0.000406813	1.94393e-05	1.72339	7.85372e-05	2.2154e-05	8.32328	0.00321736	0.000473734	9.35821	1.92787e-06	3.4454e-07	-0.822034	0.063371	0.0211486	0.44107	0.544904	0.315484
C10090_10384	mmu_circ_0002691	mmu_circ_0002691	-0.560865	0.142649	0.0591286	0.432608	0.267595	0.217074	-0.314739	0.657642	0.441356	0.186098	0.815418	0.775948	-0.4335	0.166761	0.0554394	1.07262	3.86455e-08	4.7376e-09	0.476561	0.182366	0.0639882	1.63972	2.89493e-13	1.66319e-14	-0.165221	0.494319	0.29024	0.0822594	0.848032	0.677506
C10090_12832	mmu_circ_0002692	mmu_circ_0002692	NA	NA	NA	NA	NA	NA	NA	NA	NA	NA	NA	NA	NA	NA	NA	9.15937	2.44749e-06	4.51566e-07	NA	NA	NA	8.49586	0.000650798	0.000272902	-9.15937	3.93952e-05	1.39567e-06	-8.49586	0.00200441	0.00030619
C10090_3590	mmu_circ_0002693	mmu_circ_0002693	0.33772	0.619214	0.419216	0.351961	0.668934	0.615946	0.75922	0.105467	0.0371512	0.274163	0.741254	0.691348	0.794653	0.0522159	0.0140429	1.86677	2.51335e-10	2.14856e-11	0.238216	0.769226	0.548644	1.57775	9.29701e-07	1.54523e-07	0.184885	0.585118	0.373956	0.0494687	0.947256	0.884284
C10090_1871	mmu_circ_0002702	mmu_circ_0002702	-8.64097	0.00068217	8.06848e-05	1.45904	0.00388885	0.00232868	-9.01737	0.000261098	1.69997e-05	1.01109	0.0530843	0.037305	-0.186817	0.785829	0.559564	-1.48824	0.00121598	0.000547666	0.452231	0.36788	0.162119	-0.599889	0.183614	0.132543	0.507957	0.549678	0.339492	-0.1653	0.852766	0.687118
C10090_12922	mmu_circ_0002703	mmu_circ_0002703	NA	NA	NA	8.02956	0.00573848	0.0035917	NA	NA	NA	NA	NA	NA	-8.02956	0.00380398	0.000716208	-8.02956	0.00377871	0.00204506	NA	NA	NA	NA	NA	NA	NA	NA	NA	NA	NA	NA
C10090_2930	mmu_circ_0002706	mmu_circ_0002706	-0.957871	0.178988	0.0779748	2.50036	3.6917e-15	3.6364e-16	-1.09962	0.136564	0.0504232	1.87224	9.83586e-08	2.06672e-08	0.103275	0.781847	0.550662	-0.829084	0.000276116	9.7699e-05	0.0552101	0.945594	0.86403	-0.783915	0.00394726	0.00217656	-0.0397025	0.936116	0.858954	0.281175	0.57467	0.345588
C10090_9747	mmu_circ_0002707	mmu_circ_0002707	0.294652	0.595246	0.394866	2.90898	7.61408e-34	2.79688e-35	-0.452061	0.469627	0.258334	2.10333	2.4134e-18	1.81071e-19	0.0596975	0.825295	0.635192	-0.75175	3.3097e-06	6.28966e-07	-0.0949698	0.672795	0.423518	-0.64257	0.000352866	0.000135925	0.0348389	0.941783	0.866156	0.0155943	1.00065	0.999232
C10090_651	mmu_circ_0002708	mmu_circ_0002708	0.428482	0.556066	0.356376	2.77837	1.48619e-16	1.29924e-17	-0.553737	0.579104	0.358194	1.8305	3.87477e-06	1.06141e-06	-0.160316	0.637827	0.37746	-1.07949	8.58995e-06	1.79265e-06	0.133429	0.814015	0.621392	-0.670247	0.0290328	0.0179478	0.254795	0.562845	0.351878	-0.168881	0.768171	0.572054
C10090_6120	mmu_circ_0002709	mmu_circ_0002709	NA	NA	NA	9.99308	1.26102e-09	2.0728e-10	NA	NA	NA	9.80607	1.0003e-07	2.12606e-08	0.158317	0.824095	0.619796	-0.381133	0.37173	0.299106	0.571578	0.241813	0.0921696	-0.184747	0.718036	0.648166	0.0671812	0.950452	0.87772	-0.592584	0.379309	0.183932
C10090_7231	mmu_circ_0002710	mmu_circ_0002710	NA	NA	NA	8.40812	0.00123399	0.00064042	-8.56986	0.00201341	0.00031484	-8.56986	0.000300114	0.000126979	0.0269277	0.988467	0.96808	-8.40812	0.00074341	0.000312726	8.08215	0.00761212	0.00156122	NA	NA	NA	NA	NA	NA	NA	NA	NA
C10090_13265	mmu_circ_0002711	mmu_circ_0002711	0.259844	0.558716	0.35957	-0.167442	0.387106	0.326256	-0.488646	0.412366	0.213526	-1.07368	0.00305097	0.00177621	-0.713598	0.119381	0.0363238	-10.1994	9.1041e-12	6.2523e-13	-0.0353712	0.956367	0.88406	-1.00022	0.097856	0.06624	NA	NA	NA	0.042448	0.995835	0.974942
C10090_6093	mmu_circ_0002712	mmu_circ_0002712	NA	NA	NA	NA	NA	NA	NA	NA	NA	NA	NA	NA	NA	NA	NA	8.23362	0.000999425	0.00044214	8.08215	0.00777846	0.00156122	NA	NA	NA	-8.23362	0.00355683	0.000822422	NA	NA	NA
C10090_11126	mmu_circ_0002713	mmu_circ_0002713	-0.510364	0.371401	0.20036	0.548337	0.247073	0.198196	0.266198	0.661933	0.446814	0.55422	0.325461	0.267816	-0.30655	0.537298	0.284284	0.670422	0.0143074	0.00852346	0.636231	0.13016	0.0423808	1.21973	9.15518e-05	2.69978e-05	-0.702602	0.0244935	0.0072254	-0.431989	0.204321	0.0798114
C10090_3781	mmu_circ_0002714	mmu_circ_0002714	NA	NA	NA	NA	NA	NA	NA	NA	NA	NA	NA	NA	7.94953	0.00612259	0.00132029	8.37069	0.000528674	0.000205704	NA	NA	NA	NA	NA	NA	0.588445	0.507744	0.30256	NA	NA	NA
C10090_9891	mmu_circ_0002715	mmu_circ_0002715	0.777431	0.00120839	0.000164267	-0.85909	0.000500956	0.000233156	-0.0894206	0.942597	0.889094	-2.02528	1.36299e-14	1.3315e-15	-0.211075	0.73906	0.492304	2.18803	2.6995e-23	6.19812e-25	0.700224	0.0991261	0.0306612	2.45915	2.23588e-22	6.30426e-24	0.233887	0.254402	0.113441	0.272763	0.23474	0.095235
C10090_2690	mmu_circ_0002716	mmu_circ_0002716	0.0705547	0.815038	0.661496	-1.32356	1.19919e-09	1.95886e-10	-0.595998	0.0161637	0.00471328	-1.34447	7.41682e-11	1.06071e-11	0.294554	0.513222	0.262218	1.77088	1.08181e-15	4.87902e-17	0.245105	0.600974	0.346928	1.11369	1.98175e-06	3.5921e-07	-0.306343	0.164362	0.065605	-0.533862	0.0212147	0.00591132
C10090_7618	mmu_circ_0002717	mmu_circ_0002717	0.0892204	0.908983	0.818498	-0.885114	0.0519017	0.0367242	-0.373148	0.765872	0.57174	-9.01737	1.62938e-05	5.0656e-06	-8.51491	0.000608171	3.999e-05	0.981543	0.0620869	0.041124	NA	NA	NA	8.49586	0.000640119	0.000272902	-0.165313	0.833528	0.690604	0.767414	0.351867	0.167141
C10090_436	mmu_circ_0002718	mmu_circ_0002718	8.16742	0.00503069	0.00133945	NA	NA	NA	NA	NA	NA	NA	NA	NA	NA	NA	NA	8.23362	0.00102752	0.00044214	NA	NA	NA	8.62132	0.000352807	0.000129993	0.445509	0.671721	0.47103	0.0203712	1.00021	0.999262
C10090_6466	mmu_circ_0002719	mmu_circ_0002719	NA	NA	NA	NA	NA	NA	NA	NA	NA	NA	NA	NA	NA	NA	NA	NA	NA	NA	8.2075	0.00491958	0.000860002	NA	NA	NA	NA	NA	NA	NA	NA	NA
C10090_15685	mmu_circ_0002721	mmu_circ_0002721	NA	NA	NA	NA	NA	NA	NA	NA	NA	NA	NA	NA	NA	NA	NA	8.49625	0.000271736	9.57038e-05	NA	NA	NA	NA	NA	NA	-8.49625	0.00136531	0.000199283	NA	NA	NA
C10090_6087	mmu_circ_0002724	mmu_circ_0002724	0.252819	0.814853	0.662	0.477412	0.612159	0.556508	-0.304475	0.85107	0.701884	-8.56986	0.000300739	0.000126979	0.273833	0.783633	0.55528	-0.381183	0.571392	0.490802	8.43003	0.00221537	0.000260958	8.35843	0.00119103	0.000572918	0.697517	0.371106	0.191338	-8.35843	0.00319235	0.000636664
C10090_10618	mmu_circ_0002728	mmu_circ_0002728	NA	NA	NA	8.29278	0.00211224	0.00113783	8.52865	0.00218931	0.000386206	NA	NA	NA	0.142263	0.923206	0.811788	-8.29278	0.00127238	0.000584804	NA	NA	NA	NA	NA	NA	8.77873	0.000478994	3.903e-05	9.1114	0.000167286	7.76884e-06
C10090_839	mmu_circ_0002729	mmu_circ_0002729	0.720409	0.105418	0.0414112	2.39002	1.63902e-16	1.43956e-17	-0.373189	0.642247	0.422804	1.63683	1.03686e-07	2.21972e-08	-0.302254	0.215398	0.076711	-0.308057	0.122764	0.0859194	0.0561496	0.937844	0.844804	-1.33235	1.0835e-06	1.83531e-07	-0.863841	0.00108471	0.000129376	0.550434	0.18247	0.0697706
C10090_2140	mmu_circ_0002730	mmu_circ_0002730	NA	NA	NA	NA	NA	NA	NA	NA	NA	NA	NA	NA	NA	NA	NA	9.15937	2.46944e-06	4.51566e-07	NA	NA	NA	9.73674	3.21222e-08	4.02464e-09	-0.702807	0.361289	0.184484	-0.795399	0.19423	0.075137
C10090_6625	mmu_circ_0002731	mmu_circ_0002731	-0.095332	0.939937	0.88762	1.89253	0.000159851	6.16704e-05	0.592119	0.392026	0.19754	1.64289	0.000549804	0.000245204	0.0356744	0.957106	0.90629	-0.171666	0.661039	0.588674	-0.246039	0.617454	0.368306	-1.32992	0.00131785	0.000644256	-0.00116655	0.989828	0.983282	0.771713	0.207119	0.0811486
C10090_7752	mmu_circ_0002737	mmu_circ_0002737	NA	NA	NA	NA	NA	NA	NA	NA	NA	NA	NA	NA	8.21286	0.00228271	0.000348676	NA	NA	NA	7.94486	0.0115785	0.00283418	NA	NA	NA	NA	NA	NA	NA	NA	NA
C10090_13171	mmu_circ_0002740	mmu_circ_0002740	0.188528	0.784728	0.629966	1.58333	1.61907e-05	4.97716e-06	-0.0791341	0.986294	0.968182	2.12865	2.659e-08	5.07814e-09	-0.465511	0.165885	0.0550466	-0.205272	0.478708	0.399414	-0.276395	0.416751	0.192273	-0.648041	0.0219781	0.0133537	-0.298001	0.471993	0.268882	0.208401	0.711565	0.499538
C10090_3761	mmu_circ_0002744	mmu_circ_0002744	NA	NA	NA	NA	NA	NA	-8.69523	0.00114832	0.000151767	-8.69523	0.000147049	5.67488e-05	NA	NA	NA	NA	NA	NA	8.08215	0.00807246	0.00156122	NA	NA	NA	NA	NA	NA	NA	NA	NA
C10090_12512	mmu_circ_0002745	mmu_circ_0002745	NA	NA	NA	9.23122	7.08207e-06	2.04338e-06	NA	NA	NA	8.35843	0.00286478	0.00163882	0.203824	0.82417	0.62305	-9.23122	3.1775e-06	5.9798e-07	0.723718	0.416083	0.191356	-8.35843	0.00169622	0.000850448	NA	NA	NA	NA	NA	NA
C10090_45	mmu_circ_0002758	mmu_circ_0002758	-0.0952312	0.938796	0.878504	1.97356	1.20144e-05	3.58484e-06	-0.932573	0.289303	0.129357	0.401587	0.578269	0.514144	-0.89925	0.0132556	0.00315352	2.01118	4.53273e-24	9.57096e-26	0.637908	0.207653	0.0761568	3.39099	1.0901e-49	1.34038e-51	-0.564101	0.0015269	0.000226114	-0.754545	5.54573e-06	1.15046e-07
C10090_1506	mmu_circ_0002767	mmu_circ_0002767	0.31963	0.666815	0.469822	-0.595703	0.195697	0.153931	NA	NA	NA	8.89905	0.00021228	8.48184e-05	0.505235	0.575332	0.317214	-0.0186567	0.988949	0.984692	0.183094	0.888522	0.747672	0.660896	0.216549	0.159118	0.834886	0.246764	0.108229	-0.033647	0.95903	0.903188
C10090_14937	mmu_circ_0002769	mmu_circ_0002769	8.65284	0.00072658	9.3909e-05	NA	NA	NA	8.64422	0.00142362	0.000200036	NA	NA	NA	NA	NA	NA	NA	NA	NA	NA	NA	NA	NA	NA	NA	NA	NA	NA	NA	NA	NA
C10090_5271	mmu_circ_0002770	mmu_circ_0002770	8.65284	0.000740375	9.3909e-05	NA	NA	NA	9.19155	8.67592e-05	3.8624e-06	NA	NA	NA	NA	NA	NA	NA	NA	NA	NA	NA	NA	NA	NA	NA	NA	NA	NA	NA	NA	NA
C10090_3937	mmu_circ_0002772	mmu_circ_0002772	NA	NA	NA	NA	NA	NA	NA	NA	NA	NA	NA	NA	7.94953	0.00611679	0.00132029	NA	NA	NA	NA	NA	NA	NA	NA	NA	NA	NA	NA	NA	NA	NA
C10090_7402	mmu_circ_0002776	mmu_circ_0002776	NA	NA	NA	8.02956	0.00565322	0.0035917	NA	NA	NA	NA	NA	NA	-8.02956	0.00369186	0.000716208	-8.02956	0.00372788	0.00204506	NA	NA	NA	NA	NA	NA	NA	NA	NA	NA	NA	NA
C10090_15769	mmu_circ_0002777	mmu_circ_0002777	8.84549	0.000279047	2.48656e-05	NA	NA	NA	8.40301	0.00321321	0.000745636	NA	NA	NA	NA	NA	NA	NA	NA	NA	NA	NA	NA	NA	NA	NA	NA	NA	NA	NA	NA	NA
C10090_5400	mmu_circ_0002779	mmu_circ_0002779	NA	NA	NA	NA	NA	NA	NA	NA	NA	NA	NA	NA	8.32823	0.00153134	0.000179183	NA	NA	NA	8.79279	0.000465774	2.4028e-05	NA	NA	NA	NA	NA	NA	NA	NA	NA
C10090_15187	mmu_circ_0002781	mmu_circ_0002781	0.18478	0.770587	0.600674	-9.74803	4.89672e-10	7.5767e-11	-8.69523	0.00117554	0.000151767	-8.69523	0.000145637	5.67488e-05	NA	NA	NA	NA	NA	NA	NA	NA	NA	NA	NA	NA	NA	NA	NA	NA	NA	NA
C10090_13474	mmu_circ_0002783	mmu_circ_0002783	NA	NA	NA	9.61453	1.72156e-07	3.6565e-08	NA	NA	NA	9.85331	5.79655e-08	1.17589e-08	0.405621	0.489644	0.242672	-9.61453	5.92127e-08	7.47746e-09	-0.53003	0.350625	0.151	-0.23199	0.638757	0.561976	8.33136	0.00286113	0.000587228	-0.509923	0.457644	0.243602
C10090_2813	mmu_circ_0002784	mmu_circ_0002784	NA	NA	NA	10.0296	7.39294e-10	1.16667e-10	NA	NA	NA	10.1471	1.16228e-09	1.8617e-10	0.152831	0.82471	0.628006	-0.658658	0.119544	0.0834944	-0.0007636	0.975049	0.94104	0.0185831	0.965296	0.951994	-0.914346	0.180339	0.0735158	-1.05426	0.0311572	0.00907834
C10090_3123	mmu_circ_0002786	mmu_circ_0002786	NA	NA	NA	NA	NA	NA	8.94369	0.000376979	2.77962e-05	NA	NA	NA	8.79766	0.000192939	6.42212e-06	9.08135	5.00481e-06	9.70592e-07	9.43003	6.03997e-06	6.18126e-08	9.03645	2.68663e-05	6.69238e-06	-0.0396911	0.969984	0.924394	0.364431	0.693102	0.470728
C10090_9555	mmu_circ_0002788	mmu_circ_0002788	NA	NA	NA	8.16692	0.00353592	0.00202156	NA	NA	NA	8.59954	0.00100066	0.00050132	0.630745	0.511733	0.259576	1.38844	0.0103276	0.006017	-0.517392	0.611924	0.36079	1.24407	0.013936	0.00826056	-0.435637	0.525846	0.318066	-0.0443254	0.938224	0.872314
C10090_12473	mmu_circ_0002790	mmu_circ_0002790	0.0682626	0.888517	0.781286	0.72305	0.0257677	0.0175239	-0.398071	0.457429	0.247042	0.815222	0.00390686	0.00229598	-0.304727	0.36571	0.157053	-1.00376	0.000275477	9.74166e-05	-0.212224	0.462336	0.22943	-1.02944	6.15734e-05	1.78572e-05	0.211821	0.69348	0.49677	-0.0372622	0.936951	0.852798
C10090_2744	mmu_circ_0002792	mmu_circ_0002792	NA	NA	NA	NA	NA	NA	NA	NA	NA	NA	NA	NA	NA	NA	NA	NA	NA	NA	8.52982	0.00145206	0.00014375	NA	NA	NA	NA	NA	NA	NA	NA	NA
C10090_11523	mmu_circ_0002793	mmu_circ_0002793	NA	NA	NA	8.7077	0.000273843	0.00011419	NA	NA	NA	NA	NA	NA	-8.7077	0.00025149	9.4495e-06	-8.7077	0.000153267	4.78212e-05	8.32328	0.00322193	0.000473734	NA	NA	NA	NA	NA	NA	NA	NA	NA
C10090_6757	mmu_circ_0002796	mmu_circ_0002796	NA	NA	NA	NA	NA	NA	NA	NA	NA	NA	NA	NA	NA	NA	NA	NA	NA	NA	NA	NA	NA	8.49586	0.000642355	0.000272902	8.45656	0.00179068	0.000298164	-8.49586	0.00195317	0.00030619
C10090_6962	mmu_circ_0002800	mmu_circ_0002800	NA	NA	NA	11.4356	7.50814e-26	3.91354e-27	8.64422	0.00142081	0.000200036	11.5857	7.0032e-26	3.55938e-27	-0.135385	0.742028	0.49716	-1.82362	1.6109e-09	1.54551e-10	0.0143855	0.989856	0.977452	-2.22746	4.82028e-12	3.31094e-13	-0.280806	0.69358	0.496678	-0.0949424	0.917905	0.805818
C10090_12264	mmu_circ_0002801	mmu_circ_0002801	NA	NA	NA	9.23122	7.08711e-06	2.04338e-06	NA	NA	NA	9.59954	9.28619e-07	2.272e-07	-0.144024	0.881156	0.736306	-0.0718544	0.906521	0.880132	-0.169507	0.815743	0.624074	-9.59954	3.39744e-07	5.19304e-08	-0.200234	0.820795	0.6723	8.84831	0.000636857	5.55486e-05
C10090_1410	mmu_circ_0002810	mmu_circ_0002810	0.464077	0.463886	0.2721	-9.18859	5.63358e-07	1.29943e-07	NA	NA	NA	8.2211	0.00490426	0.00296306	NA	NA	NA	NA	NA	NA	0.102176	0.968784	0.914558	-8.2211	0.00309895	0.00162404	NA	NA	NA	NA	NA	NA
C10090_8288	mmu_circ_0002811	mmu_circ_0002811	0.649604	0.0712608	0.0263724	-0.857449	0.0121789	0.0080251	-0.404935	0.491988	0.276384	-1.56495	3.61025e-05	1.20342e-05	-0.0799337	0.937809	0.844928	-9.29255	1.82866e-06	3.19772e-07	0.254233	0.810586	0.611156	-9.06905	3.542e-05	9.18352e-06	NA	NA	NA	NA	NA	NA
C10090_12268	mmu_circ_0002815	mmu_circ_0002815	8.16742	0.00506121	0.00133945	NA	NA	NA	NA	NA	NA	NA	NA	NA	NA	NA	NA	NA	NA	NA	NA	NA	NA	NA	NA	NA	NA	NA	NA	NA	NA	NA
C10090_1855	mmu_circ_0002817	mmu_circ_0002817	NA	NA	NA	8.16692	0.00352832	0.00202156	NA	NA	NA	8.70667	0.000614133	0.000277272	0.0459449	0.980768	0.947522	3.29911	5.34286e-19	1.69771e-20	0.0861216	0.966969	0.915268	2.57758	6.67515e-12	4.69822e-13	-0.528137	0.060794	0.0202168	-0.298475	0.395678	0.195973
C10090_6233	mmu_circ_0002819	mmu_circ_0002819	0.538654	0.234947	0.10952	0.432587	0.452819	0.390002	-0.135037	0.906992	0.809328	0.0783004	0.948939	0.939544	0.254508	0.637779	0.375478	0.203824	0.58162	0.501018	-0.38534	0.348301	0.148763	-0.786172	0.0263046	0.0161218	0.294746	0.517129	0.311328	0.631941	0.179692	0.0681998
C10090_5008	mmu_circ_0002820	mmu_circ_0002820	0.306867	0.390386	0.21478	0.419101	0.303235	0.248288	-0.359359	0.438175	0.233596	0.0782895	0.942869	0.928762	-0.272451	0.466922	0.225404	0.0298062	0.922892	0.899432	-0.228026	0.490669	0.251688	-0.368067	0.17223	0.123815	0.289635	0.375811	0.194296	0.343185	0.365238	0.175559
C10090_10858	mmu_circ_0002822	mmu_circ_0002822	NA	NA	NA	NA	NA	NA	-0.844972	0.3666	0.179118	-9.11035	7.92714e-06	2.2639e-06	NA	NA	NA	NA	NA	NA	8.94457	0.000205349	7.29102e-06	8.62132	0.000347804	0.000129993	NA	NA	NA	-8.62132	0.00125433	0.000147255
C10090_10795	mmu_circ_0002824	mmu_circ_0002824	-0.0951944	0.920868	0.840782	0.491367	0.41836	0.356718	0.38066	0.433222	0.22975	0.895603	0.0263986	0.017872	0.759771	0.0333223	0.0085058	-1.13724	0.0127892	0.00756132	-0.355778	0.388931	0.174483	-1.42225	0.000245101	8.62038e-05	1.57706	0.000893737	9.54108e-05	0.701454	0.240135	0.0981034
C10090_1772	mmu_circ_0002825	mmu_circ_0002825	8.30469	0.00324395	0.000689242	NA	NA	NA	NA	NA	NA	NA	NA	NA	NA	NA	NA	NA	NA	NA	NA	NA	NA	NA	NA	NA	NA	NA	NA	NA	NA	NA
C10090_7484	mmu_circ_0002827	mmu_circ_0002827	NA	NA	NA	8.29278	0.00205585	0.00113783	NA	NA	NA	NA	NA	NA	-8.29278	0.0015433	0.000169237	-8.29278	0.00124083	0.000584804	NA	NA	NA	NA	NA	NA	NA	NA	NA	NA	NA	NA
C10090_14240	mmu_circ_0002828	mmu_circ_0002828	0.0276088	0.94557	0.900278	0.845024	0.00848114	0.00551544	0.35789	0.219568	0.0904788	-0.113439	0.491283	0.425454	0.118501	0.787137	0.562264	-1.50795	7.39897e-07	1.19221e-07	0.132726	0.82795	0.648284	-0.839352	0.012398	0.0073016	0.146671	0.844813	0.703944	0.236244	0.741131	0.530602
C10090_5195	mmu_circ_0002829	mmu_circ_0002829	8.54574	0.00117587	0.0001825	NA	NA	NA	NA	NA	NA	NA	NA	NA	8.43505	0.00103423	9.20818e-05	NA	NA	NA	7.94486	0.0120409	0.00283418	NA	NA	NA	NA	NA	NA	NA	NA	NA
C10090_937	mmu_circ_0002832	mmu_circ_0002832	0.0603291	0.841157	0.692598	-0.80042	1.35828e-05	4.15316e-06	-0.275239	0.433746	0.23039	-0.997823	1.63575e-07	3.52704e-08	-0.0798663	0.885109	0.719004	1.56349	2.28979e-17	8.4494e-19	-0.0133573	0.95655	0.877836	1.64177	2.32401e-19	7.68594e-21	-0.227507	0.245636	0.107618	-0.351636	0.0327236	0.00957332
C10090_10098	mmu_circ_0002833	mmu_circ_0002833	-0.0462558	0.942218	0.892296	-0.258037	0.186974	0.145689	-0.267984	0.662005	0.447968	-0.845931	0.00261698	0.00146079	-0.742854	0.0541619	0.0145884	0.89453	0.000519941	0.000199002	0.0302172	0.992261	0.98107	1.82	2.56638e-12	1.68118e-13	-0.0397252	0.917815	0.83284	-0.582784	0.0110484	0.00295354
C10090_15382	mmu_circ_0002834	mmu_circ_0002834	-0.27889	0.400924	0.222938	0.243481	0.633735	0.578594	0.113357	0.629228	0.409156	0.190842	0.712352	0.658122	0.223932	0.42297	0.193217	0.811183	3.26298e-06	6.18748e-07	-0.0935218	0.769088	0.547742	1.18825	2.60605e-12	1.71269e-13	0.140883	0.548706	0.338632	-0.363021	0.0255227	0.00728618
C10090_13574	mmu_circ_0002836	mmu_circ_0002836	8.16742	0.00485974	0.00133945	8.7077	0.000271174	0.00011419	NA	NA	NA	8.70667	0.000600668	0.000277272	0.0899573	0.946568	0.863644	-8.7077	0.00015187	4.78212e-05	-0.0838847	0.931934	0.830916	-8.70667	0.000336091	0.000122124	NA	NA	NA	NA	NA	NA
C10090_6599	mmu_circ_0002837	mmu_circ_0002837	NA	NA	NA	NA	NA	NA	NA	NA	NA	9.48402	2.78519e-06	7.42718e-07	8.6279	0.000444344	2.43178e-05	9.23338	1.22586e-06	2.1009e-07	0.30861	0.701355	0.45717	1.50651	1.99914e-05	4.7425e-06	0.338752	0.647924	0.442406	-1.72726	1.58637e-05	4.30062e-07
C10090_11956	mmu_circ_0002838	mmu_circ_0002838	NA	NA	NA	NA	NA	NA	NA	NA	NA	8.70667	0.000607033	0.000277272	NA	NA	NA	8.91139	1.902e-05	4.48402e-06	0.723366	0.328783	0.137405	1.49961	0.00115911	0.000537414	-0.232264	0.812755	0.656116	-1.67998	0.0013143	0.000169477
C10090_4950	mmu_circ_0002839	mmu_circ_0002839	0.978704	0.0355	0.0120075	3.11895	1.05043e-27	4.91478e-29	0.675748	0.0759247	0.0257096	2.58181	2.23728e-24	1.22078e-25	0.239087	0.234811	0.0859262	0.534651	0.000335364	0.000119694	0.217225	0.325044	0.135299	0.685806	9.63465e-07	1.60339e-07	-0.341053	0.0384069	0.0119647	-0.506718	0.000534982	4.41404e-05
C10090_8989	mmu_circ_0002840	mmu_circ_0002840	0.479029	0.00194285	0.000385242	-3.91753	2.20432e-46	5.02112e-48	-0.0418694	0.942855	0.889862	-12.578	5.80937e-61	1.09924e-62	-0.427448	0.720739	0.465382	-8.51491	0.000458287	0.000167231	8.71012	0.000730244	4.36194e-05	NA	NA	NA	NA	NA	NA	NA	NA	NA
C10090_10998	mmu_circ_0002842	mmu_circ_0002842	-0.758185	4.21314e-06	1.01467e-07	-4.58776	8.0719e-76	1.04357e-77	1.75383	1.39785e-45	1.55576e-48	-2.58559	2.87372e-24	1.57438e-25	1.17384	0.0431552	0.0113682	0.310587	0.651792	0.575496	0.553648	0.304526	0.124087	-9.6541	1.8781e-07	2.7194e-08	-8.7187	0.00054376	4.82886e-05	8.40088	0.00357476	0.000765178
C10090_1504	mmu_circ_0002843	mmu_circ_0002843	8.30469	0.00325625	0.000689242	NA	NA	NA	8.8505	0.000579197	5.36652e-05	NA	NA	NA	NA	NA	NA	NA	NA	NA	NA	NA	NA	NA	NA	NA	NA	NA	NA	NA	NA	NA
C10090_5497	mmu_circ_0002844	mmu_circ_0002844	0.904808	0.123618	0.0500162	-8.74786	2.52944e-05	8.13904e-06	0.88048	0.100616	0.0350226	-9.01737	1.63517e-05	5.0656e-06	NA	NA	NA	NA	NA	NA	NA	NA	NA	NA	NA	NA	NA	NA	NA	NA	NA	NA
C10090_7257	mmu_circ_0002846	mmu_circ_0002846	-0.159343	0.560064	0.361636	-3.39408	3.37696e-37	1.088e-38	2.1389	1.32157e-48	1.10315e-51	-11.5861	1.64577e-30	6.62654e-32	0.142709	0.893905	0.766674	-8.87744	5.08433e-05	1.36749e-05	9.83226	6.28251e-08	2.8867e-10	NA	NA	NA	NA	NA	NA	NA	NA	NA
C10090_5522	mmu_circ_0002848	mmu_circ_0002848	NA	NA	NA	NA	NA	NA	NA	NA	NA	NA	NA	NA	NA	NA	NA	NA	NA	NA	NA	NA	NA	8.49586	0.000647525	0.000272902	NA	NA	NA	-8.49586	0.00199211	0.00030619
C10090_12499	mmu_circ_0002849	mmu_circ_0002849	NA	NA	NA	NA	NA	NA	NA	NA	NA	NA	NA	NA	NA	NA	NA	NA	NA	NA	NA	NA	NA	8.84361	9.75658e-05	2.94952e-05	NA	NA	NA	-8.84361	0.000435173	3.40588e-05
C10090_2582	mmu_circ_0002850	mmu_circ_0002850	0.352188	0.724477	0.537784	-8.40003	0.000241232	9.74236e-05	NA	NA	NA	NA	NA	NA	NA	NA	NA	8.61176	0.000147553	4.4526e-05	8.43003	0.00235305	0.000260958	9.12386	1.38845e-05	3.18782e-06	-0.0396308	0.970526	0.935226	-0.374999	0.676381	0.455226
C10090_4543	mmu_circ_0002852	mmu_circ_0002852	NA	NA	NA	NA	NA	NA	NA	NA	NA	8.35843	0.00285928	0.00163882	NA	NA	NA	NA	NA	NA	-0.150929	0.898184	0.763306	-8.35843	0.00169336	0.000850448	NA	NA	NA	NA	NA	NA
C10090_6140	mmu_circ_0002854	mmu_circ_0002854	0.641897	0.396122	0.21942	0.882597	0.178812	0.138741	-0.681459	0.419672	0.219528	0.420976	0.512549	0.446352	0.389544	0.55521	0.29841	-1.1745	0.0385968	0.0244652	0.0914025	0.938439	0.845732	-1.49488	0.00475343	0.00264326	-8.23362	0.0035532	0.000822422	-0.0949275	0.933722	0.859544
C10090_13296	mmu_circ_0002855	mmu_circ_0002855	0.114268	0.865746	0.724428	0.321605	0.634273	0.579866	-0.120921	0.932278	0.870022	0.326421	0.569521	0.506116	0.453063	0.260948	0.0979954	-1.26334	0.00235823	0.00121006	0.162505	0.815673	0.620954	-0.599866	0.125743	0.0869568	-8.99887	0.000111867	5.7598e-06	-1.39028	0.0169209	0.00463908
C10090_6671	mmu_circ_0002861	mmu_circ_0002861	-0.512772	1.97784e-06	4.33992e-08	-4.58807	2.92948e-163	1.32256e-165	0.656398	1.93149e-07	1.66601e-09	-4.6772	6.88397e-62	1.27228e-63	-9.51491	2.44097e-07	1.64493e-09	-0.796207	0.127703	0.0898474	-8.2211	0.00220059	0.000300122	0.400216	0.601571	0.518802	-8.7187	0.000528305	4.82886e-05	-8.62132	0.00118306	0.000147255
C10090_5025	mmu_circ_0002863	mmu_circ_0002863	0.247656	0.595073	0.394274	0.917235	0.0052311	0.00315498	-0.166723	0.850698	0.717436	0.845368	0.00363876	0.00213202	0.331242	0.261818	0.0983754	-1.17471	6.78693e-05	1.85047e-05	-0.4377	0.0880381	0.0265144	-1.31534	2.17495e-06	4.04834e-07	0.385669	0.434618	0.239276	0.211709	0.749862	0.537914
C10090_15814	mmu_circ_0002864	mmu_circ_0002864	NA	NA	NA	NA	NA	NA	NA	NA	NA	NA	NA	NA	NA	NA	NA	NA	NA	NA	7.94486	0.011549	0.00283418	NA	NA	NA	NA	NA	NA	NA	NA	NA
C10090_6594	mmu_circ_0002865	mmu_circ_0002865	NA	NA	NA	8.29278	0.00206735	0.00113783	NA	NA	NA	8.48422	0.00166382	0.000906406	-8.29278	0.00156664	0.000169237	-8.29278	0.00124843	0.000584804	-0.160939	0.88612	0.74195	-8.48422	0.000980264	0.000445348	NA	NA	NA	NA	NA	NA
C10090_14059	mmu_circ_0002866	mmu_circ_0002866	NA	NA	NA	NA	NA	NA	NA	NA	NA	NA	NA	NA	NA	NA	NA	NA	NA	NA	7.94486	0.0118619	0.00283418	NA	NA	NA	NA	NA	NA	NA	NA	NA
C10090_4885	mmu_circ_0002867	mmu_circ_0002867	NA	NA	NA	NA	NA	NA	NA	NA	NA	NA	NA	NA	8.43505	0.001039	9.20818e-05	NA	NA	NA	7.94486	0.0121161	0.00283418	NA	NA	NA	NA	NA	NA	NA	NA	NA
C10090_2913	mmu_circ_0002868	mmu_circ_0002868	8.54574	0.00115203	0.0001825	8.16692	0.00350696	0.00202156	NA	NA	NA	9.2211	2.50338e-05	7.93702e-06	0.367581	0.769463	0.53314	0.329338	0.658237	0.58375	-0.205967	0.810546	0.609602	0.137108	0.815846	0.760326	-0.16489	0.899415	0.779394	-9.35821	1.62513e-05	4.21414e-07
C10090_13139	mmu_circ_0002869	mmu_circ_0002869	-0.205681	0.142604	0.0590716	0.543162	1.28459e-05	3.92522e-06	0.0309585	0.64117	0.421738	1.06351	6.43334e-22	4.0058e-23	0.180766	0.0545807	0.0147235	0.023259	0.839928	0.797398	0.0421988	0.888032	0.745962	0.360766	6.56766e-06	1.36588e-06	-0.270701	0.00483231	0.00128397	-0.424496	4.584e-07	7.1321e-09
C10090_5128	mmu_circ_0002870	mmu_circ_0002870	-1.05672	0.0266202	0.00878318	-1.53566	0.000175506	6.9943e-05	-0.707341	0.24868	0.105866	-1.2113	0.00392847	0.00230954	0.92035	0.132594	0.041346	0.467009	0.433131	0.356414	0.367498	0.708116	0.465274	1.45916	0.000800506	0.000345862	0.877927	0.100438	0.03582	0.0750608	0.935574	0.85397
C10090_7479	mmu_circ_0002872	mmu_circ_0002872	-0.417075	0.604624	0.403676	0.730515	0.172478	0.133438	-1.48858	0.00915998	0.00256398	-0.533209	0.144243	0.109206	-0.236023	0.733345	0.482058	1.84911	7.82104e-13	4.53742e-14	0.34824	0.643003	0.393618	2.51809	1.23414e-18	4.42166e-20	-0.800466	0.00113891	0.000136378	0.305573	0.22441	0.089563
C10090_6903	mmu_circ_0002874	mmu_circ_0002874	-0.24114	0.627875	0.42844	-0.233047	0.243434	0.194927	-0.331129	0.524033	0.303426	0.351361	0.333766	0.275238	0.467661	0.203801	0.0714574	1.17587	4.69947e-06	9.02706e-07	0.127322	0.790558	0.582186	0.482964	0.0228758	0.0139185	-0.502665	0.0620012	0.0206622	-0.486544	0.0376014	0.0112042
C10090_181	mmu_circ_0002877	mmu_circ_0002877	-0.116577	0.657362	0.461402	-2.513	2.62147e-35	9.14528e-37	-0.467051	0.0659164	0.0218254	-3.43052	1.23344e-33	4.31502e-35	-0.771779	0.102474	0.0305098	-1.10113	0.0104655	0.00612954	0.677807	0.333419	0.139691	-0.540623	0.445646	0.363546	-0.667508	0.426246	0.23064	-8.35843	0.00348931	0.000636664
C10090_10268	mmu_circ_0002878	mmu_circ_0002878	0.270454	0.277227	0.135683	-3.61145	1.77019e-25	9.48124e-27	0.373831	0.152522	0.057758	-2.6706	2.90042e-12	3.58644e-13	1.05763	0.157793	0.0513624	-8.02956	0.00384424	0.00204506	0.945816	0.173397	0.060008	-0.125787	0.889522	0.852184	NA	NA	NA	-8.35843	0.00338437	0.000636664
C10090_6882	mmu_circ_0002880	mmu_circ_0002880	NA	NA	NA	NA	NA	NA	NA	NA	NA	8.35843	0.00283103	0.00163882	7.94953	0.00590452	0.00132029	NA	NA	NA	-8.35843	0.00146022	0.000134799	-8.35843	0.00167778	0.000850448	NA	NA	NA	NA	NA	NA
C10090_232	mmu_circ_0002886	mmu_circ_0002886	0.411696	0.531758	0.333398	-0.0214216	0.76284	0.719164	-0.351207	0.705567	0.494918	-0.211188	0.51091	0.444812	0.104529	0.923841	0.811214	-9.16717	5.60037e-06	1.11824e-06	-0.219752	0.768997	0.54832	-9.54303	6.18748e-07	9.91676e-08	NA	NA	NA	NA	NA	NA
C10090_9200	mmu_circ_0002887	mmu_circ_0002887	-0.220599	0.786336	0.62263	-0.17414	0.512617	0.450026	-0.407881	0.629616	0.410284	-0.326876	0.35646	0.29654	0.446281	0.486505	0.238136	-9.35138	1.04266e-06	1.70998e-07	-0.0539829	0.937857	0.844424	-1.12559	0.0533972	0.0343454	NA	NA	NA	0.283259	0.846362	0.67278
C10090_13636	mmu_circ_0002888	mmu_circ_0002888	NA	NA	NA	8.29278	0.0020782	0.00113783	8.52865	0.00226801	0.000386206	NA	NA	NA	0.0354444	0.985385	0.95822	-8.29278	0.00125282	0.000584804	8.2075	0.00499114	0.000860002	NA	NA	NA	NA	NA	NA	NA	NA	NA
C10090_10044	mmu_circ_0002890	mmu_circ_0002890	0.4216	0.150209	0.0631464	0.359354	0.390753	0.32965	-0.166713	0.846057	0.685038	-0.0800037	0.542215	0.478032	0.138338	0.737957	0.489912	0.759061	0.000164966	5.2858e-05	0.273287	0.503705	0.26111	1.52852	4.164e-14	2.14512e-15	-0.255431	0.298196	0.140506	-0.0791013	0.742706	0.53208
C10090_15740	mmu_circ_0002892	mmu_circ_0002892	-1.07256	0.00252454	0.00051342	0.281594	0.594238	0.536192	-0.00448151	0.930557	0.85314	0.839342	0.00830268	0.00534696	0.0281878	0.951982	0.89755	-1.2881	1.97799e-05	4.74832e-06	0.00858832	0.978677	0.955988	-0.605335	0.025763	0.015768	-0.0854792	0.896276	0.803134	-0.937459	0.0137975	0.00374374
C10090_12658	mmu_circ_0002894	mmu_circ_0002894	-1.3581	0.0309436	0.010309	0.429984	0.503686	0.441462	-0.067171	0.995031	0.987002	1.78883	5.4287e-05	1.87407e-05	0.672303	0.0770149	0.0218762	-0.956632	0.0324477	0.0202948	-0.0837121	0.856553	0.692148	-0.915333	0.00984141	0.00571874	-8.99887	0.000112903	5.7598e-06	-0.326209	0.639168	0.404716
C10090_2424	mmu_circ_0002896	mmu_circ_0002896	NA	NA	NA	NA	NA	NA	NA	NA	NA	8.2211	0.0048688	0.00296306	NA	NA	NA	NA	NA	NA	-8.2211	0.00235958	0.000300122	-8.2211	0.00308026	0.00162404	8.19377	0.00474033	0.00115653	8.74886	0.00103881	0.000107015
C10090_12329	mmu_circ_0002898	mmu_circ_0002898	NA	NA	NA	8.02956	0.00576874	0.0035917	NA	NA	NA	8.70667	0.000604993	0.000277272	-8.02956	0.00383728	0.000716208	-8.02956	0.00379308	0.00204506	-0.62452	0.507742	0.266172	-8.70667	0.00033747	0.000122124	8.33136	0.00290458	0.000587228	NA	NA	NA
C10090_5427	mmu_circ_0002899	mmu_circ_0002899	-9.40003	4.75033e-06	1.2076e-07	0.2145	0.883007	0.857638	-0.0844721	0.98476	0.959552	0.0231499	0.888601	0.861816	-0.463256	0.496129	0.247102	-0.118071	0.819797	0.77106	0.0454486	0.983983	0.966104	0.985178	0.0212371	0.0128674	1.01915	0.0133171	0.00376804	-0.310707	0.588823	0.356736
C10090_7284	mmu_circ_0002901	mmu_circ_0002901	-0.0310826	0.97285	0.944734	0.457333	0.298537	0.24438	0.481025	0.249561	0.106588	0.859214	0.0232942	0.0156781	-0.163524	0.745926	0.504494	0.376021	0.156475	0.112015	-0.103961	0.813547	0.618656	-0.167701	0.617691	0.541216	0.393287	0.168643	0.067752	0.402527	0.313881	0.14303
C10090_1261	mmu_circ_0002904	mmu_circ_0002904	NA	NA	NA	NA	NA	NA	8.40301	0.00335817	0.000745636	NA	NA	NA	NA	NA	NA	NA	NA	NA	NA	NA	NA	NA	NA	NA	NA	NA	NA	NA	NA	NA
C10090_10515	mmu_circ_0002905	mmu_circ_0002905	-0.247205	0.625577	0.425868	0.00581355	0.692755	0.640724	-0.541187	0.390338	0.195712	0.182978	0.837123	0.801944	-0.26208	0.598603	0.33909	0.56906	0.0366908	0.0231292	-0.0719773	0.888441	0.74779	0.314045	0.358345	0.282376	0.0161827	0.975812	0.963136	0.596974	0.067369	0.0214558
C10090_5697	mmu_circ_0002908	mmu_circ_0002908	NA	NA	NA	8.16692	0.00344804	0.00202156	NA	NA	NA	8.2211	0.00474528	0.00296306	-8.16692	0.0025871	0.000348152	1.26813	0.0229666	0.0140775	-8.2211	0.00223134	0.000300122	1.45908	0.00846917	0.00488364	-0.656311	0.338009	0.167648	-0.416914	0.550005	0.318956
C10090_14836	mmu_circ_0002909	mmu_circ_0002909	-0.210515	0.857233	0.729692	0.651584	0.368044	0.30868	NA	NA	NA	8.59954	0.000977058	0.00050132	-0.664653	0.358082	0.1529	-0.796297	0.163219	0.117713	0.723739	0.352464	0.153191	-0.103686	0.90503	0.872988	0.28248	0.798617	0.629048	0.693475	0.423845	0.219416
C10090_15299	mmu_circ_0002918	mmu_circ_0002918	-0.403779	0.0575015	0.0206956	-1.60974	9.74151e-17	8.29618e-18	-0.632374	0.0189514	0.00560528	-1.42535	4.02522e-10	6.18174e-11	-0.449039	0.273696	0.104627	0.439475	0.11367	0.0790656	-0.165387	0.739815	0.511288	1.03246	9.7113e-05	2.98936e-05	0.0742961	0.894936	0.769594	-0.85277	0.00203661	0.000326952
C10090_4254	mmu_circ_0002919	mmu_circ_0002919	NA	NA	NA	NA	NA	NA	-8.91767	0.000462574	3.52658e-05	-8.91767	3.44127e-05	1.13346e-05	NA	NA	NA	NA	NA	NA	NA	NA	NA	NA	NA	NA	NA	NA	NA	NA	NA	NA
C10090_1898	mmu_circ_0002921	mmu_circ_0002921	NA	NA	NA	NA	NA	NA	NA	NA	NA	NA	NA	NA	8.08746	0.00417934	0.000678492	NA	NA	NA	7.94486	0.012887	0.00283418	NA	NA	NA	NA	NA	NA	8.5263	0.00238309	0.000397182
C10090_8632	mmu_circ_0002929	mmu_circ_0002929	-8.94046	0.000154664	9.22932e-06	-8.94046	5.58962e-06	1.55541e-06	NA	NA	NA	NA	NA	NA	8.21286	0.00248178	0.000348676	NA	NA	NA	NA	NA	NA	NA	NA	NA	NA	NA	NA	NA	NA	NA
C10090_6097	mmu_circ_0002930	mmu_circ_0002930	NA	NA	NA	8.16692	0.00343842	0.00202156	NA	NA	NA	8.70667	0.000598386	0.000277272	1.50533	0.00685089	0.00157107	0.203771	0.789742	0.73583	0.670976	0.388473	0.173628	-8.70667	0.000335309	0.000122124	-8.37069	0.00219473	0.000404838	NA	NA	NA
C10090_13660	mmu_circ_0002935	mmu_circ_0002935	NA	NA	NA	9.16717	1.20021e-05	3.63044e-06	NA	NA	NA	9.35865	8.30329e-06	2.42796e-06	-0.369506	0.683685	0.42205	-9.16717	5.49876e-06	1.11824e-06	-0.0353712	0.956151	0.88406	-0.322203	0.591246	0.50689	NA	NA	NA	-0.635569	0.467309	0.25106
C10090_11544	mmu_circ_0002936	mmu_circ_0002936	NA	NA	NA	9.02956	3.45785e-05	1.14599e-05	NA	NA	NA	9.48402	2.8107e-06	7.42718e-07	-0.314288	0.747625	0.510376	-0.658876	0.295905	0.228632	-0.539452	0.420253	0.19933	-0.988162	0.0852423	0.0569788	-8.37069	0.0022824	0.000404838	-8.49586	0.00203902	0.00030619
C10090_1693	mmu_circ_0002941	mmu_circ_0002941	NA	NA	NA	8.51491	0.00075516	0.000360456	NA	NA	NA	8.48422	0.00171436	0.000906406	0.360685	0.737417	0.487746	-8.51491	0.000454964	0.000167231	0.59793	0.51283	0.273124	-8.48422	0.00100898	0.000445348	8.87191	0.00029441	1.98174e-05	NA	NA	NA
C10090_3947	mmu_circ_0002949	mmu_circ_0002949	NA	NA	NA	8.61434	0.000460906	0.000202882	8.26538	0.00529024	0.00143958	NA	NA	NA	-0.401481	0.726536	0.475208	-0.0025792	0.99501	0.994194	9.20775	3.65261e-05	6.71324e-07	9.84361	8.15811e-09	9.13182e-10	0.507957	0.549258	0.339492	-0.732211	0.215035	0.084757
C10090_5002	mmu_circ_0002958	mmu_circ_0002958	NA	NA	NA	8.7077	0.000272103	0.00011419	NA	NA	NA	NA	NA	NA	-8.7077	0.000244837	9.4495e-06	-0.474085	0.509013	0.427934	9.43003	5.91917e-06	6.18126e-08	8.35843	0.00119843	0.000572918	-0.0398479	0.965747	0.94271	0.167872	0.923202	0.817432
C10090_3416	mmu_circ_0002959	mmu_circ_0002959	NA	NA	NA	8.02956	0.00580124	0.0035917	NA	NA	NA	NA	NA	NA	-8.02956	0.00388402	0.000716208	-8.02956	0.00380901	0.00204506	8.79279	0.000481364	2.4028e-05	8.35843	0.00121023	0.000572918	NA	NA	NA	-8.35843	0.00333012	0.000636664
C10090_9243	mmu_circ_0002960	mmu_circ_0002960	NA	NA	NA	NA	NA	NA	NA	NA	NA	8.2211	0.0049168	0.00296306	7.94953	0.00640778	0.00132029	NA	NA	NA	-0.276245	0.824287	0.636292	-8.2211	0.00310523	0.00162404	NA	NA	NA	NA	NA	NA
C10090_5759	mmu_circ_0002961	mmu_circ_0002961	-0.0397843	0.957113	0.916902	2.97109	3.85707e-63	6.0947e-65	0.930182	0.0025141	0.000463786	3.44539	2.15432e-73	2.89138e-75	0.13375	0.341246	0.142087	-0.355262	0.00128802	0.000581696	-0.0530943	0.685062	0.438394	-1.07467	3.51091e-18	1.2951e-19	-0.291008	0.0419238	0.0131396	0.450208	0.00462156	0.00107422
C10090_6607	mmu_circ_0002963	mmu_circ_0002963	NA	NA	NA	NA	NA	NA	NA	NA	NA	NA	NA	NA	7.94953	0.00592074	0.00132029	NA	NA	NA	NA	NA	NA	NA	NA	NA	NA	NA	NA	NA	NA	NA
C10090_13805	mmu_circ_0002964	mmu_circ_0002964	NA	NA	NA	12.4692	3.7829e-53	7.68534e-55	NA	NA	NA	12.317	4.18637e-43	1.15137e-44	-0.449107	0.0100414	0.00234374	-0.675093	0.000101223	2.97984e-05	0.283012	0.181888	0.0637444	-0.888395	9.80143e-06	2.13192e-06	-0.337377	0.200835	0.0839104	-0.0277958	0.931771	0.842592
C10090_9129	mmu_circ_0002967	mmu_circ_0002967	-1.1426	0.0319897	0.0107089	-0.727651	0.0442731	0.0310266	1.21191	0.0450102	0.0142144	-8.43212	0.00060626	0.000284122	0.104529	0.923626	0.811214	-0.448463	0.448344	0.37169	9.26655	2.45918e-05	3.69802e-07	9.20628	7.20592e-06	1.51848e-06	0.545269	0.488373	0.282712	-0.0169514	0.978365	0.94031
C10090_15443	mmu_circ_0002970	mmu_circ_0002970	8.43045	0.00181808	0.000354664	NA	NA	NA	NA	NA	NA	NA	NA	NA	NA	NA	NA	NA	NA	NA	NA	NA	NA	NA	NA	NA	NA	NA	NA	NA	NA	NA
C10090_13194	mmu_circ_0002972	mmu_circ_0002972	NA	NA	NA	NA	NA	NA	NA	NA	NA	NA	NA	NA	NA	NA	NA	NA	NA	NA	NA	NA	NA	8.62132	0.000344289	0.000129993	NA	NA	NA	-8.62132	0.00120823	0.000147255
C10090_73	mmu_circ_0002982	mmu_circ_0002982	0.0515803	0.935041	0.872738	-0.792375	0.0420269	0.0293662	-0.0512477	0.992613	0.976318	-0.921656	0.0123882	0.00810074	0.0644967	0.953827	0.89442	-0.236946	0.723468	0.653316	-0.82883	0.209457	0.077037	-0.862796	0.148778	0.104526	-0.146572	0.902689	0.786282	0.0304486	0.995658	0.988382
C10090_6285	mmu_circ_0002983	mmu_circ_0002983	NA	NA	NA	NA	NA	NA	NA	NA	NA	NA	NA	NA	NA	NA	NA	9.08135	4.93696e-06	9.70592e-07	NA	NA	NA	9.20628	7.08475e-06	1.51848e-06	-9.08135	6.38541e-05	2.83528e-06	-9.20628	4.95445e-05	1.822e-06
C10090_13752	mmu_circ_0002986	mmu_circ_0002986	0.0360113	0.958759	0.919506	0.929281	0.0470524	0.0331578	-1.02932	0.183297	0.0717072	0.511207	0.381856	0.32002	-0.589964	0.202431	0.0705636	0.507212	0.106991	0.0740254	-0.797099	0.113217	0.035871	0.925668	0.00515743	0.00288978	-0.612204	0.104797	0.0377954	0.0721329	0.928978	0.83262
C10090_1825	mmu_circ_0002987	mmu_circ_0002987	-0.457714	0.482245	0.288418	0.369745	0.579694	0.520214	-9.01737	0.000263349	1.69997e-05	0.788701	0.171028	0.130952	-0.392898	0.492177	0.244028	0.84632	0.00551931	0.00310362	-0.659625	0.23395	0.0881954	1.16102	0.000525127	0.000205286	-0.952189	0.00531605	0.00142381	-0.192789	0.659481	0.43328
C10090_1316	mmu_circ_0002995	mmu_circ_0002995	NA	NA	NA	8.61434	0.000466562	0.000202882	NA	NA	NA	NA	NA	NA	-0.664807	0.513709	0.261418	-8.61434	0.000270108	8.94268e-05	NA	NA	NA	NA	NA	NA	NA	NA	NA	NA	NA	NA
C10090_8314	mmu_circ_0002997	mmu_circ_0002997	-8.26256	0.00309384	0.000705366	0.904603	0.208803	0.16514	8.52865	0.00236461	0.000386206	8.70667	0.000618352	0.000277272	0.215457	0.817944	0.61066	0.788628	0.0690048	0.0461022	0.670976	0.389383	0.173628	1.28386	0.00759001	0.00435416	0.201425	0.755403	0.569318	0.160233	0.853345	0.686176
C10090_3997	mmu_circ_0003001	mmu_circ_0003001	-0.721368	0.0263635	0.00867024	-0.575301	0.00895159	0.0058324	-0.0542828	0.994171	0.983106	-0.250851	0.361115	0.300572	0.0900066	0.873658	0.738604	1.31531	4.06317e-08	4.98942e-09	0.94602	0.00511785	0.000911764	2.17674	1.60884e-18	5.83234e-20	-0.0396835	0.900835	0.808922	0.0175082	0.995344	0.990886
C10090_12430	mmu_circ_0003002	mmu_circ_0003002	-0.337801	0.313361	0.159909	-2.71859	3.32197e-16	2.99952e-17	-0.842619	0.000941461	0.000101376	-3.54429	1.89707e-30	7.6801e-32	-8.61434	0.000405082	1.94393e-05	-8.61434	0.000265666	8.94268e-05	-8.59954	0.000495065	2.71934e-05	-8.59954	0.000582659	0.000233212	NA	NA	NA	NA	NA	NA
C10090_4615	mmu_circ_0003023	mmu_circ_0003023	-0.0706952	0.654441	0.4569	-4.51497	3.53047e-181	1.30409e-183	-0.266924	0.0444154	0.0140018	-4.41387	4.40038e-169	2.03318e-171	-0.369422	0.58322	0.324302	-9.75205	1.03099e-08	1.14343e-09	-0.456927	0.408417	0.186466	-9.98655	2.84426e-09	2.93652e-10	NA	NA	NA	NA	NA	NA
C10090_6937	mmu_circ_0003028	mmu_circ_0003028	NA	NA	NA	NA	NA	NA	NA	NA	NA	NA	NA	NA	NA	NA	NA	8.37069	0.000520178	0.000205704	NA	NA	NA	NA	NA	NA	-8.37069	0.00217523	0.000404838	NA	NA	NA
C10090_14630	mmu_circ_0003030	mmu_circ_0003030	NA	NA	NA	NA	NA	NA	NA	NA	NA	NA	NA	NA	8.43505	0.00101331	9.20818e-05	8.37069	0.000520448	0.000205704	7.94486	0.0117591	0.00283418	9.03645	2.6461e-05	6.69238e-06	0.201444	0.878147	0.74852	-9.03645	0.00014466	7.87752e-06
C10090_5955	mmu_circ_0003031	mmu_circ_0003031	NA	NA	NA	NA	NA	NA	NA	NA	NA	NA	NA	NA	8.21286	0.00231678	0.000348676	9.08135	4.95246e-06	9.70592e-07	8.43003	0.0022193	0.000260958	9.20628	7.09879e-06	1.51848e-06	0.112421	0.912005	0.824122	-0.805402	0.303592	0.136194
C10090_16012	mmu_circ_0003032	mmu_circ_0003032	-0.02801	0.982552	0.964936	1.37469	0.000685672	0.000321378	0.717757	0.266446	0.115949	1.17566	0.0275525	0.0187139	-0.556221	0.141399	0.0450732	-0.938111	0.00508784	0.00284848	0.308642	0.621273	0.371492	0.33515	0.401515	0.322438	0.716926	0.0954246	0.033784	-0.573007	0.240554	0.0988416
C10090_1151	mmu_circ_0003034	mmu_circ_0003034	NA	NA	NA	NA	NA	NA	NA	NA	NA	NA	NA	NA	NA	NA	NA	NA	NA	NA	8.08215	0.008456	0.00156122	NA	NA	NA	NA	NA	NA	NA	NA	NA
C10090_8112	mmu_circ_0003035	mmu_circ_0003035	8.16742	0.00508176	0.00133945	9.56567	2.96416e-07	6.49646e-08	NA	NA	NA	9.48402	2.83192e-06	7.42718e-07	-0.237447	0.777661	0.542314	-1.33205	0.0144953	0.00863832	0.138767	0.904472	0.772806	-0.125806	0.83326	0.782208	0.445509	0.671948	0.47103	0.283659	0.752306	0.540376
C10090_2099	mmu_circ_0003036	mmu_circ_0003036	NA	NA	NA	9.23122	7.1328e-06	2.04338e-06	NA	NA	NA	9.80607	1.00551e-07	2.12606e-08	0.484054	0.455356	0.216938	-0.734967	0.207686	0.153529	-0.482786	0.415608	0.1927	-0.962459	0.0565702	0.0365062	1.3755	0.0122598	0.00343704	0.00470291	0.995689	0.977146
C10090_6980	mmu_circ_0003045	mmu_circ_0003045	0.234955	0.65425	0.456242	0.847221	0.0212166	0.0143157	-0.911436	0.0142418	0.00410928	-0.332525	0.138368	0.104119	-0.180756	0.708761	0.452872	-1.00568	0.00140582	0.000668902	-0.109299	0.814088	0.621108	-0.447837	0.191373	0.138712	0.282257	0.628914	0.421702	-0.298546	0.59339	0.360902
C10090_9282	mmu_circ_0003046	mmu_circ_0003046	0.00663046	0.97936	0.958394	-0.066956	0.57281	0.513448	0.217944	0.605617	0.383692	0.291256	0.60829	0.546056	0.12446	0.854391	0.673638	-0.232349	0.559437	0.479042	-0.394268	0.357079	0.155868	0.165177	0.637579	0.560534	0.00211343	0.994961	0.991436	-0.509967	0.215281	0.0849044
C10090_7895	mmu_circ_0003047	mmu_circ_0003047	NA	NA	NA	8.51491	0.000734938	0.000360456	-8.56986	0.00195092	0.00031484	-8.56986	0.00029918	0.000126979	-0.565376	0.607903	0.34771	-8.51491	0.000440946	0.000167231	7.94486	0.0115294	0.00283418	NA	NA	NA	8.57213	0.0011508	0.000151392	NA	NA	NA
C10090_11638	mmu_circ_0003048	mmu_circ_0003048	0.489783	0.481114	0.287484	0.467657	0.543705	0.48245	-1.31373	0.0187537	0.00553636	-1.16555	0.00556356	0.00353644	0.0269277	0.980417	0.950386	-0.248751	0.651531	0.5762	0.630571	0.388985	0.174426	-0.0554477	0.947223	0.926138	-0.702807	0.361122	0.184484	-8.84361	0.00043781	3.40588e-05
C10090_2086	mmu_circ_0003049	mmu_circ_0003049	0.752914	0.217175	0.0994346	0.445181	0.588306	0.529874	-1.37301	0.0161151	0.00468118	-1.11817	0.00833036	0.00536662	0.142493	0.889703	0.72964	-0.133185	0.82068	0.772058	0.630571	0.389167	0.174426	0.137394	0.834248	0.78402	-0.702807	0.361456	0.184484	-9.03645	0.000155425	7.87752e-06
C10090_15435	mmu_circ_0003050	mmu_circ_0003050	NA	NA	NA	NA	NA	NA	NA	NA	NA	NA	NA	NA	8.08746	0.00388151	0.000678492	NA	NA	NA	NA	NA	NA	NA	NA	NA	NA	NA	NA	NA	NA	NA
C10090_6498	mmu_circ_0003051	mmu_circ_0003051	NA	NA	NA	9.40812	1.43877e-06	3.64344e-07	NA	NA	NA	10.1087	2.02899e-09	3.36602e-10	0.577155	0.284788	0.11067	-9.40812	5.83838e-07	9.14416e-08	0.268989	0.673401	0.42404	-1.75022	0.000577431	0.000227202	NA	NA	NA	-8.35843	0.00317733	0.000636664
C10090_15136	mmu_circ_0003053	mmu_circ_0003053	0.0682669	0.923643	0.84727	0.73798	0.116873	0.0873732	0.225707	0.760283	0.556568	0.998302	0.0488934	0.0341662	-0.0507991	0.9422	0.85812	-0.951474	0.0141971	0.00845482	-0.128373	0.828879	0.646242	0.137135	0.742103	0.680746	0.710312	0.169484	0.0681298	-0.66064	0.181276	0.0691002
C10090_13299	mmu_circ_0003055	mmu_circ_0003055	NA	NA	NA	NA	NA	NA	NA	NA	NA	NA	NA	NA	NA	NA	NA	NA	NA	NA	NA	NA	NA	NA	NA	NA	NA	NA	NA	8.5263	0.00229543	0.000397182
C10090_6410	mmu_circ_0003058	mmu_circ_0003058	-0.148685	0.78461	0.619584	0.686111	0.0294725	0.0202128	-0.118566	0.920255	0.83038	-0.00638487	0.732098	0.68152	-0.494876	0.0756972	0.0214246	-1.07033	7.48629e-05	2.10408e-05	-0.193915	0.629798	0.381062	-0.092337	0.784826	0.724096	0.488259	0.214939	0.091123	-0.429333	0.27557	0.118037
C10090_575	mmu_circ_0003059	mmu_circ_0003059	0.0145156	0.970927	0.941308	0.585251	0.159892	0.123011	-0.166769	0.874463	0.751834	0.155505	0.888221	0.862034	-0.338567	0.423905	0.194337	-1.33867	0.000156218	4.9831e-05	-0.0836874	0.869958	0.710066	-0.722663	0.0543587	0.0349984	0.646172	0.219648	0.0935346	0.104412	0.922518	0.821176
C10090_11797	mmu_circ_0003061	mmu_circ_0003061	-0.35218	0.0738908	0.027583	-12.5104	3.15562e-67	4.59776e-69	-0.145956	0.804319	0.630654	-12.2189	1.9354e-47	4.81188e-49	7.94953	0.00614003	0.00132029	NA	NA	NA	9.14644	5.72071e-05	1.2187e-06	NA	NA	NA	NA	NA	NA	NA	NA	NA
C10090_14052	mmu_circ_0003064	mmu_circ_0003064	-0.723489	0.375252	0.20314	0.264369	0.829105	0.794056	0.212093	0.835037	0.66473	-8.43212	0.000590459	0.000284122	-0.342725	0.691255	0.43364	0.011229	0.981282	0.97404	9.32328	1.47779e-05	2.03706e-07	9.89436	4.05496e-09	4.34982e-10	0.211919	0.800187	0.634064	-0.252492	0.706715	0.491968
C10090_7098	mmu_circ_0003065	mmu_circ_0003065	0.124353	0.607613	0.406972	-0.0304702	0.377546	0.317734	-0.0656651	0.995965	0.986266	-0.0361839	0.517748	0.45293	0.416573	0.0168674	0.00406444	0.586298	0.000226785	7.40144e-05	0.708084	9.38956e-05	2.5886e-06	1.10594	5.16468e-13	3.10954e-14	-0.298759	0.0992298	0.0352718	-0.444801	0.00247424	0.00044387
C10090_5100	mmu_circ_0003066	mmu_circ_0003066	NA	NA	NA	NA	NA	NA	NA	NA	NA	NA	NA	NA	NA	NA	NA	NA	NA	NA	NA	NA	NA	NA	NA	NA	NA	NA	NA	8.40088	0.00347153	0.000765178
C10090_3611	mmu_circ_0003069	mmu_circ_0003069	NA	NA	NA	8.29278	0.00210743	0.00113783	NA	NA	NA	NA	NA	NA	-8.29278	0.00165091	0.000169237	-8.29278	0.00126786	0.000584804	NA	NA	NA	NA	NA	NA	NA	NA	NA	NA	NA	NA
C10090_12758	mmu_circ_0003070	mmu_circ_0003070	NA	NA	NA	NA	NA	NA	NA	NA	NA	NA	NA	NA	NA	NA	NA	NA	NA	NA	NA	NA	NA	NA	NA	NA	NA	NA	NA	8.84831	0.000635141	5.55486e-05
C10090_6893	mmu_circ_0003072	mmu_circ_0003072	-8.52552	0.00112322	0.000166213	0.088821	0.928608	0.915078	NA	NA	NA	8.9867	0.000123818	4.69118e-05	-8.61434	0.000393364	1.94393e-05	0.203921	0.757267	0.696102	-0.663415	0.41833	0.197195	-0.0435945	0.958345	0.941482	0.445711	0.583672	0.372618	0.753171	0.26575	0.112139
C10090_141	mmu_circ_0003074	mmu_circ_0003074	0.687298	0.129825	0.0529444	0.878103	0.0438399	0.030696	0.897342	0.0288854	0.0087926	0.614648	0.230619	0.181705	-0.342913	0.485291	0.238632	-1.85074	1.89034e-05	4.52628e-06	0.193141	0.788385	0.574658	-1.2414	0.00581083	0.00328422	0.34737	0.721139	0.528336	-0.0947909	0.928955	0.83041
C10090_9346	mmu_circ_0003075	mmu_circ_0003075	-0.0952774	0.920793	0.83751	0.269545	0.779148	0.738536	0.248459	0.773016	0.584386	0.904313	0.144327	0.109111	0.0420893	0.957684	0.907228	-1.42438	0.00484861	0.00270262	0.271132	0.735363	0.50345	-0.475678	0.37341	0.296306	0.749032	0.349382	0.175599	-0.182522	0.853181	0.692682
C10090_10355	mmu_circ_0003076	mmu_circ_0003076	NA	NA	NA	NA	NA	NA	NA	NA	NA	8.48422	0.00170938	0.000906406	NA	NA	NA	NA	NA	NA	-8.48422	0.000903073	6.05444e-05	-8.48422	0.00100609	0.000445348	NA	NA	NA	NA	NA	NA
C10090_673	mmu_circ_0003077	mmu_circ_0003077	-0.14584	0.515858	0.31846	0.520069	0.00201434	0.00106814	-0.410132	0.0495487	0.0158131	0.261896	0.246053	0.196572	0.412423	0.000315161	1.41587e-05	-1.05846	4.65925e-15	2.21596e-16	0.295853	0.0342884	0.0092381	-1.03392	9.59052e-12	6.95348e-13	-0.248852	0.274801	0.125848	-0.0322387	0.90525	0.783184
C10090_5674	mmu_circ_0003078	mmu_circ_0003078	-0.358103	0.752305	0.577566	-0.358605	0.47025	0.407524	8.8505	0.000575739	5.36652e-05	NA	NA	NA	0.78291	0.354184	0.149861	-8.16692	0.00217206	0.0010936	8.2075	0.0049851	0.000860002	NA	NA	NA	NA	NA	NA	NA	NA	NA
C10090_10157	mmu_circ_0003080	mmu_circ_0003080	NA	NA	NA	NA	NA	NA	NA	NA	NA	NA	NA	NA	NA	NA	NA	8.7187	7.48524e-05	2.07156e-05	NA	NA	NA	NA	NA	NA	-0.0395759	0.97051	0.932918	NA	NA	NA
C10090_5378	mmu_circ_0003083	mmu_circ_0003083	-8.94046	0.00015261	9.22932e-06	-8.94046	5.52443e-06	1.55541e-06	8.64422	0.00146124	0.000200036	8.59954	0.000982535	0.00050132	8.43505	0.00102951	9.20818e-05	8.37069	0.000524255	0.000205704	0.193249	0.898192	0.76125	0.606741	0.320517	0.248966	0.0858724	0.961145	0.899172	-0.679978	0.395209	0.196487
C10090_7156	mmu_circ_0003085	mmu_circ_0003085	-0.0199357	0.987762	0.97111	-0.614028	0.0154992	0.0102957	-0.0857872	0.967841	0.931756	-1.51941	1.63527e-05	5.01556e-06	0.0788267	0.914407	0.799756	0.203821	0.595963	0.515084	0.653311	0.263168	0.102783	0.992845	0.0167759	0.0100862	-0.607943	0.184891	0.0760264	0.0147333	0.997554	0.994262
C10090_8911	mmu_circ_0003086	mmu_circ_0003086	-0.247289	0.670622	0.476452	-0.55486	0.0609582	0.0435702	-0.304319	0.71388	0.507304	-1.08577	0.00663095	0.00424264	0.00757141	0.994601	0.987492	0.158029	0.731808	0.664298	0.197505	0.867365	0.705776	0.490904	0.356271	0.28044	-0.293602	0.644235	0.43867	-0.37062	0.620687	0.389356
C10090_1518	mmu_circ_0003087	mmu_circ_0003087	0.183442	0.63641	0.438522	-0.408864	0.0617223	0.044205	0.305316	0.283585	0.125696	-1.1654	9.6483e-05	3.53028e-05	0.0960141	0.8888	0.72654	0.121427	0.737061	0.66952	0.530933	0.275883	0.10942	0.809533	0.0197706	0.0119453	-0.54227	0.194059	0.0806668	-0.012467	0.966864	0.918316
C10090_11360	mmu_circ_0003088	mmu_circ_0003088	-0.297396	0.000187034	1.24122e-05	-0.59356	7.92521e-26	4.16346e-27	-0.114867	0.66822	0.45552	-0.694287	4.89766e-24	2.70476e-25	-0.274019	0.0017799	0.000214446	0.127023	0.12505	0.087622	0.453405	5.55919e-07	3.13488e-09	0.523355	1.75658e-10	1.48213e-11	-0.379097	2.76425e-05	8.68318e-07	-0.00663747	0.885199	0.759368
C10090_3858	mmu_circ_0003089	mmu_circ_0003089	0.435123	0.515567	0.318556	-9.11061	1.21314e-06	2.97248e-07	0.610979	0.348696	0.166877	-8.91767	3.44357e-05	1.13346e-05	NA	NA	NA	NA	NA	NA	8.2075	0.00513428	0.000860002	8.62132	0.000345648	0.000129993	NA	NA	NA	0.127544	0.93431	0.854138
C10090_13074	mmu_circ_0003091	mmu_circ_0003091	-0.220599	0.786602	0.62263	0.0401525	0.836575	0.802412	0.229159	0.718347	0.514276	0.000219772	0.850426	0.81712	-0.079844	0.932884	0.830204	0.100728	0.836454	0.792556	-0.487978	0.502019	0.259712	0.321532	0.527641	0.445984	0.490819	0.355697	0.179865	0.54659	0.328296	0.151688
C10090_1421	mmu_circ_0003095	mmu_circ_0003095	-8.26256	0.00298522	0.000705366	-8.26256	0.00049408	0.000222858	NA	NA	NA	NA	NA	NA	NA	NA	NA	NA	NA	NA	NA	NA	NA	NA	NA	NA	NA	NA	NA	NA	NA	NA
C10090_286	mmu_circ_0003096	mmu_circ_0003096	NA	NA	NA	NA	NA	NA	NA	NA	NA	NA	NA	NA	NA	NA	NA	8.91139	1.91365e-05	4.48402e-06	NA	NA	NA	NA	NA	NA	-8.91139	0.000199765	1.17009e-05	NA	NA	NA
C10090_2231	mmu_circ_0003098	mmu_circ_0003098	NA	NA	NA	NA	NA	NA	-0.166744	0.930624	0.867702	-8.43212	0.000602864	0.000284122	NA	NA	NA	NA	NA	NA	NA	NA	NA	NA	NA	NA	NA	NA	NA	NA	NA	NA
C10090_11147	mmu_circ_0003099	mmu_circ_0003099	-0.330031	0.0606984	0.0219924	-2.31583	8.13742e-37	2.67184e-38	-0.328264	0.140404	0.0521534	-2.50893	3.72776e-39	1.12366e-40	-0.0537954	0.93509	0.841142	0.399799	0.185175	0.135218	-0.1334	0.799495	0.591272	0.529484	0.0824007	0.0548348	-0.209615	0.626746	0.41862	0.231535	0.610137	0.377704
C10090_9349	mmu_circ_0003100	mmu_circ_0003100	-0.321592	0.0635664	0.0231336	-2.31297	5.3526e-38	1.65861e-39	-0.316103	0.155541	0.0590312	-2.4981	2.89187e-40	8.27158e-42	-0.0547868	0.935737	0.8358	0.370951	0.215544	0.160398	-0.192314	0.699541	0.45438	0.537719	0.0704254	0.0462386	-0.181676	0.67592	0.47589	0.182577	0.706452	0.488954
C10090_184	mmu_circ_0003101	mmu_circ_0003101	-9.18859	2.72083e-05	1.05572e-06	-9.18859	5.64362e-07	1.29943e-07	-0.65229	0.551386	0.327088	-8.91767	3.49259e-05	1.13346e-05	NA	NA	NA	NA	NA	NA	NA	NA	NA	NA	NA	NA	NA	NA	NA	NA	NA	NA
C10090_2651	mmu_circ_0003102	mmu_circ_0003102	-9.11061	4.67086e-05	2.17482e-06	-9.11061	1.2162e-06	2.97248e-07	-9.19795	8.15921e-05	3.9502e-06	-9.19795	3.73557e-06	1.01177e-06	NA	NA	NA	NA	NA	NA	NA	NA	NA	NA	NA	NA	NA	NA	NA	NA	NA	NA
C10090_9495	mmu_circ_0003103	mmu_circ_0003103	-0.220827	0.860747	0.728076	-8.52552	0.000114032	4.25894e-05	-8.56986	0.00209156	0.00031484	-8.56986	0.000306326	0.000126979	NA	NA	NA	NA	NA	NA	NA	NA	NA	NA	NA	NA	NA	NA	NA	NA	NA	NA
C10090_323	mmu_circ_0003104	mmu_circ_0003104	-0.149666	0.866246	0.725542	-9.6954	1.08141e-09	1.73318e-10	0.0177344	0.93236	0.855312	-9.56986	8.75921e-08	1.80388e-08	7.94953	0.00651103	0.00132029	NA	NA	NA	NA	NA	NA	8.84361	9.95199e-05	2.94952e-05	NA	NA	NA	-8.84361	0.000467564	3.40588e-05
C10090_15359	mmu_circ_0003105	mmu_circ_0003105	NA	NA	NA	NA	NA	NA	8.64422	0.00140967	0.000200036	NA	NA	NA	NA	NA	NA	NA	NA	NA	NA	NA	NA	NA	NA	NA	NA	NA	NA	NA	NA	NA
C10090_13792	mmu_circ_0003108	mmu_circ_0003108	-0.095332	0.94047	0.88762	-0.370462	0.47875	0.417248	8.52865	0.00225695	0.000386206	NA	NA	NA	0.298663	0.823961	0.635848	0.881829	0.177399	0.128595	NA	NA	NA	9.20628	7.10583e-06	1.51848e-06	-0.232264	0.812279	0.656116	-0.357972	0.680572	0.460774
C10090_4566	mmu_circ_0003109	mmu_circ_0003109	8.16742	0.00500553	0.00133945	8.29278	0.0020939	0.00113783	NA	NA	NA	NA	NA	NA	0.142263	0.922778	0.811788	1.26257	0.017656	0.0106559	8.2075	0.00508985	0.000860002	9.55995	2.51289e-07	3.72378e-08	-0.160036	0.835685	0.693378	-0.159071	0.852289	0.68372
C10090_11559	mmu_circ_0003111	mmu_circ_0003111	-0.401254	0.00113228	0.000172402	-1.23633	1.99793e-30	8.20002e-32	-0.585284	4.50431e-05	1.46634e-06	-1.36363	2.44331e-31	9.35394e-33	0.600734	6.70893e-05	1.35631e-06	0.484723	0.000704855	0.000284514	0.419196	0.0115057	0.0028476	0.420964	0.00585951	0.00331546	-0.307152	0.0566351	0.0185662	-0.23698	0.18534	0.0710864
C10090_13785	mmu_circ_0003117	mmu_circ_0003117	-0.0770711	0.883175	0.771626	-0.836353	0.000327864	0.000140417	-0.602913	0.231677	0.0972732	-0.647441	0.0316925	0.021728	0.102357	0.883221	0.714044	1.1473	8.88518e-06	1.86155e-06	0.702309	0.0774833	0.0229634	1.55759	9.32451e-08	1.25526e-08	-0.0396575	0.912769	0.82589	0.138676	0.75782	0.551304
C10090_12642	mmu_circ_0003119	mmu_circ_0003119	-8.40003	0.00206382	0.000342406	-8.40003	0.00023977	9.74236e-05	NA	NA	NA	NA	NA	NA	NA	NA	NA	8.81826	3.77015e-05	9.63792e-06	7.94486	0.0122363	0.00283418	8.73674	0.000186157	6.19208e-05	-0.139134	0.902598	0.788974	0.664139	0.402606	0.202252
C10090_15557	mmu_circ_0003120	mmu_circ_0003120	NA	NA	NA	NA	NA	NA	NA	NA	NA	NA	NA	NA	NA	NA	NA	8.23362	0.000992526	0.00044214	NA	NA	NA	NA	NA	NA	-8.23362	0.00350668	0.000822422	NA	NA	NA
C10090_4928	mmu_circ_0003124	mmu_circ_0003124	NA	NA	NA	NA	NA	NA	NA	NA	NA	NA	NA	NA	NA	NA	NA	8.37069	0.000526455	0.000205704	NA	NA	NA	NA	NA	NA	-8.37069	0.00223771	0.000404838	NA	NA	NA
C10090_9454	mmu_circ_0003125	mmu_circ_0003125	NA	NA	NA	NA	NA	NA	NA	NA	NA	8.48422	0.00171937	0.000906406	7.94953	0.00638878	0.00132029	9.6664	9.10637e-09	9.91284e-10	-0.40207	0.71702	0.478762	1.01164	0.0728118	0.0478826	0.249776	0.710769	0.518052	0.0892953	0.937619	0.867552
C10090_15241	mmu_circ_0003127	mmu_circ_0003127	-0.171183	0.684403	0.493752	0.16815	0.896759	0.876332	0.195838	0.570868	0.349446	0.363876	0.383116	0.32116	-0.25856	0.448422	0.212078	0.539697	0.00804745	0.00463248	0.133687	0.80762	0.612968	0.805338	0.000399988	0.000154924	0.137591	0.648906	0.446602	-0.0340917	0.909379	0.79083
C10090_8499	mmu_circ_0003128	mmu_circ_0003128	-0.510351	0.511311	0.31319	-0.0953975	0.651592	0.597972	9.11348	0.000148892	7.45704e-06	9.2914	1.46274e-05	4.38984e-06	-0.0158969	0.989221	0.966192	0.744225	0.090774	0.0618186	-0.209252	0.800954	0.596366	1.06681	0.00882221	0.0050947	0.282257	0.629357	0.421702	-0.893258	0.0478732	0.0146938
C10090_15043	mmu_circ_0003129	mmu_circ_0003129	0.859145	0.119273	0.047907	0.674065	0.285428	0.232712	-0.669304	0.480235	0.266842	-0.128907	0.688324	0.6335	-0.664699	0.281967	0.109286	0.203897	0.658862	0.58525	0.0773945	0.969479	0.914404	1.01164	0.0245622	0.0149914	0.301297	0.613123	0.404308	-0.0100266	0.977095	0.938168
C10090_1901	mmu_circ_0003131	mmu_circ_0003131	NA	NA	NA	9.40812	1.46007e-06	3.64344e-07	NA	NA	NA	9.06905	7.29737e-05	2.59462e-05	-0.458291	0.539522	0.286342	-9.40812	5.9553e-07	9.14416e-08	0.460579	0.56369	0.313632	-9.06905	3.52758e-05	9.18352e-06	NA	NA	NA	NA	NA	NA
C10090_7993	mmu_circ_0003133	mmu_circ_0003133	0.340761	0.650763	0.453636	0.888891	0.09795	0.0722012	0.970888	0.151175	0.0571638	2.02166	5.71181e-05	1.97683e-05	-0.645377	0.227315	0.0826728	-0.546168	0.21485	0.159618	-0.246039	0.617022	0.368306	-0.717045	0.062118	0.0403892	0.0858598	0.932019	0.853654	0.0119559	0.995841	0.988094
C10090_14677	mmu_circ_0003134	mmu_circ_0003134	-0.375337	0.679844	0.486824	0.264369	0.828928	0.794056	0.766205	0.278119	0.122654	1.23621	0.0312861	0.021415	-0.964326	0.152932	0.0494678	-0.133185	0.820501	0.772058	-0.229204	0.729058	0.497002	-0.52182	0.28824	0.220778	-9.15937	3.88768e-05	1.39567e-06	-0.172849	0.852794	0.690156
C10090_8843	mmu_circ_0003136	mmu_circ_0003136	NA	NA	NA	NA	NA	NA	NA	NA	NA	NA	NA	NA	7.94953	0.00645255	0.00132029	NA	NA	NA	NA	NA	NA	NA	NA	NA	NA	NA	NA	NA	NA	NA
C10090_1129	mmu_circ_0003138	mmu_circ_0003138	NA	NA	NA	8.40812	0.00126964	0.00064042	NA	NA	NA	8.9867	0.000127064	4.69118e-05	0.12638	0.931876	0.826262	-8.40812	0.000766572	0.000312726	-0.663415	0.419073	0.197195	-8.9867	6.1918e-05	1.75371e-05	NA	NA	NA	NA	NA	NA
C10090_5781	mmu_circ_0003139	mmu_circ_0003139	NA	NA	NA	8.7077	0.00027091	0.00011419	NA	NA	NA	9.54303	1.61368e-06	4.10786e-07	0.67492	0.336338	0.139013	-8.7077	0.000151574	4.78212e-05	0.506	0.402779	0.182378	-0.806292	0.144667	0.101423	8.19377	0.00452566	0.00115653	-0.335861	0.760096	0.554214
C10090_15122	mmu_circ_0003142	mmu_circ_0003142	NA	NA	NA	NA	NA	NA	NA	NA	NA	NA	NA	NA	NA	NA	NA	NA	NA	NA	NA	NA	NA	8.62132	0.000340466	0.000129993	NA	NA	NA	-8.62132	0.00117637	0.000147255
C10090_8220	mmu_circ_0003148	mmu_circ_0003148	-8.52552	0.00121316	0.000166213	-8.52552	0.000114535	4.25894e-05	NA	NA	NA	NA	NA	NA	NA	NA	NA	8.99887	9.86084e-06	2.08618e-06	NA	NA	NA	9.73674	3.23411e-08	4.02464e-09	0.872879	0.116328	0.0428882	-0.0404681	0.947747	0.884072
C10090_3051	mmu_circ_0003149	mmu_circ_0003149	NA	NA	NA	8.40812	0.00125888	0.00064042	NA	NA	NA	NA	NA	NA	0.0269277	0.989705	0.96808	1.20383	0.0198646	0.0120906	8.32328	0.00325429	0.000473734	9.99053	1.03456e-09	9.86964e-11	-0.740042	0.237174	0.102958	-0.14222	0.843204	0.668282
C10090_10130	mmu_circ_0003151	mmu_circ_0003151	-8.52552	0.00114813	0.000166213	-0.0106095	0.818072	0.781642	-9.28031	5.26431e-05	1.90417e-06	-0.21126	0.577964	0.514382	0.112987	0.936172	0.83963	-8.51491	0.000454711	0.000167231	-0.446263	0.600701	0.344638	-9.06905	3.52184e-05	9.18352e-06	NA	NA	NA	NA	NA	NA
C10090_15998	mmu_circ_0003155	mmu_circ_0003155	NA	NA	NA	NA	NA	NA	8.26538	0.00531196	0.00143958	NA	NA	NA	NA	NA	NA	NA	NA	NA	NA	NA	NA	NA	NA	NA	NA	NA	NA	NA	NA	NA
C10090_7058	mmu_circ_0003156	mmu_circ_0003156	-0.18073	0.531778	0.33398	-1.9944	7.94093e-19	5.93166e-20	0.0843905	0.59385	0.37095	-1.80637	2.37843e-16	2.0566e-17	0.117248	0.880487	0.709316	-10.0651	9.51449e-11	7.64592e-12	0.0516296	0.964968	0.916196	-10.4538	1.04911e-12	6.53888e-14	NA	NA	NA	NA	NA	NA
C10090_13017	mmu_circ_0003161	mmu_circ_0003161	NA	NA	NA	9.61453	1.72322e-07	3.6565e-08	-0.166579	0.930624	0.85605	0.904313	0.144201	0.109111	-0.0798339	0.931678	0.827418	-0.179481	0.728014	0.660108	-0.0226788	0.966989	0.90216	0.0217783	0.964545	0.952072	0.244083	0.748107	0.561522	0.226991	0.784086	0.599802
C10090_1124	mmu_circ_0003166	mmu_circ_0003166	-0.00213129	0.987491	0.971636	-2.55508	1.01919e-13	1.1336e-14	0.705565	0.00352069	0.000826784	-10.993	3.03465e-20	2.06316e-21	0.405805	0.676191	0.414248	-0.243654	0.750288	0.685688	9.20775	3.82655e-05	6.71324e-07	8.35843	0.00122616	0.000572918	-0.0393226	0.969181	0.94011	0.58291	0.568482	0.338784
C10090_7928	mmu_circ_0003167	mmu_circ_0003167	NA	NA	NA	NA	NA	NA	NA	NA	NA	NA	NA	NA	NA	NA	NA	NA	NA	NA	8.08215	0.00755061	0.00156122	NA	NA	NA	NA	NA	NA	NA	NA	NA
C10090_5784	mmu_circ_0003169	mmu_circ_0003169	1.48975	0.00380473	0.000977398	2.26954	2.43216e-07	5.25064e-08	-0.829782	0.319844	0.148976	1.26865	0.00280649	0.0015709	-0.385887	0.336992	0.13949	-1.6357	9.78368e-06	2.17014e-06	-0.916788	0.0131881	0.00280124	-0.503344	0.158501	0.112265	0.841619	0.10975	0.0398668	-0.59743	0.263108	0.110279
C10090_3128	mmu_circ_0003170	mmu_circ_0003170	0.40999	0.390855	0.215352	0.427561	0.444454	0.381886	-0.726267	0.275493	0.121113	0.653743	0.134441	0.100838	0.413938	0.311805	0.12518	0.778875	0.00580326	0.00326924	0.0512209	0.970168	0.91323	1.04971	6.06668e-05	1.71184e-05	-0.163365	0.688699	0.49058	-0.635503	0.0163755	0.00448184
C10090_11359	mmu_circ_0003173	mmu_circ_0003173	-0.0682458	0.919293	0.835654	-0.153521	0.357704	0.298246	-0.321992	0.608104	0.387298	-0.696652	0.018417	0.012274	0.0196821	0.979777	0.945564	-0.649277	0.0634618	0.0421778	0.148836	0.860598	0.697214	0.217332	0.604883	0.5223	-0.0398205	0.961683	0.90172	0.0879241	0.927732	0.82866
C10090_470	mmu_circ_0003174	mmu_circ_0003174	0.196578	0.618981	0.419224	0.897763	0.00124244	0.000621346	-0.0914349	0.958294	0.912966	1.2482	3.54166e-07	8.16646e-08	0.638824	0.000949226	6.88126e-05	0.404971	0.0340893	0.0213984	-0.373275	0.066083	0.0191155	0.684165	2.01737e-05	4.79002e-06	0.286193	0.190818	0.078914	-0.346507	0.0367127	0.0109134
C10090_5928	mmu_circ_0003176	mmu_circ_0003176	NA	NA	NA	8.16692	0.00344082	0.00202156	NA	NA	NA	8.48422	0.00166854	0.000906406	-8.16692	0.00256762	0.000348152	-8.16692	0.00216765	0.0010936	-8.48422	0.000828247	6.05444e-05	-8.48422	0.000983477	0.000445348	8.19377	0.00450899	0.00115653	NA	NA	NA
C10090_10095	mmu_circ_0003180	mmu_circ_0003180	0.390101	0.54542	0.347802	-9.26256	2.61391e-07	5.68054e-08	-0.903744	0.132865	0.0486508	-10.0172	1.94744e-10	2.87082e-11	8.79766	0.000201597	6.42212e-06	10.9989	9.03029e-22	2.35106e-23	8.79279	0.000487483	2.4028e-05	10.6213	7.21212e-15	3.30256e-16	-0.957284	0.00403365	0.000955538	-0.220547	0.659385	0.433372
C10090_8407	mmu_circ_0003182	mmu_circ_0003182	-0.095272	0.894669	0.792442	-0.648039	0.0349604	0.0241846	0.155117	0.760362	0.557472	0.266684	0.702754	0.647554	0.794653	0.0522555	0.0140429	0.654484	0.0868157	0.058856	0.166215	0.821384	0.638168	-0.103819	0.82139	0.76706	0.330717	0.48672	0.279916	0.615588	0.160392	0.0587196
C10090_2299	mmu_circ_0003184	mmu_circ_0003184	NA	NA	NA	NA	NA	NA	NA	NA	NA	NA	NA	NA	7.94953	0.00625285	0.00132029	8.37069	0.000533169	0.000205704	NA	NA	NA	8.49586	0.000660143	0.000272902	1.25593	0.0399773	0.0124728	0.0304486	0.994713	0.988382
C10090_324	mmu_circ_0003186	mmu_circ_0003186	NA	NA	NA	9.09987	2.07881e-05	6.45016e-06	NA	NA	NA	8.35843	0.00291867	0.00163882	-9.09987	1.90299e-05	2.56478e-07	0.271032	0.618481	0.53873	0.723718	0.416461	0.191356	1.48518	0.00452615	0.00250824	1.02441	0.0184056	0.00529912	-0.317303	0.642763	0.40775
C10090_6998	mmu_circ_0003187	mmu_circ_0003187	NA	NA	NA	10.9171	4.88995e-18	3.80318e-19	-8.56986	0.00203148	0.00031484	1.61465	0.00184602	0.00101866	-0.00388504	0.995721	0.983114	0.652592	0.00544574	0.0030589	0.296186	0.611727	0.359396	1.40641	5.20402e-07	8.26332e-08	0.650833	0.00206269	0.000351738	0.520384	0.0273813	0.00788132
C10090_4809	mmu_circ_0003189	mmu_circ_0003189	-0.32254	0.507362	0.310228	0.248195	0.729439	0.681688	-0.132808	0.916576	0.82094	0.373708	0.40354	0.3413	-0.622319	0.0814815	0.0233446	-1.46994	5.21415e-05	1.35431e-05	-0.322907	0.408492	0.186415	-1.31649	0.000239664	8.41898e-05	0.474953	0.455237	0.255466	0.0251997	0.998559	0.986554
C10090_7155	mmu_circ_0003190	mmu_circ_0003190	0.582769	0.29994	0.149689	0.730515	0.172524	0.133438	0.170218	0.782683	0.607374	0.898249	0.0609321	0.0431954	-0.236023	0.733573	0.482058	-9.99308	3.04026e-10	2.67378e-11	0.0940378	0.92283	0.812198	-0.898469	0.0327105	0.02036	8.33136	0.00280307	0.000587228	-0.609348	0.418485	0.21457
C10090_9588	mmu_circ_0003192	mmu_circ_0003192	NA	NA	NA	NA	NA	NA	NA	NA	NA	NA	NA	NA	8.32823	0.0015896	0.000179183	NA	NA	NA	NA	NA	NA	NA	NA	NA	NA	NA	NA	NA	NA	NA
C10090_8751	mmu_circ_0003194	mmu_circ_0003194	NA	NA	NA	NA	NA	NA	NA	NA	NA	NA	NA	NA	NA	NA	NA	8.37069	0.000536017	0.000205704	NA	NA	NA	NA	NA	NA	-8.37069	0.00233526	0.000404838	NA	NA	NA
C10090_7869	mmu_circ_0003197	mmu_circ_0003197	NA	NA	NA	NA	NA	NA	NA	NA	NA	NA	NA	NA	NA	NA	NA	9.37091	3.15545e-07	4.54752e-08	NA	NA	NA	9.55995	2.50215e-07	3.72378e-08	-9.37091	7.41948e-06	1.66474e-07	-0.448554	0.536576	0.308006
C10090_15055	mmu_circ_0003198	mmu_circ_0003198	NA	NA	NA	NA	NA	NA	NA	NA	NA	NA	NA	NA	NA	NA	NA	9.61195	1.84935e-08	2.13066e-09	NA	NA	NA	9.20628	7.07076e-06	1.51848e-06	-1.41818	0.0198473	0.00575636	-0.564591	0.490437	0.271116
C10090_7785	mmu_circ_0003199	mmu_circ_0003199	NA	NA	NA	NA	NA	NA	NA	NA	NA	NA	NA	NA	NA	NA	NA	8.81826	3.73125e-05	9.63792e-06	NA	NA	NA	NA	NA	NA	-8.81826	0.000303142	2.37702e-05	8.2635	0.00568477	0.00147413
C10090_15158	mmu_circ_0003200	mmu_circ_0003200	-0.429691	0.49604	0.299854	-0.921196	0.0201292	0.0135489	0.418297	0.529002	0.307628	-0.304287	0.499024	0.433366	-0.927903	0.266194	0.100835	-8.87744	5.0882e-05	1.36749e-05	-0.183282	0.851509	0.685582	-0.447635	0.543329	0.460856	8.33136	0.00281258	0.000587228	0.042448	0.995356	0.974942
C10090_9427	mmu_circ_0003202	mmu_circ_0003202	0.0492228	0.929213	0.856358	-0.573939	0.0613945	0.0438946	0.142603	0.688796	0.476446	-0.605536	0.0419773	0.0291024	0.335155	0.601064	0.34073	-1.38091	0.0103184	0.006018	-0.235831	0.698524	0.45299	-0.99201	0.0324774	0.020208	0.338512	0.77581	0.593126	0.428506	0.618022	0.386956
C10090_2239	mmu_circ_0003203	mmu_circ_0003203	0.116291	0.721007	0.530964	-0.736751	0.000324738	0.000139012	0.0963164	0.595386	0.3734	-0.5946	0.000984946	0.000509268	-0.0584405	0.924068	0.811036	-0.907983	0.00527177	0.00295794	-0.590518	0.025586	0.0066637	-1.80138	1.75398e-08	2.11578e-09	-0.350033	0.573732	0.361936	0.226991	0.784328	0.599802
C10090_838	mmu_circ_0003205	mmu_circ_0003205	-8.26256	0.00305441	0.000705366	-8.26256	0.000495884	0.000222858	8.40301	0.00340078	0.000745636	8.59954	0.0010033	0.00050132	NA	NA	NA	NA	NA	NA	-8.59954	0.000508602	2.71934e-05	0.0217783	0.972246	0.961528	8.19377	0.00486756	0.00115653	-0.357815	0.757578	0.548092
C10090_8587	mmu_circ_0003206	mmu_circ_0003206	-8.26256	0.00306506	0.000705366	-8.26256	0.000496565	0.000222858	NA	NA	NA	8.2211	0.00494932	0.00296306	NA	NA	NA	NA	NA	NA	-8.2211	0.00242734	0.000300122	-8.2211	0.00311914	0.00162404	NA	NA	NA	NA	NA	NA
C10090_7238	mmu_circ_0003207	mmu_circ_0003207	0.190557	0.48407	0.289898	0.479066	0.0714875	0.0515508	-0.478288	0.069201	0.023067	-0.0822519	0.348815	0.28949	-0.0714635	0.826683	0.642844	-0.779466	8.8054e-05	2.57772e-05	-0.0731035	0.779584	0.564498	-0.571586	0.00427986	0.00236812	0.387726	0.154072	0.0605882	0.308411	0.309324	0.139568
C10090_12581	mmu_circ_0003209	mmu_circ_0003209	8.43045	0.00192084	0.000354664	NA	NA	NA	-8.43212	0.00341682	0.000653132	-8.43212	0.000593444	0.000284122	7.94953	0.00605379	0.00132029	NA	NA	NA	NA	NA	NA	NA	NA	NA	NA	NA	NA	NA	NA	NA
C10090_7356	mmu_circ_0003210	mmu_circ_0003210	-0.210515	0.856426	0.729692	0.526199	0.516552	0.45454	-0.24495	0.85073	0.70042	0.000219772	0.850231	0.81712	-0.147021	0.880397	0.73693	-0.79648	0.185082	0.135112	0.122139	0.922348	0.815242	-9.35865	3.56008e-06	6.90582e-07	1.08608	0.10161	0.03631	8.84831	0.00061847	5.55486e-05
C10090_4130	mmu_circ_0003212	mmu_circ_0003212	-0.166031	0.529984	0.332144	0.0199473	0.518418	0.456714	-0.339052	0.249685	0.10671	0.278267	0.294106	0.238326	0.160057	0.500801	0.251372	-0.664584	0.000245938	8.06182e-05	-0.303882	0.0750043	0.0221034	-0.492716	0.00307949	0.00168239	0.0869143	0.819801	0.67013	-0.215722	0.393209	0.194472
C10090_13564	mmu_circ_0003213	mmu_circ_0003213	-9.33293	7.81221e-06	2.4877e-07	-0.233058	0.46894	0.405234	-0.607557	0.50436	0.28572	-0.211227	0.567701	0.503374	-0.0797272	0.941412	0.854518	-0.38117	0.533929	0.453916	0.230439	0.823479	0.64014	0.137041	0.820998	0.765998	0.612437	0.410986	0.221412	-9.28425	2.81596e-05	8.76252e-07
C10090_6411	mmu_circ_0003214	mmu_circ_0003214	-0.60972	0.417851	0.235034	0.351961	0.668785	0.615946	-0.166666	0.92229	0.835296	0.312343	0.718233	0.665452	0.0577227	0.952849	0.879688	-0.615653	0.215613	0.160361	0.0580947	0.975898	0.936764	-0.0644839	0.921212	0.891918	0.516827	0.466211	0.263056	-1.09471	0.124392	0.0434286
C10090_14627	mmu_circ_0003215	mmu_circ_0003215	NA	NA	NA	8.02956	0.00568258	0.0035917	NA	NA	NA	NA	NA	NA	-0.0800284	0.952465	0.897422	-8.02956	0.00374748	0.00204506	7.94486	0.0117693	0.00283418	NA	NA	NA	NA	NA	NA	NA	NA	NA
C10090_567	mmu_circ_0003216	mmu_circ_0003216	-0.275747	0.496575	0.30031	0.486916	0.144786	0.109993	-1.64852	4.07425e-06	6.57502e-08	0.176846	0.7606	0.713408	-0.22898	0.495506	0.246488	-0.603494	0.0114781	0.00674848	0.124968	0.785917	0.571218	-0.147803	0.56486	0.480796	0.208252	0.616739	0.408586	-0.655271	0.019763	0.00547884
C10090_9741	mmu_circ_0003217	mmu_circ_0003217	0.904853	0.218217	0.09997	0.252347	0.891709	0.86975	-8.43212	0.00332487	0.000653132	0.0520944	0.936569	0.920496	-0.565376	0.60899	0.34771	0.396481	0.534688	0.453904	-8.48422	0.000917363	6.05444e-05	-8.48422	0.00100996	0.000445348	-8.91139	0.000195817	1.17009e-05	NA	NA	NA
C10090_3027	mmu_circ_0003218	mmu_circ_0003218	8.54574	0.00114622	0.0001825	NA	NA	NA	8.52865	0.00217218	0.000386206	NA	NA	NA	NA	NA	NA	8.49625	0.000275749	9.57038e-05	8.2075	0.00521227	0.000860002	NA	NA	NA	-8.49625	0.00142528	0.000199283	NA	NA	NA
C10090_6901	mmu_circ_0003224	mmu_circ_0003224	0.468742	0.185087	0.0811274	1.02486	0.000614618	0.000287318	0.192316	0.593844	0.371772	1.25384	3.78622e-06	1.03632e-06	0.0335866	0.946495	0.863964	-1.18521	9.76613e-06	2.06414e-06	0.161202	0.651861	0.40081	-0.622684	0.00488507	0.00272164	0.634108	0.0754203	0.0257398	0.0512485	0.943035	0.878788
C10090_10382	mmu_circ_0003227	mmu_circ_0003227	-0.220599	0.78554	0.62263	-0.495957	0.189711	0.147899	0.0849571	0.862904	0.737334	-0.795964	0.0963661	0.070308	-0.231902	0.823338	0.621076	0.203817	0.722673	0.653932	-0.0838847	0.932371	0.830916	0.499613	0.41169	0.332442	-0.554252	0.473063	0.268598	0.435589	0.579147	0.348826
C10090_2312	mmu_circ_0003229	mmu_circ_0003229	-0.159292	0.732583	0.550074	-1.13203	3.07823e-05	9.98702e-06	-0.473428	0.385116	0.192129	-1.01088	0.00213727	0.00118455	-0.765803	0.138745	0.0438872	1.10293	0.000355058	0.000127014	0.460554	0.438357	0.212312	1.24019	0.000355447	0.000136994	-0.533575	0.120579	0.0449108	-0.309043	0.457851	0.243928
C10090_9389	mmu_circ_0003231	mmu_circ_0003231	0.0568043	0.942115	0.891442	-0.154964	0.593084	0.534664	-1.29603	0.0123232	0.00351454	-0.296177	0.315581	0.2592	1.09841	0.0186396	0.00451812	0.910083	0.0451473	0.0290246	-0.0354481	0.946617	0.863976	0.450386	0.242837	0.181935	0.432329	0.398595	0.210312	-0.282661	0.5985	0.366126
C10090_5720	mmu_circ_0003236	mmu_circ_0003236	-0.680109	0.231356	0.107166	-0.616306	0.0818145	0.0595686	-0.123737	0.933125	0.860168	-1.16812	0.00433153	0.00256556	0.203824	0.823725	0.62305	1.20382	0.0016798	0.000804088	0.590167	0.41686	0.193716	2.04962	6.23491e-08	8.1687e-09	-0.277825	0.579323	0.368884	0.0749551	0.923088	0.813414
C10090_11437	mmu_circ_0003238	mmu_circ_0003238	-0.00188055	0.994824	0.991896	-8.84737	1.20154e-05	3.55802e-06	-8.91767	0.000415558	3.52658e-05	-8.91767	3.4528e-05	1.13346e-05	8.94983	8.0635e-05	1.69602e-06	9.55536	3.76718e-08	4.57962e-09	8.62278	0.000984776	7.91852e-05	9.99053	1.03226e-09	9.86964e-11	0.223378	0.765342	0.581508	-0.348658	0.571257	0.343266
C10090_2499	mmu_circ_0003239	mmu_circ_0003239	0.245915	0.782004	0.615852	-0.439253	0.350312	0.290932	-0.304475	0.850783	0.701884	-8.56986	0.00030487	0.000126979	0.612029	0.480345	0.234042	1.45762	0.0028487	0.00147282	9.01514	0.000135422	4.01628e-06	10.4626	2.35277e-13	1.34672e-14	0.0504448	0.962394	0.902614	-0.614295	0.174755	0.065461
C10090_2588	mmu_circ_0003252	mmu_circ_0003252	NA	NA	NA	8.51491	0.000754187	0.000360456	NA	NA	NA	NA	NA	NA	-0.0798661	0.951686	0.879974	-8.51491	0.000453952	0.000167231	NA	NA	NA	NA	NA	NA	NA	NA	NA	NA	NA	NA
C10090_12057	mmu_circ_0003253	mmu_circ_0003253	NA	NA	NA	9.09987	2.049e-05	6.45016e-06	NA	NA	NA	8.80607	0.000355068	0.000153355	-0.384598	0.67619	0.41549	-9.09987	9.56006e-06	2.09114e-06	0.138499	0.931062	0.827222	-8.80607	0.000186672	6.3952e-05	8.33136	0.00291139	0.000587228	8.2635	0.0059498	0.00147413
C10090_13451	mmu_circ_0003255	mmu_circ_0003255	-8.84737	0.000254661	1.90127e-05	0.252503	0.858048	0.828642	0.543626	0.49377	0.278896	0.236211	0.863619	0.832076	-9.09987	1.82025e-05	2.56478e-07	-9.09987	9.52435e-06	2.09114e-06	-0.482786	0.609693	0.355272	-8.80607	0.000185981	6.3952e-05	NA	NA	NA	NA	NA	NA
C10090_944	mmu_circ_0003258	mmu_circ_0003258	NA	NA	NA	8.40812	0.00127119	0.00064042	NA	NA	NA	NA	NA	NA	-8.40812	0.00111905	8.22666e-05	0.673233	0.264165	0.200696	7.94486	0.0131493	0.00283418	9.49586	4.98988e-07	7.81752e-08	0.112421	0.912482	0.824122	0.200417	0.838677	0.663112
C10090_6264	mmu_circ_0003259	mmu_circ_0003259	0.452318	0.579418	0.3808	0.821534	0.203871	0.160947	-9.50263	1.06467e-05	2.1329e-07	-9.50263	1.82174e-07	4.03628e-08	-0.586906	0.392749	0.174199	1.12143	0.0017761	0.000851638	9.08215	9.13179e-05	2.21238e-06	9.84361	8.12732e-09	9.13182e-10	-0.0974961	0.859421	0.722612	0.383166	0.537002	0.307618
C10090_14203	mmu_circ_0003261	mmu_circ_0003261	NA	NA	NA	9.09987	2.03969e-05	6.45016e-06	8.40301	0.00329621	0.000745636	8.48422	0.00166651	0.000906406	-0.302212	0.752098	0.515426	-9.09987	9.49775e-06	2.09114e-06	0.460347	0.668188	0.418106	-8.48422	0.000981639	0.000445348	NA	NA	NA	NA	NA	NA
C10090_10521	mmu_circ_0003264	mmu_circ_0003264	NA	NA	NA	8.51491	0.000754511	0.000360456	NA	NA	NA	NA	NA	NA	-8.51491	0.000672959	3.999e-05	-8.51491	0.000454204	0.000167231	NA	NA	NA	NA	NA	NA	NA	NA	NA	NA	NA	NA
C10090_10973	mmu_circ_0003283	mmu_circ_0003283	-0.482446	0.577666	0.378412	1.82918	6.25638e-06	1.77433e-06	-0.867206	0.194705	0.0775786	1.6118	1.39035e-06	3.47204e-07	0.677284	0.00663617	0.00151912	-0.27343	0.373269	0.300574	-0.276381	0.373617	0.164882	-0.32026	0.226034	0.167237	0.457799	0.20547	0.0860412	-0.328142	0.381191	0.186282
C10090_9829	mmu_circ_0003284	mmu_circ_0003284	NA	NA	NA	NA	NA	NA	NA	NA	NA	NA	NA	NA	NA	NA	NA	NA	NA	NA	NA	NA	NA	8.84361	9.86729e-05	2.94952e-05	NA	NA	NA	-0.317303	0.762859	0.559286
C10090_7461	mmu_circ_0003285	mmu_circ_0003285	9.48925	2.67083e-06	6.28934e-08	NA	NA	NA	0.181019	0.846394	0.68743	-0.0856369	0.789107	0.746396	NA	NA	NA	9.86573	5.18437e-10	4.64446e-11	-0.53936	0.611149	0.362758	1.55209	0.00168601	0.000829246	-0.350033	0.573517	0.361936	-1.00758	0.0523172	0.0162428
C10090_2075	mmu_circ_0003293	mmu_circ_0003293	NA	NA	NA	9.02956	3.47723e-05	1.14599e-05	NA	NA	NA	NA	NA	NA	-0.153968	0.876575	0.737848	-0.211301	0.746128	0.679438	8.52982	0.00147067	0.00014375	9.62132	1.27544e-07	1.77377e-08	0.697437	0.301256	0.142374	0.177962	0.852768	0.690336
C10090_3980	mmu_circ_0003295	mmu_circ_0003295	NA	NA	NA	9.51491	5.05347e-07	1.15422e-07	NA	NA	NA	8.89905	0.000210426	8.48184e-05	0.0197807	0.987816	0.96361	-9.51491	1.86481e-07	2.61486e-08	1.81115	4.1809e-05	8.03348e-07	-8.89905	0.000106663	3.34892e-05	NA	NA	NA	NA	NA	NA
C10090_14476	mmu_circ_0003296	mmu_circ_0003296	NA	NA	NA	8.29278	0.00206889	0.00113783	NA	NA	NA	NA	NA	NA	-0.205319	0.887067	0.733094	0.203473	0.781838	0.72526	8.32328	0.00308604	0.000473734	9.28425	3.64514e-06	7.2331e-07	1.28248	0.0247899	0.0073304	0.357625	0.662943	0.439774
C10090_1176	mmu_circ_0003300	mmu_circ_0003300	9.23769	2.36079e-05	8.97064e-07	9.51491	5.08546e-07	1.15422e-07	-9.75422	9.19792e-07	1.15166e-08	-9.75422	9.0128e-09	1.61021e-09	0.398277	0.52039	0.268856	-9.51491	1.87854e-07	2.61486e-08	9.01514	0.000139347	4.01628e-06	NA	NA	NA	8.33136	0.00299557	0.000587228	NA	NA	NA
C10090_8357	mmu_circ_0003301	mmu_circ_0003301	0.291717	0.524833	0.32695	0.839096	0.0159206	0.0105887	-0.60728	0.289572	0.129236	1.01655	0.00138114	0.000719288	0.249153	0.493927	0.2454	-0.983797	0.00100624	0.000431334	-0.0796815	0.824284	0.634568	-1.58371	4.81942e-07	7.5198e-08	0.623332	0.116546	0.043051	0.320103	0.645419	0.412478
C10090_6581	mmu_circ_0003303	mmu_circ_0003303	NA	NA	NA	8.02956	0.00568074	0.0035917	NA	NA	NA	8.2211	0.00471703	0.00296306	0.405482	0.747525	0.510002	0.881829	0.177299	0.128595	-8.2211	0.00220396	0.000300122	0.815345	0.217912	0.160535	-8.91139	0.000185549	1.17009e-05	-9.03645	0.000143418	7.87752e-06
C10090_14638	mmu_circ_0003305	mmu_circ_0003305	1.64177	0.00118049	0.000190167	-0.0106095	0.817896	0.781642	1.0812	0.0206687	0.00614194	-9.11035	7.87858e-06	2.2639e-06	0.28275	0.808066	0.59289	-8.51491	0.000444309	0.000167231	9.32328	1.45574e-05	2.03706e-07	8.35843	0.00118633	0.000572918	NA	NA	NA	-8.35843	0.00316987	0.000636664
C10090_13130	mmu_circ_0003307	mmu_circ_0003307	NA	NA	NA	NA	NA	NA	NA	NA	NA	NA	NA	NA	8.08746	0.00401277	0.000678492	NA	NA	NA	NA	NA	NA	NA	NA	NA	8.67913	0.000755135	7.6869e-05	NA	NA	NA
C10090_5738	mmu_circ_0003310	mmu_circ_0003310	NA	NA	NA	NA	NA	NA	NA	NA	NA	8.35843	0.00284617	0.00163882	NA	NA	NA	NA	NA	NA	-8.35843	0.00147693	0.000134799	-8.35843	0.00168624	0.000850448	NA	NA	NA	NA	NA	NA
C10090_8354	mmu_circ_0003312	mmu_circ_0003312	-0.372285	0.195668	0.0871264	-0.671501	0.000464053	0.000207124	-0.20737	0.755608	0.550202	-0.0236263	0.658973	0.600688	0.0644998	0.904097	0.781692	0.510448	0.0351868	0.0221306	-0.142092	0.70694	0.46273	0.189059	0.481429	0.397534	0.0351151	0.956284	0.886494	0.341102	0.269455	0.114401
C10090_1399	mmu_circ_0003313	mmu_circ_0003313	-0.0952423	0.806254	0.653288	-0.14985	0.165379	0.127402	-0.166726	0.7906	0.615498	0.297403	0.356484	0.296482	0.163836	0.614179	0.352554	0.356994	0.0690737	0.0461624	-0.215025	0.388743	0.17383	0.147568	0.47875	0.39522	0.325208	0.130902	0.0493742	0.134844	0.695328	0.474698
C10090_14751	mmu_circ_0003315	mmu_circ_0003315	-0.574329	0.193781	0.0861306	-0.471057	0.0743435	0.0537934	0.0646276	0.88231	0.762754	0.172163	0.891804	0.866296	0.389544	0.433033	0.200732	0.533126	0.122576	0.0857632	-0.229204	0.728835	0.497002	0.400216	0.335292	0.262078	0.252446	0.586952	0.375544	0.378962	0.467058	0.251476
C10090_7830	mmu_circ_0003316	mmu_circ_0003316	NA	NA	NA	NA	NA	NA	NA	NA	NA	NA	NA	NA	8.5345	0.000660197	4.73206e-05	9.08135	4.89106e-06	9.70592e-07	NA	NA	NA	8.49586	0.000639483	0.000272902	-0.887579	0.25731	0.115407	0.53288	0.595157	0.36366
C10090_13037	mmu_circ_0003317	mmu_circ_0003317	8.30469	0.00328533	0.000689242	NA	NA	NA	NA	NA	NA	8.80607	0.000353807	0.000153355	8.21286	0.00236164	0.000348676	8.61176	0.000146261	4.4526e-05	-8.80607	0.000169458	5.48578e-06	-8.80607	0.000186211	6.3952e-05	-0.417991	0.688732	0.491742	8.2635	0.00587159	0.00147413
C10090_14096	mmu_circ_0003318	mmu_circ_0003318	0.0974272	0.78595	0.63284	-0.251803	0.131642	0.0991162	-0.13813	0.903038	0.791226	0.392858	0.32058	0.263588	0.180004	0.686771	0.425498	-0.113384	0.716346	0.64571	-0.202366	0.590219	0.336898	0.118068	0.689151	0.614494	0.673457	0.0139585	0.0039627	0.215392	0.607088	0.373956
C10090_250	mmu_circ_0003329	mmu_circ_0003329	-0.239646	0.782926	0.617416	-0.81802	0.0742981	0.0537148	-0.0791341	0.987414	0.968182	-9.11035	7.96395e-06	2.2639e-06	-8.51491	0.000699397	3.999e-05	-0.0186567	0.989765	0.984692	8.52982	0.0015295	0.00014375	9.20628	7.24235e-06	1.51848e-06	0.834886	0.246897	0.108229	-9.20628	5.22226e-05	1.822e-06
C10090_5970	mmu_circ_0003330	mmu_circ_0003330	-0.525875	0.36499	0.195045	0.645698	0.146126	0.111371	0.395213	0.478868	0.265416	1.75405	1.19531e-06	2.96394e-07	0.773784	0.00487746	0.000973102	1.35963	7.30717e-09	7.89438e-10	0.120964	0.824238	0.634016	0.625122	0.0046192	0.00256372	-0.458502	0.0536158	0.0174498	-0.565408	0.0179976	0.00494702
C10090_13001	mmu_circ_0003331	mmu_circ_0003331	NA	NA	NA	NA	NA	NA	NA	NA	NA	NA	NA	NA	NA	NA	NA	NA	NA	NA	8.43003	0.00225129	0.000260958	8.49586	0.000649485	0.000272902	NA	NA	NA	-8.49586	0.00199824	0.00030619
C10090_14655	mmu_circ_0003333	mmu_circ_0003333	NA	NA	NA	8.7077	0.000270515	0.00011419	NA	NA	NA	9.35865	8.28459e-06	2.42796e-06	0.0899573	0.946356	0.863644	1.11072	0.0187318	0.0113819	-1.2765	0.0453396	0.0126322	-0.0744055	0.908697	0.877874	-0.423102	0.492052	0.28612	0.242058	0.798797	0.617834
[truncated: 4,891 more rows]
